# Supplementary material for: Contemporary strategy. Volume 1: Theories and concepts
Source: eLife journal article supplement (doi:10.7554/elife.34292), 1987-01-01
Supplement: supp [file elife-34292-supp-v1.zip]

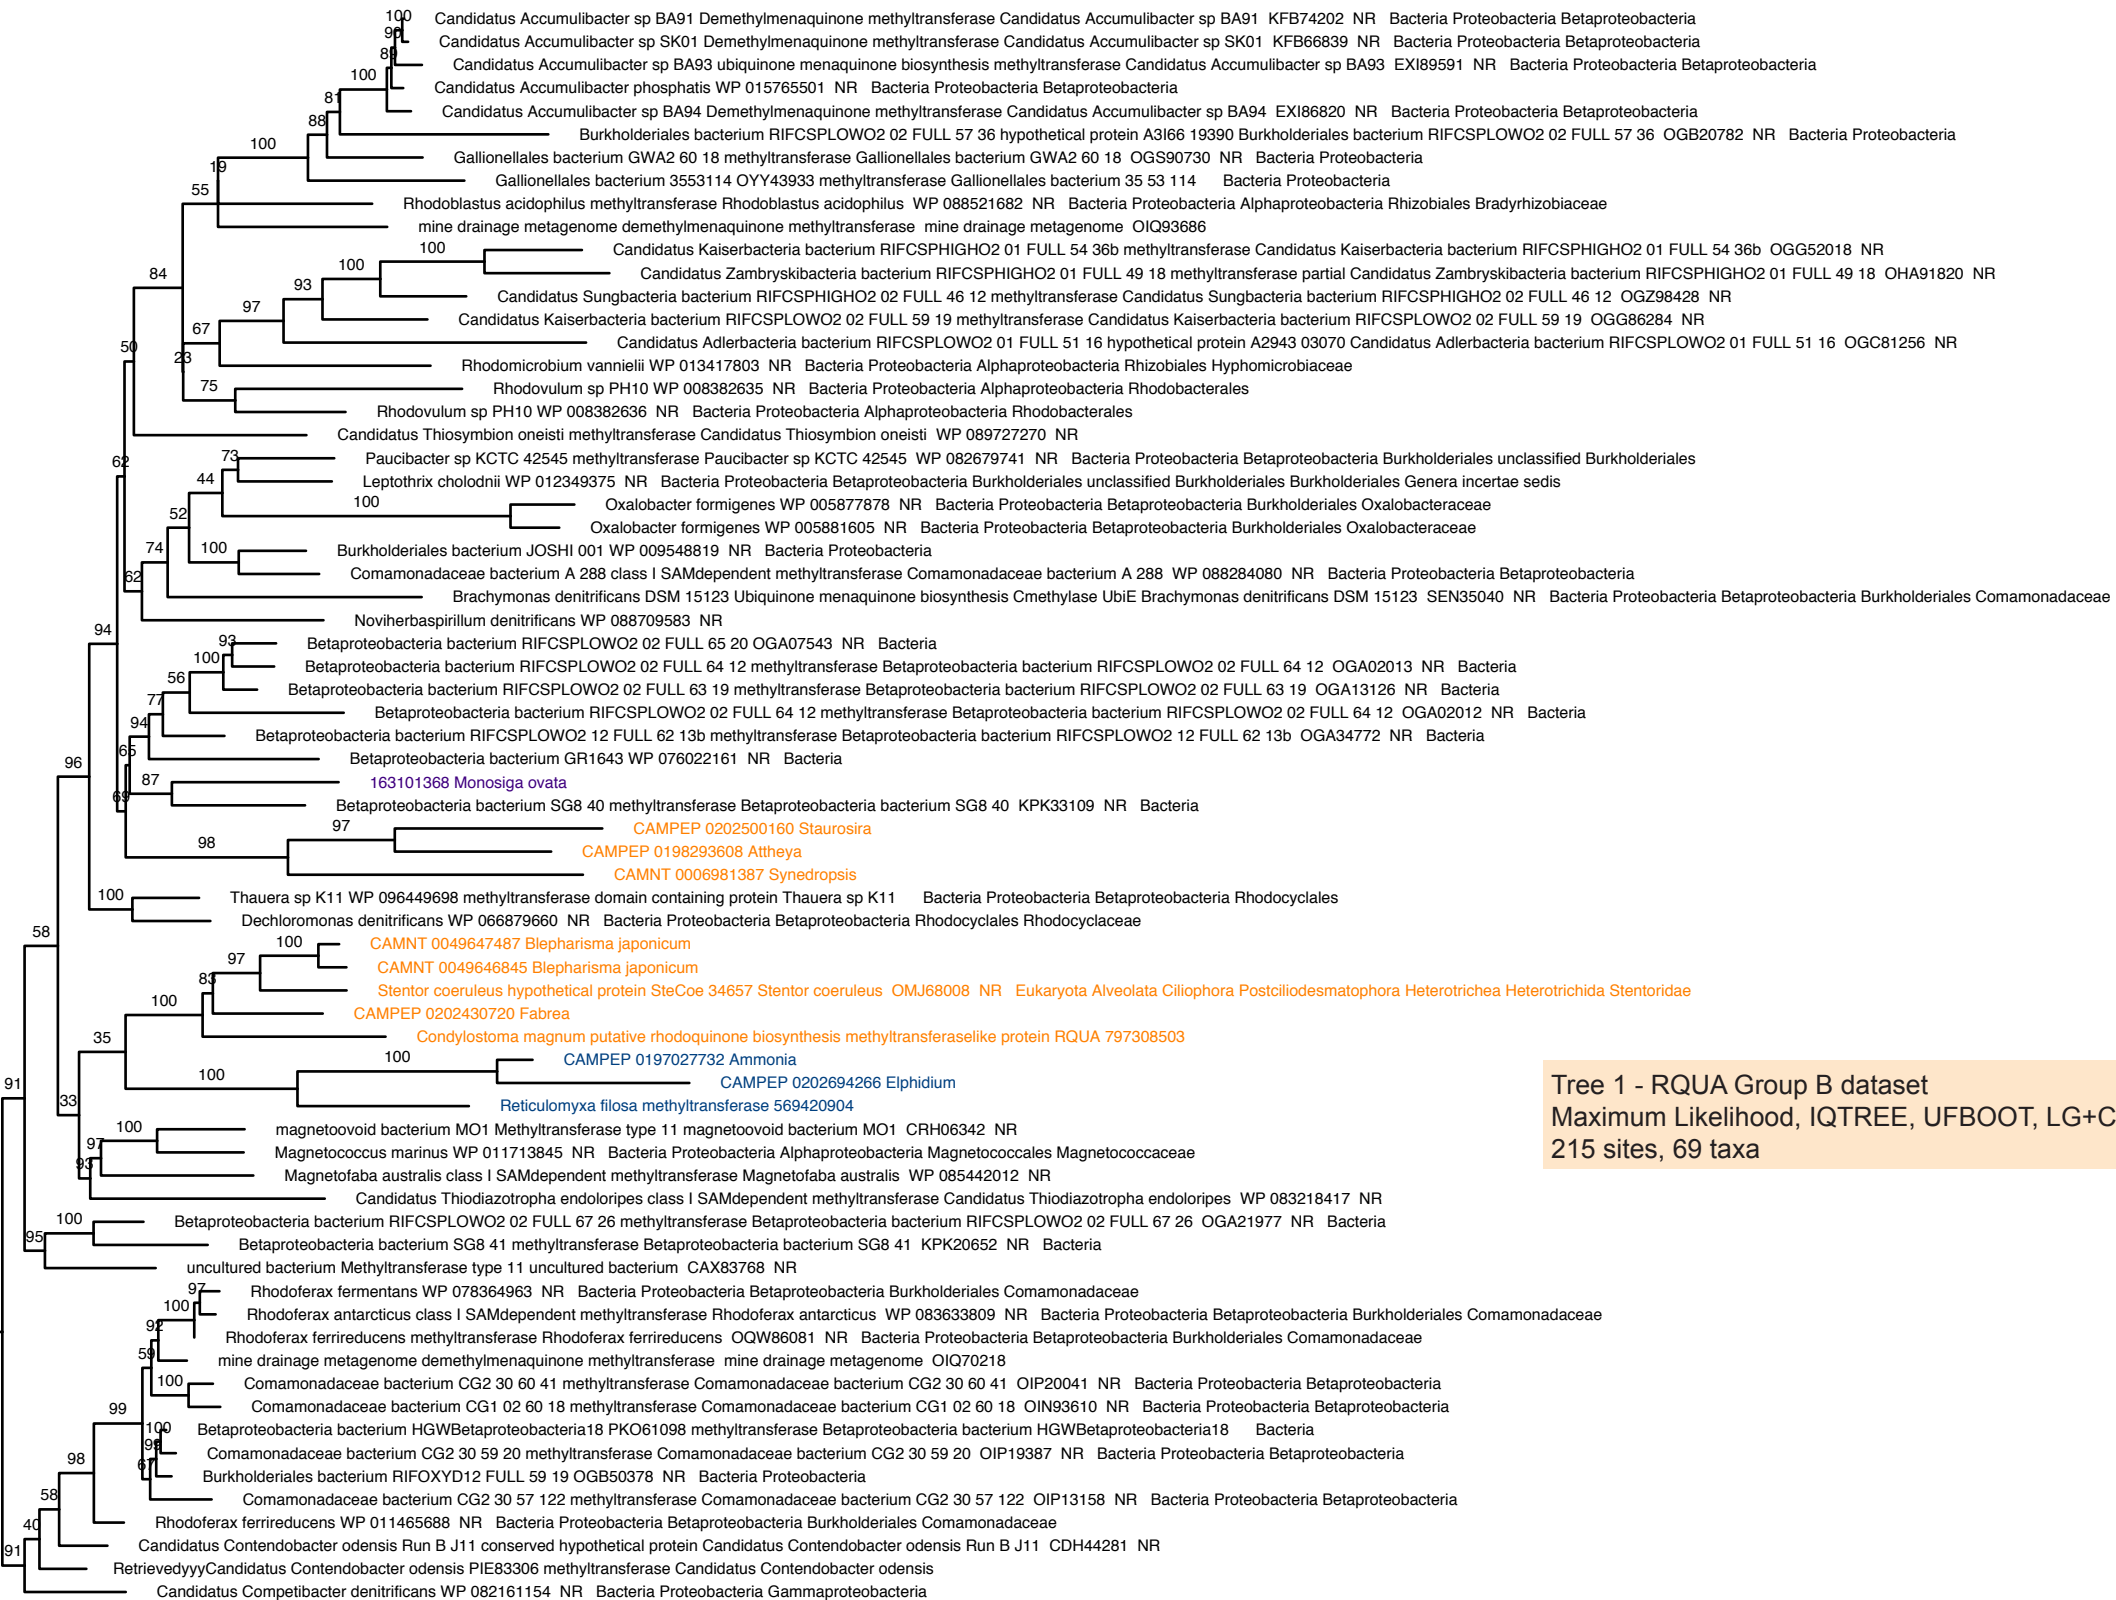

Tree 1 - RQUA Group B dataset  
Maximum Likelihood, IQTREE, UFBOOT, LG+C60  
215 sites, 69 taxa

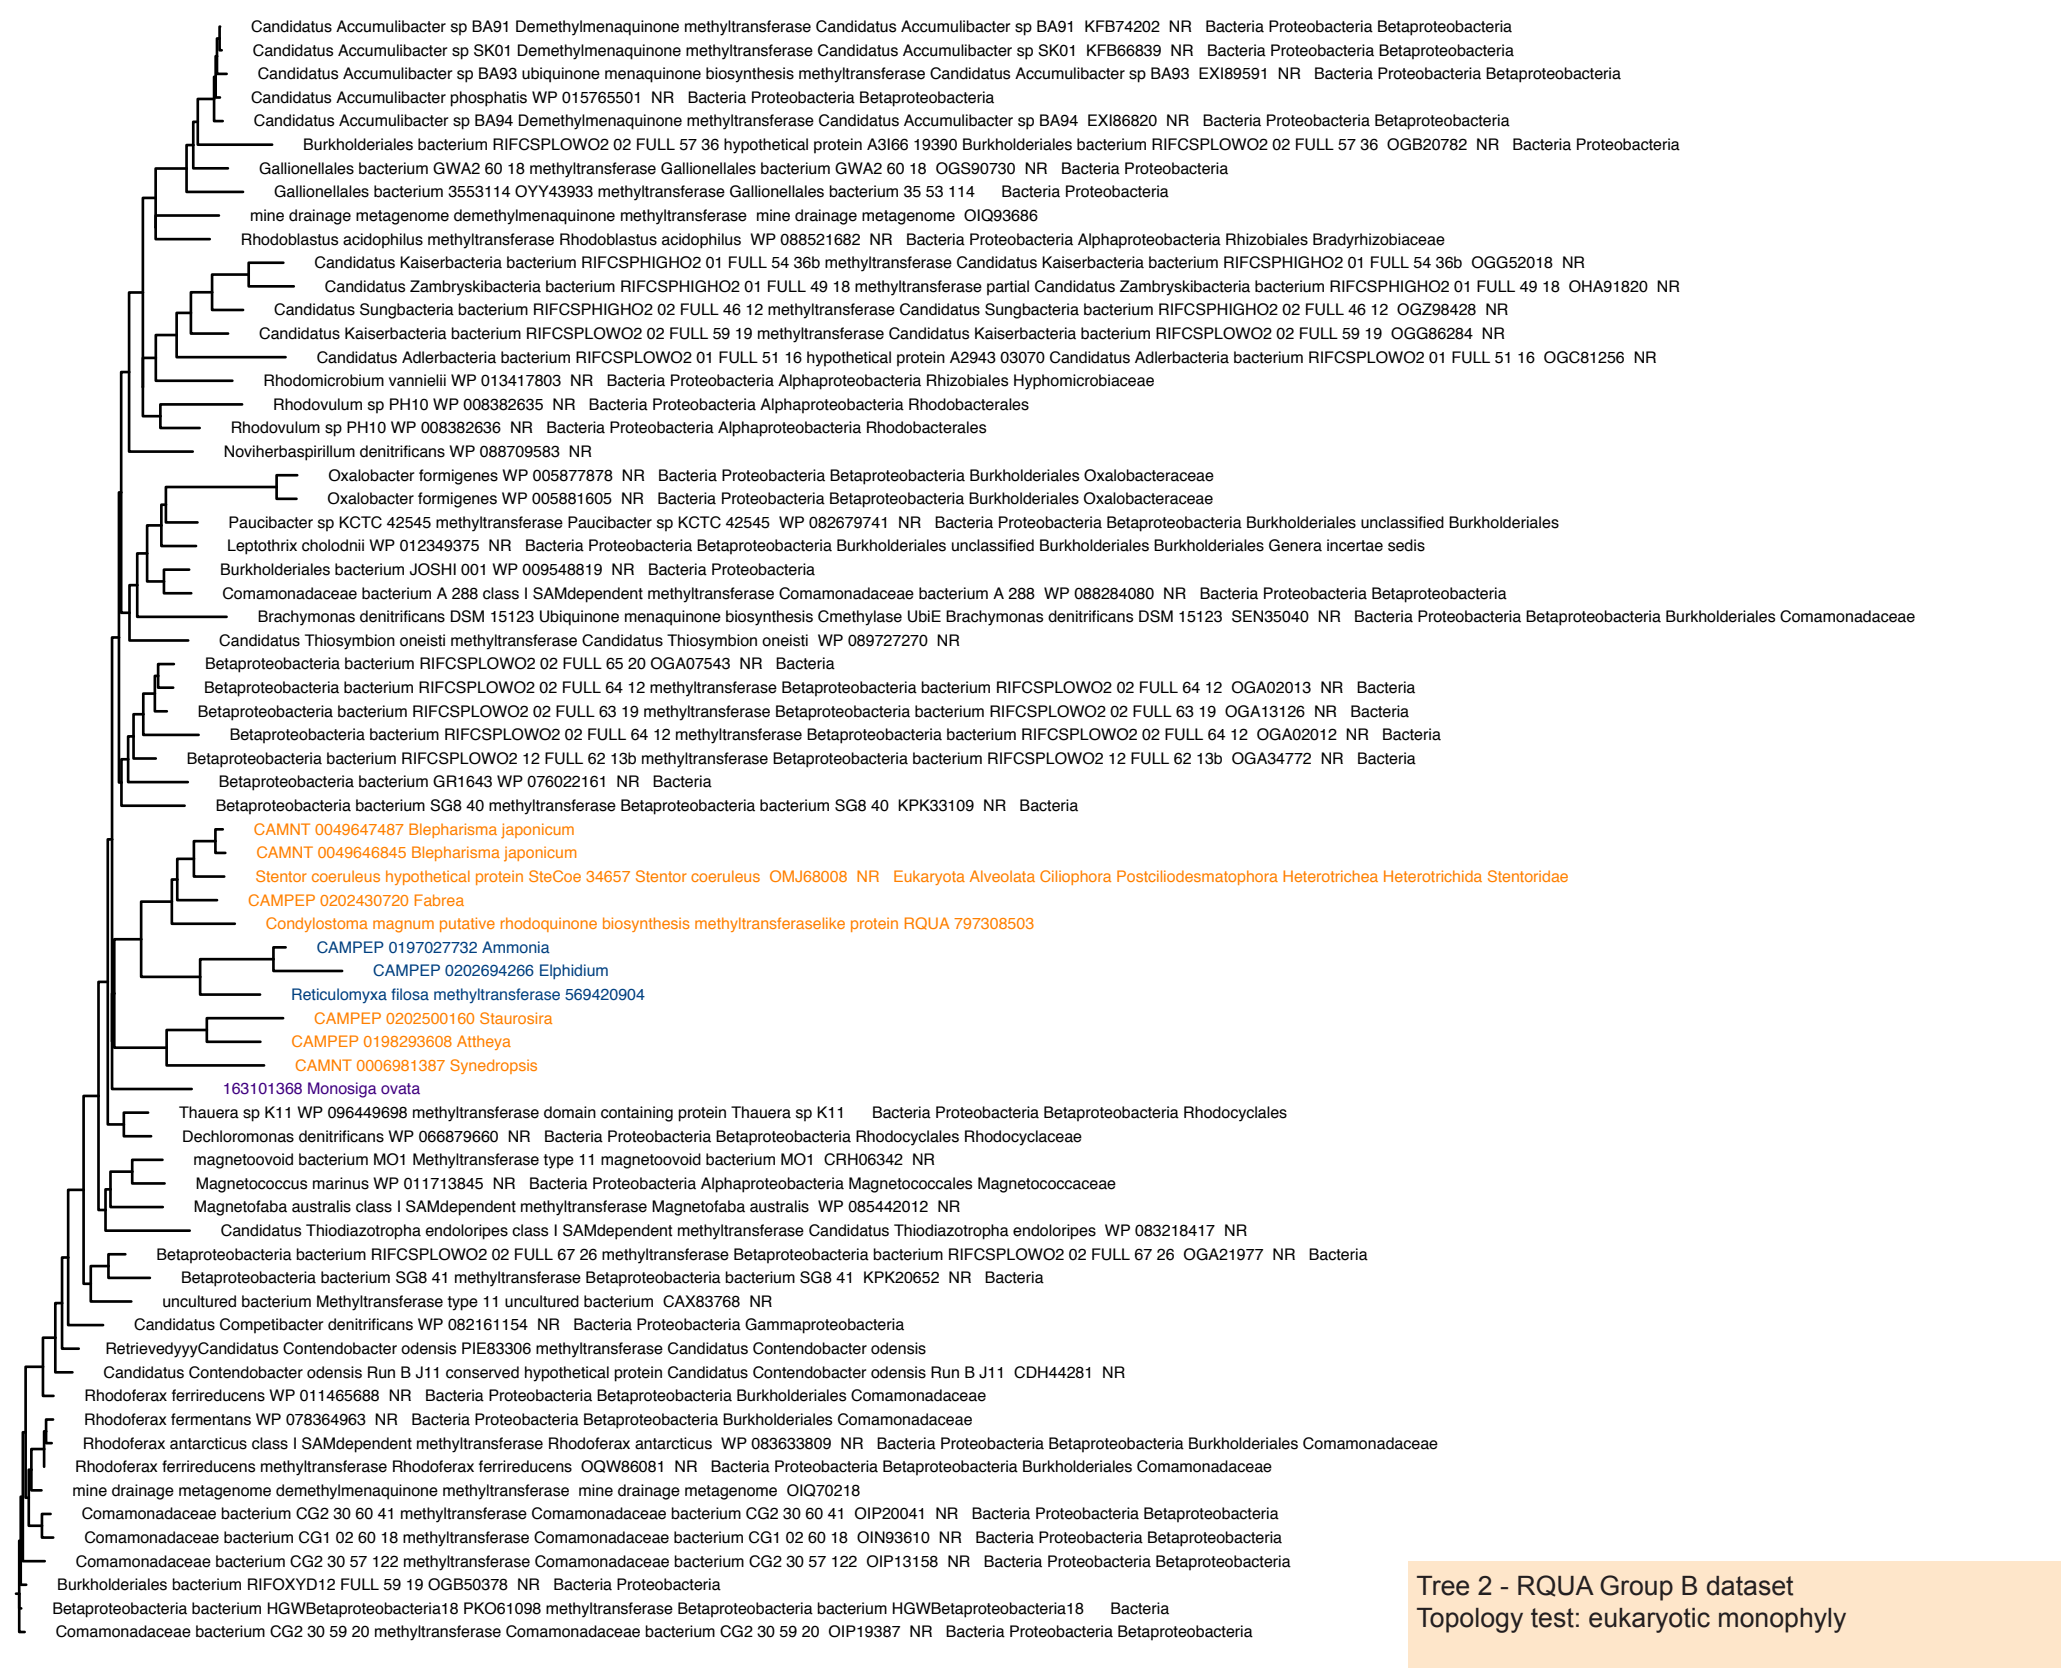

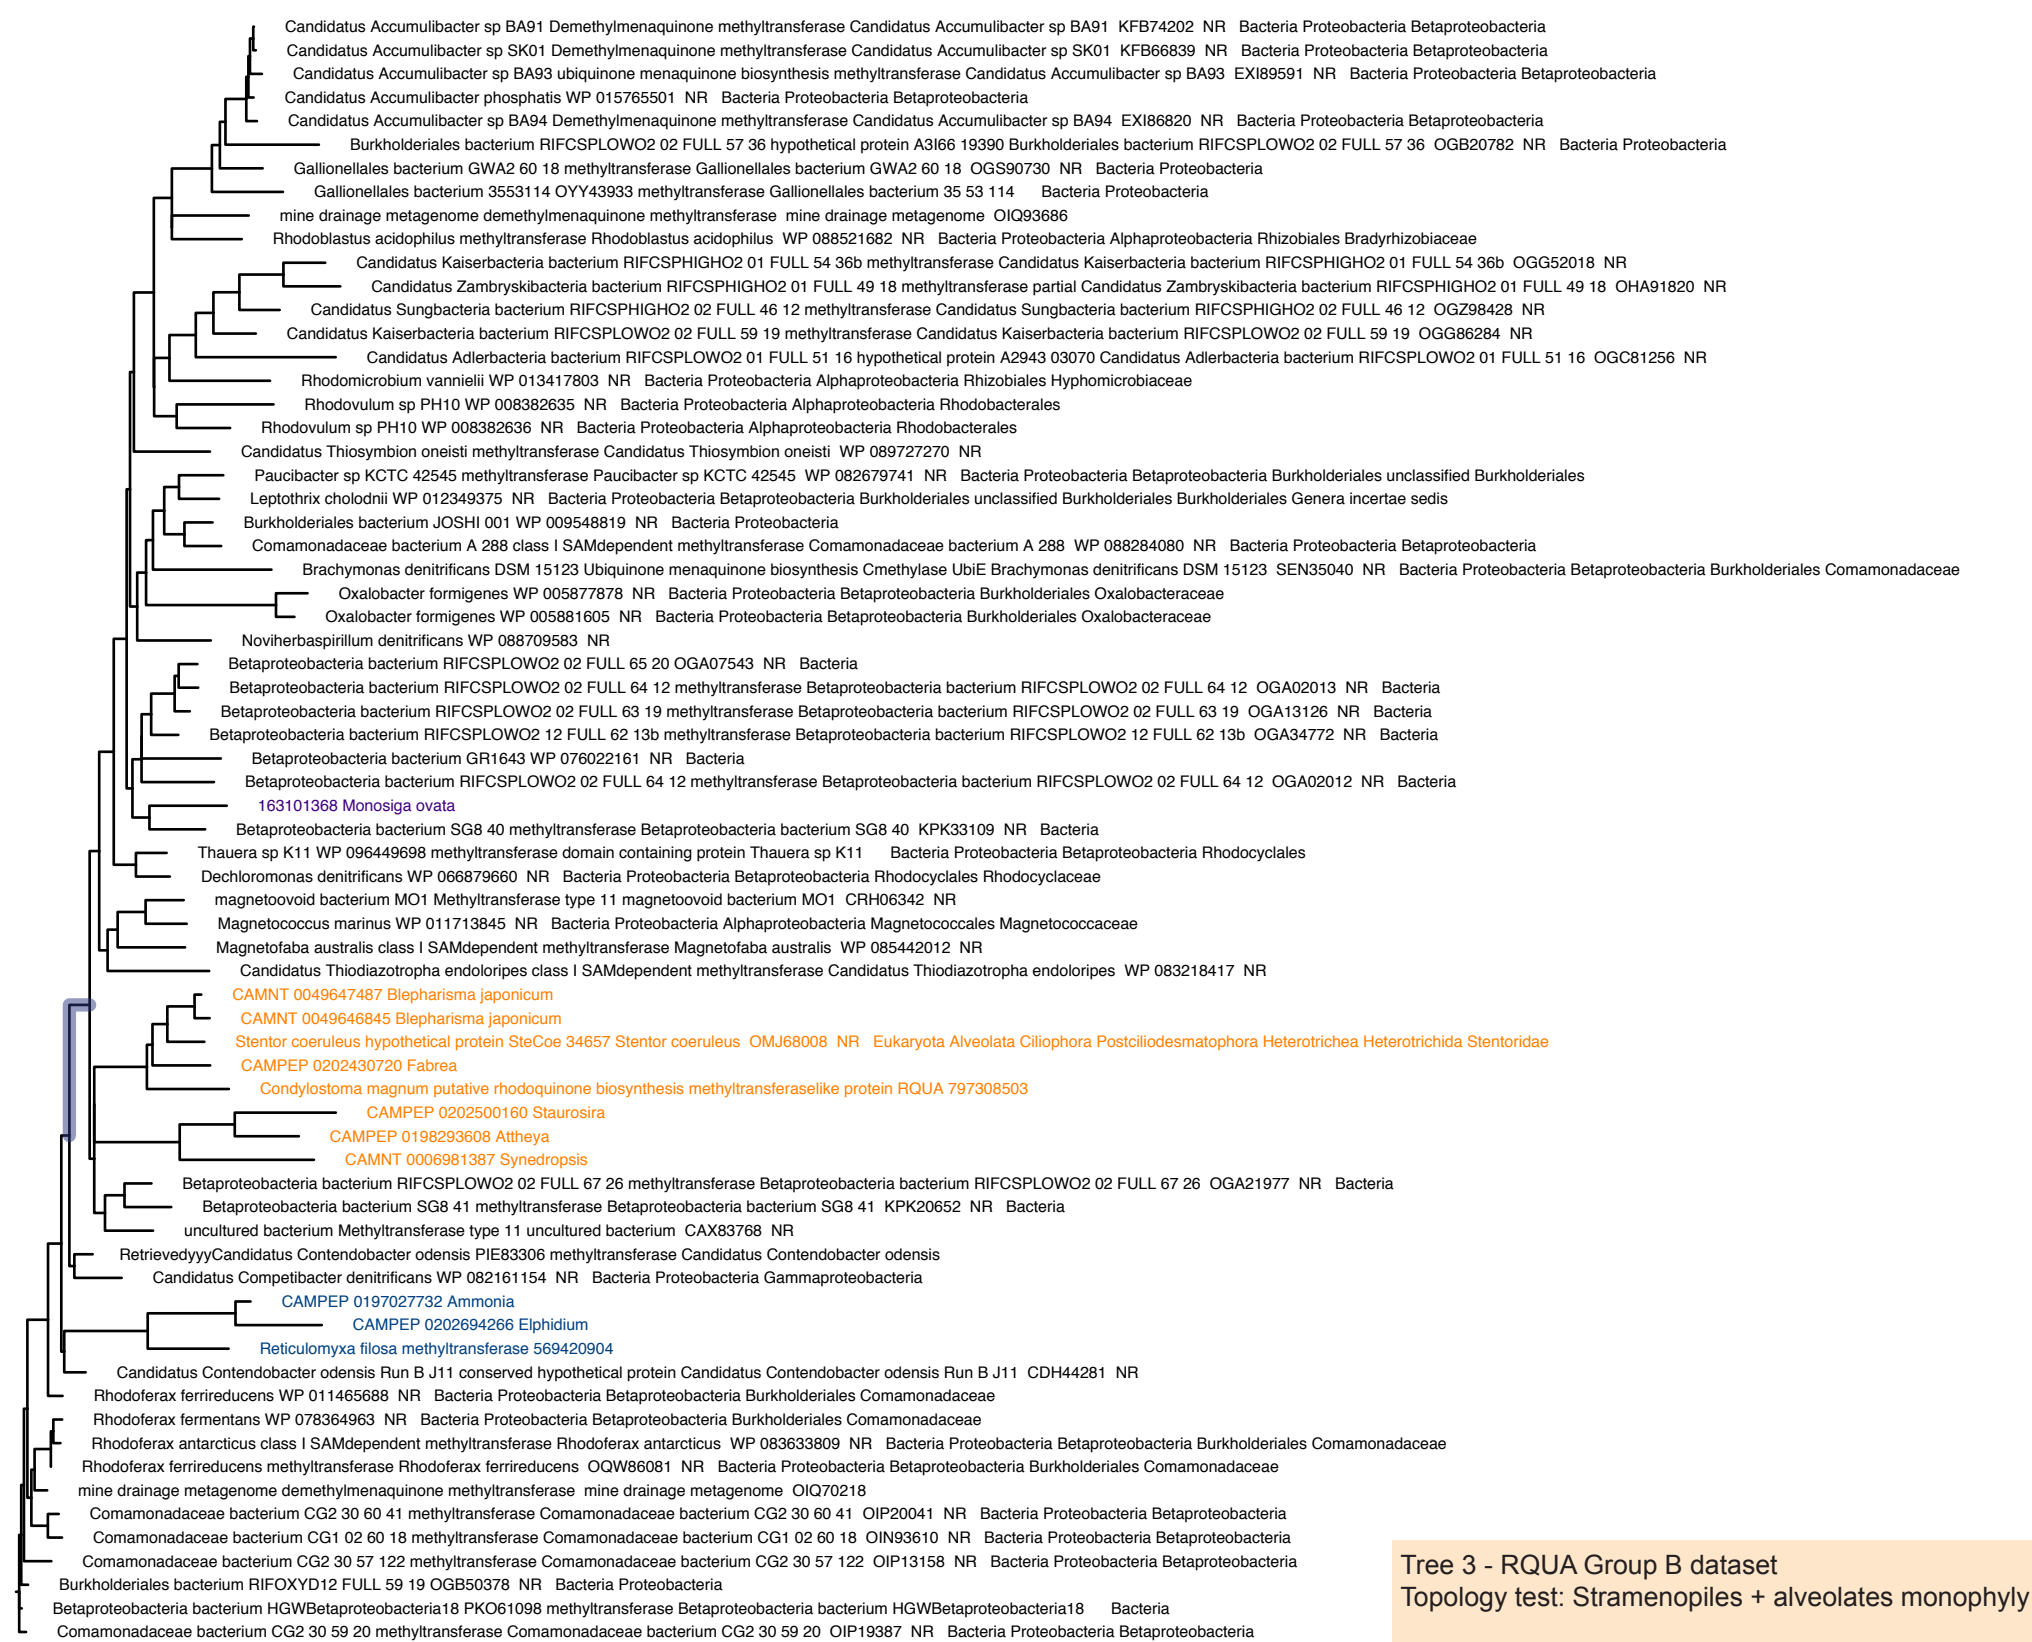

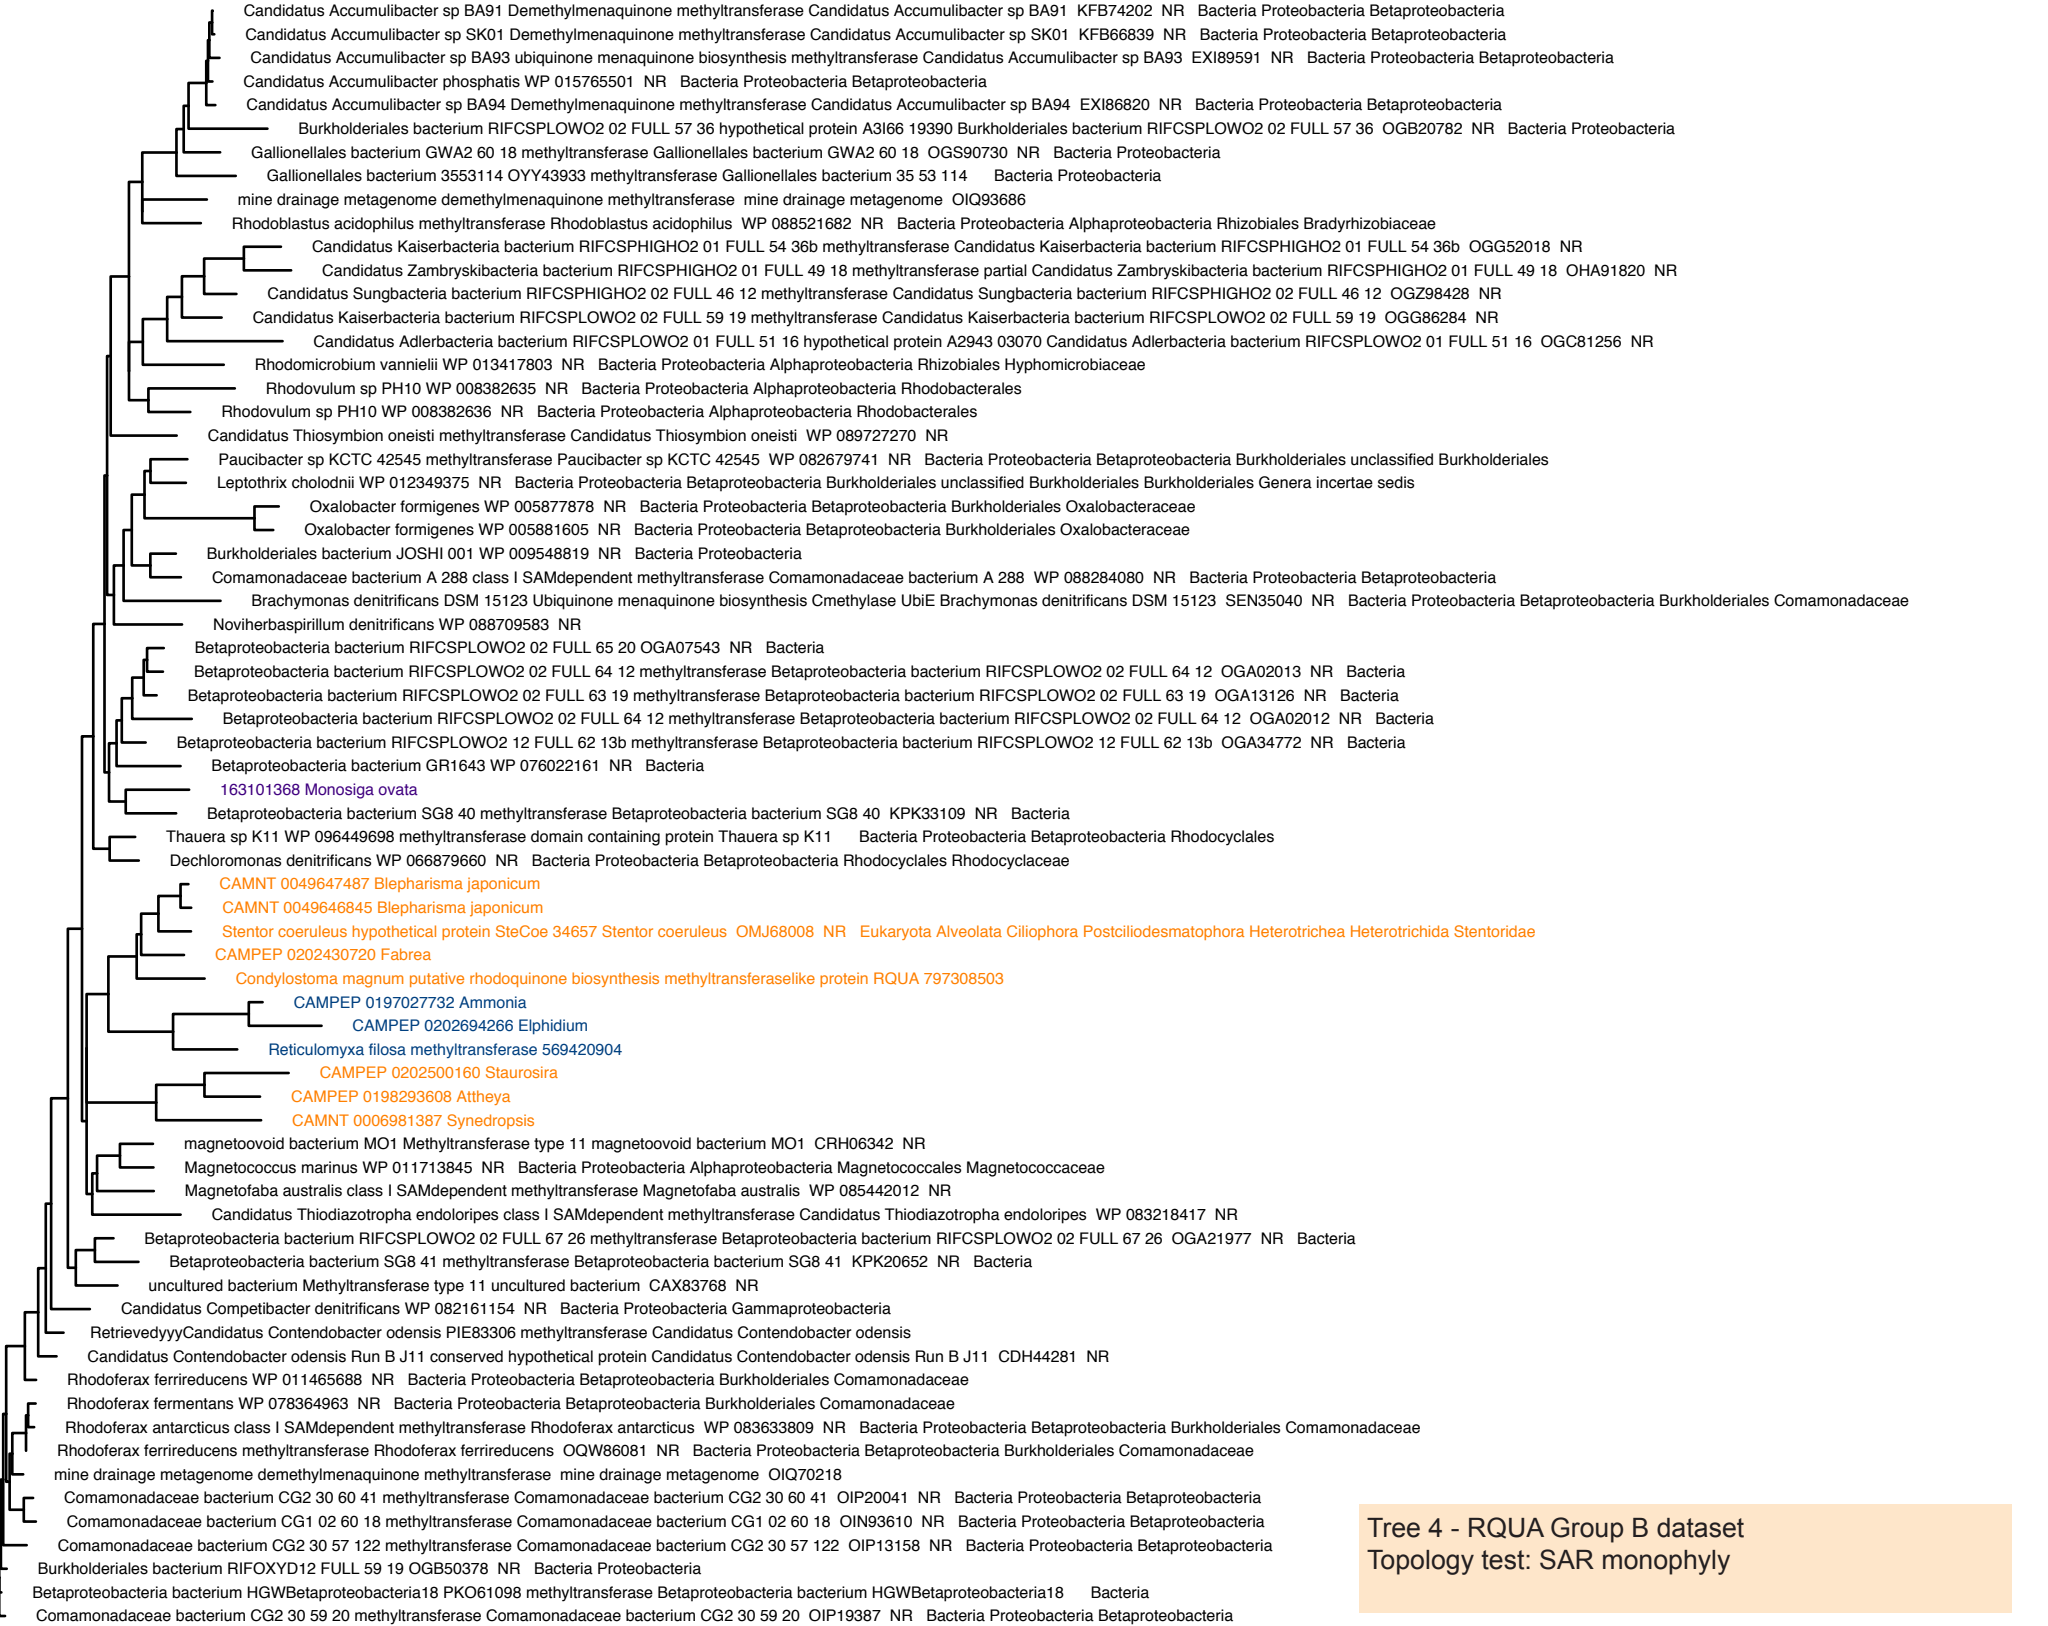

Tree 4 - RQUA Group B dataset  
Topology test: SAR monophyly



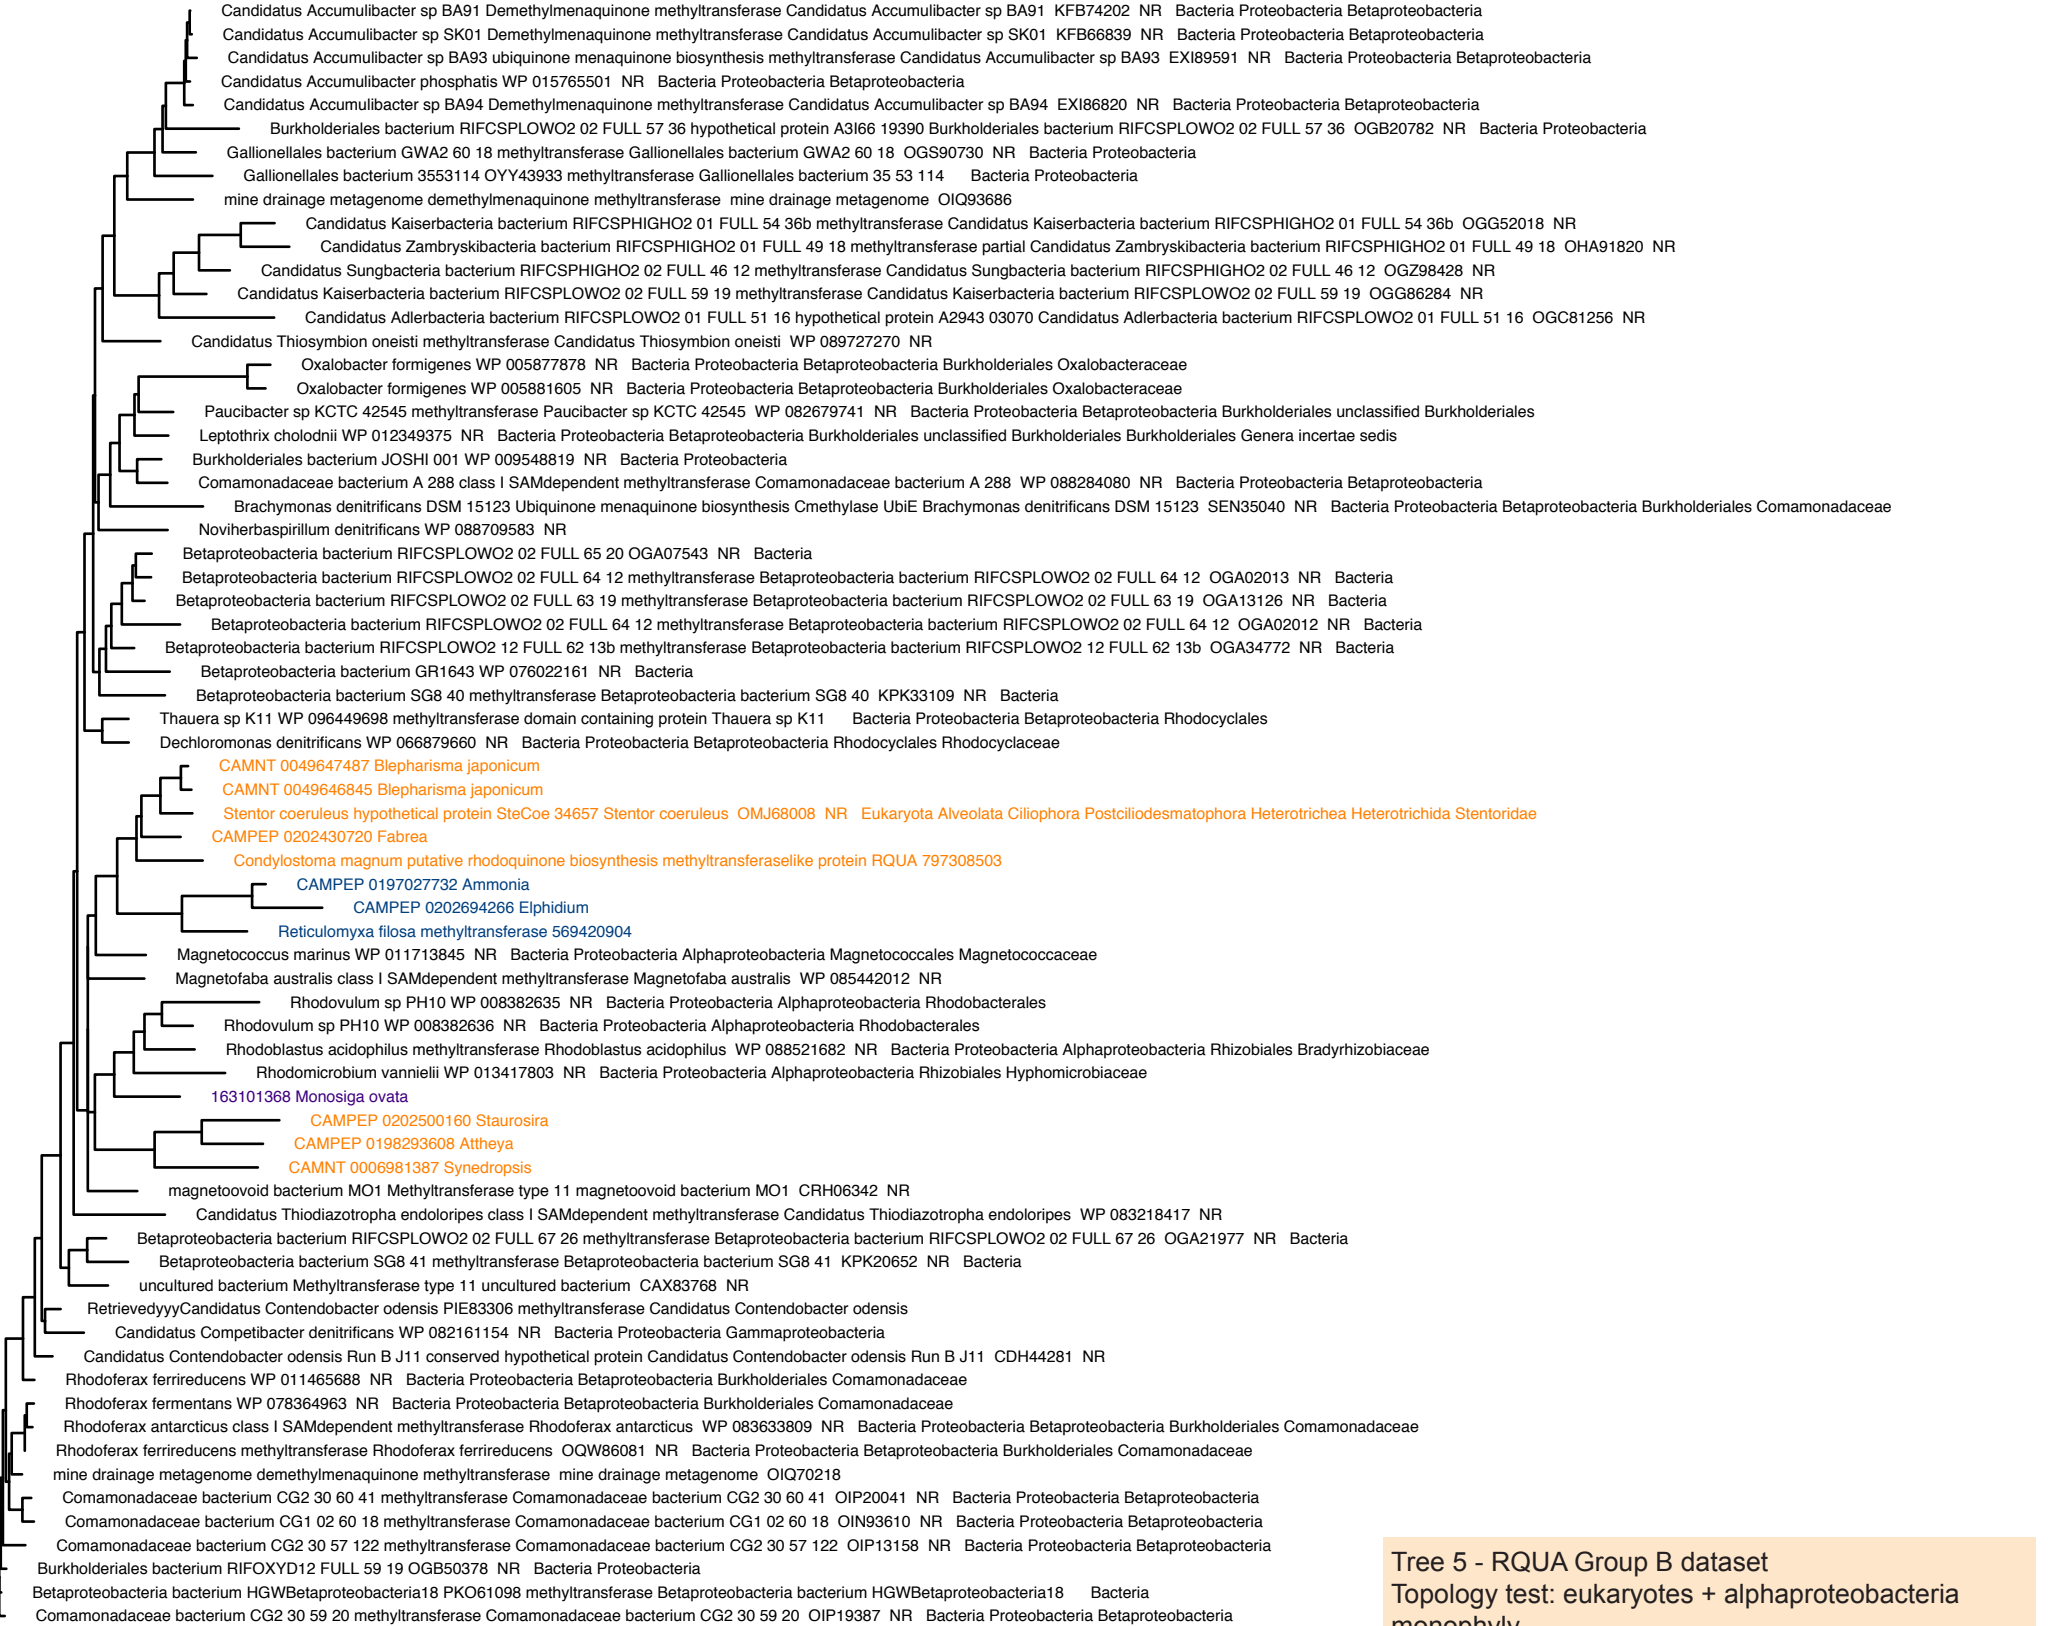

Tree 5 - RQUA Group B dataset  
Topology test: eukaryotes + alphaproteobacteria  
monophyly
