# Supplementary material for: Contemporary strategy. Volume 1: Theories and concepts
Source: eLife journal article supplement (doi:10.7554/elife.34292), 1987-01-01

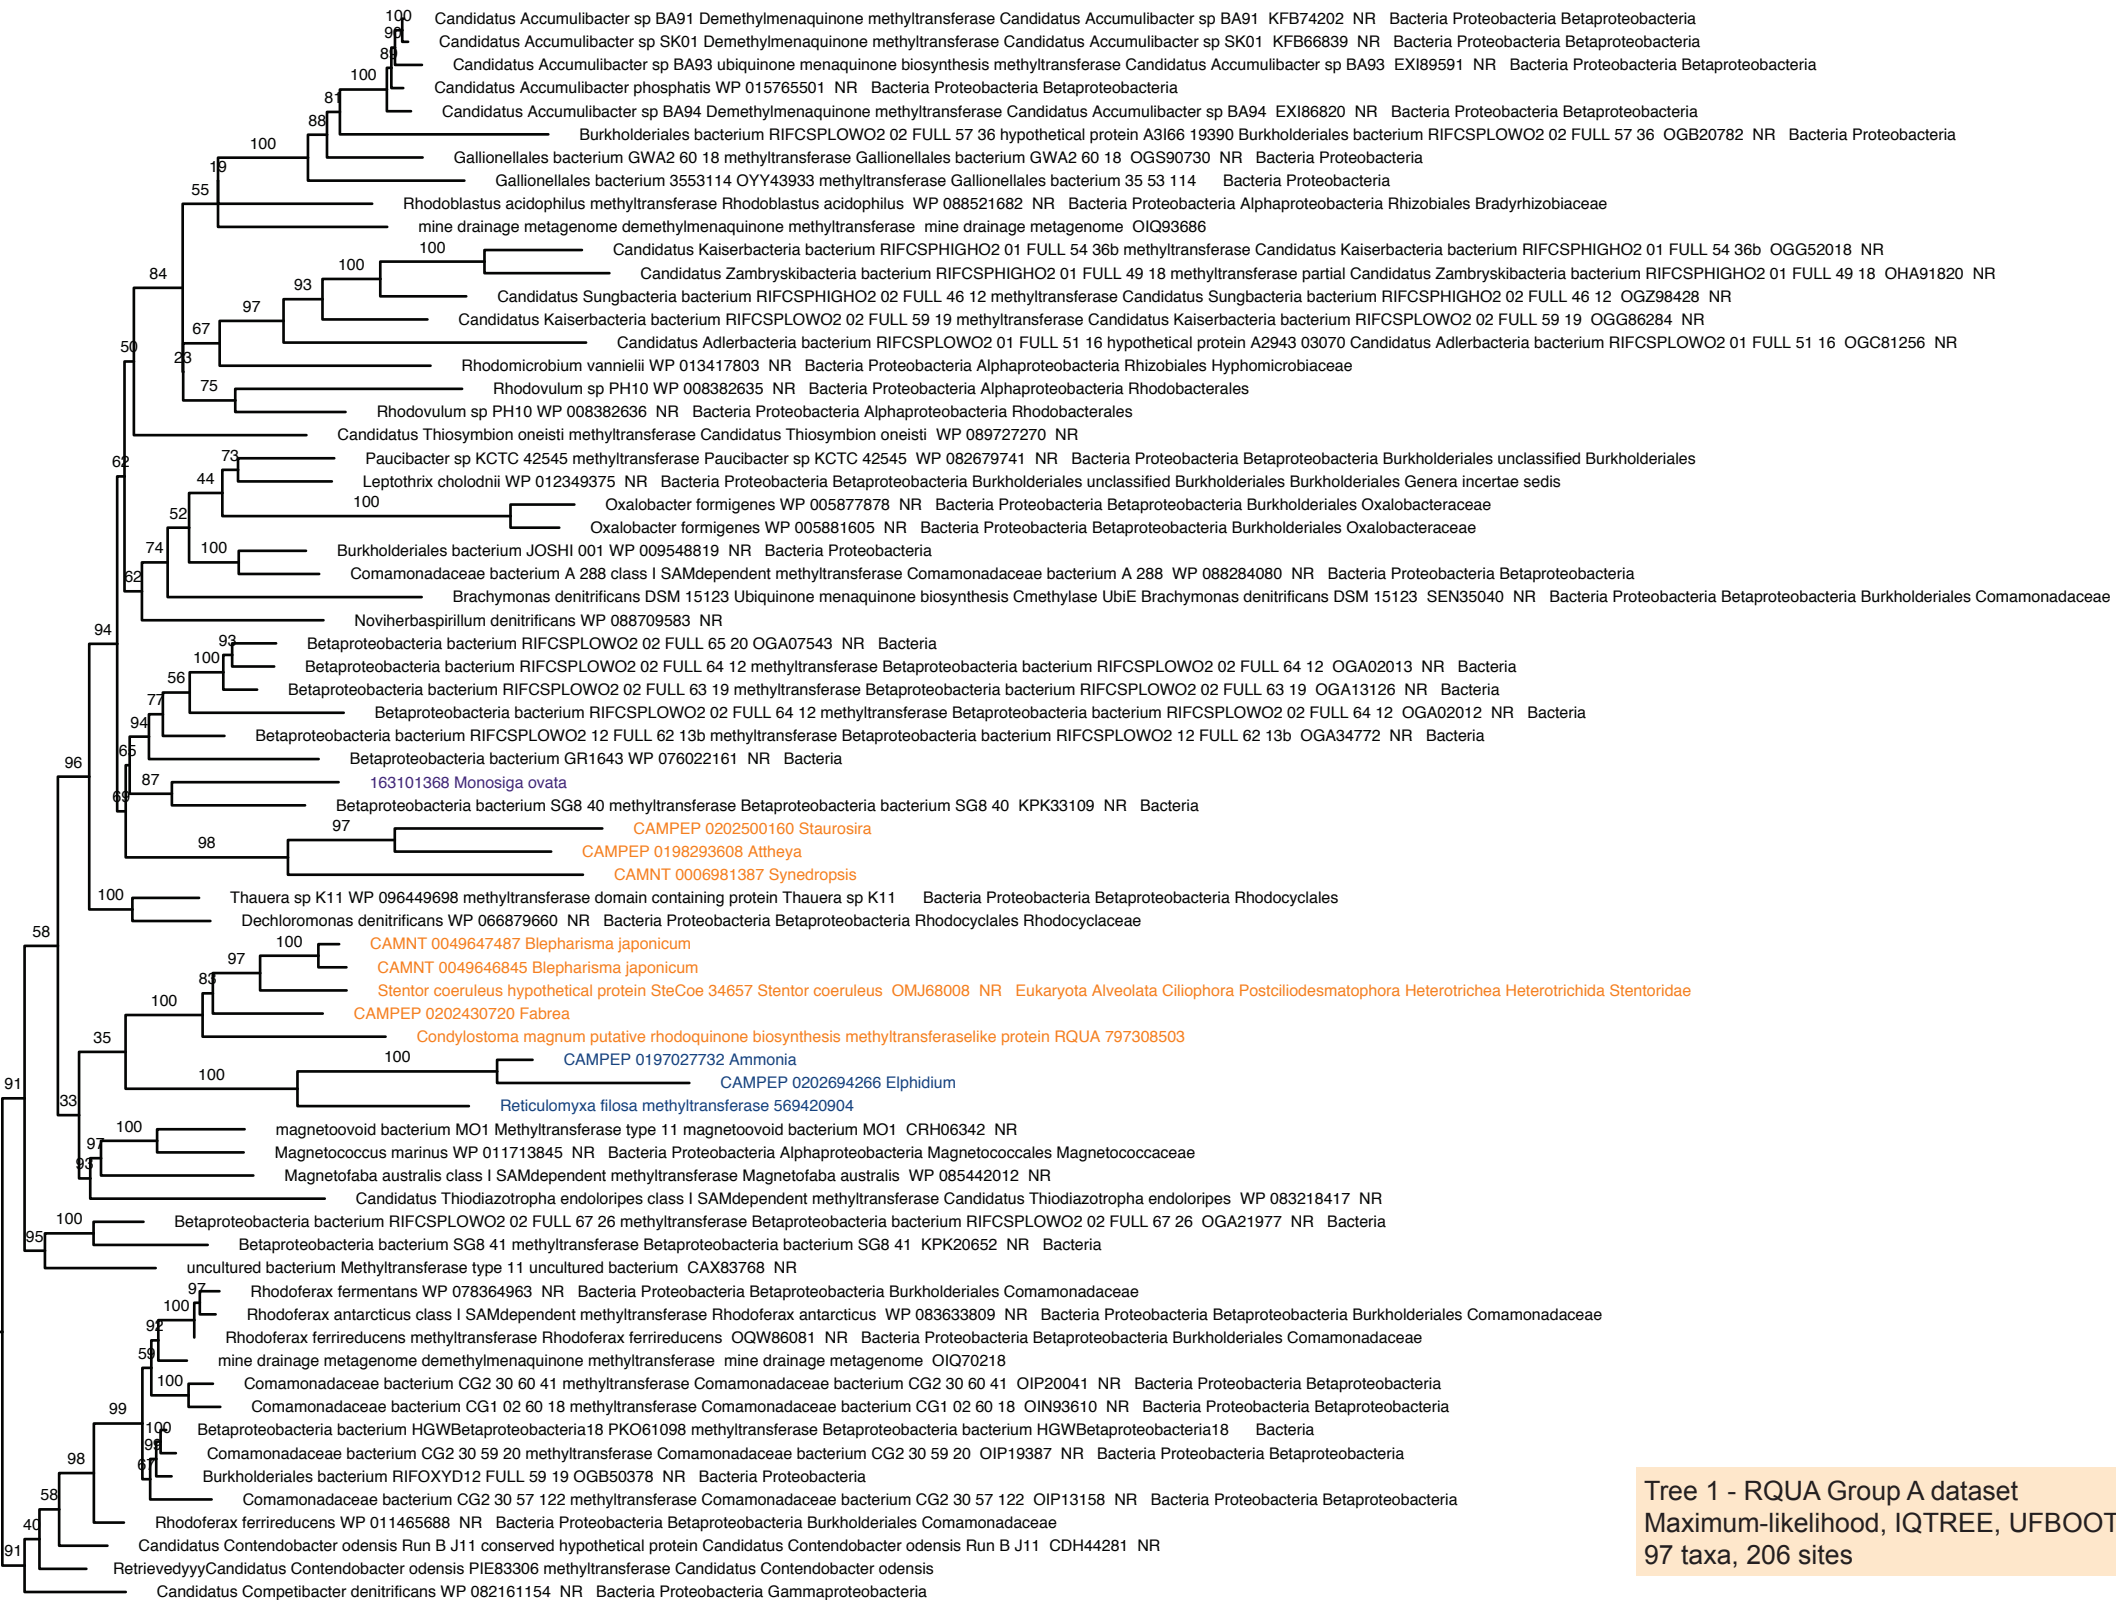

Tree 1 - RQUA Group A dataset  
Maximum-likelihood, IQTREE, UFBOOT - LG+C60  
97 taxa, 206 sites

Tree 2 - RQUA Group A dataset  
Topology test: eukaryote monophyly

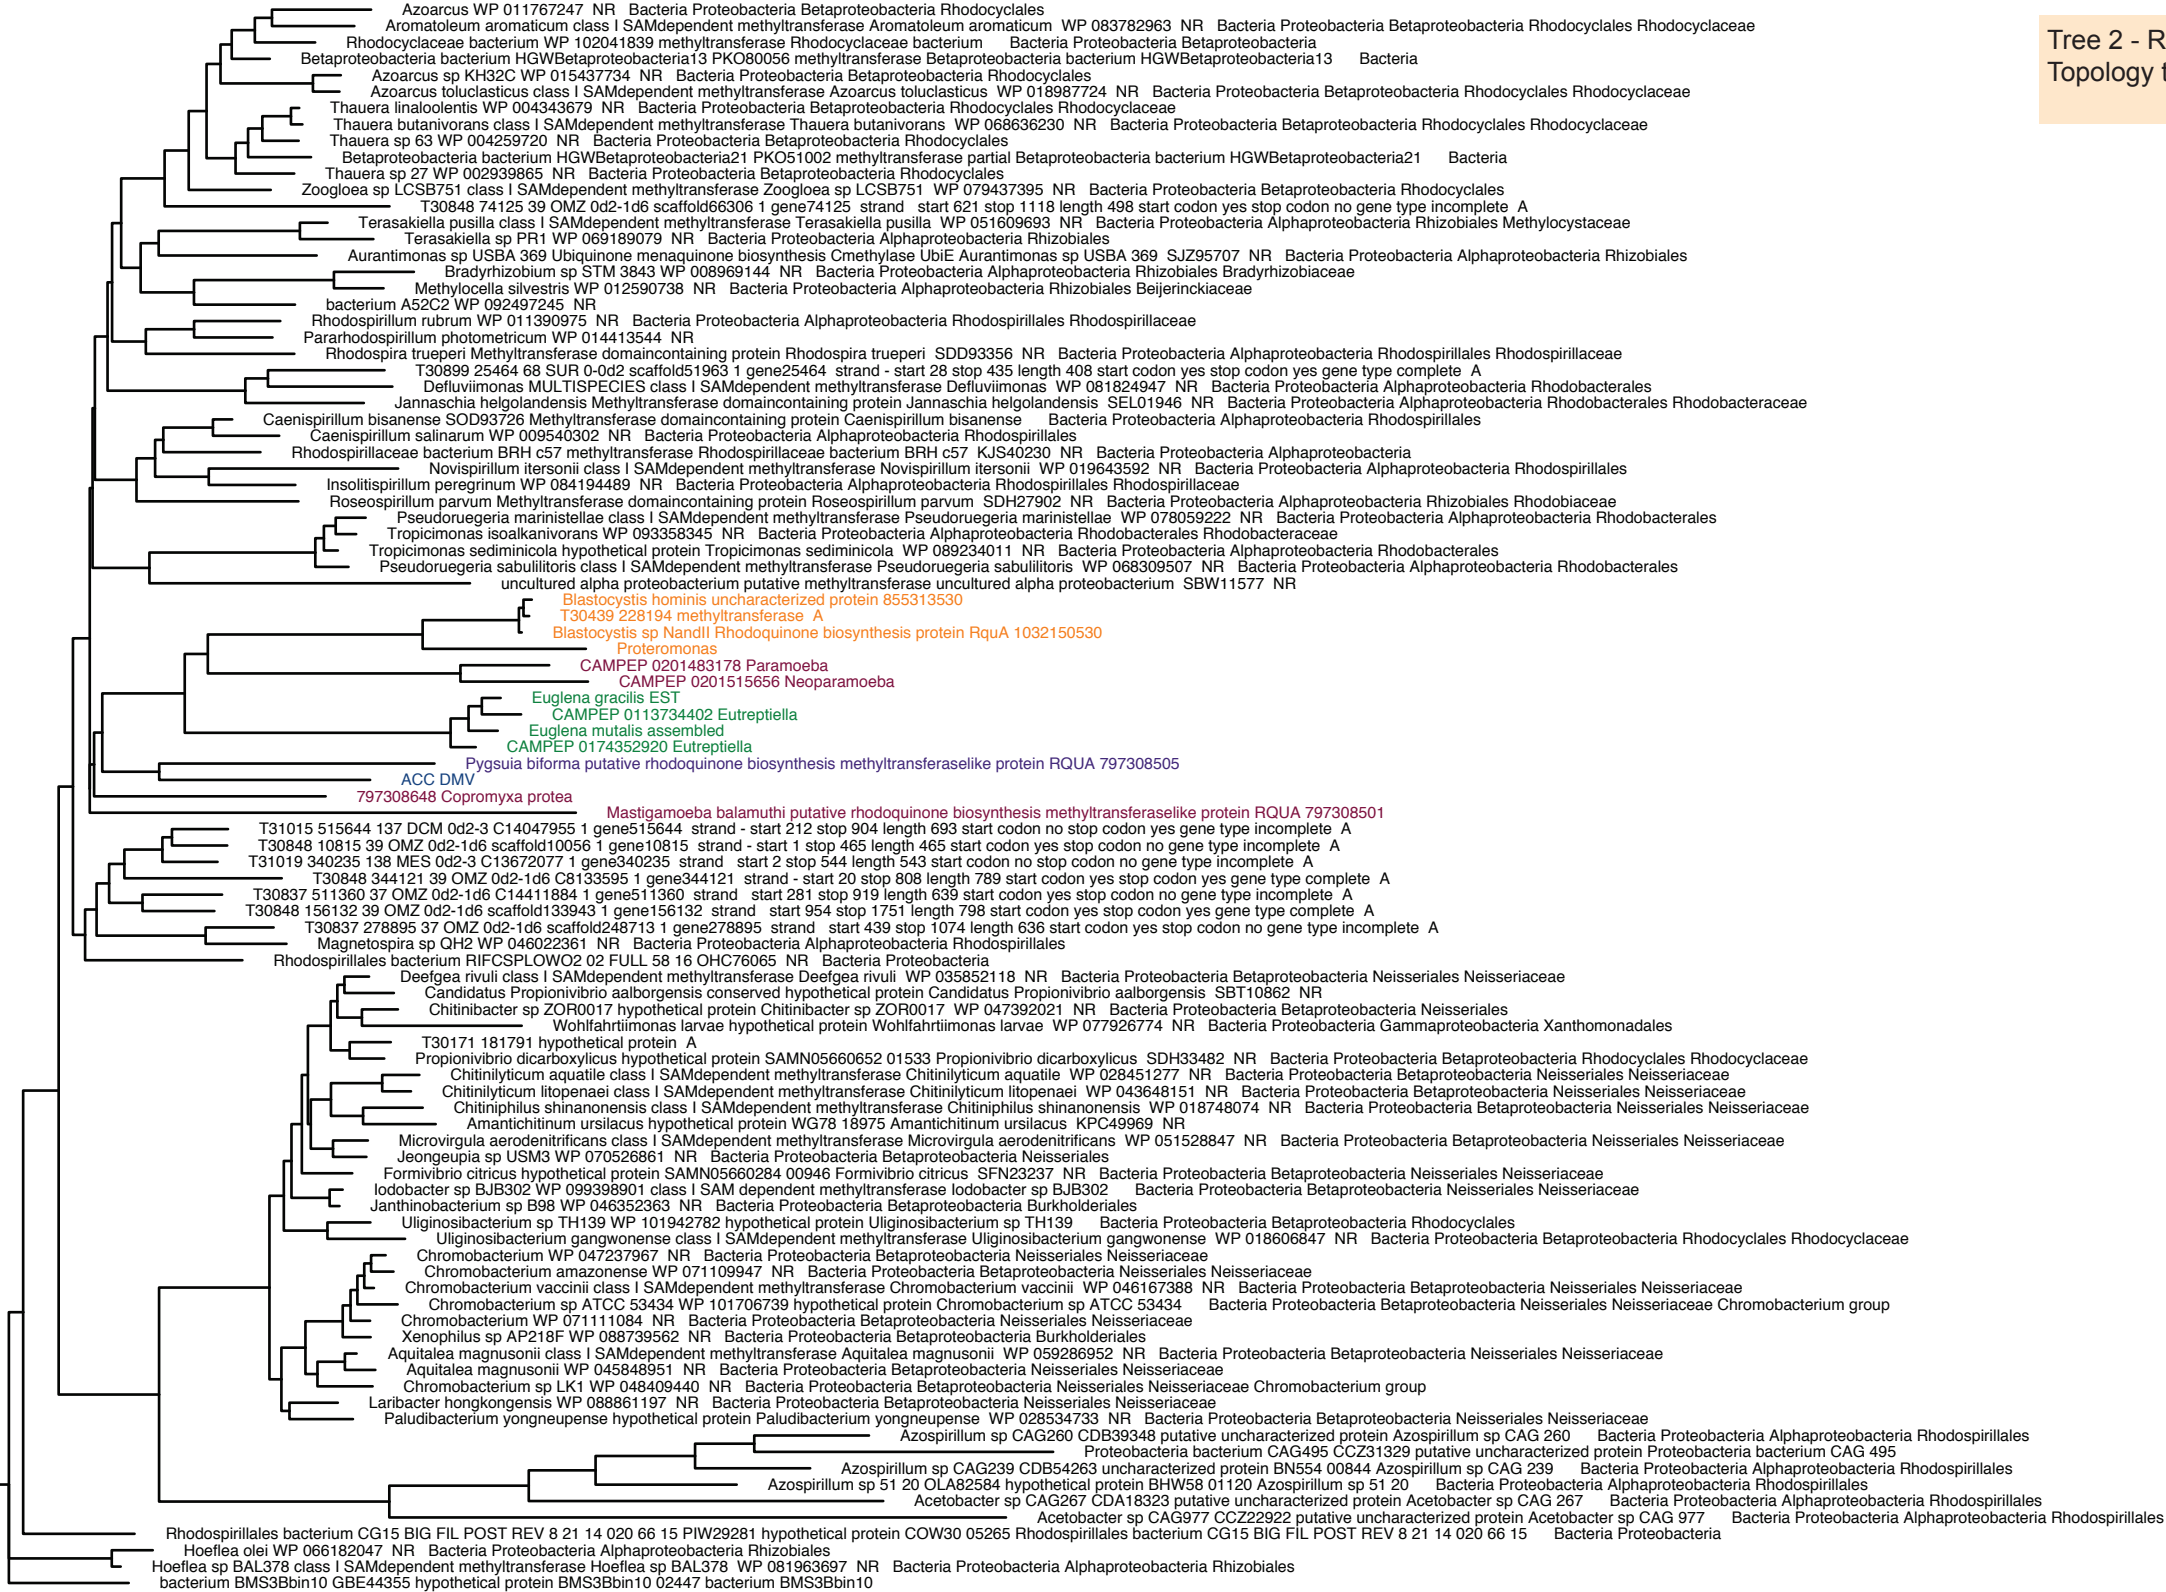

Tree 3 - RQUA Group A dataset  
Topology test: amoebzoa monophyly

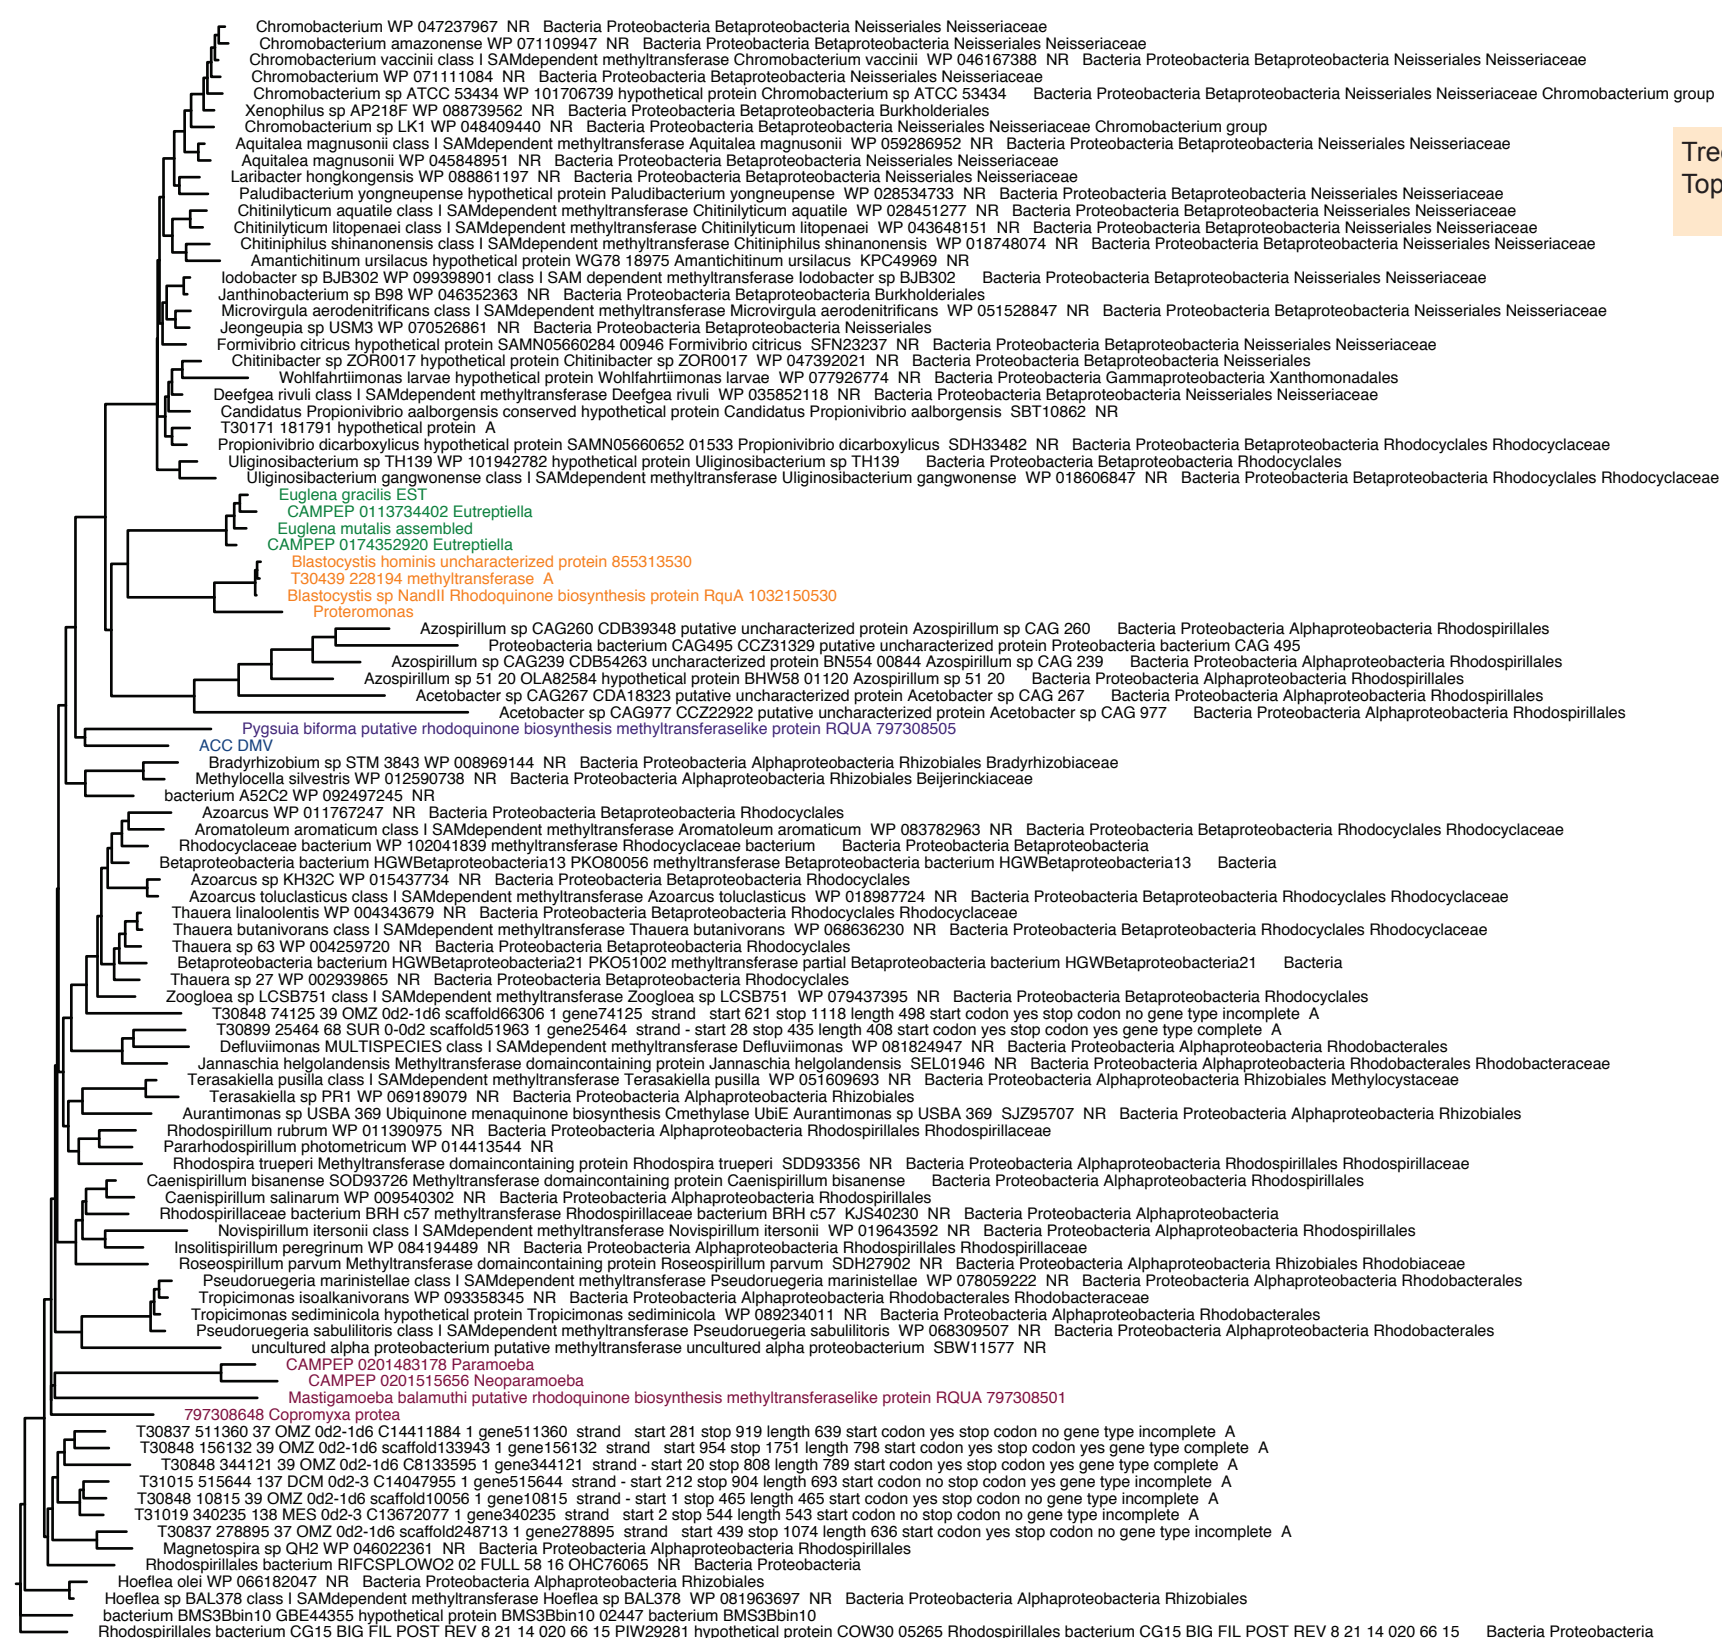



Tree 4 - RQUA Group A dataset  
Topology test: amorphea monophyly

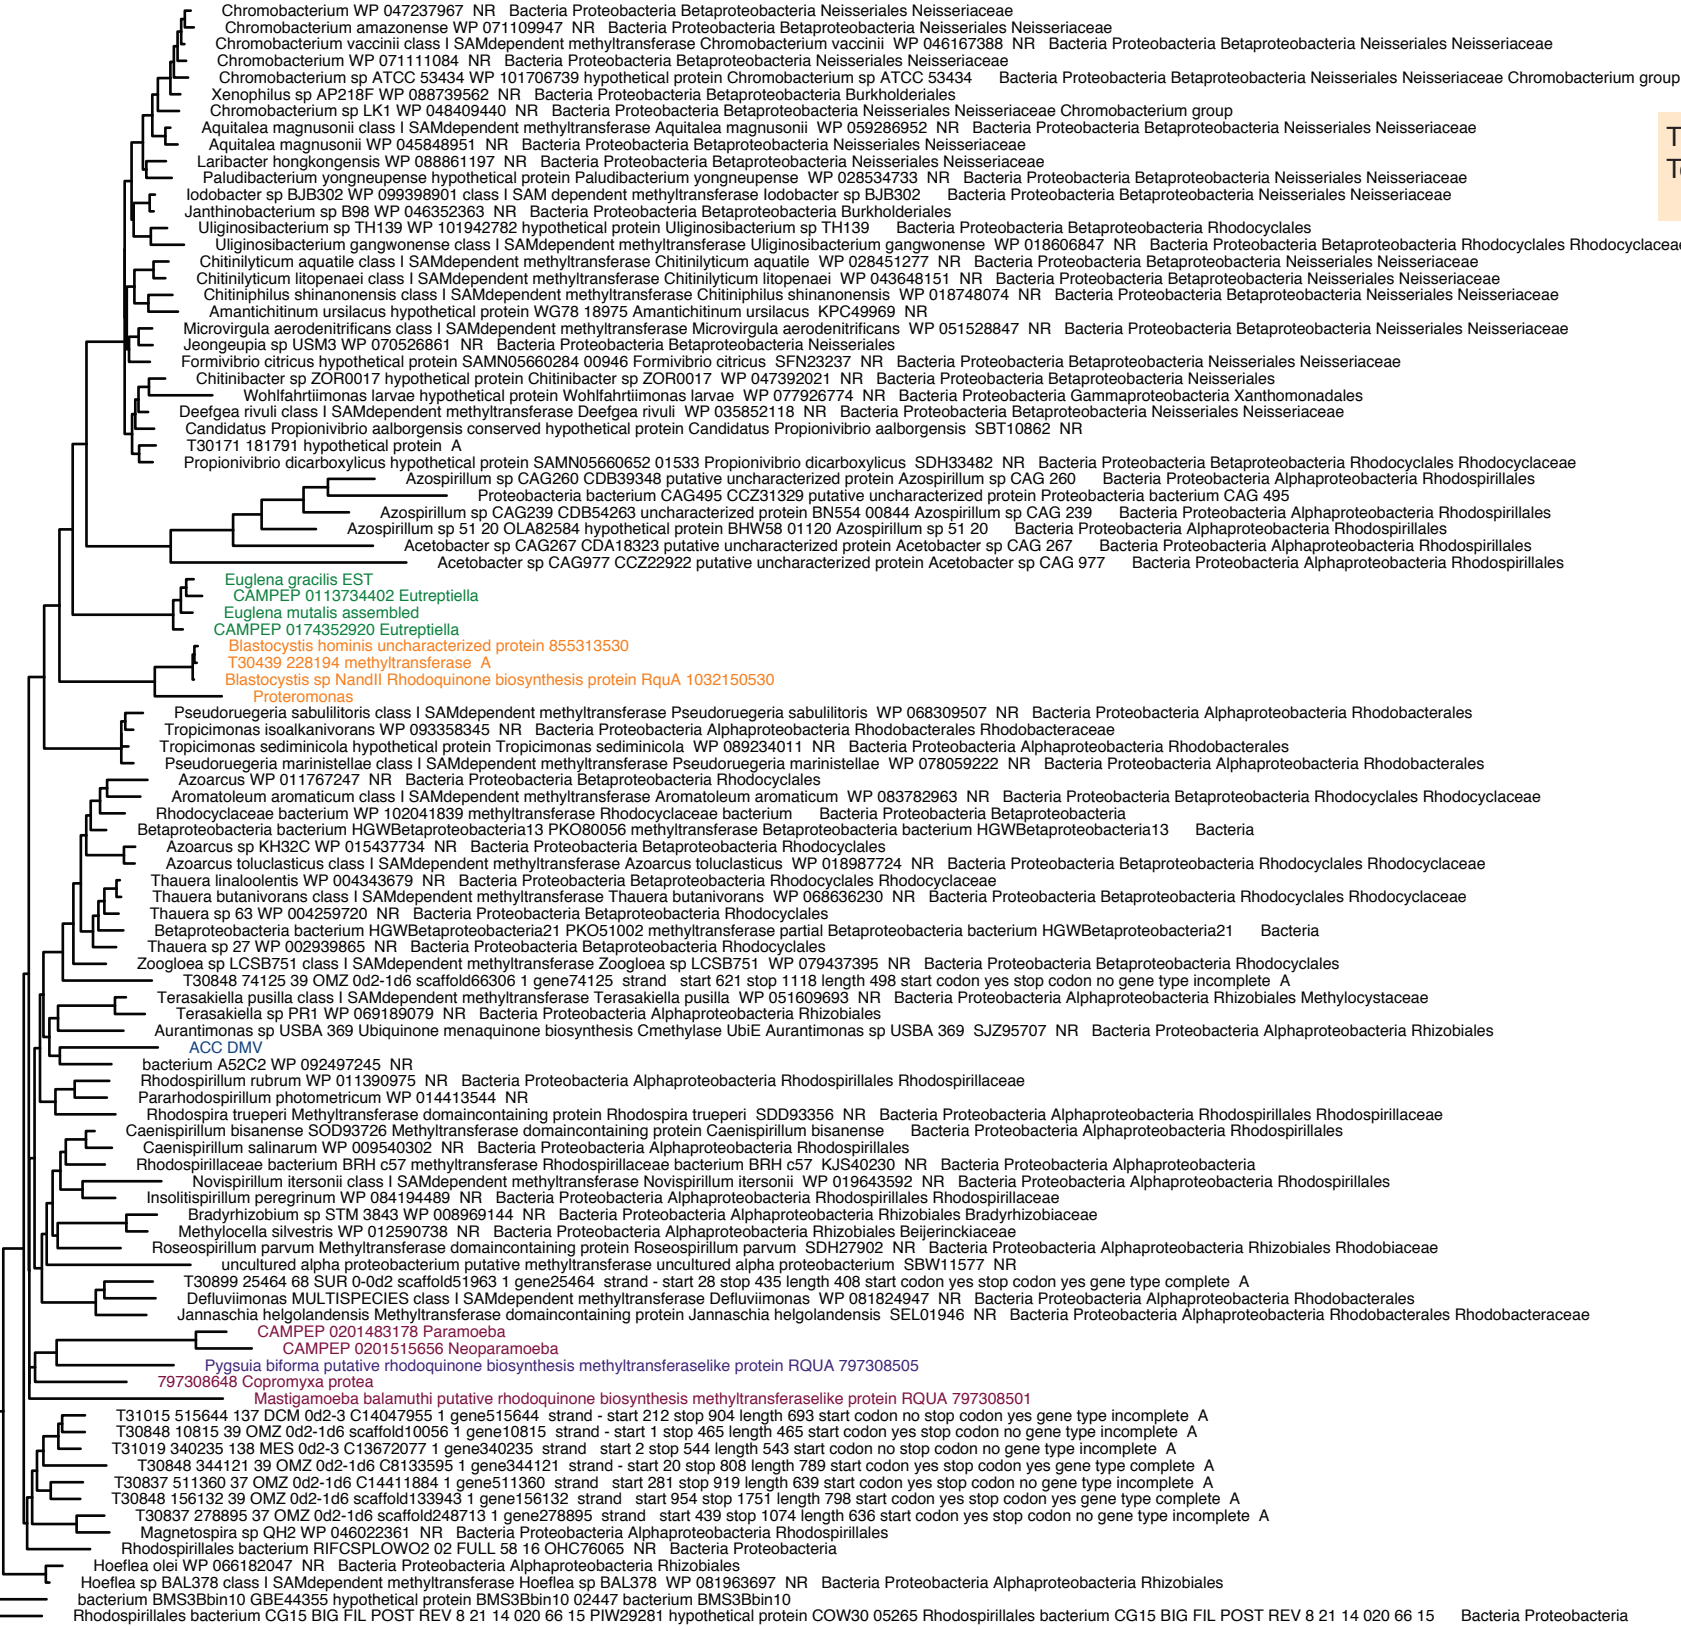

Tree 5 - RQUA Group A dataset  
Topology test: eukaryotes + alphaproteobacteria

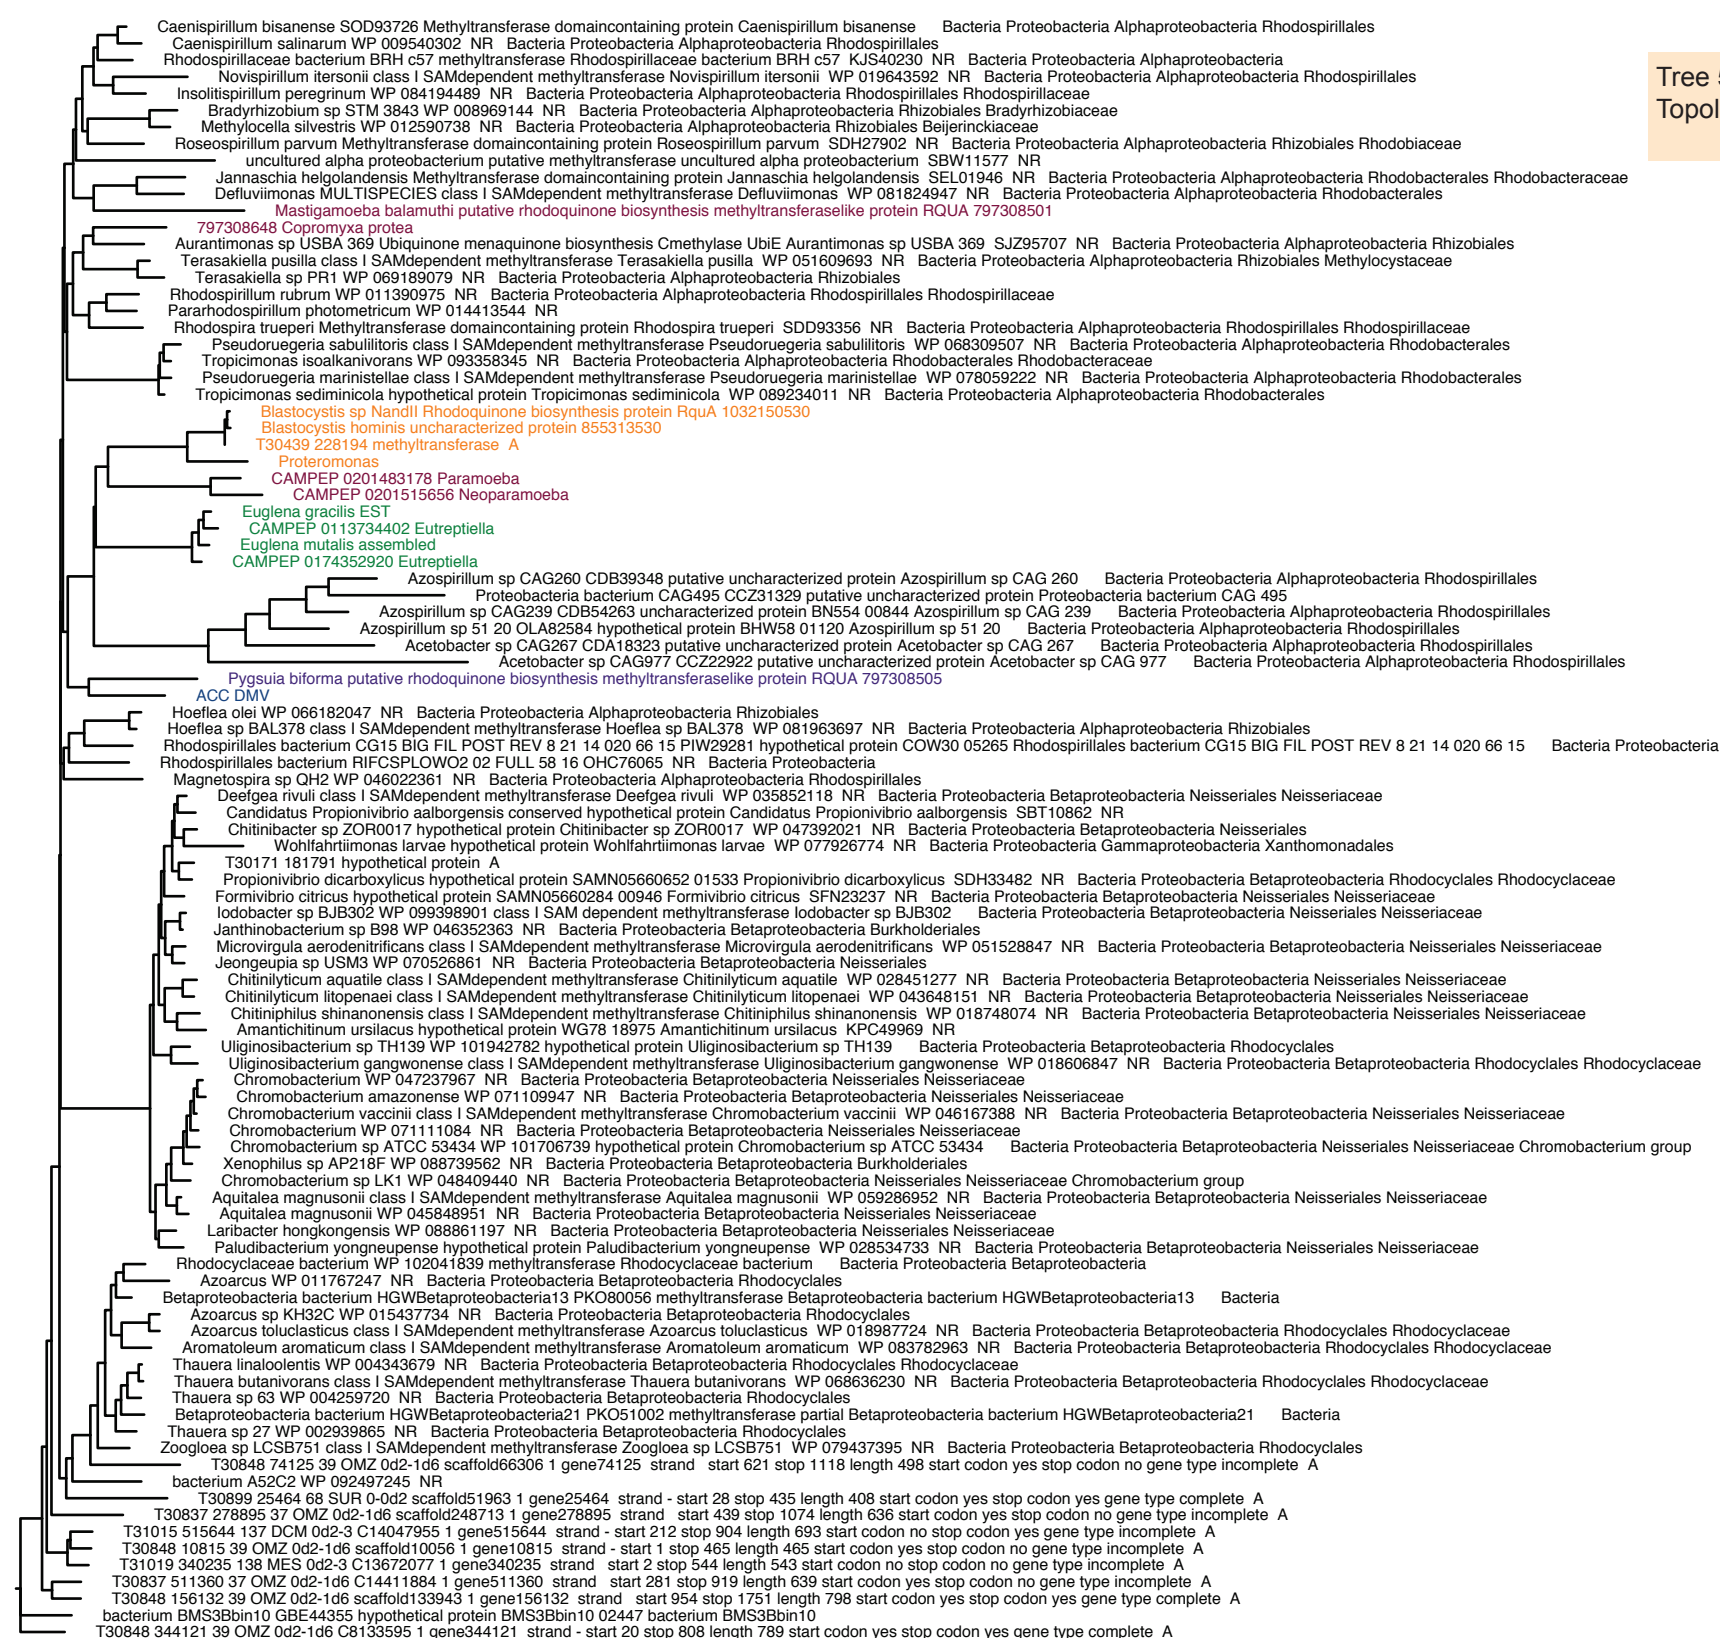

Supplement: supp [file elife-34292-supp-v1.zip]
