# Supplementary material for: Microbial eukaryotes have adapted to hypoxia by horizontal acquisitions of a gene involved in rhodoquinone biosynthesis
Source: eLife. 2018 Apr 26;7:e34292. doi: 10.7554/eLife.34292 (PMC5953543; doi:10.7554/eLife.34292)
Supplement: Supplementary file 1. [file elife-34292-supp1.xlsx]

## Sheet: Contents
Workbook name	Description
Genomes Surveyed	Number of complete genomes and transcriptomes surveyed for RQUA homlogues
HMMsearch	Proteins retrieved using RQUA HMM profile
RQUA and Q-utilizing proteins	Protein accession numbers for eukaryotic proteins related to quinone metabolism and anaerobioisis
Mitochondrial Targeting	Mitochondrial targeting predictions for the eukaryotic proteins
Redox half-reactions	Reduction potenetials for different quinone-utilizing enzymes and their respective references.
Bacterial genes with linkage	Bacterial rqua genes that are genetic neighbours to respiration associated proteins. Genes are ordered based on relative position to the RQUA gene (bold) and sub-organized based on the function of the genes around RQUA (e.g., Cytochrome C).
Bacterial genes without linkage	Bacterial rqua genes that are not adjacent to obvious respiratory components

## Sheet: Genomes Survyed
Eukaryotic Classification	RQUA detected a	NCBI Genomes b	NCIB TSA nr c	MMETSP d
Alveolata	7	105	32	134
Amoebozoa	4	41	10	8
Apusozoa	0	1	0	0
Breviatea	1	1	1	0
Centroheliozoa	0	0	1	0
Cryptophyta	0	8	1	25
Euglenozoa	2 e	55	3	5
Fornicata	0	2	2	0
Glaucocystophyceae	0	4	0	3
Haptophyceae	0	5	2	61
Heterolobosea	0	5	1	2
Jakobida	0	6	0	0
Malawimonadidae	0	2	0	0
Opisthokonta	1	9,240	1395	10
Oxymonadida	0	1	1	0
Parabasalia	0	2	1	0
Rhizaria	4	12	4	21
Rhodophyta	0	124	15	8
Stramenopiles	5	150	49	279
Viridiplantae	0	2,461	499	72
unclassified	0	0	3	19
Multispecies with undefined taxa ID	0	0	82	19
Total	24	12225	2102	647
a Source: this study
b Source: NCBI Taxonomy Browser, selecting “Genomes” - January 28, 2018
c Source NCBI Trace Archive for the transcriptome shotgun assembly database availble at https://www.ncbi.nlm.nih.gov/Traces/wgs/?term=tsa Taxonomy ID were extracted and taxonomy parsed with ete-toolkit. Only non-redundant taxonomy IDs are shown.
d Source: iMicrobe; Taxonomy ID were extracted and taxonomy assigned with ete-toolkit. Only non-redundant taxonomy IDs are shown.
e Three copies were identified in Eutriptiella and 1 in Euglena

## Sheet: PFAM domains
Accession number	Creation Date	Phylogenetic position	PFAM domain
			CMAS	COG2226	COG2226_ur.ma	CSN8_PSD8_EIF3K	MTS	MetW	Methyltransf_11	Methyltransf_12	Methyltransf_23	Methyltransf_25	Methyltransf_31	NodS	RQUA	Ubie_methyltran	adh_short	adh_short_C2
OIN93610.1	2016-11-09	RQUA original	--	5.5e-23	1.2e-15	--	--	--	5.1e-13	7.8e-07	--	6.1e-15	1e-06	--	2.2e-104	2.9e-11	--	--
WP_011465688.1	2013-05-16	RQUA original	--	3.2e-22	6.4e-15	--	--	--	2.9e-14	5.2e-07	1.5e-05	1.5e-15	3.1e-08	2.7e-05	2.3e-104	1.5e-10	--	--
PIQ50613.1	2017-11-14	RQUA original Identical to OIN93610	--	6.1e-23	1.3e-15	--	--	--	5.5e-13	8.4e-07	--	6.5e-15	1.1e-06	--	2.5e-104	3.2e-11	--	--
OIP20041.1	2016-11-09	RQUA original	--	1e-22	1.6e-16	--	--	--	7.8e-14	9.3e-06	--	9.3e-15	7.5e-08	2.4e-07	5.1e-104	1.6e-12	--	--
PIE83306.1	2017-11-03	RQUA new seq	--	4e-24	4.3e-15	--	--	--	2.6e-12	2.4e-06	6.4e-05	2.5e-15	5.2e-07	2.3e-05	5.4e-104	1.1e-13	--	--
PKO61098.1	2017-12-13	RQUA new seq	--	3.6e-20	3.9e-14	--	--	--	1.7e-13	1.3e-06	2.2e-05	3.9e-15	1.4e-07	6.2e-06	5.5e-104	8.1e-12	--	--
PIW10424.1	2017-11-16	RQUA original Identical to OIP20041	--	1.2e-22	1.9e-16	--	--	--	8.4e-14	1e-05	--	9.7e-15	8.5e-08	2.7e-07	6.2e-104	1.9e-12	--	--
OGB50378.1	2016-10-18	RQUA original	--	5.3e-21	3.7e-14	--	--	--	3.2e-13	1.8e-06	--	3.5e-14	3e-07	9.6e-05	9.3e-104	1.5e-11	--	--
OIP19387.1	2016-11-09	RQUA original	--	4e-20	9.2e-14	--	--	--	2.5e-12	1.3e-05	--	2.5e-14	9.6e-08	1.1e-05	1.3e-103	5.8e-12	--	--
OQW86081.1	2017-04-10	RQUA original	--	6.7e-22	8.3e-16	--	--	--	3.1e-13	1.3e-06	--	5.8e-15	9e-07	6.1e-06	1.5e-102	2.1e-11	--	--
OGA34772.1	2016-10-18	RQUA original	--	1.8e-23	5.4e-14	--	--	--	6e-14	2.3e-07	1.4e-06	8.8e-15	9.6e-08	--	8.7e-102	4e-10	--	--
WP_078364963.1	2017-03-06	RQUA original	--	1e-21	2.5e-14	--	--	--	1e-12	5.9e-07	--	2e-14	5e-06	6.3e-05	1.1e-101	1.2e-10	--	--
CDH44281.1	2014-01-29	RQUA original	--	1.4e-24	9.5e-15	--	--	--	7.5e-10	--	--	1.2e-13	--	--	1.4e-101	8.7e-12	--	--
WP_082161154.1	2017-04-10	RQUA original	--	1.1e-22	2.2e-16	--	6.6e-05	--	3.5e-15	2.8e-08	7.8e-07	2.2e-17	1.9e-10	1.8e-07	2.6e-101	3.8e-12	--	--
CRH06342.1	2017-03-06	RQUA original	--	8.3e-25	3.2e-16	--	--	--	5.2e-13	2.1e-08	4.3e-07	5e-15	4.8e-08	--	7.5e-101	1.3e-12	--	--
APW48119.1	2017-01-18	RQUA original identical to WP_083633809.1	--	5.5e-21	5e-14	--	--	--	3.1e-12	2.2e-06	--	5e-14	1.6e-05	2.1e-06	1.9e-100	1.2e-10	--	--
WP_083633809.1	2017-04-16	RQUA original	--	6.6e-21	5.9e-14	--	--	--	3.4e-12	2.5e-06	--	5.6e-14	1.9e-05	2.4e-06	2.4e-100	1.4e-10	--	--
OGA21977.1	2016-10-18	RQUA original	--	1.1e-24	1.8e-14	--	--	--	3.6e-14	5.5e-05	1.5e-06	5.3e-17	2.5e-06	2.8e-07	2.9e-100	1.5e-11	--	--
OLP07470.1	2017-01-06	RQUA original	--	4.7e-21	4.3e-14	--	--	--	2.8e-12	2e-06	--	4.5e-14	1.4e-05	1.8e-06	3.3e-100	1.1e-10	--	--
PIZ22147.1	2017-11-16	RQUA original Identical to OIP13158	--	7.6e-19	1.6e-13	--	--	--	8.9e-13	6.3e-07	--	1.1e-13	6e-05	2.7e-05	3.7e-100	1e-08	--	--
WP_066879660.1	2016-08-18	RQUA original	--	8.2e-25	1.6e-17	--	--	--	5.5e-12	1.7e-05	--	2.4e-15	3.2e-06	--	4.9e-100	2e-11	--	--
OIP13158.1	2016-11-09	RQUA original	--	5.5e-19	1.2e-13	--	--	--	7e-13	5.1e-07	--	8.3e-14	4.6e-05	2.1e-05	9e-100	7.7e-09	--	--
WP_096449698.1	2017-09-27	RQUA new seq	--	1.4e-27	1.7e-16	--	--	--	4e-12	--	--	3.3e-15	5.2e-05	--	9.2e-100	5.6e-11	--	--
KPK20652.1	2015-09-30	RQUA original	--	1.1e-22	1.2e-15	--	--	--	1.1e-13	1.9e-05	1.1e-05	9.5e-16	6.3e-07	1.1e-07	1.5e-98	7.3e-12	--	--
OGA07543.1	2016-10-18	RQUA original	--	6e-21	7e-13	--	--	--	4.2e-10	1.8e-05	1e-06	5.1e-12	--	--	1.8e-98	2e-10	--	--
OGA13126.1	2016-10-18	RQUA original	--	6.7e-20	3.6e-12	--	--	--	1.5e-10	9.1e-05	--	1e-11	--	--	1.8e-98	6.4e-10	--	--
OGA02013.1	2016-10-18	RQUA original	--	1.3e-21	9.6e-13	--	--	--	2.9e-12	7.8e-05	4.9e-06	4.5e-12	--	--	2e-98	5.1e-10	--	--
OFZ85946.1	2016-10-18	RQUA original identical to OGA07543.1	--	3.7e-20	3e-12	--	--	--	2.7e-09	--	6.8e-06	2.1e-11	--	--	3.9e-98	6.1e-10	--	--
WP_085442012.1	2017-04-27	RQUA original	--	2.3e-17	2.2e-12	--	--	--	1.4e-09	--	--	3.9e-11	--	--	1.1e-97	4.8e-08	--	--
OSM04871.1	2017-04-25	RQUA original identical to WP_085442012.1	--	1.6e-17	1.6e-12	--	--	--	1.1e-09	--	--	3e-11	--	--	1.9e-97	3.5e-08	--	--
CAX83768.1	2009-06-10	RQUA original	--	3.2e-19	1e-12	--	--	--	6.2e-13	1.4e-05	--	1.1e-14	2.6e-05	--	2.5e-97	7e-10	--	--
WP_011713845.1	2013-05-16	RQUA original	--	3e-22	4.1e-15	--	--	--	4.5e-09	--	--	5.7e-11	--	--	8.5e-97	1.3e-12	--	--
WP_083218417.1	2017-04-13	RQUA original	--	3.1e-23	3.6e-13	--	--	--	2e-10	--	--	1.4e-12	7.1e-06	1.5e-06	1.4e-96	6.5e-10	--	--
WP_088709583.1	2017-07-01	RQUA original	--	4.4e-24	1.7e-15	--	--	--	7.7e-11	2.3e-05	--	5e-13	1.3e-07	--	4.3e-96	6.6e-12	--	--
ODB85269.1	2016-08-23	RQUA original identical to WP_083218417	--	2.8e-23	2.8e-13	--	--	--	1.7e-10	--	--	1.1e-12	6.5e-06	1.2e-06	4.1e-95	5.1e-10	--	--
KPK33109.1	2015-09-30	RQUA original	--	1.4e-24	5.3e-15	--	--	--	4.2e-11	8.2e-07	1.5e-06	2.9e-13	8.4e-07	--	5.1e-95	2.2e-12	--	--
OMJ89614.1	2017-01-25	RQUA original identical to OMJ68008	--	6.2e-26	6.5e-18	--	--	--	3.3e-15	1.2e-09	5.5e-06	3.1e-16	2.6e-11	6.7e-06	1e-94	1.5e-13	--	--
WP_089727270.1	2017-07-28	RQUA original	--	2.8e-18	5.7e-09	--	--	--	9.3e-09	9.7e-05	--	2e-10	--	--	1e-94	4e-05	--	--
OMJ68008.1	2017-01-25	RQUA original	--	4e-26	6.4e-18	--	--	--	3.3e-15	1.2e-09	5.4e-06	3.1e-16	2.7e-11	6.7e-06	1.1e-94	1.5e-13	--	--
OGS90730.1	2016-10-20	RQUA original	--	2.5e-20	4.4e-11	--	--	--	1.7e-10	--	--	9.9e-13	--	--	1.4e-94	1.3e-10	--	--
WP_076022161.1	2017-01-19	RQUA original	--	1.6e-21	7.1e-11	--	--	--	1.8e-09	7.1e-06	2.7e-07	2.4e-11	--	--	1.6e-94	6.4e-11	--	--
WP_088284080.1	2017-06-22	RQUA original	--	4.4e-22	3.1e-14	--	--	--	2.2e-12	2.6e-06	--	4.2e-12	5.8e-05	--	1.6e-94	2.9e-10	--	--
SEN35040.1	2016-10-29	RQUA original	--	2e-21	5.4e-13	--	--	--	5.1e-11	--	--	1.7e-12	--	--	5e-94	2.2e-12	--	--
EXI67882.1	2014-03-03	RQUA original identical to EXI86820.1	--	1.9e-18	2e-12	--	--	--	4.6e-10	--	4.4e-05	5.3e-12	--	--	5.5e-94	1.8e-10	--	--
WP_091814982.1	2017-07-29	RQUA original identical to SEN35040	--	2.4e-21	6.4e-13	--	--	--	5.9e-11	--	--	2e-12	--	--	6.3e-94	2.6e-12	--	--
EXI74003.1	2014-03-03	RQUA original identical to EXI86820.1	--	3.9e-18	3.9e-12	--	--	--	5.2e-11	--	--	5.1e-12	--	--	1.5e-93	1.1e-10	--	--
WP_082679741.1	2017-04-11	RQUA original	--	1.6e-23	1e-12	--	--	--	2.8e-09	2.1e-05	--	2.9e-11	--	--	1.6e-93	3.4e-10	--	--
WP_015765501.1	2013-05-20	RQUA original	--	7.3e-21	8.8e-13	--	--	--	3.8e-11	--	--	7.7e-13	--	--	1.9e-93	8.9e-12	--	--
ALT79593.1	2015-12-22	RQUA origianl identical to WP_082679741	--	1.1e-23	7.1e-13	--	--	--	2.2e-09	1.6e-05	--	2.2e-11	--	--	2.8e-93	2.4e-10	--	--
OGA02012.1	2016-10-18	RQUA original	--	2.5e-22	6.5e-15	--	--	--	9.6e-13	4.2e-06	--	3.5e-14	1.1e-05	1.5e-05	4.7e-93	8.5e-12	--	--
EXI86820.1	2014-03-03	RQUA original	--	1.3e-16	5.2e-12	--	--	--	5.5e-10	--	--	1.5e-11	--	--	8e-93	3.5e-10	--	--
KFB74202.1	2014-07-28	RQUA original	--	7.8e-19	6.6e-12	--	--	--	3.4e-11	--	--	6.8e-12	--	--	1e-92	1.6e-09	--	--
SNB78556.1	2017-06-23	RQUAoriginal identical to WP_088521682	--	2.2e-25	2.4e-15	--	--	--	7.6e-13	1.3e-05	5.6e-07	3.6e-13	--	--	1.5e-92	3e-13	--	--
WP_088521682.1	2017-06-28	RQUA original	--	3.1e-25	3.4e-15	--	--	--	9.2e-13	1.4e-05	7.5e-07	4.4e-13	--	--	2.3e-92	4.2e-13	--	--
WP_011390975.1	2013-05-16	RQUA original	--	8.1e-12	1.6e-06	--	--	--	1.2e-06	1.6e-05	4.7e-08	9.9e-10	1.7e-06	--	2.6e-92	--	--	--
WP_008382636.1	2013-05-10	RQUA original	--	5.7e-25	1.4e-10	--	--	--	4.4e-11	2.1e-05	5.6e-07	1.1e-13	--	--	3.4e-92	1.1e-11	--	--
WP_009548819.1	2013-05-11	RQUA original	--	2.2e-23	7.7e-13	--	--	--	6e-10	--	--	5.5e-11	--	--	3.6e-92	2.4e-08	--	--
KFB76907.1	2014-07-28	RQUA original identical to KFB74202	--	1.2e-18	1.2e-11	--	--	--	2.1e-10	--	--	5.8e-11	--	--	4.4e-92	1.4e-09	--	--
KFB66839.1	2014-07-28	RQUA original	--	2e-18	1.3e-11	--	--	--	2.2e-10	--	--	5.9e-11	--	--	9.9e-92	2.2e-09	--	--
WP_012349375.1	2013-05-16	RQUA original	--	2.3e-27	4.7e-16	--	1.2e-05	--	7.2e-14	8.9e-10	--	3.5e-14	6e-06	--	1.6e-91	7.3e-13	--	--
SBT07692.1	2016-06-16	RQUA original identical to WP_015765501	--	1.6e-18	6.7e-12	--	--	--	2.2e-10	--	--	6.9e-13	--	--	2.2e-91	4.3e-10	--	--
EXI89591.1	2014-03-03	RQUA original	--	3.6e-19	1.1e-12	--	--	--	9.7e-11	--	--	1.8e-11	--	--	4.2e-91	3e-11	--	--
WP_051609693.1	2015-08-16	RQUA original	--	2.6e-14	4.4e-07	--	--	--	1.2e-05	6.9e-07	2.6e-07	3.4e-10	3e-06	8.9e-05	8.7e-91	7.8e-08	--	--
AKA62178.1	2015-08-01	RQUA original	--	1.2e-24	7e-17	--	7.8e-05	--	2.4e-14	2.8e-11	1.2e-09	3.7e-16	6.5e-12	--	2.2e-90	3.7e-14	--	--
WP_097278957.1	2017-10-12	RQUA origianl identical to SOD93726	--	2e-11	2.1e-06	--	--	--	--	5.2e-06	7e-06	5.8e-08	9.8e-05	--	2.6e-90	8.2e-06	--	--
SOD93726.1	2017-09-19	RQUA new seq	--	2.6e-11	2.6e-06	--	--	--	--	6e-06	8.1e-06	6.5e-08	--	--	3.3e-90	9.9e-06	--	--
WP_047392021.1	2015-06-17	RQUA original	--	2.5e-11	2.8e-05	--	--	--	--	2e-06	5.7e-07	3.3e-08	1.4e-07	--	3.3e-90	--	--	--
OYY43933.1	2017-08-16	RQUA new seq	--	2e-20	3.3e-12	--	--	--	1.2e-12	1.2e-07	4.6e-09	7.7e-14	3.8e-07	2.4e-05	3.5e-90	7.9e-12	--	--
WP_028449510.1	2014-06-13	RQUA original identical to WP_047392021	--	2.7e-11	3.4e-05	--	--	--	--	3e-06	5.4e-07	4.1e-08	2.8e-07	--	4e-90	--	--	--
WP_070526861.1	2016-10-26	RQUA original	--	9.3e-09	--	--	--	--	--	--	2.4e-06	9.3e-07	--	--	6.1e-90	--	--	--
WP_051528847.1	2015-08-16	RQUA original	--	1.9e-09	--	--	--	--	--	9.8e-07	1.8e-05	1.5e-07	--	--	6.8e-90	--	--	--
ETO28810.1	2013-12-30	RQUA original	--	1.6e-07	--	--	--	--	9.5e-05	--	--	2.9e-05	--	--	1.1e-89	--	--	--
WP_035852118.1	2014-12-24	RQUA original	--	1.1e-08	--	--	--	--	--	--	--	4.6e-05	--	--	1.4e-89	--	--	--
WP_046352363.1	2015-04-22	RQUA original	--	3.4e-14	2.9e-06	--	--	--	--	3.9e-06	1.9e-06	4.1e-08	8.2e-07	--	1.5e-89	--	--	--
WP_091936206.1	2017-07-29	RQUA original	--	3.9e-11	--	--	--	--	--	--	--	5.3e-05	--	--	1.5e-89	--	--	--
WP_028451277.1	2014-06-13	RQUA original	--	5e-09	--	--	--	--	--	--	--	2.6e-06	--	--	1.8e-89	--	--	--
OGZ98428.1	2016-10-21	RQUA original	--	2.8e-22	6.5e-13	--	--	--	7.6e-13	--	--	8.6e-13	--	--	1.9e-89	1.9e-10	--	--
WP_008382635.1	2013-05-10	RQUA original	--	3.5e-30	1.3e-14	--	--	--	2.1e-15	4.4e-08	3e-05	2.3e-16	2.8e-06	1.7e-05	3.1e-89	7.3e-16	--	--
WP_091192036.1	2017-07-29	RQUA original	--	2.4e-10	--	--	--	--	--	6.3e-07	9.7e-05	1.6e-08	5.2e-06	--	3.4e-89	--	--	--
WP_018606847.1	2013-06-29	RQUA original	--	9.1e-14	--	--	--	--	--	2.1e-06	1.5e-05	1.3e-09	4.4e-06	--	3.7e-89	--	--	--
WP_021477533.1	2013-09-22	RQUA original identical WP_047237967	--	8.9e-11	--	--	--	--	--	--	8.2e-06	1.2e-07	9.2e-05	--	4.4e-89	--	--	--
WP_081756179.1	2017-04-09	RQUA original identical to CDH44281.1	--	9.7e-25	5.6e-15	--	--	--	5e-10	--	--	7.8e-14	6.1e-05	--	5.4e-89	5.1e-12	--	--
WP_092782477.1	2017-07-29	RQUA original	--	9e-11	1.6e-05	--	--	--	2.2e-06	4.3e-06	5.4e-05	1.5e-09	1.6e-05	--	6.2e-89	--	--	--
WP_048404498.1	2015-07-01	RQUA original identical to	--	1.9e-09	--	--	--	--	--	--	--	2.9e-07	--	--	8.6e-89	--	--	--
WP_013417803.1	2013-05-18	RQUA original	--	2.7e-24	1.4e-13	--	--	--	9.7e-13	6.2e-06	8.5e-06	1.9e-13	--	--	1.1e-88	4.3e-13	--	--
WP_099398901.1	2017-10-31	RQUA new seq	--	1.6e-11	4.1e-05	--	--	--	--	1.4e-05	2.3e-05	1.2e-06	4.8e-05	--	1.3e-88	--	--	--
WP_081527758.1	2017-04-08	RQUA original identical to	--	1.9e-09	--	--	--	--	--	--	2.5e-05	4.7e-07	--	--	1.7e-88	--	--	--
WP_079437395.1	2017-03-17	RQUA original	--	1.8e-13	4.2e-05	--	--	--	3.2e-06	7.5e-06	2.8e-06	6e-09	--	--	1.8e-88	--	--	--
WP_012697811.1	2013-05-17	RQUA original identical to	--	1.9e-06	--	--	--	--	--	--	--	--	--	--	2e-88	--	--	--
WP_088861197.1	2017-07-07	RQUA original	--	1.9e-06	--	--	--	--	--	--	--	--	--	--	2.2e-88	--	--	--
WP_076226594.1	2017-01-20	RQUA original identical to	--	4.2e-09	--	--	--	--	--	--	2.5e-05	4.7e-07	--	--	2.8e-88	--	--	--
WP_099426489.1	2017-11-01	RQUA new seq	--	4e-09	--	--	--	--	--	--	2.6e-05	4.7e-07	--	--	2.8e-88	--	--	--
SNT09047.1	2017-07-13	?	--	7.5e-11	--	--	--	--	4.2e-07	2.8e-08	4.4e-07	1.1e-08	--	--	3e-88	--	--	--
WP_047237967.1	2015-06-08	RQUA original	--	6e-11	--	--	--	--	--	--	1.5e-05	1.9e-08	--	--	3e-88	--	--	--
WP_046158899.1	2015-04-10	RQUA origianl identical to WP_046167388	--	1.9e-10	--	--	--	--	--	--	3.3e-05	5.1e-07	--	--	3.6e-88	--	--	--
WP_045052231.1	2015-03-17	?	--	1.9e-09	--	--	--	--	--	--	2.5e-05	4.7e-07	--	--	3.8e-88	--	--	--
WP_047248533.1	2015-06-08	RQUA origianl identical to WP_046167388	--	1e-10	--	--	--	--	--	--	2.2e-05	2.7e-08	--	--	3.8e-88	--	--	--
KJS40230.1	2015-03-24	RQUA original	--	8.6e-09	--	--	--	--	--	--	--	3e-05	--	--	4e-88	--	--	--
WP_014413544.1	2013-05-19	RQUA original	--	1.8e-09	--	--	--	--	--	--	4.1e-06	3.4e-06	--	--	4e-88	--	--	--
SBT10862.1	2016-06-16	RQUA original	--	1e-10	--	--	--	--	--	3.1e-05	--	4.7e-06	2.1e-06	--	4.1e-88	--	--	--
WP_081543599.1	2017-04-08	?	--	2e-09	--	--	--	--	--	--	2.6e-05	4.8e-07	--	--	4.1e-88	--	--	--
WP_046167388.1	2015-04-10	RQUA original	--	5.4e-10	--	--	--	--	--	--	3.2e-05	5.1e-07	--	--	4.2e-88	--	--	--
WP_043648151.1	2015-02-24	RQUA original	--	3.3e-09	--	--	--	--	--	2.6e-05	7.2e-05	3.7e-08	1.6e-05	--	5.3e-88	--	--	--
WP_070979823.1	2016-10-30	RQUA origianl identical to WP_046167388	--	5.4e-10	--	--	--	--	--	--	3.4e-05	5.1e-07	--	--	5.8e-88	--	--	--
WP_043612875.1	2015-02-24	?	--	2.4e-09	--	--	--	--	--	--	2.6e-05	6.4e-07	--	--	5.9e-88	--	--	--
WP_089234011.1	2017-07-21	RQUA original	--	1.4e-10	--	--	--	--	5.7e-07	4.7e-08	7.8e-07	1.5e-08	--	--	6e-88	--	--	--
WP_087697699.1	2017-06-10	?	--	2e-09	--	--	--	--	--	--	2.9e-05	4.6e-07	--	--	6.3e-88	--	--	--
WP_081571774.1	2017-04-08	?	--	4.2e-09	--	--	--	--	--	--	2.7e-05	4.8e-07	--	--	6.6e-88	--	--	--
WP_037240088.1	2014-12-24	RQUA origianl identical to WP_013417803	--	1.1e-23	5.6e-13	--	--	--	2.5e-11	6.2e-05	--	1.8e-12	--	--	1e-87	9.7e-12	--	--
WP_043577050.1	2015-02-24	RQUA origianl identical to WP_046167388	--	7e-11	--	--	--	--	--	--	2.5e-05	4.4e-08	--	--	1.1e-87	--	--	--
WP_011134439.1	2013-05-15	?	--	1.6e-08	--	--	--	--	--	--	4.8e-05	4.6e-07	--	--	1.4e-87	--	--	--
OGG86284.1	2016-10-19	RQUA original	--	7.1e-24	7.3e-13	--	--	--	4.2e-14	8.1e-06	1.6e-05	5.5e-14	--	5e-05	1.6e-87	2.6e-12	--	--
WP_101706739.1	2018-01-10	RQUA new seq	--	5.6e-11	--	--	--	--	--	--	--	3.4e-07	--	--	1.7e-87	--	--	--
WP_059286952.1	2016-01-21	RQUA original	--	1.7e-12	4e-05	--	--	--	--	--	--	3.3e-08	2.5e-05	--	2.2e-87	--	--	--
WP_012590738.1	2013-05-17	RQUA original	--	4.5e-13	1.9e-07	--	--	--	--	--	--	2e-05	--	--	2.5e-87	1.7e-06	--	--
WP_043621044.1	2015-02-24	RQUA original identical to WP_071109947	--	9.2e-13	9.4e-06	--	--	--	5.4e-05	5.3e-06	9.4e-06	5.1e-09	8.2e-06	--	2.9e-87	--	--	--
WP_009540302.1	2013-05-11	RQUA original	--	8.6e-11	--	--	--	--	--	5.7e-05	5e-08	9.5e-08	2.5e-05	--	5.2e-87	--	--	--
WP_078059222.1	2017-03-02	RQUA original	--	1.3e-10	--	--	--	--	1.3e-05	4.5e-07	1e-05	1.2e-06	--	--	5.7e-87	--	--	--
WP_071109947.1	2016-10-30	RQUA original	--	5.1e-12	4.3e-05	--	--	--	--	5.1e-05	--	4.1e-08	5.1e-05	--	7.2e-87	--	--	--
WP_101942782.1	2018-01-11	RQUA original	--	3.2e-08	--	--	--	--	--	--	--	--	--	--	9.3e-87	--	--	--
WP_092497245.1	2017-07-29	RQUA original	--	4.2e-10	6.9e-06	--	--	--	--	1.2e-06	--	4.9e-08	--	--	9.6e-87	--	--	--
WP_071111084.1	2016-10-30	RQUA original	--	4.2e-11	--	--	--	--	6.3e-05	4.3e-05	1.3e-05	1.6e-08	--	--	1.1e-86	--	--	--
WP_048414101.1	2015-07-01	RQUA original identical to WP_048409440.1	--	7.3e-16	3.5e-07	--	--	--	6.4e-06	5.9e-06	9.3e-06	4.7e-10	3.2e-06	--	1.5e-86	1.8e-06	--	--
WP_019104209.1	2013-06-29	RQUA original identical to WP_048409440.1	--	1.1e-15	2.7e-07	--	--	--	4.8e-06	2.8e-06	8.6e-06	1.3e-09	2e-06	--	1.8e-86	1.1e-06	--	--
WP_043637131.1	2015-02-24	RQUA original identical to WP_048409440.1	--	1.9e-15	5.1e-07	--	--	--	4.4e-06	3.7e-06	1e-05	1.4e-09	5.8e-06	--	1.8e-86	1.1e-06	--	--
WP_089085170.1	2017-07-15	RQUA original identical to WP_045848951	--	3.7e-10	--	--	--	--	--	--	--	6.2e-07	--	--	1.9e-86	--	--	--
WP_068309507.1	2016-08-19	RQUA original	--	5.4e-12	--	--	--	--	--	2.3e-06	5.2e-05	1.7e-06	--	--	2.1e-86	--	--	--
WP_069189079.1	2016-09-01	RQUA original	--	1.1e-14	2.5e-06	--	--	--	6.6e-05	--	3.7e-06	6.7e-09	--	--	2.3e-86	2.7e-05	--	--
WP_002931509.1	2013-05-06	RQUA original identical to WP_002939865	--	7e-14	1.3e-05	--	--	--	2.4e-08	--	7.4e-05	1.8e-10	--	--	2.6e-86	--	--	--
WP_002939865.1	2013-05-06	RQUA original	--	9.2e-14	1.8e-05	--	--	--	2.4e-08	--	7.5e-05	1.8e-10	--	--	3.3e-86	--	--	--
WP_048409440.1	2015-07-01	RQUA original	--	8.5e-15	4.5e-06	--	--	--	5.7e-05	3e-05	6.8e-05	5.3e-09	6.7e-06	--	3.6e-86	1.4e-06	--	--
OGG52018.1	2016-10-19	RQUA original	--	1.6e-22	1.9e-08	--	--	--	7.3e-14	1.9e-05	9.6e-06	8.8e-12	--	--	4.1e-86	1.1e-09	--	--
WP_028534733.1	2014-06-13	RQUA original	--	9.6e-10	--	--	--	--	--	--	--	4e-06	--	--	4.1e-86	--	--	--
WP_008969144.1	2013-05-10	RQUA original	--	2.2e-11	5.2e-05	--	--	--	--	2.2e-06	3.9e-07	1.4e-07	--	--	4.8e-86	1.5e-05	--	--
WP_093156193.1	2017-07-29	RQUA original identical to WP_068309507	--	1.4e-11	--	--	--	--	--	6.2e-06	7.8e-05	5.3e-06	--	--	5.6e-86	--	--	--
KKW06214.1	2015-05-07	RQUA original identical to CDH44281.1	--	4.1e-23	1.1e-12	--	--	--	7e-13	--	--	1.8e-12	--	--	5.8e-86	5.1e-11	--	--
WP_083459383.1	2017-04-16	RQUA original identical to KPC49969.1	--	4e-09	--	--	--	--	--	5.7e-05	4.4e-05	4e-07	--	--	5.8e-86	--	--	--
KPC49969.1	2015-09-18	RQUA original	--	4.8e-09	--	--	--	--	--	6.3e-05	5.1e-05	4.6e-07	--	--	7.1e-86	--	--	--
WP_004343679.1	2013-05-07	RQUA original	--	7.3e-11	--	--	--	--	1.7e-05	1.5e-05	2.5e-07	2.7e-10	--	--	7.6e-86	--	--	--
WP_093358345.1	2017-07-29	RQUA original	--	4.8e-08	--	--	--	--	5.3e-05	8.4e-08	1e-05	1e-07	--	--	7.7e-86	--	--	--
WP_062790948.1	2016-03-29	RQUA original identical to WP_045848951	--	8.2e-09	--	--	--	--	--	--	--	5.6e-06	--	--	8.5e-86	--	--	--
WP_078707909.1	2017-03-10	RQUA original identical to SJZ95707.1	--	3.1e-09	--	--	--	--	1.9e-05	1.8e-05	--	4.4e-08	2.4e-05	--	9.2e-86	--	--	--
WP_045848951.1	2015-03-31	RQUA original	--	6.9e-09	--	--	--	--	--	--	--	5.7e-06	--	--	9.7e-86	--	--	--
SJZ95707.1	2017-03-04	RQUA original	--	3.5e-09	--	--	--	--	2e-05	2e-05	--	4.7e-08	2.7e-05	--	1.1e-85	--	--	--
WP_046022361.1	2015-04-02	RQUA original	--	9e-10	--	--	--	--	--	--	--	3e-07	--	--	1.1e-85	--	--	--
WP_077926774.1	2017-02-27	RQUA original	--	1.2e-10	--	--	--	--	--	9.7e-06	5.3e-05	1.2e-07	2.8e-08	--	1.1e-85	--	--	--
WP_081548439.1	2017-04-08	RQUA original identical to WP_048409440.1	--	9.8e-15	9.9e-07	--	--	--	2.4e-05	1.9e-05	--	7.5e-09	1.1e-05	--	1.1e-85	2.4e-06	--	--
WP_068636230.1	2016-08-19	RQUA original	--	1.3e-11	--	--	--	--	5.3e-06	2.8e-06	5.7e-07	3.2e-10	--	--	2e-85	--	--	--
PKO80056.1	2017-12-13	RQUA new seq	--	7.2e-11	--	--	--	--	1.3e-06	1.4e-06	3.2e-08	4.7e-10	--	7.9e-06	3.1e-85	--	--	--
WP_076600077.1	2017-01-21	RQUA original to WP_018987724.1	--	1.4e-10	--	--	--	--	3.6e-06	--	3.4e-08	7.8e-09	--	--	3.6e-85	--	--	--
PLX75433.1	2018-01-09	?	--	7e-11	--	--	--	--	9.8e-07	1.2e-06	5.4e-08	3.6e-10	--	3.2e-05	4.5e-85	--	--	--
WP_084194489.1	2017-04-17	RQUA original	--	3.5e-10	2.3e-05	--	--	--	1.4e-05	5.2e-07	2e-05	1.7e-08	--	--	5.2e-85	--	--	--
WP_018987724.1	2013-06-29	RQUA original	--	6.4e-10	--	--	--	--	9.2e-06	--	3e-06	3.5e-08	9.6e-05	--	1.1e-84	--	--	--
WP_019643592.1	2013-06-29	RQUA original	--	8e-10	--	--	--	--	--	--	--	3.2e-08	--	--	1.2e-84	--	--	--
WP_005881605.1	2013-05-08	RQUA original	--	4.3e-44	4.9e-15	--	--	--	1.6e-12	3e-07	--	1.4e-15	--	--	1.5e-84	8.3e-14	--	--
WP_050417618.1	2015-08-07	RQUA original to WP_018987724.1	--	2.3e-09	--	--	--	--	6.3e-05	--	4.1e-07	2.4e-08	--	--	2e-84	--	--	--
WP_018748074.1	2013-06-29	RQUA original	--	1.4e-05	--	--	--	--	--	--	--	--	--	--	2.4e-84	--	--	--
WP_015437734.1	2013-05-19	RQUA original	--	1e-09	--	--	--	--	1.2e-05	2e-05	1.4e-08	1.9e-09	5.4e-05	--	2.5e-84	--	--	--
OHC76065.1	2016-10-21	RQUA original	--	2.1e-08	--	--	--	--	--	--	--	--	--	--	3.3e-84	--	--	--
WP_066182047.1	2016-08-18	RQUA original	--	1.5e-11	--	--	--	--	--	--	6.7e-07	7.3e-06	--	--	4e-84	--	--	--
WP_088739562.1	2017-07-03	RQUA original	--	3.4e-09	--	--	--	--	--	--	--	9.7e-06	--	--	4.5e-84	--	--	--
KDB04696.1	2014-05-09	RQUA original identical to WP_081824947	--	1.9e-13	--	--	--	--	3.9e-05	3.3e-05	4.3e-09	1.7e-08	--	--	7.5e-84	--	--	--
WP_005877878.1	2013-05-08	RQUA original	--	3.6e-34	3.9e-14	--	--	--	1e-11	1.8e-07	--	2.9e-14	--	--	8.6e-84	2.6e-11	--	--
CAI08200.1	2004-12-02	RQUA original identical to WP_083782963.1	--	3.9e-12	2.7e-05	--	--	--	--	7.1e-05	6.7e-07	3.4e-09	2.5e-05	--	9.4e-84	5.1e-05	--	--
WP_081824947.1	2017-04-09	RQUA original	--	2.6e-13	--	--	--	--	4.9e-05	4.2e-05	5.4e-09	2.2e-08	--	--	1.1e-83	--	--	--
WP_083782963.1	2017-04-17	RQUA original	--	4.8e-12	3.3e-05	--	--	--	--	--	7.9e-07	4e-09	2.9e-05	--	1.2e-83	6.1e-05	--	--
ANQ86685.1	2016-07-08	RQUA original identical to WP_011767247.1	--	1.2e-07	--	--	--	--	2.8e-06	4e-06	7.2e-07	3.2e-10	--	--	1.3e-83	--	--	--
WP_077929358.1	2017-02-27	RQUA original identical to WP_077926774.1	--	6.4e-10	--	--	--	--	--	7.3e-05	4.5e-05	2e-07	5.1e-08	--	1.4e-83	--	--	--
WP_011767247.1	2013-05-16	RQUA original	--	1.4e-07	--	--	--	--	3.2e-06	4.4e-06	8.1e-07	3.5e-10	--	--	1.5e-83	--	--	--
GBE44355.1	2017-12-15	RQUA new seq	--	1.3e-09	--	--	--	--	--	--	2.6e-05	4.9e-06	--	--	3.3e-83	--	--	--
WP_092761961.1	2017-07-29	?	--	3.9e-11	--	--	--	--	8.1e-06	2.4e-05	9.9e-09	7.6e-11	3.9e-06	--	3.9e-83	1.1e-05	--	--
KGF70184.1	2014-09-29	RQUA original identical to WP_081963697.1	--	1.3e-10	--	--	--	--	--	--	3.4e-05	4.5e-06	--	--	1.6e-82	--	--	--
WP_081963697.1	2017-04-09	RQUA original	--	1.5e-10	--	--	--	--	--	--	3.7e-05	4.8e-06	--	--	1.8e-82	--	--	--
WP_102041839.1	2018-01-11	RQUA new seq	--	4.1e-10	--	--	--	--	--	1.4e-05	4.1e-06	1.6e-08	--	--	3.4e-82	--	--	--
SDH27902.1	2016-10-20	RQUA original	--	6.4e-12	3.2e-05	--	--	--	--	7.9e-05	3.4e-07	6.4e-09	7.7e-05	--	4e-82	1.9e-06	--	--
WP_004259720.1	2013-05-07	RQUA original	--	3.4e-10	--	--	--	--	6.5e-06	1.6e-05	6.1e-10	1.1e-09	--	--	6.2e-82	--	--	--
PIW29281.1	2017-11-16	RQUA new seq	--	1.5e-11	--	--	--	--	--	--	2.4e-05	--	--	--	2.5e-81	8.9e-05	--	--
AMO39183.1	2016-03-08	RQUA original identical to WP_004259720.1	--	1.5e-09	--	--	--	--	1.3e-05	4.5e-05	4.1e-09	8.4e-09	--	--	3.2e-81	--	--	--
WP_082794360.1	2017-04-12	RQUA original identical to WP_004259720.1	--	1.9e-09	--	--	--	--	1.5e-05	5.5e-05	5.3e-09	1e-08	--	--	4.5e-81	--	--	--
OGB20782.1	2016-10-18	RQUA original	--	8.6e-19	1.2e-11	--	--	--	4.4e-12	2.7e-05	--	1.2e-14	2e-06	--	1.6e-80	2.1e-10	--	--
AKA62191.1	2015-08-07	RQUA original	--	8.2e-11	--	--	--	--	4.1e-05	4.1e-06	--	3.7e-07	1.9e-06	--	3.2e-80	--	--	--
WP_094267074.1	2017-08-12	RQUA original identical to WP_004259720.1	--	3.1e-11	--	--	--	--	9e-07	1e-05	5.1e-09	9.3e-10	--	--	1.3e-79	--	--	--
AKA62179.1	2015-08-01	RQUA original	--	--	--	--	--	--	--	--	--	7.8e-08	--	--	3e-79	--	--	--
OGC81256.1	2016-10-18	RQUA original	--	2.5e-18	1.4e-08	--	--	--	2.5e-08	--	--	4e-09	--	--	3.7e-79	5.8e-09	--	--
WP_092619152.1	2017-07-29	RQUA original identical to SDH27902	--	3.9e-12	2.5e-05	--	--	--	--	5.3e-05	2.4e-07	4.3e-09	5e-05	--	3.7e-78	1.2e-06	--	--
AKA62192.1	2015-08-07	RQUA original	--	3e-08	--	--	--	--	4.1e-05	--	--	1.2e-06	--	--	8.4e-78	--	--	--
XP_012895486.1	2015-06-29	identical to XP_012898200.1	--	3.2e-07	--	--	--	--	--	--	--	6.1e-06	--	--	3.5e-77	--	--	--
XP_012898200.1	2015-06-29	identical to XP_012898200.1	--	3.2e-07	--	--	--	--	--	--	--	6.1e-06	--	--	3.6e-77	--	--	--
OAO16016.1	2016-05-24	identical to XP_014524637	--	6.9e-08	--	4.2e-16	--	--	5.3e-05	--	--	2.1e-06	--	--	6.3e-77	--	--	--
XP_014524637.1	2015-11-10	identical to OAO16016.1	--	3.7e-08	--	--	--	--	3.9e-05	--	--	2.7e-06	--	--	4.2e-74	--	--	--
AKA62177.1	2015-08-01	RQUA original	--	--	--	--	--	--	--	--	--	1.6e-05	--	1.3e-05	1.3e-72	--	--	--
OHA91820.1	2016-10-21	RQUA original	--	6.9e-25	9.3e-12	--	4e-05	--	1e-15	2.5e-07	1.5e-06	2.5e-14	2.3e-05	--	4e-72	4.5e-13	--	--
SBW11577.1	2017-06-15	RQUA new seq	--	--	--	--	--	--	--	--	--	--	--	--	1e-71	--	--	--
CDA18323.1	2013-05-31	Proteobacteria clade	--	1.2e-13	--	--	--	--	2.1e-08	9e-07	4.6e-06	2.4e-10	4.3e-05	--	2.6e-60	--	--	--
OLA82584.1	2016-12-23	Proteobacteria clade	--	1.2e-11	--	--	--	--	3.5e-07	1.3e-07	9.4e-09	5.6e-10	--	--	6.8e-60	--	--	--
CDB54263.1	2013-05-31	Proteobacteria clade	--	3e-11	--	--	--	--	--	2e-06	9.4e-06	4.7e-08	3.7e-08	--	1.2e-58	--	--	--
CCZ22922.1	2013-05-31	Proteobacteria clade	--	2.4e-10	1.7e-05	--	--	--	--	1.8e-05	1.5e-06	7.4e-09	--	--	1.5e-56	--	--	--
CDB39348.1	2013-05-31	Proteobacteria clade	--	3.6e-12	--	--	--	--	--	--	8.5e-07	1.5e-07	1.9e-05	--	1.2e-55	--	--	--
OIP99065.1	2016-11-09	Proteobacteria clade	--	2.6e-15	2.9e-11	--	5.1e-05	--	1.3e-09	6.3e-07	2.2e-07	1.3e-09	--	--	2.2e-55	5.8e-07	--	--
CCZ31329.1	2013-05-31	Proteobacteria clade	--	2.9e-11	3.7e-05	--	--	--	5.2e-05	--	6.1e-06	7.4e-10	4.2e-06	--	4.2e-55	6.8e-05	--	--
PCI44856.1	2017-09-28	Proteobacteria clade	--	4.3e-14	2.7e-11	--	--	--	2.3e-08	--	3.4e-06	1.4e-09	--	--	4.9e-55	1.5e-07	--	--
PKO51002.1	2017-12-13	RQUA new seq	--	1.3e-07	--	--	--	--	2.8e-05	3.1e-05	2e-06	5e-08	--	--	5.2e-55	--	--	--
GAV20128.1	2016-11-25	Proteobacteria clade identical to WP_083530462.1	--	3.2e-14	2.8e-10	--	--	--	2.1e-07	--	7.8e-05	1.3e-09	--	--	6.2e-55	9.4e-08	--	--
WP_083530462.1	2017-04-16	Proteobacteria clade	--	3.8e-14	3.3e-10	--	--	--	2.3e-07	--	9.2e-05	1.5e-09	--	--	7.5e-55	1.1e-07	--	--
PIX60734.1	2017-11-16	Proteobacteria clade	--	1.1e-21	1.8e-15	--	--	--	3.2e-13	1.2e-07	6.2e-06	1.1e-14	2.1e-09	--	8e-55	2.6e-10	--	--
ALP53758.1	2015-11-24	Proteobacteria clade	--	3e-20	2.4e-16	--	1.2e-07	--	2.4e-12	2.2e-07	--	1.3e-12	--	--	1e-54	3.7e-13	--	--
WP_100266340.1	2017-11-29	Proteobacteria clade	--	2.7e-17	6.2e-12	--	--	--	2.1e-09	--	--	2.2e-10	--	--	3.6e-54	4.9e-06	--	--
PIQ36820.1	2017-11-14	Proteobacterial clade identical to PIX60734.1	--	1.6e-20	3e-14	--	--	--	5.4e-12	6.2e-08	1.1e-05	6.5e-14	2e-08	--	4.4e-54	2.8e-09	--	--
WP_100278553.1	2017-11-29	Proteobacteria clade	--	6.4e-18	8.2e-11	--	--	--	9.1e-10	2.6e-05	5.9e-06	4e-11	--	--	4.4e-54	5.6e-07	--	--
PIV32403.1	2017-11-16	Proteobacteria clade	--	1.5e-18	1.2e-11	--	--	--	4.7e-12	3.3e-09	4.4e-08	2.3e-13	2.5e-05	--	6.5e-54	2.5e-08	--	--
WP_038250754.1	2014-12-25	Proteobacteria clade	--	1.2e-15	2.3e-09	--	--	--	3.2e-07	--	--	7.1e-08	--	--	2.8e-53	1.3e-05	--	--
PKM14796.1	2017-12-13	Proteobacteria clade	--	5.1e-22	1.9e-14	--	--	--	3.1e-12	1.2e-07	2.5e-05	2.5e-14	4.5e-10	--	2.8e-52	2.9e-10	--	--
PKM06744.1	2017-12-13	Proteobacteria clade	--	2.4e-21	5e-14	--	--	--	4.2e-12	1.5e-07	--	5.5e-14	2.8e-10	--	3.1e-52	6.7e-10	--	--
PIP80511.1	2017-11-14	Proteobacteria clade	--	1.1e-22	9.3e-15	--	--	--	6.4e-12	2e-06	3.1e-06	1.3e-11	2.3e-09	--	6.8e-52	6.2e-09	--	--
PCI57494.1	2017-09-28	Proteobacteria clade	--	2.5e-16	1.3e-09	--	--	--	4e-08	--	--	1.9e-07	--	--	3.7e-51	--	--	--
PCI58797.1	2017-09-28	Proteobacteria clade	--	3.4e-16	9.6e-10	--	--	--	2.5e-09	--	--	1.3e-09	6e-05	--	6.3e-51	3.8e-05	--	--
PCH95081.1	2017-09-28	Proteobacteria clade	--	2.3e-15	3.8e-09	--	--	--	3.3e-07	--	--	1.5e-06	--	--	6.6e-51	4.4e-05	--	--
PHR84191.1	2017-10-26	Proteobacteria clade identical to PCI57494	--	1.4e-15	1.3e-09	--	--	--	4.2e-08	--	--	8.7e-07	--	--	7e-51	--	--	--
OGS97732.1	2016-10-20	Proteobacteria clade	--	3.4e-17	1.7e-15	--	--	--	5.1e-12	4.7e-07	--	2.7e-12	8.8e-06	--	2.6e-50	8.7e-12	--	--
OGP16641.1	2016-10-20	Proteobacteria clade	--	7.5e-16	5.6e-11	--	--	--	3.9e-11	--	5.3e-05	1.4e-09	--	--	5.3e-50	2.1e-06	--	--
OIQ03420.1	2016-11-09	Proteobacterial clade identical to PIO89946.1	--	3.7e-16	7.6e-14	--	3.7e-05	--	7.7e-15	3e-07	--	4.3e-15	7.2e-05	--	3.5e-49	1e-09	--	--
PIO89946.1	2017-11-14	Proteobacteria clade	--	4.9e-16	9.7e-14	--	4.7e-05	--	9.4e-15	3.6e-07	--	5.3e-15	9.1e-05	--	5e-49	1.3e-09	--	--
PKL95920.1	2017-12-13	Proteobacteria clade	--	1.7e-21	1.8e-13	--	--	--	1.3e-13	5.1e-07	--	5e-16	5.8e-10	--	9.8e-49	1e-13	--	--
PJC68462.1	2017-11-16	Proteobacterial clade identical to PIO89946.1	--	3.3e-16	6.1e-14	--	3e-05	--	7e-15	2.5e-07	--	4e-15	6.1e-05	--	1e-48	8.3e-10	--	--
PJA41264.1	2017-11-16	Proteobacteria clade	--	3e-17	1.5e-11	--	--	--	1.2e-11	2.8e-09	4.4e-08	7.2e-13	2.9e-05	--	1.2e-48	2.5e-08	--	--
OIO66252.1	2016-11-09	Proteobacteria clade	--	3.9e-17	2.9e-13	--	--	--	4.1e-11	--	1.8e-05	6.8e-11	--	--	2e-48	6.9e-07	--	--
OIO70393.1	2016-11-09	Proteobacteria clade	--	3.7e-15	9.8e-12	--	5.5e-05	--	1e-12	2.1e-05	--	3.3e-12	8e-05	--	1.1e-47	6.3e-07	--	--
PIV14543.1	2017-11-16	Not RQUA, identical to PIV91247.1	--	3.2e-16	1.3e-13	--	--	--	1.2e-13	1.8e-06	--	1.1e-13	--	--	6.7e-47	2.2e-09	--	--
OGT05110.1	2016-10-20	Proteobacteria clade	--	3.9e-16	6.1e-15	--	--	--	3.2e-10	9.2e-06	--	8.2e-12	--	--	7.8e-47	1.5e-09	--	--
OIO81979.1	2016-11-09	Not RQUA, identical to PIV91247.1	--	4.5e-17	4.7e-14	--	--	--	1.3e-13	1.8e-06	--	1.1e-13	--	--	1.1e-46	3.3e-10	--	--
OGS75439.1	2016-10-20	Proteobacteria clade	--	2.6e-16	5.4e-13	--	--	--	4.1e-11	--	--	3.5e-12	2.2e-06	--	1.8e-46	1.8e-09	--	--
PIR57761.1	2017-11-14	Proteobacteria clade	6e-05	8.9e-32	3.1e-19	--	3.3e-07	--	3e-17	1.2e-13	5.7e-09	1.3e-18	4.7e-17	9.7e-11	5e-45	1.3e-14	--	--
PJA32142.1	2017-11-16	Proteobacteria clade	--	3.2e-09	7.9e-05	--	--	--	--	--	--	3.8e-07	--	--	1.3e-43	--	--	--
OGD24354.1	2016-10-18	Proteobacteria clade	8.7e-05	6.6e-31	9.6e-22	--	--	--	1.9e-17	8.8e-10	4.1e-06	4.9e-19	1e-12	6.2e-05	2.6e-41	1.6e-18	--	--
PJC03297.1	2017-11-16	Not RQUA, identical to PIV91247.1	--	3.3e-17	3.5e-14	--	--	--	8.9e-14	1.3e-06	--	7.8e-14	--	--	2.1e-37	2.3e-10	--	--
OIP14992.1	2016-11-09	Proteobacteria clade	--	2.2e-19	1.6e-13	--	--	--	6.4e-07	--	--	8.3e-09	--	--	4.6e-37	3.9e-11	--	--
PIV91247.1	2017-11-16	Not RQUA	--	1.6e-16	1.5e-13	--	--	--	2.5e-13	8.8e-07	--	7.1e-14	--	--	7.5e-37	1.2e-09	1.4e-34	1.4e-24
OQW86490.1	2017-04-10	Proteobacteria clade	--	5e-20	5.4e-14	--	--	--	2e-07	--	--	6.5e-09	--	--	9.9e-37	4.7e-12	--	--
PKO60859.1	2017-12-13	Proteobacteria clade	--	3e-17	4.6e-12	--	--	--	6.5e-06	--	--	6.2e-08	--	--	3.3e-36	3.6e-10	--	--
PIX03532.1	2017-11-16	Not RQUA, identical to PIV91247.1	--	2.5e-16	1e-13	--	--	--	8.4e-14	1.2e-06	--	7.4e-14	--	--	4e-36	1.6e-09	--	--
WP_078365509.1	2017-03-06	Proteobacteria clade	--	1e-21	4.4e-14	--	--	--	2.1e-07	--	--	4.7e-09	--	--	5.4e-36	9.6e-10	--	--
OIN90486.1	2016-11-09	Proteobacteria clade identical to OIP22000.1	--	1e-21	1.3e-13	--	--	--	5.4e-08	--	--	2.9e-08	--	--	7.1e-36	2e-12	--	--
WP_022771999.1	2013-10-22	Proteobacteria clade	--	3.8e-18	2e-12	--	--	--	1.1e-07	--	--	9.9e-09	--	--	8.2e-36	1.5e-08	--	--
OHC79114.1	2016-10-21	Proteobacteria clade	--	7.5e-24	1.5e-14	--	--	--	5.5e-10	--	--	1.5e-09	--	--	1.7e-35	7.5e-14	--	--
WP_011464464.1	2013-05-16	Proteobacterial clade identical to OHC79114.1	--	8.7e-24	1.7e-14	--	--	--	3.5e-10	--	--	1.7e-09	--	--	1.9e-35	1.3e-13	--	--
PIZ22635.1	2017-11-16	Proteobacteria clade	--	6.2e-18	5.2e-12	--	--	--	4e-06	--	--	3e-07	--	--	8.2e-35	1.9e-10	--	--
OGB39117.1	2016-10-18	Proteobacteria clade	--	6.8e-19	1.8e-12	--	--	--	8.1e-07	--	--	5.3e-08	--	--	1.1e-34	1.9e-10	--	--
OIP22000.1	2016-11-09	Proteobacteria clade	--	2.1e-20	4.8e-13	--	--	--	6.5e-08	--	--	6.7e-08	--	--	1.1e-34	9.6e-11	--	--
PIY27260.1	2017-11-16	Proteobacteria clade identical to OIP22000.1	--	1.7e-20	5e-13	--	--	--	6e-08	--	--	6.5e-08	--	--	1.2e-34	1.3e-10	--	--
WP_075586157.1	2017-01-11	Proteobacteria clade	--	1.1e-16	1.9e-12	--	--	--	7.7e-06	--	--	3.7e-07	--	--	1.2e-34	1.7e-09	--	--
OGB87865.1	2016-10-18	Proteobacterial clade identical to OGB39117.1	--	9.8e-19	1.9e-12	--	--	--	8.1e-07	--	--	5.3e-08	--	--	2.5e-34	2.6e-10	--	--
OGA31640.1	2016-10-18	Proteobacteria clade	--	4.5e-19	1.2e-10	--	--	--	8.6e-05	--	--	1.4e-07	--	--	4.5e-34	4e-11	--	--
KIF83154.1	2015-01-15	Proteobacterial clade identical to WP_040041780.1	--	4.7e-19	1.2e-12	--	--	--	1.3e-05	--	--	3.1e-07	--	--	4.8e-34	5.7e-13	--	--
WP_040041780.1	2015-01-20	Proteobacteria clade	--	4.9e-19	1.3e-12	--	--	--	1.3e-05	--	--	3.2e-07	--	--	5e-34	5.9e-13	--	--
WP_088709215.1	2017-07-01	Proteobacteria clade	--	2.1e-20	8.2e-11	--	--	--	8.9e-07	--	--	6.5e-09	--	--	1.1e-33	2.3e-12	--	--
OGA13097.1	2016-10-18	Proteobacteria clade	--	7.2e-19	4e-11	--	--	--	--	--	--	2.5e-07	--	--	3.5e-33	5.6e-10	--	--
OFZ85935.1	2016-10-18	Proteobacteria clade	--	3.8e-21	9.1e-12	--	--	--	7.3e-06	--	--	6.1e-09	--	--	7e-33	3.5e-11	--	--
KPK20099.1	2015-09-30	Proteobacteria clade	--	1.4e-19	5.7e-11	--	--	--	7.8e-05	--	--	2.9e-08	--	--	8e-33	1.6e-09	--	--
OGV76668.1	2016-10-20	Proteobacteria clade	--	4.8e-18	1.2e-12	--	--	--	2.8e-06	--	--	8.4e-08	--	--	8.9e-29	4.9e-12	--	--
PIY03799.1	2017-11-16	Not RQUA, identical to PIV91247.1	--	2e-12	1.6e-11	--	--	--	6.2e-13	2.2e-05	--	3.5e-12	--	--	2.4e-23	8.5e-07	--	--
WP_082753820.1	2017-04-11	Mycobacterium Clade identical to KWX66910.1	--	1.5e-06	1.1e-05	--	4.5e-05	--	7e-09	5.5e-09	3.6e-05	2.7e-13	7.3e-05	--	2.1e-14	--	--	--
KWX66910.1	2016-02-02	Mycobacterium Clade	--	1.7e-06	1.3e-05	--	5.1e-05	--	7.9e-09	6.2e-09	4.1e-05	2.9e-13	8.3e-05	--	2.5e-14	--	--	--
WP_083143005.1	2017-04-13	Mycobacterium Clade	--	3.1e-07	1.7e-06	--	5.4e-05	--	7e-10	4e-09	--	1.5e-13	--	--	4.5e-14	--	--	--
WP_011782594.1	2013-05-16	Mycobacterium Clade	--	5.6e-06	--	--	--	--	3.4e-09	1.8e-08	--	8.3e-14	8.5e-05	--	8.1e-14	--	--	--
WP_029117320.1	2014-06-13	Mycobacterium Clade	--	2.8e-07	2.5e-05	--	3e-05	--	1.2e-09	3e-08	--	1.5e-13	3.2e-05	--	8.6e-14	--	--	--
WP_079926523.1	2017-03-22	Mycobacterium Clade	--	9.7e-09	3.5e-07	--	8.9e-06	--	1.3e-09	1.5e-08	--	1.5e-13	1.3e-07	--	1.4e-13	--	--	--
WP_064348171.1	2016-05-28	Mycobacterium Clade	--	1.1e-06	1.3e-06	--	1.8e-05	--	3.1e-10	4.9e-07	--	1.2e-12	--	--	3.6e-13	--	--	--
WP_067394367.1	2016-08-18	Mycobacterial clade identical to GAT11578.1	--	1.5e-05	4.3e-05	--	3.3e-05	--	1.9e-09	3.8e-08	--	1.7e-12	--	--	5.4e-13	--	--	--
GAT11578.1	2016-02-10	Mycobacterium Clade	--	1.8e-05	5.3e-05	--	3.8e-05	--	2.1e-09	4.5e-08	--	1.9e-12	--	--	6.9e-13	--	--	--
WP_097940209.1	2017-10-18	Not RQUA	--	5.4e-06	--	--	--	--	2.9e-08	8.5e-08	--	2.2e-12	--	--	1.4e-12	--	--	--
WP_031420633.1	2014-08-03	Not RQUA	--	5.9e-12	7.3e-09	--	--	--	2.9e-09	--	--	1.7e-06	8.8e-05	--	2.7e-12	3.2e-06	--	--
WP_011857283.1	2013-05-16	Mycobacterium Clade	--	4.4e-05	--	--	--	--	3.1e-06	1.4e-07	--	5.3e-12	--	--	3.5e-12	--	--	--
WP_090364954.1	2017-07-29	Mycobacterial clade identical to SCX34583.1	--	7.8e-06	--	--	7.8e-06	--	6.4e-07	1e-06	--	1.6e-10	--	--	1.3e-11	--	--	--
SCX34583.1	2016-10-17	Mycobacterium Clade	--	9e-06	--	--	8.8e-06	--	7.1e-07	1.1e-06	--	1.7e-10	--	--	1.5e-11	--	--	--
WP_064403813.1	2016-05-28	Mycobacterium Clade	--	4.3e-05	--	--	--	--	7.3e-08	2.1e-06	--	3.3e-10	--	--	4.8e-11	--	--	--
WP_005140886.1	2013-05-08	Mycobacterium Clade	--	3.1e-08	--	--	6.9e-05	--	7.7e-07	7e-09	5.9e-05	6.5e-11	--	--	6.1e-11	--	--	--
AEO98272.1	2011-09-21	Not RQUA	--	7e-09	9.7e-05	--	--	--	1.3e-06	--	--	1.4e-07	1.7e-06	--	3.2e-09	--	--	--
YP_293810.1	2005-08-26	Not RQUA identical to AEO98272.1	--	1.2e-08	7.8e-05	--	--	--	1.2e-06	--	--	1.4e-07	1.8e-06	--	3.3e-09	--	--	--
CAZ69392.1	2010-01-07	Not RQUA identical to AEO98272.1	--	2e-08	7.9e-05	--	--	--	1.5e-06	--	--	1.1e-07	1.4e-06	--	4.2e-09	--	--	--
WP_067429868.1	2016-08-18	Not RQUA	--	--	--	--	8.6e-07	--	3.1e-05	5.7e-07	1.8e-05	8.9e-08	5.6e-05	--	2.2e-08	--	--	--
WP_041068672.1	2015-01-30	Not RQUA	--	--	--	--	--	--	--	4.2e-05	5.5e-05	--	--	--	3.4e-08	--	--	--
CCQ57864.1	2013-09-11	?	--	8.9e-06	--	--	--	--	--	--	--	--	--	--	3e-07	--	--	--
KQC09566.1	2015-10-26	Not RQUA	--	--	--	--	--	2.2e-05	--	5.7e-05	--	4e-06	--	--	3.8e-07	--	--	--
OJU18420.1	2016-12-09	Not RQUA	--	--	--	--	--	--	1.8e-05	--	--	--	--	--	1.1e-06	--	--	--

## Sheet: RQUA and Q-utilizing proteins -
			PLEASE NOTE: For many of the MMETSP projects, proteins were not identified in the protein files (likely due to the incorrect genetic code being used for translation). TBLASTN was used to identify the corresponding transcripts in the nucleotide database.
			Amoebozoans				Stramenopiles-Alveolates								Obazoans				Excavates				Rhizarians					Archaeplastida
			Mastigamoeba balamuthi	Entamoeba histolytica	Neoparamoeba aestuarina	Paramoeba atlantica	Blastocystis sp.	Attheya septentrionalis	Staurosira complex	Condylostoma magnum	Fabrea fabrea salina	Blepharisma japonicum	Synedropsis recta	Climacostomum virens	Monosiga ovata	Pygsuia biforma	Homo sapiens	Saccharomyces cerevisiae	Eutriptiella gymnastica	Euglena gracilis	Trichomonas vaginalis	Giardia intestinalis	Sorites sp.	Reticulomyxa filosa	Elphidium margaritaceum	Brevimastigomonas motovehiculus	Ammonia sp.	Arabidopsis thaliana
	Protein name	Abbreviation														https://www.ncbi.nlm.nih.gov/Traces/wgs/?val=GCRY01
Q-utilizing enzymes	Succinate dehydrogenase flavoprotein subunit (Complex II)	SDHA (CII)	AJE29361	-	CAMPEP_0201522258	CAMPEP_0201488056	CBK21813,	CAMPEP_0198291020	CAMPEP_0202496800	CAMPEP_0168313662	CAMPEP_0202430496	CAMNT_0049638915	CAMNT_0006969159	CAMPEP_0204898072	DC488170	GCRY01001044	NP_004159.2	NP_012774.1	CAMPEP_0113740144	EC682251	-	-	CAMPEP_0114676246	ETO06113	CAMPEP_0202697176	MFSLRRLGLKLTKASQRSFSVISNSKPEVKGTGKISSAYPVIDHEYDAIIVGAGGAGLRAAVGLSEFGFKVACLSKLFPTRSHTVAAQGGINAALGNMHKDDWRWHAYDTVKGSDWLGDQDSIHYMCREAPRAVLELEAYGLPFSRTEDGRIYQRSFGGQTLNYGKDGSAYRTAACADRTGHAMLHTMYGQALKHNTTFFIEFFATDLLMHNGRCNGVMAFCMEDGSWHRFKAHETILATGGFGKTYFSATSAHTCTGDGSAMVTRALLPNQDMEFVQFHPTGIYGAGCLMSEAARAEGGYLTNSKGERFMVKYAPNLKDLASRDVVSRSCTIEINEGRGCGPNKDYINLHLNHLPANILHERLPGITETAKIFAGVDATKEPIPIVPTCHYNMGGIPT…	CAMPEP_0197024740	NP_201477.1
	Succinate dehydrogenase Fe-S cluster subunit (Complex II)	SDHB (CII)	AGA37361	-	CAMPEP_0201522344	CAMPEP_0201475132	CBK19826	CAMPEP_0198305428	CAMPEP_0202481030	CAMNT_0008271953	CAMPEP_0202430618	CAMNT_0049647697	CAMNT_0006956959	CAMPEP_0204908736	EC168483.1	GCRY01005621	NP_002991.2	NP_013059.1	CAMPEP_0113749350	EC631807	-	-	CAMPEP_0114669522	ETO23781	CAMNT_0049348981	MLKLLATSRLVRSAVRFQATTPKEKRPKQFKIYRWNPDKPTQKPYMQTFEVDLNDCGAMMLDVLIKIKTEQDPTLTFRRSCREGICGSCAMNIDGNNHLACITFIPQTSKPTSIYPLPHTDVIKDLVPDLSRFYAQYSMIKPWLIPKTAPTPGKEFLQSQADRKKLDGMIECVLCACCSHLCPSYWWNGDKYLGPAVLQQALRWIVDSRDGATEERMKFVDDQWKLYRCHAIMNCTKTCPKNLNPGKAIAQLKLEIVNHRWSKH	CAMPEP_0197029834	NP_189374.1
	Succinate dehydrogenase large cytochrome b subunit (Complex II)	SDHC (CII)	AJE29362.1	-	CAMPEP_0201516700	CAMPEP_0201487818	CBK21668	CAMPEP_0198288314	CAMPEP_0202480728	?	?	?	CAMNT_0006964811	?	?	GCRY01003167	CAG33383.1	NP_013836.1	?	?	-	-	?	?	CAMNT_0049367543	MLSRIASRALSSKVVLSRAIRAFATNKPLATDAWPSNEKTVILPHGFGGYKIPAPQMSTRPSAPFEIAIPKFPQQAITSIIHRISGLVLSIGFAGIGTLALFGSANVSIYWEYFYLHYPALMYLAKLAIAFPLILHFTNGIRHMLWDANPEWMNSCNALNKHALAALVFASIIAFFLIFFC	CAMNT_0042459051	NP_001078555.1
	Succinate dehydrogenase small cytochrome b subunit (Complex II)	SDHD (CII)	AJE29363.1	-	CAMNT_0047919537	CAMPEP_0201520992	CBK21753	?	CAMPEP_0202490516	?	?	?	CAMNT_0006964811	?	?	GCRY01001908	NP_001263435	NP_010463.1	?	?	-	-	?	?	CAMPEP_0202685306	MLSKLNVSKTVLSRALLLKSARILMPKIAQFHSSGVRVNQTPVREESSAIQRYYQFQQGFPHWMHKTIKFVFAGFPLAFILSYVAPHWTVVPFDVILGIAVPIHAYVGTTMIIQDYCPNALKFPIVLLWTVFILLGAAGLLKLNLYGPGITEAIKSVWYSNKKGLGLLKCNCVKKDEKKTEVVPKDAKLEAKTVAPVATTTAKPATPAPAPLKDAKLEAKAVSAPTAPAPAPKDAKVAEAPKAAAVAAPSPAKKA	CAMPEP_0197020384	OAP08637.1
	Ubiquinole:cytochrome c oxidoreductase	CIII	?	-	+	+	-	+	+	+	+	+	+	+	+	?	+	+	+	+	-	-	+	+	+	+	+	+
	Alternative oxidase	AOX	?	-	CAMPEP_0201524142	CAMPEP_0201479200	CBK20239	CAMPEP_0198305932	CAMPEP_0202485688	?	CAMPEP_0202440548	?	CAMNT_0006955877	?	DC514018.1	GCRY01001846	-	-	CAMPEP_0113759580	EC671217.1	-	-	CAMPEP_0114684126	ETO18223	CAMPEP_0202703522	MLKQLFRSSVLSASKLKGFSTTVSATPATATITPEKKATTTHSTPSHSVDRESWNLSHPIWTEEYVKSVGVTHRPCQTVTDYLALGTIKLIRTGFDLITLYPFVPMTAKRFLTRMIFLETVAAIPGTVAASARMLQSCRKMKRDYGFFHTLVEEAENERMHLMTALKLREPGKMFRVAVTLTQFGFLGFYKLTYAISPIFCHRLVGYLEEEAVRTYTKCIDHIEKGHFWKDTPAPYVAIRYWQLKPNATMHDVILHIRADEVHHREVNHDFANVLPDNKPNPYFPGQ	CAMPEP_0197026146	NP_201226.2
	Glycerol-3-Phosphate dehydrogenase	G3PDH	?	-	CAMPEP_0201519694, CAMPEP_0201525682, CAMPEP_0201540648	CAMPEP_0201476840	CBK22026 (partial)	CAMPEP_0198285898	CAMPEP_0202485902, CAMPEP_0202487920, CAMPEP_0202508428	CAMNT_0008297807	CAMNT_0049045113	CAMNT_0049663483	CAMNT_0006961867	CAMPEP_0204902856	DC497533.1	GCRY01001244	XP_011509280.1	NP_012111.1	?	EC673121	-	-	CAMNT_0001887343	ETO26560	CAMPEP_0202696128	IYLSMHSNDAKKHRIAVVGSGNFGTCAARLVGTNCSRYPNQFEREVRMYMHEEKFQGRSLIHAFNETHENPKYLPGISVPQNVVAMSNVKEVCEGATIWIFVLPFQFIRPVCEQLK	CAMPEP_0197073028	NP_187648.1
	Electron transfering flavoprotein dehydrogenase	ETFDH	KJ993879	-	CAMPEP_0201509050	CAMPEP_0201488444	CBK23528	CAMPEP_0198285410	CAMPEP_0202507958	CAMNT_0008296633	CAMPEP_0202440490	CAMNT_0049652353	CAMNT_0006965079	CAMPEP_0204916234	DC493624	GCRY01002506	NP_001268667.1	NP_015001.1	CAMPEP_0113765202	EC682305	-	-	CAMPEP_0114657938	ETO12148	CAMPEP_0202703804	MLRISKRALFCTRGLRCFATQSSLPKREVMDYDVVVVGAGCAGLSTAIRLKQLAKAKKSEVSVCVLEKGAEVGSHILSGNVFETAALSELIPDWKEKKAPLTQPALHDHFAFLTSRWTIPLPSPPTMNNHGNYIISLANLTRWMGTQAQEMGIDIFPGFAASEVLYNEKAQVIGVATNDMGIGKDGKQKSTFQRGVELHGKQTVFAEGCRGSLSEKIMTKYQLRNGRDPQTYGIGFKEVWEVPNSAIQPGNIFHTIGWPMNMSTYGGSFMYHMGPNQIHLGFVLGLDYKNPYLNPYQEFQRMKLHPYFRRFLDGGKRIAYGARCINEGGWQSVPKLTFPGGVLVGASAGFMNVPKIKGAHTAMRTGMMAADALFESIDTWKKDTTYNAIGQEIVSYQRK…	CAMPEP_0197023206	NP_001324650.1
	Electron transfering flavoprotein alpha	ETFa	KP006414	-	CAMPEP_0201531134	CAMPEP_0201488204	CBK19678	CAMPEP_0198281122	CAMPEP_0202484578	CAMNT_0008294739	CAMPEP_0202425618	CAMNT_0049648023	CAMNT_0006958693	CAMPEP_0204906776	DC493809.	GCRY01004581	NP_000117.1	NP_015329.1	CAMPEP_0113756848	EC632100	-	-	CAMPEP_0114653594	ETO21670	CAMPEP_0202694608	MRRFTPLLRSFNSLSRSQRSLFSRRTFATKCLVLADHDNKQSSDSTFACITAASKLGKDCTVLVTGKNCGSVAEQLSKIKGVSKVVVAEHDALENGLTENVSSVMVELQEANKYTHIMAGATSFTKNVIPHMAVKYDVQPISEIVGVQSEDTFQRLLYAGNAVCNVQSTDALKVMTVRTTAFDKAQPGPSAAPIEKMTPKTVDAGVSSFESAEVRKSERPSLTSAAVVVSGGRALKSKDGFKIIYDLADKLQGAVGATRAAVDAGYVGNDLQVGQTGKVVAPELYLAVGISGAIQHIAGMKDSKTIVAINKDAEAPIFSVADYGLVADLFKVVPELIAALPTPKSP	CAMPEP_0197025974	NP_175507.1
	Electron transfering flavoprotein beta	ETFb	KP006415	-	CAMPEP_0201520852	CAMPEP_0201487620	CBK24679	CAMPEP_0198290466	CAMPEP_0202484774	CAMNT_0008313385	CAMPEP_0202435470	CAMNT_0049644661	CAMNT_0006965689	CAMPEP_0204905212	EC165240	GCRY01004233	NP_001976.1	NP_011723.1	CAMPEP_0113735118	EL579606	-	-	CAMPEP_0114637580	ETO10257	CAMPEP_0202705670	MSLKALVAVKRVCDYAVKIRVRPDKTGVELGNVKMSMNPFCEIACEEAVRMREKGMIKEVVALSVGPKACQETLRTALAMGADRGVLVETDLRGDTDLQPLCVSKVLAAICKKENPLVVLLGKQAIDSDNGQVAQMLAAMMKWSLGTFASKITLSQDKKFVIVQREVDNGVQTIKCSLPSVLSTDLRLNEPRFATLPNIMKARKKTIEVIPIASLGIDPKPHMKILSVEEPAARKAGVKVESVQQLVDILKQKGFVKA	CAMPEP_0197032378	NP_001032002.1
	NADH:Ubiquinone oxidoreductase (Complex I)	CI	?	-	+	+	+	+	+	+	+	+	+	+	+	?	+	+ (alt)	+	+	-	-	+	+	+	+	+	+
	NADH:Ubiquinone oxidoreductase E subunit (Complex I)	NuoE	?	-	CAMPEP_0201517976	CAMPEP_0201483948	CBK22400	CAMPEP_0198306504	CAMPEP_0202507052	CAMNT_0008286781	CAMPEP_0202427644	CAMNT_0049642685	CAMNT_0006965273	CAMPEP_0204905260	DC482277	GCRY01000717	XP_016881271.1	-	CAMPEP_0113751062	EC629958	AAV65813.1	-	CAMNT_0001885541	ETO36069	CAMPEP_0202690914	MLRRVVPRLFALQKCAFRSSPPRFSLPDPVQHRKDWGDENQKFEFTPESYKKIESVLKKFPANRKQSAVIYLLYIAQEQNDNWIPLAAMNKIAQLLAMPPVRVYEVATFYTMFNRKPVGKVHIQLCGTTPCQLCGSEAVRDAISKHFHVHVGETNAEKTVTLWEVECLGACVNAPMMQVNNKYFYEFLTPEKAIKIVEDLIAGKPVKTNNQNHVFSCEGPLGQTTLKGPEIVDPPCRDFAALKAKQPSPAAPKPKA	CAMNT_0042456991	NP_567244.1
	NADH:Ubiquinone oxidoreductase f subunit (Complex I)	NuoF	?	-	CAMPEP_0201521156	CAMPEP_0201488750	CBK24378	CAMPEP_0198292212	CAMPEP_0202492546	CAMPEP_0168314230	CAMPEP_0202431040	CAMNT_0049644115	CAMNT_0006968507	CAMPEP_0204898324	DC504328	GCRY01000778	NP_009034.2	-	CAMPEP_0113748202	EC677954	AAV65812.1	-	CAMPEP_0114661878	ETO35987	CAMPEP_0202691730	MQRALTGQLRLSFIPLRSSVCRIRNRTFANVTTAATPERFHGDLKDSDRIYTNIYGKFDTSIKGAMRRGDWHRTKDILGMGRDWVINEMKASGMKGRGGAGFPTGMKWSFMPKESKDGRPQYLVVNADESEPATCKDREIMRHDTHKLIEGCLVAGFAMGAHAGYIYIRGEFWQESECLERAIKEAYAAGFLGKNACKSGWDFDLNVARGAGAYICGEETALIESLEGKQGKPRLKPPFPANVGLYGCPTTVNNVETIASCPTIMRRGGAWFSSLGRKNNSGTKLFCISGHVNNPQTFEEEMSIPLKYVLEKHCGGIRGGWNNLLAVIPGGSSVPCLTREMCEKALMDFDSLRSMGSGLGTAGVIVMDKSTDIIKAIQRLSYFYKHESCGQCTPCREGT…	CAMPEP_0197031404	NP_196470.1
	Dihydroorotate dehydrogenase (Q-dependent)	DHOH	?	-	CAMNT_0047916119	CAMNT_0047879331	CBK20080.2	CAMNT_0043986077	CAMNT_0049116601	?	?	?	CAMNT_0006978097	CAMNT_0052075995	?	?	XP_005255886.1	-	?	?	-	-	CAMNT_0001874325	ETO30169.1	CAMNT_0049351413	MQRGLFHKVVKVALAGMMVLTVVVTKEIHMALLSRTHWRDIESACNLHNRACGFYKGASLGAIYKYLGAGARVFLPSEDAHSFAIYLAKHARNIRAALGLVDCAPDPDILRTMVFNKTFDNPIGLAAGFDKNGEVVDGLLDMGFGFVEIGTVTPQPQSGNPRPRIFRLSSDRGLPLYLYLYLSLYLLYLPLFLLYLCLSYSYKTTTSTSLSTSSTSPSSSSTSASPTPTKQRRGLVKSVLNAHYYRGYGIVGINIGKNANTPNEEAANDYIKCMSTLSPYADYMVLNVSSPNTKGLRDLQQKIELEKLIIKMQETRKSLKAQPPILVKISPDISESEQKDIAEVLMKNKVDGMIISNTTIERPKTLGSRWKNQLGGLSGKPLREKSTDIISNMYSLTQG…	CAMNT_0042449707	NP_568428.1
	sulfide:quinone oxidoreductase	SQO	?	-	CAMNT_0047917367	CAMNT_0047873223	-	CAMNT_0043998309	CAMNT_0049145139	CAMNT_0008284351	CAMNT_0049043559	CAMNT_0049644803	CAMNT_0006975677	CAMNT_0052067471	?	?	NP_067022.1	-	CAMNT_0000731685	?	-	-	CAMNT_0001875229	ETO29650.1	CAMNT_0049399263	?	CAMNT_0042450821	-
UQ biosynthesis	4-hydroxybenzoate octaprenyltransferase (EC:2.5.1.39)	COQ2	?	-	CAMNT_0047929361	?	-	CAMNT_0043984871	CAMNT_0049131421	CAMNT_0008282327	CAMNT_0049045945	CAMNT_0049640583	?	CAMNT_0052079063	?	?	NP_001345850.1	NP_014439.3	?	?	-	-	?	?	?	?	?	OAO99825.1
	hexaprenyldihydroxybenzoate methyltransferase (EC:2.1.1.64 2.1.1.114)	COQ3	?	-	CAMNT_0047946713	CAMNT_0047877369	-	CAMNT_0044007573	CAMNT_0049115575	CAMNT_0008287295	CAMNT_0049047203	CAMNT_0049648785	CAMNT_0006986297	CAMNT_0052075679	?	?	AAF66826.1	NP_014545.2	?	?	-	-	CAMNT_0001989609	?	?	MLLRLRSKRPFNLVRGLCRAYSDATVDKREIDNFSKLAADWWNPKGPMAGLLSMNTLRSDLLKKVVLARLRPNSSNDQPLTGLRCLDIGCGGGFMTESLARMGATVLGIDATAENIAVARRHLEEQEDRDLAKLIKYEHNTAETVLAEKGSVFDIVCAFEVVEHVKDAQFFTQTCVRLLKPSGLLFMSTVNKTWRALLLAIIGAEYVLRLLPRGTHQYSKFVSPRKLADWIERTHLSAVPTAKRSYSPSTSGFPSPTAESVLSFAKDLSQADNSVARAQLFLQYRDQENRGQRPKQTDQMFEDIRTRFSSSASSSSFSASSSSASSASSASS	CAMNT_0042496321	CAA75340.1
	N,N-dimethylaniline monooxygenase COQ6 (EC:1.14.13.-)	COQ6	?	-	CAMNT_0047940363	CAMNT_0047897173	-	CAMNT_0043998555	CAMNT_0049121265	CAMNT_0008287479	CAMNT_0049043177	CAMNT_0049637979	CAMNT_0006985599	CAMNT_0052065049	?	?	NP_872282.1	NP_011771.1	?	?	-	-	CAMNT_0001938871	?	?	?	?	NP_189062.3
	2-hexaprenyl-6-methoxy-1,4-benzoquinone methyltransferase (EC:2.1.1.201)	COQ5	?	-	CAMNT_0047946699	?	-	?	CAMNT_0049126547	CAMNT_0008266675	CAMNT_0049042001	CAMNT_0049650749	CAMNT_0006989101	CAMNT_0052074635	?	?	NP_115690.3	NP_013597.1	?	?	-	-	CAMNT_0001942689	?	?	?	?	NP_200540.1
	monooxygenase CAT5 (EC:1.14.13.-)	COQ7	?	-	CAMNT_0047911951	?	-	?	?	?	?	?	?	?	?	?	NP_001177912.1	NP_200540.1	?	?	-	-	?	?	?	?	?	-
	phenylacrylic acid decarboxylase PAD1	PAD1	?	-	?	?	-	?	?	?	?	?	?	?	?	?	-	NP_010827.3	?	?	-	-	?	?	?	?	?	-
Energy generation enzymes	Cytochrome c oxidase	CIV	?	-	+	+	-	+	+	+	+	+	+	+	+	?	+	+	+	+	-	-	+	+	+	+/-	+	+
	ATP synthase	CV	?	-	+	+	-	+	+	+	?	+	+	+	+	?	+	+	+	+	-	-	+	+	+	+	+	+
	Succinyl-CoA synthetase alpha subunit	SCSa	?	-	CAMPEP_0201520500, CAMPEP_0201524148	CAMPEP_0201487432	CBK25395	CAMPEP_0198286816, CAMPEP_0198289752	CAMPEP_0202490134	CAMNT_0008272315	CAMNT_0049037957	CAMNT_0049647259	CAMNT_0006956291	CAMPEP_0204919178	DC503594.1	GCRY01000584	NP_003840.2	NP_014785.3	CAMPEP_0113746384	EC683437	P53400.1	-	CAMPEP_0114679372	ETO36756	CAMNT_0049363257	MFSRTLKNCSRNVNRSLARNITFYQEHEMPKVFVNKYTRVICQGFTGKQGTFHSEQAIKYGTKMVGGINAKKAGTMHLGLPVFATVKEAVQEVKASATVIYVPPPSAAAAILEAVEAEIPLAVCITEGIPQQDMVRVKNIIKAQNKTRLIGPNCPGIIKPDQCKIGIMPGFIHKAGKIGIVSRSGTLTYEAVYQTTVTGLGQSTCVGIGGDPFNGTSFIDCLDKFLKDPETEGIIMIGEIGGPQEEDAAEFLKQYNSGANAKPVVGFIAGQTAPPGRRMGHAGAIVSGGKGKAKDKIAALERANVTMTASPAQMGTTMLKVMQSLGKA	CAMPEP_0197026164	NP_197716.1
	Succinyl-CoA synthetase beta subunit	SCSb	?	-	CAMPEP_0201520342, CAMPEP_0201519460	CAMPEP_0201478630, CAMPEP_0201490160	CBK24221	CAMPEP_0198290524	CAMPEP_0202481538	CAMNT_0008279921	CAMPEP_0202425964	CAMNT_0049650957	CAMNT_0006969103	CAMPEP_0204900556	FE866617	GCRY01000388	AAC64396.1	NP_011760.3	CAMPEP_0113754346	EC677804	Q03184.1	-	CAMPEP_0114658134	ETO14279.1	CAMPEP_0202685586	MFRNLIRIVPALRMGARVAMPRFLHSARTVPRMSLLNKTQLNVQAKRFLNLHEYQSKDLMASFGVRVQRGKMANSAEEAYENACWLRETGAKELICKAQIHAGGRGKGHFKSGYKGGVQICSSPEQVREAAKNMIGGRLITKQTTTEGQPCDKVLVHEGISFSAEKYLAILMDRSTHGPVIVASPAGGMEIEEVAHKTPELIFQTPINFFKGVSAQQAEKVARDLGFPESSIKDAATQITNLYNLFMKCDCTQVEINPFVLATDGKIYCVDAKLGFDDNAEFRQKKPYSMRDVSQEDPREVAASKFGLNYIGLDGNIGCMVNGAGLAMATMDIIKLYGGEPANFLDVGGGANEKQVEEAFKIITVDPKVQAVLVNIFGGIMKCDTIATGIVNAAKKLNL…	CAMPEP_0197029334	OAP08931.1
	Acetyl:succinyl CoA transferase Subtype 1A	ASCT 1A	?	-	?	?	-	?	?	?	?	?	?	?	?	?	-	-	?	?	-	-	?	?	?	?	?	-
	Acetyl:succinyl CoA transferase Subtype 1B	ASCT 1B	?	-	?	?	CBK23596	?	CAMPEP_0202487676	?	?	?	CAMNT_0006956339	?	?	GCRY01000464	-	-	?	?	-	-	CAMPEP_0114652556	ETO14272	CAMPEP_0202697406	MLSKIQLLTPCIARIAKRGLHEVDLAKSAPYMSAHEALKTVMKDNIRVYAQIGCSTPKTMLFEMAKFNGQVKNVEVISFHVEGDLPHLKPECKESFRHNALFMVGNVRKAVTDQRADFTPMFFSDAPKAFRTVIPIDVVFLNCSTPDKHGFVSTGAGVGACIAAARSAKKVIAQVNTCMPRTHGGTKLHVSQFDALVKVSDPLPDHSPPPPDAQELKIAEHVASLIPDEACLQFGIGSVPDATAALLKHHKNLGIHTELLGDSLAGLIQCGAVTNKYKKLNQFSSVCTFMGGSQKLYDFVNDNPDVLSFDVDYVNDPFVIMQNPKMHAINGAIEVDLTGQVCADSIGPWLYSGVGGQVDFMTGAARSEGGKAIIALPSVTAKGDNRIVPFLKQGAGVTT…	CAMPEP_0197075358	-
	Acetyl:succinyl CoA transferase Subtype 1C	ASCT 1C	?	-	?	?	CBK20133	?	?	?	?	?	?	?	DC514893.1	GCRY01000587	-	Acetyl-CoA hydrolase NP_009538.1	?	?	EAY15242.1	-	?	?	?	MSAKLLSRIGKASLKSKICKAEDTIPLFKNGMCLGWSGFTPAGYPKAVPIAVADYVEKNKLQGKLRFELFIGASVGAETENRWAKLNMISRRWPYQTGSDIQKGINMNVIDFGDMHLGRFPLCLQAGFYTKDNPRLRGDLDMAIIEASEITEDGGIVPGTGIGAAPELVARARKVIVEVNTLNPSLRGLHDIVTIGKPGTRQPYLITRVDDKIGTDNIPIDSDKIVAIVENADKKDNGRGLSGADEESQAIANHIMQFFEAEVKGGRLPPNLYPLQSGVGNIANAVCGGLVKSNFKNLTSWTEVLQDTLLDLMDADKLNYCTATSLSLSPKGFERFFSKMDFYSKRICLRPQQISNNCEMVRRLGVIAMNTPVEVDIYGHANSTHVEGVRVINGLGGSG…	?	-
	Acetyl-CoA synthetase	ACS	KF927023	EAL50904.1	?	?	CBK25099	?	?	?	?	?	CAMNT_0006968621	?	?	GCRY01000598	-	-	?	?	-	EFO63922.1	?	?	?	?	?	-
	Fumarate hydratase Class II	FUM Class II	?	EAL50440.2	CAMPEP_0201508586	?	CBK23975	?	CAMPEP_0202500862	CAMNT_0008295093	CAMPEP_0202430176	CAMNT_0049636335	CAMNT_0006983043	CAMPEP_0204919302	EC166872.1	?	NP_000134.2	NP_015061.1	?	?	AAK83142.1	-	CAMPEP_0114680912	ETO09916	CAMPEP_0202685984		CAMPEP_0197031642	OAO89069.1
Anaerobiosis- Associated Proteins (AAP)	Rhodoquinone biosynthesis protein	RQUA	KM186976	-	CAMPEP_0201515656	CAMPEP_0201483178	CBK21438	CAMPEP_0198293608	CAMPEP_0202500160	CAMNT_0008288353	CAMPEP_0202430720	CAMNT_0049647487,CAMNT_0049646845	CAMNT_0006981387	CAMNT_0052064891	DC491179.1	GCRY01000773	-	-	CAMPEP_0113734402	isotig01902	-	-	CAMNT_0001913855	ETO28810	CAMPEP_0202694266	MLRTLKSLPRCLSRAITCTPSFIRSRFSSSTITAPPITTTTPPVVSGPQEKKIEIPSYLKNVYTWAYLHPWSVENLDNQVVVDVILFLNARRLIRGALKEFPSGQKIRVLQPAAVYGWLSGLFAEHLGPNAELIVSDIAPVQVEHTARKLANHKNARVIQADARYPKEGPYDGVLCFMLLHEVPNDYKTAIIDAMLKNCKPGGKVVFVEYGPPHWLHPCKPILKFVNGWLEPFACDLWKNEIKSYCTPSLAEKFDWAPVKRVFGGVYQRVVVTPKPGWQACPPKEP	CAMPEP_0197027732	-
	Fumarate hydratase Class I (Anaerobic)	FUM Class I	?	GAT99739.1	CAMPEP_0201523728, CAMPEP_0201536966	CAMPEP_0201487810, CAMPEP_0201480658	CBK25206	?	CAMPEP_0202490524	?	?	?	CAMNT_0006956041	?	DC490243.1	GCRY01003490	-	-	CAMPEP_0113751726	EC681221	-	-	CAMPEP_0114651916	?	?	MYTKFVRSFASKPAYQFKPLFQNDTNPVKTEYKKLEGDYVSTINVSGQKVLKVKRDALKDLAFNAMFDVSHLLRPSHLQQVAKIMKDPEASANDRFVADQFLKNACIAAGRQLPTCQDTGTATVIGKRGKFVWSEGEDEAALSEGICKTYTEKNLRYSQTAPLDMFKEVNTNNNMPAQIDIYGTEGNQYKFLFMAKGGGSANKTMLYQQTKALLNPTSLSSFLKDKIKYLGTAACPPYHVGVTIGGMSADQTLKTAKLASARYYDGLPTNGDKAGRAFRDVEWEEKLTKMAHELGIGAQFGGKYFVHDIRVIRLPRHGASCPVGIAVSCSADRQILAKITEEGVFLEKLETDPAKYMPDLVPGEEMPVVNIDLNQPMTKIRQQLSQHPVSTLFALNGTL…	?	-
	[FeFe] Hydrogenase	HydA	KJ920286,AGA37391	AAO17820.1	?	?	CBK25126	CAMPEP_0198287146	?	?	?	?	?	?	?	GCRY01000252,	-	-	?	?	EAX92779.1	ESU38027.1	?	?	CAMPEP_0202712786	MFLAIAAARRASRGGCLLFNNRLFSRFDNEPLASRINDSFRRSEPRKVETVTITINGKKKVTVPKGTSVLDACRKARCYIPTLCHHPMLTPVGLCRLCLVEVVSPVSGLPNRLIASCASECLDGMSVITESPRLVEAVKTNLKLLRCRHPNQCMTCMANGRCQFQNLVSRYQVLDDFPQLKENSHDLRAHGAIDNSSFALIRDMDKCIACTRCIRACSDVQGMNVYGMTSRGYNERVITIGDLPISQTQCISCGQCTAVCPVGALTERPHLHLVQHALQNKQINNKILVASTAPAVRIGLSEEFYMRPGSVSTGQMVAALRQLGFDYVFDTNFAADLTIAEEAWEFANRVKKGGPFPLFTSCCPGWVNLQEKVYGQLGPYLSSCKSPQAMMGSLVKRFF…	?	-
	Pyruvate:ferredoxin oxidoreductase	PFO	AGA37396,AGA37395	EAL51636.2	?	PNO || CAMPEP_0201489504; probably kinetoplastid	CBK19555	CAMPEP_0198305980, PNO || CAMPEP_0198298222	?	?	?	?	?	?	?	GCRY01000629, GCRY01000732, GCRY01000594	-	-	PNO || CAMPEP_0113752326, CAMPEP_0113772566	PNO || EC675789	EAY09098.1	KWX14957.1	CAMPEP_0114666958	?	PNO || CAMPEP_0202688700, CAMPEP_0202690710	MRLTSKTSAQLSLLRPASRQVLPIFCVQSQNSQMGMKRMSSSCSSSGLCGKSDMVSMHDLLADRKEKIVIKPVTSDTVVKEKPVCMDGNEAAAHVAYAMSEVAFIFPITPASPMGELSDAWSVEKRKNIDGQCLDVVQMQSEGGASAALHGAVAGGAFTTTFTSSQGLLLMIPPMFRVVGELMPCVYHVAARAVTGQGFTIFADHGDVMACRQTGVAMLSSHSVQESMDLALVSHLATLKSKLPFIHFFDGFRTSHEISKITPISYQTIAKLAKDPSIVEAKRLHKQRALHPYHPHHRGNVQPPEVYMSALETANKYYDAAPSIVQSVMDDVARVTGRSYHLFDYVGHPCATRVVVIMGSGSQTVEEVVHQINASDETEKVGVVKVHLYRPWSIDHFLS…	PNO || CAMPEP_0197022220	-
	Hydrogenase maturase protein E	HydE	AGA37362	-	?	?	CBK24998	?	?	?	?	?	?	?	?	GCRY01001851	-	-	?	?	EAY14531.1	-	?	?	CAMNT_0049365101	MLHSVGWKHIIRPLEAYLQKAIVPGEPLKELKAETIAFLLQVKDAQIENALRALSNSITERFFGNKVFFRGIVEFSNVCQKNCFYCGIRRDINDPLSGSSINTPGPTVVRYTMRKQEIVDCALSAYQQQFGSLMLQSGEIVTEERLAFLEDVIRTIRQQTVELEKKQAPHSCVGNPNHLKPSHPIPHYGKGLAVALSVGELDAPAYQRLFAAGAHRYLLRIETSNPALYSSLHPHDSLHRFHNRVNCLKQLKAIGFQLGTGVMIGLLGQTVMDLANDLLFFRSIRADMIGMGPYIVARNTPLAERYEKELDFMSRMNTLTLQKDKVQLRKKWQDNAFNLSIRMIMLARILLGNINISATTALQVLNPSGREIALSSGANVVMPILTPQHFRERYTLYGD…	?	-
	Hydrogenase maturase protein F	HydF	?	-	?	?	-	?	?	?	?	?	?	?	?	GCRY01008559	-	-	?	?	EAX96252.1	-	?	?	?	MRLFGSVASRHVHAVRVIRTNVGVFGAMNSGKSMLVNALTQQPTSIVDMTPGTTADPKIALIEIHRLGPAKIIDTPGIDERGPLGAKKKEKAFSCLKDSNVLLVVVDPFEKQSIVSAKEIIDYAKLNFILSPPTSSSSSSSPSSSSLSSSVSTSSVSSSLSSRSSSHSKAHDTGNKPKKTLLIIYNLFADKFTNWRNEEKQNGRSDRLNELIEKIETSELGLQCFPFSSCFVDLSQQSVSGKRIASFIEQHVRPVASSLSLFPPSLMNTIKQLSLSSCCSFSTSSSLSSASLSSVVPSPIVFLNIPLDDESPSSRLLRPQSMCQEALLREFVSTFAYRMNLTKGRSPILHKRQHEERRFRSTLHMLLNGDADDGRGPLHMDDNINNSTVALPRSRLSLL…	?	-
	Hydrogenase maturase protein G	HydG	?	-	?	?	-	?	?	?	?	?	?	?	?	GCRY01000488	-	-	?	?	EAX97129.1	-	?	?	CAMPEP_0202731090	ENEIQNEIEALQRQGHRRVLLLTGESPMFSFDRFLQAVHTVANVKTKPFGSIRRINVEIPPLSVSDFRRLKATNHVGTYTLFQ	?	-

## Sheet: Mitochondrial Targeting
		Accession Number	Taxonomic ranking	Database	Complete	MitoProt	MitoProt MTS	TargetP	TargetP MTS	MitoFates	Sequence
	Mastigamoeba balamuthi	KM186976	108607	Genbank nr	Complete	0.8324	MLRSTFASRVAFAPLCAALPPRRTSLARFCSPAPAAAPSLARPRP	0.918	MLRSTFASRVAFAPLCAALPPRRTSLARFCSPAPAAAPSLARPRPWTAAPPKTPSTA	0.849	MLRSTFASRVAFAPLCAALPPRRTSLARFCSPAPAAAPSLARPRPWTAAPPKTPSTAPTRSACSATNGAAAVAAGLPKGAQTVIDVYSWAYVNPRCVRFFDRDLCVGVILWFYHRALQREVFRSVARGTGRVLQANSVYGSYIPNLAAHLGPGCRALDVVDVMPIQVESVRRKLKRFPFARAWVDDATVVRADEPYDAVVSYFLHHELPDADKRQATDNLLGNVAPGGRAVFVEYHRMAWWHPLRVVMWAVWALLEPFAAVMQTVDSVRDWASPDVAAKFQWSKRTLFWGMYQVTTARRID
	Neoparamoeba aestuarina	CAMPEP_0201515656		MMETSP/CAMERA	Complete	0.709	MMPFIPPPHSLRLLGSAVSQT	0.66	-	0.489	MMPFIPPPHSLRLLGSAVSQTSSFLSPVQPTFFCRRHFHRTLETDKPVSSPLLETPKYMREVYTFWYRTEKNFSFLDKESVVNTLLWGHADLLEGTVVSLIKPGDRVLQTGATYGELTSKSAKSVGQAGLFDCIDITPIQVDLHNKKLKGFPQARVRVANVVNPQLPNEEQYDLTYSFMLFHELPTEYKSKAATAILESLKPQGKALFIDYHRPSFFPLRAYLTTIFAVFEPFGFEMYKKNFWEFGDEKISSEFNW
	Paramoeba atlantica	CAMPEP_0201483178		MMETSP/CAMERA	Incomplete	-	-	-	-	-	MNEKNIPFLDHEEIVNSILWGKAERLENMVTDSIQPGDRVLQAGATYGNLTTKGSKAVGSSGLFDVVDITPIQVALHSEKLQQFPQARVRVGNANEPHIHGEPLYDLSFTFMLLHELPENMKDEVVSAILNSVKVGGKVMFIDYHRPSFLPLHLYLLTIFRVFEPFGFQMMKQNIQEFADPAIASKFEWTKSTIFQDMFQIVTATRKE
	Blastocystis sp.	CBK21438		Genbank nr	Complete	0.9684	MFVLRSLSQKTAPLAVNGLKTMLRRT	0.868	MFVLRSLSQKTAPL	0.999	MFVLRSLSQKTAPFAVNGLKTMLRRTTPAMQQIAPVVYTKEQRPVPEDYRVPDYMEKIYTWCYVKPKNVK MLDRQLVVQAILFGYFQPLANMVCEELKPGQKLLQCGSTYGKLVATVSKKLGPTGTYNCCDIMPIQVASC NRKMSQYPCNGGCILEDAATHHPEEDKAYDAALSFLLLHEVPDDTKYKVINRIMMSVPVGGKAIFIEYHK PAWYSPWRYMMPIVYWLLEPLAFPVWHHQITELGDPELVKKFKWRKELRFMGLYQKLVGVRVED
	Attheya septentrionalis	CAMPEP_0198293608		MMETSP/CAMERA	Incomplete	0.9969	MLSSRNSLSLLAAHQFRVLAVRSLSTTSPCISQLSCSFTHNPSQSQIRR	0.94	MLSSRNSLSLLAAHQFRVLAVRSLSTTSPCI	0.986	MLSSRNSLSLLAAHQFRVLAVRSLSTTSPCISQLSCSFTHNPSQSQIRRTTKRLAWQRIDKLKLSDTAHDKSYLHNPSQLQTSTLGISPCLHPNPPIPNYLENFYWWAYVSPSMIRTLDRKFLVDIVLWGNFSRLRDAALTELCKFSSSNMIEGKTLQLSCVYANLTEHLVERLSPDATLDVVDVVPAQLENLERKLHRSNSIKNNQVTLSCYDAIDLDGFDDETFDQVLLFFLLHETPDDVRRKALTEACRVLRPNGGKLTIIDYHRPKSKLWQFIMSTMYRIYEPFAYDLWDHDLQQWFPESMREKETKKVTFFGGLYQK
	Staurosira complex	CAMPEP_0202500160		MMETSP/CAMERA	Incomplete	-	-	-	-	-	LRDSYWWAYGNPFCIRALDHKFLVNLVLWGNYERLRDACMNELFDNDSLLVNGRTLQVACVYSDFTQSLAKRLLKASSSLSFDVVDVIPDQLENLKRKLPNAKNVTLTCNDAQDLQFRNETFHRVVLFFLLHEMPNEVRIQTLRQAMRVLQPGGKLVILDYHEPHSWYWKSIMSGMFRLYEPFAKDLWKHEVEEWLPTSDEYQYNISKEEYFDGLYQKVVVRKDSSHLN
	Condylostoma magnum	CAMNT_0008288353		this study	Complete	0.9182	MSLRKLLVQNSRRSFSKDRRSF	0.878	MSLRKLLVQNSRRSF	0.939	MSLRKLLVQNSRRSFSKDRRSFSQIADQQPKMPKYLEDTYWWAYTHPNAPYVFEREWLVNLILWGNFKFLRDSALSEIQNPGQLLQVACVYGNFTQKLVEKFPSPTQIHVIDVSPVQLSNLNKKLGMQKQNVKLSLQDSSDLQYEDNSFESVVVFFLLHEMPHDVRQKTIHQAIRVLKPGGKIVFVDYHSAQLYNPFKYIMYPVLKYLEPFALDLVAREIYDYFPGGVSYTKETFFGGLYQKVVVTKDQTN
	Fabrea fabrea salina	CAMPEP_0202430720		MMETSP/CAMERA	Complete	0.7987	-	0.596	MQFGYSRARVKQNSLPQFLRQ	0.05	MQFGYSRARVKQNSLPQFLRQKKILPDVYLQKPELPKYLTETYWWAYVHPNAVWVFERQWLVNAILWGNFNHLRDTALSEFTSSGKILQVACVYGNFTEKLAQQVDTQSEIHVVDVADVQLENLRKKVNNFSNVKLHQQDSNAMTFEDGSFDNVILFFLLHEQPEYARQLSIQEAVRVCKPGGKVVFIDYHKPYAYNPFRYVMYPVLKYLEPFALDLWQKDLETWIPEVSSIQKELYFGGLYQKDLETWIPEV
	Blepharisma japonicum	CAMNT_0049647487.CAMNT_0049646845		MMETSP/CAMERA	Incomplete	-	-	-	-	-	MARSFADKRSYSRVPAKAPEMPKYLTETYWWAYVHPNAVWFFERQLVNLILWGNFNRLRDHALREINFPSKTLQVACVYGNFTEELARLSNSDSEVHVVDVAEIQLENLREKCKNVKNLHVHHQDSTNLAFEDSAFDNTVVYFLLHEQPEEARKLTVQEAVRVTKPGGKVVFIDYHGPSRLNPFRYVMIPILKNLEPFALDMWKKEIKDWLPPVTDISKVTYFGGLYQKVVVK
	Synedropsis recta	CAMNT_0006981387		MMETSP/CAMERA	Incomplete	-	-	-	-	-	HPPLPLLTRNFSTVALEHHHESPPATTTTIRTTYEPPIPNYLTDVYWWAYVQKSSIRFLDNQFLVNMVLWGNANTLRNAALEKLEDSGRTLQVACVYGNFTEGLVSRLQHSSVDVIDVVPEQLNGLKRKIDHLNSS
	Climacostomum virens	CAMNT_0052064891		MMETSP/CAMERA	Complete	0.993	MRSALRLSFSARSFSSRTTSK	0.895	n.d	0.969	MRSALRLSFSARSFSSRTTSKVSLSEDVRTPEYLQETYWWAYLHPKGVQLFRQQWLVNAILWGNFARLRDSNIANVLPGRVLQVACVYGHFTEALAAALPKDSEVTVIDVAQIQLNNLSERVKDIPNVLLCQQDSTKLQYQDNSFDSVVLFFLLHEQPEEVRKQTINEALRVTRPGGRVVITDYHKPELWNPMRLIMYPVLKYLEPFAMDLWRTELSSYMPSAVSSEKTTSFGGLYQQVIVHNHK.
	Monosiga ovata	DC491179.1		Genbank EST	Incomplete	-	-	-	-	-	FRLPFIGHFPHAMAAAPRRAMAVIRALHSLSRPSASAPITALARAGSPSSPCVRLQASLTTHTAQRAAAALAAPATPTYLSETYWWAYVDPRAVTVFERQWLVNAILFGNFGRLRDAALAELAPRAGGRTLQVACVYGDFTPRLVGEVARCGGALDVVDVLAVQLDNLASKLAEDAPATLHQENSASLSFSSGSFDQTVLFFLLHEMPETVRRATVAEALRVLRPGGRLVIVDYHRPSSLNPLRYLFAPILDVLEPFA
	Pygsuia biforma	GCRY01000773		Genbank SRA	Complete	0.9919	MNSLRITSLQRCCSIGFRQFSSLRNTFGCRSFLHSSKFF	0.958	MNSLRITSLQRCCSIGFRQFSSLRNTFGCRSFLHSSKFF	0.886	MNSLRITSLQRCCSIGFRQFSSLRNTFGCRSFLHSSKFFHSTTVRGNDKEELPEYMANTYHWAYVNPRNVALLDNNFVVNTILFGNYIRIQNFALSEIKQGDQVFMPASVYGSACRNIAKAVGEAGRLDIIDISPIQVVRNTRKLSRYPQVTVLRGDARSFDLQAAYDVACSFMLLHEIPDENKSSVVNNVLNSVKVGGKAVFIDYGRPSTLHPVRPILSFVNDWLEPWAKTLWAHPISSFAAPESQDHFVWETERTIFGGVYQKVVAHRIA
	Eutriptiella gymnastica	CAMPEP_0113734402		MMETSP/CAMERA	Complete	0.9955	MSAFAKRAFTRSGYQALANPVWRSRVNPATPFGVYRA	0.922	MSAFAKRAFTRSGYQA	0.890	MSAFAKRAFTRSGYQALANPVWRSRVNPATPFGVYRAQSTSTAASSSPLARPEQLDAKFTKDVPDYMTDIYTWAYVNPTNVKLLDSQLVVDVLLFFNARALERAVLAHLDPGCKAIQVGHTHGGLVPKAAQQVGPQGDFSVVDVTPIQVQHAEEKVKDSPWCKVRLGDACIPEMILPADETPHDVAYAFMILHEVPDYRKYQIVNNMLKSVRKGGTVVWVEYHGPPYWYNPTRYFMPFVFKWLEPFALVLWDREIESFADEELKKQFKWSKEVYGGNLYQVVVAKHIE
	Euglena gracilis	isotig01902		Genbank EST. this study	Complete	0.9697	MKHAAQRLFRPAHPLLLLRS	0.886	MKHAAQRL	0.983	MKHAAQRLFRPAHPLLLLRSTPKQATSSARPTISSIMARHDELDSRFTKDVPHYMTDIYTWAYVNPTNVRLLDNQYVVDTLLFFNARALEREVLGRLSPGCKAIQVGHTHGGLVPKAAAAIGEAGDFTVVDVTPIQADHAQVKLQASPWSRVRLGDACLMENILPSGEKPHDVAYAFMILHEVPDDRKHQIVNNMLKSVKTGGTVMWVEYHGPPYWFNPTRYFMPFVFRWLEPFALRMWDTEIESFADAELRKQFKWSKVTYGGNLYQVVVAEHIA
	Sorites sp.	CAMNT_0001913855		MMETSP/CAMERA	Incomplete	-	-	-	-	-	MILNDDIKRSRNINDKERLSFKVNMHKPKVMLQDNLDDGLIPEYLDETYWWAYTNKWAVKVWERQWLVDSILWGNFKYLRNDALKELESICDDKNSDSKHVNILQIACVYGNFSQKVAKILCDINIKYGYNIKYNIVDIAPVQLINTKNKLDSYIDDNGIRGNINIELYQQNSSNLMYNNDSIDIIYLFFLLHEQPLNIRIKTINESL
	Reticulomyxa filosa	ETO28810		Genbank nr	Complete	0.6108	-	0.82	-	0.078	MSLGRCSKVVTRELHCKRQESRIHTTSLSPVGVTIKVPKQTDFVDAGVRLICQGRTHCDPDQDSNMTHWEQDIIPEYLHHTYWWAYLHPQAVRFWERQWLVNLILWGNFNALREEALRHVQDHFLNGESGTKNILQIACVYGNLSEHLVSKILLNRNNKQQSTSDSKYNYHIVDIAPIQLKNTFEKLAYRIERLNPKTLTVNKNDYNRSSVDILLDQQNSSQLSFETGSMDCVLLFFLLHEQPLDVRVKTLNEAIRVMKDELIIVDYHQPVHRLNPWKYFMKQVLTRLEPFAMDLWNHDISQWIDPHYRSQVHIAEKKLYFDGLYQKVVIRKIEQKDTSDHSTA
	Elphidium margaritaceum	CAMPEP_0202694266		MMETSP/CAMERA	Complete	0.9908	MLKSLMHGQRPLHRVLTRSKLMHMYVNGQPCTHHLQPLRSLRYKHLGASQVRS	0.881	MLKSLMHGQRPLHRVLTRSKLMHMYVNGQPCTHHLQPLRSLRYKHLGASQVRS	0.592	MLKSLMHGQRPLHRVLTRSKLMHMYVNGQPCTHHLQPLRSLRYKHLGASQVRSQSTLQAQIELDHRTQQHQQRQQHQQHCQQPQQQQQTQSEDRIVATIQSDLQESMIPSYLEETYWWAYTTEAAVRFWERQWLVDAILWGNFNALKTEAIKEAIHSHAQQHLAEQTSFSVTQIACVYGNFSTDLIATLLAQEDDQRCACRYNIIDVAPVQLQNTKSKIDAFLTTHSDTKKNGAHMDMNIDLLQSDSSDMSAAMSDDTQDISYLFFLLHEQPKHVRLQTLAETIRITKENGKIVIVDYHKPTSNVNPFRYIMYPILTYLEPFAIDLWREPISDYIEDLNXEAQLAHHHGEETIFPWTLSEDSAHQTNNMNIGLLDKENATLTDSS
	Ammonia sp.	CAMPEP_0197027732		MMETSP/CAMERA	Complete	0.5539	MPANNTSSTATTASHTGSTHSGIHTRF	0.554	-	0.004	MPANNTSSTATTASHTGSTHSGIHTRFATELNDELIPNYLHDTYWWAYTNPNAVKFWERQFLVDAILWGNFNTLKKQAIHELHALLASQPYQVHSKQRNYRLRVTQIACVYGNFSTDLIAELASIYKYNKMDDAKYTYKIVDIAPIQLVNTKQKIDRYLTEHRVSDHEQWTNAALDVELYQSDSMDLQVMHDGSEDITYLFFLLHEQPKEVRLKTLAEAIRITKPGGRIVIVDYHKPTSQVNPFRYIMYPILTYLEPFAIDLWNEEITDYIRDLSVGQQWNVQMEKTLFFNGLYQKIVLRKGGT
	Brevimastigamonas motovehicularus	PRJNA336189		Genbank	Complete	0.9988	MLRTLKSLPRCLSRAITCTPSFIRSRF	0.96	MLRTLKSLPRCLSRAITCTPSF	0.998	MLRTLKSLPRCLSRAITCTPSFIRSRFSSSTITAPPITTTTPPVVSGPQEKKIEIPSYLKNVYTWAYLHPWSVENLDNQVVVDVILFLNARRLIRGALKEFPSGQKIRVLQPAAVYGWLSGLFAEHLGPNAELIVSDIAPVQVEHTARKLANHKNARVIQADARYPKEGPYDGVLCFMLLHEVPNDYKTAIIDAMLKNCKPGGKVVFVEYGPPHWLHPCKPILKFVNGWLEPFACDLWKNEIKSYCTPSLAEKFDWAPVKRVFGGVYQRVVVTPKPGWQACPPKEP
	Proteromonas lacertae	SAMN06926116		Genbank	Incomplete gene model	-	-	-	-	-	TPEGYEIPDYMKQIYDIWYVRPNRVKLLDRQIVVQTILFGYFGTLCRMLIDELVPGNNVLQLGSTYGKLTPEVAKFLGPKGEYHVEDILPIQVASCNRKMSQYPVKGGCILNDAANDPGDQENITSYMLFHEITDDRKTKVINRMMKSVKPGGKVICIEYHMPYPLRPWMKFIWWWLEP LAFGCLNRELYEMGDPELAKQFTWRKELRCQGLYQKLVGIKKI
	Copromyxa protea	797308648		This study	Complete	0.8457	MHSLSKRISTFSQVPIKRSRV				MHSLSKRISTFSQVPIKRSRVCSTVTSHKIVPKALPLPSYLVNTYTWAYLTPSSLLLDNAVVPNAILWGNMDKLVQSSVAEFKEGDRVLQAANAYGHLGPTLAAKLGSKGFLDLIDIAEIQVQHATEKLSQFPQVRVRQADAAHPGDEIYDAALCFFLLHEVPDDYKVSIVNALMDRVKPGGKVVFIDYHLPVIYHPLRPLMMMVFKFLEPYAVGLIRKEILDFVSENNKPIFKWEKETFFGGLYQKVIATKSE

## Sheet: Redox half reactions
Reaction	Midpoint potential	Catalyzed by	ref
NAD+ + 2H+ + 2 e– --> NADH + H+	-320	CI	Segel (1977) Biochemical calculations: how to solve mathematical problems in general biochemistry. Bioelectrochemistry Bioenerg 4(1):112.
S2O32- + 2H+ + 2e- --> 1-2 S2-	-280	SQR	Mishanina T V., Yadav PK, Ballou DP, Banerjee R (2015) Transient kinetic analysis of hydrogen sulfide oxidation catalyzed by human sulfide quinone oxidoreductase. J Biol Chem 290(41):25072–25080.
RQ	-63	CI	Ackrell, Brian AC, et al. "Structure and function of succinate dehydrogenase and fumarate reductase." Chemistry and biochemistry of flavoenzymes 3 (1992): 229-297.
ETF (ox)+ 2H+ + 2 e' --> ETF (red)	22	ETFDH	Dwyer TM, et al. (1999) The intraflavin hydrogen bond in human electron transfer flavoprotein modulates redox potentials and may participate in electron transfer. Biochemistry 38(30):9735–9745.
fumarate + 2H+ + 2e- --> succinate	30	CIII	Segel (1977) Biochemical calculations: how to solve mathematical problems in general biochemistry. Bioelectrochemistry Bioenerg 4(1):112.
UQ + 2H+ + 2 e- --> UQH2	100	CI,CII	Ackrell, Brian AC, et al. "Structure and function of succinate dehydrogenase and fumarate reductase." Chemistry and biochemistry of flavoenzymes 3 (1992): 229-297.
Dihydroxyacetonephosphate + 2H+ +2e- --> glycerol-3-phosphate	193	G3PDH	Tielens AGM, Rotte C, Van Hellemond JJ, Martin W (2002) Mitochondria as we don’t know them. Trends Biochem Sci 27(11):564–572.
cytochrome c (Fe3+) + e- --> cytochrome c (Fe2+)	250	CIII	Segel (1977) Biochemical calculations: how to solve mathematical problems in general biochemistry. Bioelectrochemistry Bioenerg 4(1):112.
1/2 Oxygen + 2H+ + 2e- --> H2O	816	CIV,AOX	Segel (1977) Biochemical calculations: how to solve mathematical problems in general biochemistry. Bioelectrochemistry Bioenerg 4(1):112.

## Sheet: Bacterial_genes_with_linkage
Gene position and genetic linkage	RQUA linked to the following respiration complexes	RQUA accession number	Protein accession of neighbouring genes	Gene from respiratory function	PFAM domains		Genbank Annotation
COMPLEX I & COMPLEX II
-15	Complex I & Complex II	KJS40230	KJS40218.1		No Hit;		hypothetical protein VR70_06185 [Rhodospirillaceae bacterium BRH_c57]
-14	Complex I & Complex II	KJS40230	KJS40252.1		No Hit;		hypothetical protein VR70_06195 [Rhodospirillaceae bacterium BRH_c57]
-13	Complex I & Complex II	KJS40230	KJS40219.1		No Hit;		hypothetical protein VR70_06200 [Rhodospirillaceae bacterium BRH_c57]
-12	Complex I & Complex II	KJS40230	KJS40253.1		PF16083.3@Phage_holin_3_3@LydA holin phage, holin superfamily III;		hypothetical protein VR70_06205 [Rhodospirillaceae bacterium BRH_c57]
-11	Complex I & Complex II	KJS40230	KJS40220.1		PF00959.17@Phage_lysozyme@Phage lysozyme;		hypothetical protein VR70_06210 [Rhodospirillaceae bacterium BRH_c57]
-10	Complex I & Complex II	KJS40230	KJS40221.1		No Hit;		hypothetical protein VR70_06215 [Rhodospirillaceae bacterium BRH_c57]
-9	Complex I & Complex II	KJS40230	KJS40222.1		PF07087.9@DUF1353@Protein of unknown function (DUF1353);		hypothetical protein VR70_06220 [Rhodospirillaceae bacterium BRH_c57]
-8	Complex I & Complex II	KJS40230	KJS40223.1		No Hit;		hypothetical protein VR70_06225 [Rhodospirillaceae bacterium BRH_c57]
-7	Complex I & Complex II	KJS40230	KJS40224.1		PF04102.10@SlyX@SlyX;		hypothetical protein VR70_06230 [Rhodospirillaceae bacterium BRH_c57]
-6	Complex I & Complex II	KJS40230	KJS40225.1		PF04143.12@Sulf_transp@Sulphur transport;		hypothetical protein VR70_06235 [Rhodospirillaceae bacterium BRH_c57]
-5	Complex I & Complex II	KJS40230	KJS40226.1		No Hit;		hypothetical protein VR70_06240 [Rhodospirillaceae bacterium BRH_c57]
-4	Complex I & Complex II	KJS40230	KJS40254.1	SDHD/FRDD	PF02313.15@Fumarate_red_D@Fumarate reductase subunit D;		hypothetical protein VR70_06245 [Rhodospirillaceae bacterium BRH_c57]
-3	Complex I & Complex II	KJS40230	KJS40227.1	SDHC/FRDC	PF02300.15@Fumarate_red_C@Fumarate reductase subunit C;		hypothetical protein VR70_06250 [Rhodospirillaceae bacterium BRH_c57]
-2	Complex I & Complex II	KJS40230	KJS40228.1	SDHV	PF13085.4@Fer2_3@2Fe-2S iron-sulfur cluster binding domain;PF13183.4@Fer4_8@4Fe-4S dicluster domain;PF13237.4@Fer4_10@4Fe-4S dicluster domain;		fumarate reductase [Rhodospirillaceae bacterium BRH_c57]
-1	Complex I & Complex II	KJS40230	KJS40229.1	SDHA/FRDA	PF00890.22@FAD_binding_2@FAD binding domain;PF02910.18@Succ_DH_flav_C@Fumarate reductase flavoprotein C-term;PF01946.15@Thi4@Thi4 family;PF07992.12@Pyr_redox_2@Pyridine nucleotide-disulphide oxidoreductase;		fumarate reductase [Rhodospirillaceae bacterium BRH_c57]
0	Complex I & Complex II	KJS40230	KJS40230.1	RQUA	No Hit;		methyltransferase [Rhodospirillaceae bacterium BRH_c57]
1	Complex I & Complex II	KJS40230	KJS40255.1		PF03364.18@Polyketide_cyc@Polyketide cyclase / dehydrase and lipid transport;PF10604.7@Polyketide_cyc2@Polyketide cyclase / dehydrase and lipid transport;		hypothetical protein VR70_06270 [Rhodospirillaceae bacterium BRH_c57]
2	Complex I & Complex II	KJS40230	KJS40231.1	Complex I	PF00507.17@Oxidored_q4@NADH-ubiquinone/plastoquinone oxidoreductase, chain 3;		NADH:ubiquinone oxidoreductase subunit A [Rhodospirillaceae bacterium BRH_c57]
3	Complex I & Complex II	KJS40230	KJS40232.1	Complex I	PF01058.20@Oxidored_q6@NADH ubiquinone oxidoreductase, 20 Kd subunit;		NADH dehydrogenase [Rhodospirillaceae bacterium BRH_c57]
4	Complex I & Complex II	KJS40230	KJS40233.1	Complex I	PF00329.17@Complex1_30kDa@Respiratory-chain NADH dehydrogenase, 30 Kd subunit;		NADH dehydrogenase [Rhodospirillaceae bacterium BRH_c57]
5	Complex I & Complex II	KJS40230	KJS40234.1	Complex I	PF00346.17@Complex1_49kDa@Respiratory-chain NADH dehydrogenase, 49 Kd subunit;		NADH dehydrogenase [Rhodospirillaceae bacterium BRH_c57]
6	Complex I & Complex II	KJS40230	KJS40235.1	Complex I	PF01257.17@2Fe-2S_thioredx@Thioredoxin-like [2Fe-2S] ferredoxin;		NADH dehydrogenase [Rhodospirillaceae bacterium BRH_c57]
7	Complex I & Complex II	KJS40230	KJS40236.1	Complex I	PF01512.15@Complex1_51K@Respiratory-chain NADH dehydrogenase 51 Kd subunit;PF10589.7@NADH_4Fe-4S@NADH-ubiquinone oxidoreductase-F iron-sulfur binding region;PF10531.7@SLBB@SLBB domain;		NADH dehydrogenase [Rhodospirillaceae bacterium BRH_c57]
8	Complex I & Complex II	KJS40230	KJS40237.1	Complex I	PF00384.20@Molybdopterin@Molybdopterin oxidoreductase;PF13510.4@Fer2_4@2Fe-2S iron-sulfur cluster binding domain;PF10588.7@NADH-G_4Fe-4S_3@NADH-ubiquinone oxidoreductase-G iron-sulfur binding region;PF09326.9@NADH_dhqG_C@NADH-ubiquinone oxidoreductase subunit G, C-terminal;PF00111.25@Fer2@2Fe-2S iron-sulfur cluster binding domain;		NADH dehydrogenase [Rhodospirillaceae bacterium BRH_c57]
9	Complex I & Complex II	KJS40230	KJS40238.1	Complex I	PF00146.19@NADHdh@NADH dehydrogenase;		NADH:ubiquinone oxidoreductase subunit H [Rhodospirillaceae bacterium BRH_c57]
10	Complex I & Complex II	KJS40230	KJS40239.1	Complex I	PF00037.25@Fer4@4Fe-4S binding domain;PF12838.5@Fer4_7@4Fe-4S dicluster domain;PF13484.4@Fer4_16@4Fe-4S double cluster binding domain;PF14697.4@Fer4_21@4Fe-4S dicluster domain;PF13183.4@Fer4_8@4Fe-4S dicluster domain;PF13237.4@Fer4_10@4Fe-4S dicluster domain;PF13187.4@Fer4_9@4Fe-4S dicluster domain;PF12797.5@Fer4_2@4Fe-4S binding domain;PF12837.5@Fer4_6@4Fe-4S binding domain;PF12800.5@Fer4_4@4Fe-…		NADH dehydrogenase [Rhodospirillaceae bacterium BRH_c57]
11	Complex I & Complex II	KJS40230	KJS40240.1	Complex I	PF00499.18@Oxidored_q3@NADH-ubiquinone/plastoquinone oxidoreductase chain 6;		NADH:ubiquinone oxidoreductase subunit J [Rhodospirillaceae bacterium BRH_c57]
12	Complex I & Complex II	KJS40230	KJS40241.1	Complex I	PF00420.22@Oxidored_q2@NADH-ubiquinone/plastoquinone oxidoreductase chain 4L;		NADH-quinone oxidoreductase subunit K [Rhodospirillaceae bacterium BRH_c57]
13	Complex I & Complex II	KJS40230	KJS40242.1	Complex I	PF00361.18@Proton_antipo_M@Proton-conducting membrane transporter;PF00662.18@Proton_antipo_N@NADH-Ubiquinone oxidoreductase (complex I), chain 5 N-terminus;PF06455.9@NADH5_C@NADH dehydrogenase subunit 5 C-terminus;		NADH:ubiquinone oxidoreductase subunit L [Rhodospirillaceae bacterium BRH_c57]
14	Complex I & Complex II	KJS40230	KJS40256.1	Complex I	PF00361.18@Proton_antipo_M@Proton-conducting membrane transporter;PF01059.15@Oxidored_q5_N@NADH-ubiquinone oxidoreductase chain 4, amino terminus;		NADH-quinone oxidoreductase chain 13 [Rhodospirillaceae bacterium BRH_c57]
15	Complex I & Complex II	KJS40230	KJS40243.1	Complex I	PF00361.18@Proton_antipo_M@Proton-conducting membrane transporter;		NADH-quinone oxidoreductase subunit N [Rhodospirillaceae bacterium BRH_c57]
-15	Complex I & Complex II	WP_019643592	WP_019643576.1		PF00926.17@DHBP_synthase@3,4-dihydroxy-2-butanone 4-phosphate synthase;		3,4-dihydroxy-2-butanone-4-phosphate synthase [Novispirillum itersonii]
-14	Complex I & Complex II	WP_019643592	WP_081628386.1		PF00012.18@HSP70@Hsp70 protein;		Hsp70 family protein [Novispirillum itersonii]
-13	Complex I & Complex II	WP_019643592	WP_081628387.1		PF00710.18@Asparaginase@Asparaginase, N-terminal;		asparaginase [Novispirillum itersonii]
-12	Complex I & Complex II	WP_019643592	WP_019643580.1		PF02384.14@N6_Mtase@N-6 DNA Methylase;PF07669.9@Eco57I@Eco57I restriction-modification methylase;PF12950.5@TaqI_C@TaqI-like C-terminal specificity domain;		hypothetical protein [Novispirillum itersonii]
-11	Complex I & Complex II	WP_019643592	WP_026344983.1		PF01266.22@DAO@FAD dependent oxidoreductase;		FAD-dependent oxidoreductase [Novispirillum itersonii]
-10	Complex I & Complex II	WP_019643592	WP_019643582.1		PF07905.9@PucR@Purine catabolism regulatory protein-like family;PF13556.4@HTH_30@PucR C-terminal helix-turn-helix domain;		PucR family transcriptional regulator [Novispirillum itersonii]
-9	Complex I & Complex II	WP_019643592	WP_019643583.1		No Hit;		hypothetical protein [Novispirillum itersonii]
-8	Complex I & Complex II	WP_019643592	WP_019643584.1		PF01921.16@tRNA-synt_1f@tRNA synthetases class I (K);		lysine--tRNA ligase [Novispirillum itersonii]
-7	Complex I & Complex II	WP_019643592	WP_019643585.1		No Hit;		hypothetical protein [Novispirillum itersonii]
-6	Complex I & Complex II	WP_019643592	WP_019643586.1		No Hit;		hypothetical protein [Novispirillum itersonii]
-5	Complex I & Complex II	WP_019643592	WP_019643587.1		PF04102.10@SlyX@SlyX;		hypothetical protein [Novispirillum itersonii]
-4	Complex I & Complex II	WP_019643592	WP_019643588.1	SDHD/FRDD	PF02313.15@Fumarate_red_D@Fumarate reductase subunit D;PF01127.20@Sdh_cyt@Succinate dehydrogenase/Fumarate reductase transmembrane subunit;		hypothetical protein [Novispirillum itersonii]
-3	Complex I & Complex II	WP_019643592	WP_019643589.1	SDHC/FRDC	PF02300.15@Fumarate_red_C@Fumarate reductase subunit C;		hypothetical protein [Novispirillum itersonii]
-2	Complex I & Complex II	WP_019643592	WP_019643590.1	SDHB/FRDB	PF13085.4@Fer2_3@2Fe-2S iron-sulfur cluster binding domain;PF13183.4@Fer4_8@4Fe-4S dicluster domain;PF13237.4@Fer4_10@4Fe-4S dicluster domain;PF12838.5@Fer4_7@4Fe-4S dicluster domain;		succinate dehydrogenase/fumarate reductase iron-sulfur subunit [Novispirillum itersonii]
-1	Complex I & Complex II	WP_019643592	WP_019643591.1	SDHA/FRDA	PF00890.22@FAD_binding_2@FAD binding domain;PF02910.18@Succ_DH_flav_C@Fumarate reductase flavoprotein C-term;		fumarate reductase (quinol) flavoprotein subunit [Novispirillum itersonii]
0	Complex I & Complex II	WP_019643592	WP_019643592.1	RQUA	PF13649.4@Methyltransf_25@Methyltransferase domain;		class I SAM-dependent methyltransferase [Novispirillum itersonii]
1	Complex I & Complex II	WP_019643592	WP_019643593.1	UBI binding protein	PF03364.18@Polyketide_cyc@Polyketide cyclase / dehydrase and lipid transport;PF10604.7@Polyketide_cyc2@Polyketide cyclase / dehydrase and lipid transport;		ubiquinone-binding protein [Novispirillum itersonii]
2	Complex I & Complex II	WP_019643592	WP_019643594.1	Complex I	PF00507.17@Oxidored_q4@NADH-ubiquinone/plastoquinone oxidoreductase, chain 3;		NADH-quinone oxidoreductase subunit A [Novispirillum itersonii]
3	Complex I & Complex II	WP_019643592	WP_081628388.1	Complex I	PF01058.20@Oxidored_q6@NADH ubiquinone oxidoreductase, 20 Kd subunit;		NADH dehydrogenase [Novispirillum itersonii]
4	Complex I & Complex II	WP_019643592	WP_019643596.1	Complex I	PF00329.17@Complex1_30kDa@Respiratory-chain NADH dehydrogenase, 30 Kd subunit;		NADH-quinone oxidoreductase subunit C [Novispirillum itersonii]
5	Complex I & Complex II	WP_019643592	WP_019643597.1	Complex I	PF00346.17@Complex1_49kDa@Respiratory-chain NADH dehydrogenase, 49 Kd subunit;		NADH-quinone oxidoreductase subunit NuoD [Novispirillum itersonii]
6	Complex I & Complex II	WP_019643592	WP_019643598.1	Complex I	PF01257.17@2Fe-2S_thioredx@Thioredoxin-like [2Fe-2S] ferredoxin;		NAD(P)H-dependent oxidoreductase subunit E [Novispirillum itersonii]
7	Complex I & Complex II	WP_019643592	WP_019643599.1	Complex I	PF01512.15@Complex1_51K@Respiratory-chain NADH dehydrogenase 51 Kd subunit;PF10589.7@NADH_4Fe-4S@NADH-ubiquinone oxidoreductase-F iron-sulfur binding region;PF10531.7@SLBB@SLBB domain;		NADH-quinone oxidoreductase subunit NuoF [Novispirillum itersonii]
8	Complex I & Complex II	WP_019643592	WP_019643600.1	Complex I	PF00384.20@Molybdopterin@Molybdopterin oxidoreductase;PF13510.4@Fer2_4@2Fe-2S iron-sulfur cluster binding domain;PF10588.7@NADH-G_4Fe-4S_3@NADH-ubiquinone oxidoreductase-G iron-sulfur binding region;PF09326.9@NADH_dhqG_C@NADH-ubiquinone oxidoreductase subunit G, C-terminal;PF00111.25@Fer2@2Fe-2S iron-sulfur cluster binding domain;		NADH-quinone oxidoreductase subunit G [Novispirillum itersonii]
9	Complex I & Complex II	WP_019643592	WP_019643601.1	Complex I	PF00146.19@NADHdh@NADH dehydrogenase;		NADH-quinone oxidoreductase subunit NuoH [Novispirillum itersonii]
10	Complex I & Complex II	WP_019643592	WP_019643602.1	Complex I	PF00037.25@Fer4@4Fe-4S binding domain;PF12838.5@Fer4_7@4Fe-4S dicluster domain;PF13484.4@Fer4_16@4Fe-4S double cluster binding domain;PF13183.4@Fer4_8@4Fe-4S dicluster domain;PF14697.4@Fer4_21@4Fe-4S dicluster domain;PF13237.4@Fer4_10@4Fe-4S dicluster domain;PF13187.4@Fer4_9@4Fe-4S dicluster domain;PF12797.5@Fer4_2@4Fe-4S binding domain;PF12800.5@Fer4_4@4Fe-4S binding domain;PF12837.5@Fer4_6@4Fe-…		NADH-quinone oxidoreductase subunit NuoI [Novispirillum itersonii]
11	Complex I & Complex II	WP_019643592	WP_019643603.1	Complex I	PF00499.18@Oxidored_q3@NADH-ubiquinone/plastoquinone oxidoreductase chain 6;		hypothetical protein [Novispirillum itersonii]
12	Complex I & Complex II	WP_019643592	WP_026344985.1	Complex I	PF00420.22@Oxidored_q2@NADH-ubiquinone/plastoquinone oxidoreductase chain 4L;		NADH-quinone oxidoreductase subunit NuoK [Novispirillum itersonii]
13	Complex I & Complex II	WP_019643592	WP_019643605.1	Complex I	PF00361.18@Proton_antipo_M@Proton-conducting membrane transporter;PF00662.18@Proton_antipo_N@NADH-Ubiquinone oxidoreductase (complex I), chain 5 N-terminus;PF06455.9@NADH5_C@NADH dehydrogenase subunit 5 C-terminus;		NADH-quinone oxidoreductase subunit L [Novispirillum itersonii]
14	Complex I & Complex II	WP_019643592	WP_019643606.1	Complex I	PF00361.18@Proton_antipo_M@Proton-conducting membrane transporter;		NADH-quinone oxidoreductase subunit M [Novispirillum itersonii]
15	Complex I & Complex II	WP_019643592	WP_019643607.1	Complex I	PF00361.18@Proton_antipo_M@Proton-conducting membrane transporter;		NADH-quinone oxidoreductase subunit NuoN [Novispirillum itersonii]
-15	Complex I & Complex II	WP_084194489	WP_076398218.1		No Hit;		hypothetical protein [Insolitispirillum peregrinum]
-14	Complex I & Complex II	WP_084194489	WP_084194487.1		PF00440.21@TetR_N@Bacterial regulatory proteins, tetR family;PF13305.4@WHG@WHG domain;		TetR/AcrR family transcriptional regulator [Insolitispirillum peregrinum]
-13	Complex I & Complex II	WP_084194489	WP_076398221.1		PF12804.5@NTP_transf_3@MobA-like NTP transferase domain;		molybdenum cofactor guanylyltransferase [Insolitispirillum peregrinum]
-12	Complex I & Complex II	WP_084194489	WP_076398223.1		PF00072.22@Response_reg@Response regulator receiver domain;PF01627.21@Hpt@Hpt domain;		hypothetical protein [Insolitispirillum peregrinum]
-11	Complex I & Complex II	WP_084194489	WP_076398225.1		PF06965.10@Na_H_antiport_1@Naﱿ� antiporter 1;		Naﱿ� antiporter NhaA [Insolitispirillum peregrinum]
-10	Complex I & Complex II	WP_084194489	WP_084194488.1		PF00501.26@AMP-binding@AMP-binding enzyme;PF13193.4@AMP-binding_C@AMP-binding enzyme C-terminal domain;		hypothetical protein [Insolitispirillum peregrinum]
-9	Complex I & Complex II	WP_084194489	WP_076398226.1		No Hit;		iron-sulfur cluster assembly scaffold protein [Insolitispirillum peregrinum]
-8	Complex I & Complex II	WP_084194489	WP_076398228.1		PF07310.11@PAS_5@PAS domain;PF08448.8@PAS_4@PAS fold;		PAS domain-containing protein [Insolitispirillum peregrinum]
-7	Complex I & Complex II	WP_084194489	WP_076398230.1		PF01580.16@FtsK_SpoIIIE@FtsK/SpoIIIE family;PF09397.8@Ftsk_gamma@Ftsk gamma domain;PF12846.5@AAA_10@AAA-like domain;		cell division protein FtsK [Insolitispirillum peregrinum]
-6	Complex I & Complex II	WP_084194489	WP_076398231.1		No Hit;		hypothetical protein [Insolitispirillum peregrinum]
-5	Complex I & Complex II	WP_084194489	WP_076398233.1		PF04102.10@SlyX@SlyX;		hypothetical protein [Insolitispirillum peregrinum]
-4	Complex I & Complex II	WP_084194489	WP_076398235.1	SDHD/FRDD	PF02313.15@Fumarate_red_D@Fumarate reductase subunit D;PF01127.20@Sdh_cyt@Succinate dehydrogenase/Fumarate reductase transmembrane subunit;		hypothetical protein [Insolitispirillum peregrinum]
-3	Complex I & Complex II	WP_084194489	WP_076398236.1	SDHC/FRDC	PF02300.15@Fumarate_red_C@Fumarate reductase subunit C;		hypothetical protein [Insolitispirillum peregrinum]
-2	Complex I & Complex II	WP_084194489	WP_076398238.1	SDHB/FRDB	PF13085.4@Fer2_3@2Fe-2S iron-sulfur cluster binding domain;PF13183.4@Fer4_8@4Fe-4S dicluster domain;PF13237.4@Fer4_10@4Fe-4S dicluster domain;PF12838.5@Fer4_7@4Fe-4S dicluster domain;PF13187.4@Fer4_9@4Fe-4S dicluster domain;		succinate dehydrogenase/fumarate reductase iron-sulfur subunit [Insolitispirillum peregrinum]
-1	Complex I & Complex II	WP_084194489	WP_076398239.1	SDHA/FRDA	PF00890.22@FAD_binding_2@FAD binding domain;PF02910.18@Succ_DH_flav_C@Fumarate reductase flavoprotein C-term;PF01946.15@Thi4@Thi4 family;PF07992.12@Pyr_redox_2@Pyridine nucleotide-disulphide oxidoreductase;		fumarate reductase (quinol) flavoprotein subunit [Insolitispirillum peregrinum]
0	Complex I & Complex II	WP_084194489	WP_084194489.1	RQUA	PF13649.4@Methyltransf_25@Methyltransferase domain;PF08242.10@Methyltransf_12@Methyltransferase domain;		class I SAM-dependent methyltransferase [Insolitispirillum peregrinum]
1	Complex I & Complex II	WP_084194489	WP_084194490.1	UBI binding protein	PF03364.18@Polyketide_cyc@Polyketide cyclase / dehydrase and lipid transport;PF10604.7@Polyketide_cyc2@Polyketide cyclase / dehydrase and lipid transport;		ubiquinone-binding protein [Insolitispirillum peregrinum]
2	Complex I & Complex II	WP_084194489	WP_076398241.1	Complex I	PF00507.17@Oxidored_q4@NADH-ubiquinone/plastoquinone oxidoreductase, chain 3;		NADH-quinone oxidoreductase subunit A [Insolitispirillum peregrinum]
3	Complex I & Complex II	WP_084194489	WP_076398242.1	Complex I	PF01058.20@Oxidored_q6@NADH ubiquinone oxidoreductase, 20 Kd subunit;		NADH dehydrogenase [Insolitispirillum peregrinum]
4	Complex I & Complex II	WP_084194489	WP_076398244.1	Complex I	PF00329.17@Complex1_30kDa@Respiratory-chain NADH dehydrogenase, 30 Kd subunit;		NADH-quinone oxidoreductase subunit C [Insolitispirillum peregrinum]
5	Complex I & Complex II	WP_084194489	WP_076398245.1	Complex I	PF00346.17@Complex1_49kDa@Respiratory-chain NADH dehydrogenase, 49 Kd subunit;		NADH-quinone oxidoreductase subunit NuoD [Insolitispirillum peregrinum]
6	Complex I & Complex II	WP_084194489	WP_076398247.1	Complex I	PF01257.17@2Fe-2S_thioredx@Thioredoxin-like [2Fe-2S] ferredoxin;		NAD(P)H-dependent oxidoreductase subunit E [Insolitispirillum peregrinum]
7	Complex I & Complex II	WP_084194489	WP_076398249.1	Complex I	PF01512.15@Complex1_51K@Respiratory-chain NADH dehydrogenase 51 Kd subunit;PF10589.7@NADH_4Fe-4S@NADH-ubiquinone oxidoreductase-F iron-sulfur binding region;PF10531.7@SLBB@SLBB domain;		NADH-quinone oxidoreductase subunit NuoF [Insolitispirillum peregrinum]
8	Complex I & Complex II	WP_084194489	WP_076398251.1	Complex I	PF00384.20@Molybdopterin@Molybdopterin oxidoreductase;PF13510.4@Fer2_4@2Fe-2S iron-sulfur cluster binding domain;PF10588.7@NADH-G_4Fe-4S_3@NADH-ubiquinone oxidoreductase-G iron-sulfur binding region;PF09326.9@NADH_dhqG_C@NADH-ubiquinone oxidoreductase subunit G, C-terminal;PF00111.25@Fer2@2Fe-2S iron-sulfur cluster binding domain;		NADH-quinone oxidoreductase subunit G [Insolitispirillum peregrinum]
9	Complex I & Complex II	WP_084194489	WP_076398252.1	Complex I	PF00146.19@NADHdh@NADH dehydrogenase;		NADH-quinone oxidoreductase subunit NuoH [Insolitispirillum peregrinum]
10	Complex I & Complex II	WP_084194489	WP_076398254.1	Complex I	PF00037.25@Fer4@4Fe-4S binding domain;PF12838.5@Fer4_7@4Fe-4S dicluster domain;PF13484.4@Fer4_16@4Fe-4S double cluster binding domain;PF14697.4@Fer4_21@4Fe-4S dicluster domain;PF13183.4@Fer4_8@4Fe-4S dicluster domain;PF13237.4@Fer4_10@4Fe-4S dicluster domain;PF13187.4@Fer4_9@4Fe-4S dicluster domain;PF12837.5@Fer4_6@4Fe-4S binding domain;PF12797.5@Fer4_2@4Fe-4S binding domain;PF12800.5@Fer4_4@4Fe-…		NADH-quinone oxidoreductase subunit NuoI [Insolitispirillum peregrinum]
10	Complex I & Complex II	WP_084194489	WP_076398255.1	Complex I	PF00499.18@Oxidored_q3@NADH-ubiquinone/plastoquinone oxidoreductase chain 6;		NADH:ubiquinone oxidoreductase subunit J [Insolitispirillum peregrinum]
10	Complex I & Complex II	WP_084194489	WP_076398257.1	Complex I	PF00420.22@Oxidored_q2@NADH-ubiquinone/plastoquinone oxidoreductase chain 4L;		NADH-quinone oxidoreductase subunit NuoK [Insolitispirillum peregrinum]
10	Complex I & Complex II	WP_084194489	WP_076398259.1	Complex I	PF00361.18@Proton_antipo_M@Proton-conducting membrane transporter;PF00662.18@Proton_antipo_N@NADH-Ubiquinone oxidoreductase (complex I), chain 5 N-terminus;PF06455.9@NADH5_C@NADH dehydrogenase subunit 5 C-terminus;PF01010.17@Proton_antipo_C@NADH-dehyrogenase subunit F, TMs, (complex I) C-terminus;		NADH-quinone oxidoreductase subunit L [Insolitispirillum peregrinum]
10	Complex I & Complex II	WP_084194489	WP_076398260.1	Complex I	PF00361.18@Proton_antipo_M@Proton-conducting membrane transporter;PF01059.15@Oxidored_q5_N@NADH-ubiquinone oxidoreductase chain 4, amino terminus;		NADH-quinone oxidoreductase subunit M [Insolitispirillum peregrinum]
10	Complex I & Complex II	WP_084194489	WP_076398262.1	Complex I	PF00361.18@Proton_antipo_M@Proton-conducting membrane transporter;		NADH-quinone oxidoreductase subunit NuoN [Insolitispirillum peregrinum]
-15	Complex I & Complex II	SOD93726	SOD93681.1		PF00072.22	Response regulator receiver domain	two component transcriptional regulator, LuxR family [Caenispirillum bisanense]
-14	Complex I & Complex II	SOD93726	SOD93684.1		PF00015.19	Methyl-accepting chemotaxis protein (MCP) signalling domain	Methyl-accepting chemotaxis protein [Caenispirillum bisanense]
-13	Complex I & Complex II	SOD93726	SOD93688.1		PF05698.12	Bacterial trigger factor protein (TF) C-ter-	trigger factor [Caenispirillum bisanense]
-12	Complex I & Complex II	SOD93726	SOD93690.1		PF00574.21	Clp protease	ATP-dependent Clp protease proteolytic subunit ClpP [Caenispirillum bisanense]
-11	Complex I & Complex II	SOD93726	SOD93693.1		PF07724.12	AAA domain (Cdc48 subfamily)	ATP-dependent Clp protease ATP-binding subunit ClpX [Caenispirillum bisanense]
-10	Complex I & Complex II	SOD93726	SOD93697.1		PF05362.11	Lon protease (S16) C-terminal proteolytic domain	ATP-dependent proteinase. Serine peptidase. MEROPS family S16 [Caenispirillum bisanense]
-9	Complex I & Complex II	SOD93726	SOD93700.1		PF00216.19	Bacterial DNA-binding protein	DNA-binding protein HU-beta [Caenispirillum bisanense]
-8	Complex I & Complex II	SOD93726	SOD93702.1		PF02613.13	Nitrate reductase delta subunit	TorA specific chaperone [Caenispirillum bisanense]
-7	Complex I & Complex II	SOD93726	SOD93705.1		No Pfam hit	No Pfam hit	hypothetical protein SAMN05421508_103161 [Caenispirillum bisanense]
-6	Complex I & Complex II	SOD93726	SOD93708.1	SDHD	PF02313.15	Fumarate reductase subunit D	succinate dehydrogenase subunit D [Caenispirillum bisanense]
-5	Complex I & Complex II	SOD93726	SOD93712.1	SDHC	PF02300.15	Fumarate reductase subunit C	fumarate reductase subunit C [Caenispirillum bisanense]
-4	Complex I & Complex II	SOD93726	SOD93714.1	SDHB	PF13085.4	2Fe-2S iron-sulfur cluster binding domain	succinate dehydrogenase subunit B [Caenispirillum bisanense]
-3	Complex I & Complex II	SOD93726	SOD93716.1	SDHA	PF00890.22	FAD binding domain	succinate dehydrogenase subunit A [Caenispirillum bisanense]
-2	Complex I & Complex II	SOD93726	SOD93720.1	Cytochrome b561	PF01292.18	Prokaryotic cytochrome b561	cytochrome b561 [Caenispirillum bisanense]
-1	Complex I & Complex II	SOD93726	SOD93722.1	Cytochrome C	PF11783.6	Cytochrome c bacterial	octaheme c-type cytochrome, tetrathionate reductase family [Caenispirillum bisanense]
0	Complex I & Complex II	SOD93726	SOD93726.1	RQUA	PF13649.4	Methyltransferase domain	Methyltransferase domain-containing protein [Caenispirillum bisanense]
1	Complex I & Complex II	SOD93726	SOD93729.1	COQ10	PF03364.18	Polyketide cyclase / dehydrase and lipid transport	coenzyme Q-binding protein COQ10 [Caenispirillum bisanense]
2	Complex I & Complex II	SOD93726	SOD93732.1	Complex I	PF00507.17	NADH-ubiquinone/plastoquinone oxidoreductase, chain 3	NADH dehydrogenase subunit A [Caenispirillum bisanense]
3	Complex I & Complex II	SOD93726	SOD93735.1	Complex I	PF01058.20	NADH ubiquinone oxidoreductase, 20 Kd subunit	NADH dehydrogenase subunit B [Caenispirillum bisanense]
4	Complex I & Complex II	SOD93726	SOD93737.1	Complex I	PF00329.17	Respiratory-chain NADH dehydrogenase, 30 Kd subunit	NADH dehydrogenase subunit C [Caenispirillum bisanense]
5	Complex I & Complex II	SOD93726	SOD93739.1	Complex I	PF00346.17	Respiratory-chain NADH dehydrogenase, 49 Kd subunit	NADH dehydrogenase subunit D [Caenispirillum bisanense]
6	Complex I & Complex II	SOD93726	SOD93741.1	Complex I	PF01257.17	Thioredoxin-like [2Fe-2S] ferredoxin	NADH dehydrogenase subunit E [Caenispirillum bisanense]
7	Complex I & Complex II	SOD93726	SOD93743.1	Complex I	PF01512.15	Respiratory-chain NADH dehydrogenase 51 Kd subunit	NADH dehydrogenase subunit F [Caenispirillum bisanense]
8	Complex I & Complex II	SOD93726	SOD93745.1	Complex I	PF00384.20	Molybdopterin oxidoreductase	NADH dehydrogenase subunit G [Caenispirillum bisanense]
9	Complex I & Complex II	SOD93726	SOD93747.1	Complex I	PF00146.19	NADH dehydrogenase	NADH dehydrogenase subunit H [Caenispirillum bisanense]
10	Complex I & Complex II	SOD93726	SOD93749.1	Complex I	PF00037.25	4Fe-4S binding domain	NADH dehydrogenase subunit I [Caenispirillum bisanense]
11	Complex I & Complex II	SOD93726	SOD93751.1	Complex I	PF00499.18	NADH-ubiquinone/plastoquinone oxidoreductase chain 6	NADH dehydrogenase subunit J [Caenispirillum bisanense]
12	Complex I & Complex II	SOD93726	SOD93754.1	Complex I	PF00420.22	NADH-ubiquinone/plastoquinone oxidoreductase chain 4L	NADH dehydrogenase subunit K [Caenispirillum bisanense]
13	Complex I & Complex II	SOD93726	SOD93756.1	Complex I	PF00361.18	Proton-conducting membrane transporter	NADH dehydrogenase subunit L [Caenispirillum bisanense]
14	Complex I & Complex II	SOD93726	SOD93758.1	Complex I	PF00361.18	Proton-conducting membrane transporter	NADH dehydrogenase subunit M [Caenispirillum bisanense]
15	Complex I & Complex II	SOD93726	SOD93760.1	Complex I	PF00361.18	Proton-conducting membrane transporter	NADH dehydrogenase subunit N [Caenispirillum bisanense]
COMPLEX I & COMPLEX II & CYTOCHROMES
-15	Complex I & Complex II & Cytochromes	WP_009540302	WP_009540287.1	Complex I	PF00361.18@Proton_antipo_M@Proton-conducting membrane transporter;		NADH-quinone oxidoreductase subunit NuoN [Caenispirillum salinarum]
-14	Complex I & Complex II & Cytochromes	WP_009540302	WP_009540288.1	Complex I	PF00361.18@Proton_antipo_M@Proton-conducting membrane transporter;PF01059.15@Oxidored_q5_N@NADH-ubiquinone oxidoreductase chain 4, amino terminus;		NADH-quinone oxidoreductase subunit M [Caenispirillum salinarum]
-13	Complex I & Complex II & Cytochromes	WP_009540302	WP_009540289.1	Complex I	PF00361.18@Proton_antipo_M@Proton-conducting membrane transporter;PF00662.18@Proton_antipo_N@NADH-Ubiquinone oxidoreductase (complex I), chain 5 N-terminus;PF06455.9@NADH5_C@NADH dehydrogenase subunit 5 C-terminus;		NADH-quinone oxidoreductase subunit L [Caenispirillum salinarum]
-12	Complex I & Complex II & Cytochromes	WP_009540302	WP_043644643.1	Complex I	PF00420.22@Oxidored_q2@NADH-ubiquinone/plastoquinone oxidoreductase chain 4L;		NADH-quinone oxidoreductase subunit NuoK [Caenispirillum salinarum]
-11	Complex I & Complex II & Cytochromes	WP_009540302	WP_009540291.1	Complex I	PF00499.18@Oxidored_q3@NADH-ubiquinone/plastoquinone oxidoreductase chain 6;		NADH-ubiquinone oxidoreductase chain J [Caenispirillum salinarum]
-10	Complex I & Complex II & Cytochromes	WP_009540302	WP_009540292.1	Complex I	PF00037.25@Fer4@4Fe-4S binding domain;PF12838.5@Fer4_7@4Fe-4S dicluster domain;PF13484.4@Fer4_16@4Fe-4S double cluster binding domain;PF14697.4@Fer4_21@4Fe-4S dicluster domain;PF13187.4@Fer4_9@4Fe-4S dicluster domain;PF13237.4@Fer4_10@4Fe-4S dicluster domain;PF13183.4@Fer4_8@4Fe-4S dicluster domain;PF12797.5@Fer4_2@4Fe-4S binding domain;PF12837.5@Fer4_6@4Fe-4S binding domain;PF12800.5@Fer4_4@4Fe-…		NADH-quinone oxidoreductase subunit NuoI [Caenispirillum salinarum]
-9	Complex I & Complex II & Cytochromes	WP_009540302	WP_009540293.1	Complex I	PF00146.19@NADHdh@NADH dehydrogenase;		NADH-quinone oxidoreductase subunit NuoH [Caenispirillum salinarum]
-8	Complex I & Complex II & Cytochromes	WP_009540302	WP_009540294.1	Complex I	PF00384.20@Molybdopterin@Molybdopterin oxidoreductase;PF13510.4@Fer2_4@2Fe-2S iron-sulfur cluster binding domain;PF10588.7@NADH-G_4Fe-4S_3@NADH-ubiquinone oxidoreductase-G iron-sulfur binding region;PF09326.9@NADH_dhqG_C@NADH-ubiquinone oxidoreductase subunit G, C-terminal;PF00111.25@Fer2@2Fe-2S iron-sulfur cluster binding domain;		NADH-quinone oxidoreductase subunit G [Caenispirillum salinarum]
-7	Complex I & Complex II & Cytochromes	WP_009540302	WP_009540295.1	Complex I	PF01512.15@Complex1_51K@Respiratory-chain NADH dehydrogenase 51 Kd subunit;PF10589.7@NADH_4Fe-4S@NADH-ubiquinone oxidoreductase-F iron-sulfur binding region;PF10531.7@SLBB@SLBB domain;		NADH-quinone oxidoreductase subunit NuoF [Caenispirillum salinarum]
-6	Complex I & Complex II & Cytochromes	WP_009540302	WP_009540296.1	Complex I	PF01257.17@2Fe-2S_thioredx@Thioredoxin-like [2Fe-2S] ferredoxin;		NADH-quinone oxidoreductase subunit NuoE [Caenispirillum salinarum]
-5	Complex I & Complex II & Cytochromes	WP_009540302	WP_009540297.1	Complex I	PF00346.17@Complex1_49kDa@Respiratory-chain NADH dehydrogenase, 49 Kd subunit;		NADH-quinone oxidoreductase subunit NuoD [Caenispirillum salinarum]
-4	Complex I & Complex II & Cytochromes	WP_009540302	WP_009540298.1	Complex I	PF00329.17@Complex1_30kDa@Respiratory-chain NADH dehydrogenase, 30 Kd subunit;		NADH-quinone oxidoreductase subunit C [Caenispirillum salinarum]
-3	Complex I & Complex II & Cytochromes	WP_009540302	WP_043644482.1	Complex I	PF01058.20@Oxidored_q6@NADH ubiquinone oxidoreductase, 20 Kd subunit;		NADH dehydrogenase [Caenispirillum salinarum]
-2	Complex I & Complex II & Cytochromes	WP_009540302	WP_009540300.1	Complex I	PF00507.17@Oxidored_q4@NADH-ubiquinone/plastoquinone oxidoreductase, chain 3;		NADH-quinone oxidoreductase subunit A [Caenispirillum salinarum]
-1	Complex I & Complex II & Cytochromes	WP_009540302	WP_009540301.1	UBI binding protein	PF03364.18@Polyketide_cyc@Polyketide cyclase / dehydrase and lipid transport;PF10604.7@Polyketide_cyc2@Polyketide cyclase / dehydrase and lipid transport;		ubiquinone-binding protein [Caenispirillum salinarum]
0	Complex I & Complex II & Cytochromes	WP_009540302	WP_009540302.1	RQUA	PF13489.4@Methyltransf_23@Methyltransferase domain;PF13649.4@Methyltransf_25@Methyltransferase domain;		methyltransferase [Caenispirillum salinarum]
1	Complex I & Complex II & Cytochromes	WP_009540302	WP_009540304.1	Cytochrome c	PF11783.6@Cytochrome_cB@Cytochrome c bacterial;PF14522.4@Cytochrome_C7@Cytochrome c7 and related cytochrome c;		Octaheme tetrathionate reductase [Caenispirillum salinarum]
2	Complex I & Complex II & Cytochromes	WP_009540302	WP_009540305.1	Cytochrome b561	PF01292.18@Ni_hydr_CYTB@Prokaryotic cytochrome b561;		cytochrome b561 [Caenispirillum salinarum]
3	Complex I & Complex II & Cytochromes	WP_009540302	WP_009540306.1	SDHA/FRDA	PF00890.22@FAD_binding_2@FAD binding domain;PF02910.18@Succ_DH_flav_C@Fumarate reductase flavoprotein C-term;PF01946.15@Thi4@Thi4 family;		fumarate reductase (quinol) flavoprotein subunit [Caenispirillum salinarum]
4	Complex I & Complex II & Cytochromes	WP_009540302	WP_009540307.1	SDHB/FRDB	PF13085.4@Fer2_3@2Fe-2S iron-sulfur cluster binding domain;PF13183.4@Fer4_8@4Fe-4S dicluster domain;PF13237.4@Fer4_10@4Fe-4S dicluster domain;PF13534.4@Fer4_17@4Fe-4S dicluster domain;PF13187.4@Fer4_9@4Fe-4S dicluster domain;PF12838.5@Fer4_7@4Fe-4S dicluster domain;PF13484.4@Fer4_16@4Fe-4S double cluster binding domain;		succinate dehydrogenase/fumarate reductase iron-sulfur subunit [Caenispirillum salinarum]
5	Complex I & Complex II & Cytochromes	WP_009540302	WP_009540308.1	SDHC/FRDC	PF02300.15@Fumarate_red_C@Fumarate reductase subunit C;		fumarate reductase subunit C [Caenispirillum salinarum]
6	Complex I & Complex II & Cytochromes	WP_009540302	WP_043644648.1	SDHD/FRDD	PF02313.15@Fumarate_red_D@Fumarate reductase subunit D;		fumarate reductase subunit D [Caenispirillum salinarum]
7	Complex I & Complex II & Cytochromes	WP_009540302	WP_009540310.1		No Hit;		hypothetical protein [Caenispirillum salinarum]
8	Complex I & Complex II & Cytochromes	WP_009540302	WP_009540311.1	Nitrate reductase	PF02613.13@Nitrate_red_del@Nitrate reductase delta subunit;		hypothetical protein [Caenispirillum salinarum]
9	Complex I & Complex II & Cytochromes	WP_009540302	WP_009540312.1		PF00216.19@Bac_DNA_binding@Bacterial DNA-binding protein;		HU family DNA-binding protein [Caenispirillum salinarum]
10	Complex I & Complex II & Cytochromes	WP_009540302	WP_009540313.1		PF05362.11@Lon_C@Lon protease (S16) C-terminal proteolytic domain;PF02190.14@LON_substr_bdg@ATP-dependent protease La (LON) substrate-binding domain;PF00004.27@AAA@ATPase family associated with various cellular activities (AAA);PF07728.12@AAA_5@AAA domain (dynein-related subfamily);PF13541.4@ChlI@Subunit ChlI of Mg-chelatase;PF08298.9@AAA_PrkA@PrkA AAA domain;		endopeptidase La [Caenispirillum salinarum]
11	Complex I & Complex II & Cytochromes	WP_009540302	WP_009540315.1		PF07724.12@AAA_2@AAA domain (Cdc48 subfamily);PF06689.11@zf-C4_ClpX@ClpX C4-type zinc finger;PF00004.27@AAA@ATPase family associated with various cellular activities (AAA);PF10431.7@ClpB_D2-small@C-terminal, D2-small domain, of ClpB protein;PF01078.19@Mg_chelatase@Magnesium chelatase, subunit ChlI;PF07728.12@AAA_5@AAA domain (dynein-related subfamily);		ATP-dependent Clp protease ATP-binding subunit ClpX [Caenispirillum salinarum]
12	Complex I & Complex II & Cytochromes	WP_009540302	WP_043644485.1		PF00574.21@CLP_protease@Clp protease;		ATP-dependent Clp protease proteolytic subunit [Caenispirillum salinarum]
13	Complex I & Complex II & Cytochromes	WP_009540302	WP_009540317.1		PF05698.12@Trigger_C@Bacterial trigger factor protein (TF) C-terminus;PF05697.11@Trigger_N@Bacterial trigger factor protein (TF);PF00254.26@FKBP_C@FKBP-type peptidyl-prolyl cis-trans isomerase;		trigger factor [Caenispirillum salinarum]
14	Complex I & Complex II & Cytochromes	WP_009540302	WP_009540318.1		PF11563.6@Protoglobin@Protoglobin;PF00015.19@MCPsignal@Methyl-accepting chemotaxis protein (MCP) signalling domain;PF06008.12@Laminin_I@Laminin Domain I;		methyl-accepting chemotaxis protein [Caenispirillum salinarum]
15	Complex I & Complex II & Cytochromes	WP_009540302	WP_009540319.1		PF00037.25@Fer4@4Fe-4S binding domain;PF13237.4@Fer4_10@4Fe-4S dicluster domain;PF12797.5@Fer4_2@4Fe-4S binding domain;PF12838.5@Fer4_7@4Fe-4S dicluster domain;		4Fe-4S ferredoxin [Caenispirillum salinarum]
COMPLEX I & COMPLEX III
-15	Complex I & Complex III	WP_081824947	WP_035839725.1		No Hit;		MULTISPECIES: hypothetical protein [Defluviimonas]
-14	Complex I & Complex III	WP_081824947	WP_035839727.1		PF04140.12@ICMT@Isoprenylcysteine carboxyl methyltransferase (ICMT) family;PF04191.11@PEMT@Phospholipid methyltransferase;		MULTISPECIES: isoprenylcysteine carboxylmethyltransferase family protein [Defluviimonas]
-13	Complex I & Complex III	WP_081824947	WP_035839729.1		PF11666.6@DUF2933@Protein of unknown function (DUF2933);		MULTISPECIES: DUF2933 domain-containing protein [Defluviimonas]
-12	Complex I & Complex III	WP_081824947	WP_035839731.1		PF00571.26@CBS@CBS domain;PF04972.15@BON@BON domain;		MULTISPECIES: cystathionine beta-lyase [Defluviimonas]
-11	Complex I & Complex III	WP_081824947	WP_051645901.1	Complex III	PF10399.7@UCR_Fe-S_N@Ubiquitinol-cytochrome C reductase Fe-S subunit TAT signal;PF00355.24@Rieske@Rieske [2Fe-2S] domain;		MULTISPECIES: ubiquinol-cytochrome c reductase iron-sulfur subunit [Defluviimonas]
-10	Complex I & Complex III	WP_081824947	WP_081824948.1		PF13561.4@adh_short_C2@Enoyl-(Acyl carrier protein) reductase;PF00106.23@adh_short@short chain dehydrogenase;		MULTISPECIES: enoyl-[acyl-carrier-protein] reductase FabI [Defluviimonas]
-9	Complex I & Complex III	WP_081824947	WP_081824949.1		PF01515.17@PTA_PTB@Phosphate acetyl/butaryl transferase;		MULTISPECIES: phosphate acetyl/butaryl transferase [Defluviimonas]
-8	Complex I & Complex III	WP_081824947	WP_035839755.1		PF00871.15@Acetate_kinase@Acetokinase family;		MULTISPECIES: acetate/propionate family kinase [Defluviimonas]
-7	Complex I & Complex III	WP_081824947	WP_081824944.1		No Hit;		MULTISPECIES: hypothetical protein [Defluviimonas]
-6	Complex I & Complex III	WP_081824947	WP_081824945.1		PF11339.6@DUF3141@Protein of unknown function (DUF3141);		MULTISPECIES: DUF3141 domain-containing protein [Defluviimonas]
-5	Complex I & Complex III	WP_081824947	WP_035839733.1		No Hit;		MULTISPECIES: hypothetical protein [Defluviimonas]
-4	Complex I & Complex III	WP_081824947	WP_051645903.1		PF00892.18@EamA@EamA-like transporter family;		MULTISPECIES: EamA/RhaT family transporter [Defluviimonas]
-3	Complex I & Complex III	WP_081824947	WP_081824946.1		PF02353.18@CMAS@Mycolic acid cyclopropane synthetase;PF13649.4@Methyltransf_25@Methyltransferase domain;PF13489.4@Methyltransf_23@Methyltransferase domain;PF08241.10@Methyltransf_11@Methyltransferase domain;PF13847.4@Methyltransf_31@Methyltransferase domain;		MULTISPECIES: class I SAM-dependent methyltransferase [Defluviimonas]
-2	Complex I & Complex III	WP_081824947	WP_035839735.1		PF03486.12@HI0933_like@HI0933-like protein;PF13450.4@NAD_binding_8@NAD(P)-binding Rossmann-like domain;		MULTISPECIES: hypothetical protein [Defluviimonas]
-1	Complex I & Complex III	WP_081824947	WP_035839737.1		PF13202.4@EF-hand_5@EF hand;PF13405.4@EF-hand_6@EF-hand domain;PF13499.4@EF-hand_7@EF-hand domain pair;PF00036.30@EF-hand_1@EF hand;		MULTISPECIES: hypothetical protein [Defluviimonas]
0	Complex I & Complex III	WP_081824947	WP_081824947.1	RQUA	PF13489.4@Methyltransf_23@Methyltransferase domain;PF13649.4@Methyltransf_25@Methyltransferase domain;		MULTISPECIES: class I SAM-dependent methyltransferase [Defluviimonas]
1	Complex I & Complex III	WP_081824947	WP_051645905.1		No Hit;		MULTISPECIES: hypothetical protein [Defluviimonas]
2	Complex I & Complex III	WP_081824947	WP_092164207.1		PF09459.8@EB_dh@Ethylbenzene dehydrogenase;		hypothetical protein [Defluviimonas indica]
3	Complex I & Complex III	WP_081824947	WP_092164208.1		PF07732.13@Cu-oxidase_3@Multicopper oxidase;PF07731.12@Cu-oxidase_2@Multicopper oxidase;		nitrite reductase, copper-containing [Defluviimonas indica]
4	Complex I & Complex III	WP_081824947	WP_081825022.1		PF00982.19@Glyco_transf_20@Glycosyltransferase family 20;		MULTISPECIES: hypothetical protein [Defluviimonas]
5	Complex I & Complex III	WP_081824947	WP_035841525.1	Complex I	PF00507.17@Oxidored_q4@NADH-ubiquinone/plastoquinone oxidoreductase, chain 3;		MULTISPECIES: NADH-quinone oxidoreductase subunit I [Defluviimonas]
6	Complex I & Complex III	WP_081824947	WP_092164217.1	Complex I	PF00346.17@Complex1_49kDa@Respiratory-chain NADH dehydrogenase, 49 Kd subunit;		hypothetical protein [Defluviimonas indica]
7	Complex I & Complex III	WP_081824947	WP_035841253.1	Complex I	PF00146.19@NADHdh@NADH dehydrogenase;		MULTISPECIES: NADH dehydrogenase [Defluviimonas]
8	Complex I & Complex III	WP_081824947	WP_035841255.1	Complex I	PF00499.18@Oxidored_q3@NADH-ubiquinone/plastoquinone oxidoreductase chain 6;		MULTISPECIES: NADH-ubiquinone oxidoreductase subunit 6 [Defluviimonas]
9	Complex I & Complex III	WP_081824947	WP_035841257.1	Complex I	PF00420.22@Oxidored_q2@NADH-ubiquinone/plastoquinone oxidoreductase chain 4L;		MULTISPECIES: NADH-quinone oxidoreductase subunit NuoK [Defluviimonas]
10	Complex I & Complex III	WP_081824947	WP_035841260.1	Complex I	PF00361.18@Proton_antipo_M@Proton-conducting membrane transporter;PF00662.18@Proton_antipo_N@NADH-Ubiquinone oxidoreductase (complex I), chain 5 N-terminus;		MULTISPECIES: NADH dehydrogenase [Defluviimonas]
11	Complex I & Complex III	WP_081824947	WP_035841262.1	Complex I	PF00361.18@Proton_antipo_M@Proton-conducting membrane transporter;		MULTISPECIES: oxidoreductase [Defluviimonas]
12	Complex I & Complex III	WP_081824947	WP_035841265.1	Complex I	PF00361.18@Proton_antipo_M@Proton-conducting membrane transporter;		MULTISPECIES: oxidoreductase [Defluviimonas]
COMPLEX I & CYTOCHROME OXIDASE
-15	Complex I & COX	SEL01946	SEL01316.1	Cytochrome c oxidase for fructose dehydrogenase	PF00116.18@COX2@Cytochrome C oxidase subunit II, periplasmic domain;		Cytochrome C oxidase subunit II, substrate-binding [Jannaschia helgolandensis]
-14	Complex I & COX	SEL01946	SEL01360.1	Cytochrome c oxidase for fructose dehydrogenase	PF00115.18@COX1@Cytochrome C and Quinol oxidase polypeptide I;		cytochrome c oxidase subunit 1 [Jannaschia helgolandensis]
-13	Complex I & COX	SEL01946	SEL01401.1		No Hit;		hypothetical protein SAMN04488526_1802, partial [Jannaschia helgolandensis]
-12	Complex I & COX	SEL01946	SEL01449.1		PF07731.12@Cu-oxidase_2@Multicopper oxidase;		Multicopper oxidase [Jannaschia helgolandensis]
-11	Complex I & COX	SEL01946	SEL01490.1		PF07992.12@Pyr_redox_2@Pyridine nucleotide-disulphide oxidoreductase;PF02852.20@Pyr_redox_dim@Pyridine nucleotide-disulphide oxidoreductase, dimerisation domain;PF00070.25@Pyr_redox@Pyridine nucleotide-disulphide oxidoreductase;PF13738.4@Pyr_redox_3@Pyridine nucleotide-disulphide oxidoreductase;PF03486.12@HI0933_like@HI0933-like protein;PF13450.4@NAD_binding_8@NAD(P)-binding Rossmann-like domain;		glutathione reductase (NADPH) [Jannaschia helgolandensis]
-10	Complex I & COX	SEL01946	SEL01525.1		PF07992.12@Pyr_redox_2@Pyridine nucleotide-disulphide oxidoreductase;PF02852.20@Pyr_redox_dim@Pyridine nucleotide-disulphide oxidoreductase, dimerisation domain;PF00070.25@Pyr_redox@Pyridine nucleotide-disulphide oxidoreductase;PF13738.4@Pyr_redox_3@Pyridine nucleotide-disulphide oxidoreductase;PF01134.20@GIDA@Glucose inhibited division protein A;PF03486.12@HI0933_like@HI0933-like protein;		mercuric reductase [Jannaschia helgolandensis]
-9	Complex I & COX	SEL01946	SEL01563.1		PF11431.6@Transport_MerF@Membrane transport protein MerF;		Membrane transport protein MerF [Jannaschia helgolandensis]
-8	Complex I & COX	SEL01946	SEL01612.1		No Hit;		Copper chaperone CopZ [Jannaschia helgolandensis]
-7	Complex I & COX	SEL01946	SEL01653.1		PF02411.13@MerT@MerT mercuric transport protein;		mercuric ion transport protein [Jannaschia helgolandensis]
-6	Complex I & COX	SEL01946	SEL01686.1		PF09278.9@MerR-DNA-bind@MerR, DNA binding;PF13411.4@MerR_1@MerR HTH family regulatory protein;PF00376.21@MerR@MerR family regulatory protein;		MerR family transcriptional regulator, mercuric resistance operon regulatory protein [Jannaschia helgolandensis]
-5	Complex I & COX	SEL01946	SEL01722.1		PF00892.18@EamA@EamA-like transporter family;		Threonine/homoserine efflux transporter RhtA [Jannaschia helgolandensis]
-4	Complex I & COX	SEL01946	SEL01762.1		PF02353.18@CMAS@Mycolic acid cyclopropane synthetase;PF13489.4@Methyltransf_23@Methyltransferase domain;PF13649.4@Methyltransf_25@Methyltransferase domain;PF08241.10@Methyltransf_11@Methyltransferase domain;PF13847.4@Methyltransf_31@Methyltransferase domain;PF08242.10@Methyltransf_12@Methyltransferase domain;		cyclopropane-fatty-acyl-phospholipid synthase [Jannaschia helgolandensis]
-3	Complex I & COX	SEL01946	SEL01807.1		PF12536.6@DUF3734@Patatin phospholipase;PF01734.20@Patatin@Patatin-like phospholipase;		NTE family protein [Jannaschia helgolandensis]
-2	Complex I & COX	SEL01946	SEL01864.1		PF06314.9@ADC@Acetoacetate decarboxylase (ADC);		acetoacetate decarboxylase [Jannaschia helgolandensis]
-1	Complex I & COX	SEL01946	SEL01904.1		No Hit;		hypothetical protein SAMN04488526_1814 [Jannaschia helgolandensis]
0	Complex I & COX	SEL01946	SEL01946.1	RQUA	PF13649.4@Methyltransf_25@Methyltransferase domain;PF13489.4@Methyltransf_23@Methyltransferase domain;PF13847.4@Methyltransf_31@Methyltransferase domain;PF08241.10@Methyltransf_11@Methyltransferase domain;		Methyltransferase domain-containing protein [Jannaschia helgolandensis]
1	Complex I & COX	SEL01946	SEL01984.1		No Hit;		hypothetical protein SAMN04488526_1816 [Jannaschia helgolandensis]
2	Complex I & COX	SEL01946	SEL02016.1		PF09459.8@EB_dh@Ethylbenzene dehydrogenase;		Ethylbenzene dehydrogenase [Jannaschia helgolandensis]
3	Complex I & COX	SEL01946	SEL02065.1		No Hit;		hypothetical protein SAMN04488526_1818 [Jannaschia helgolandensis]
4	Complex I & COX	SEL01946	SEL02104.1		No Hit;		hypothetical protein SAMN04488526_1819 [Jannaschia helgolandensis]
5	Complex I & COX	SEL01946	SEL02163.1		PF04542.12@Sigma70_r2@Sigma-70 region 2;		RNA polymerase sigma-70 factor, ECF subfamily [Jannaschia helgolandensis]
6	Complex I & COX	SEL01946	SEL02184.1		PF01323.18@DSBA@DSBA-like thioredoxin domain;		Predicted dithiol-disulfide isomerase, DsbA family [Jannaschia helgolandensis]
7	Complex I & COX	SEL01946	SEL02222.1		No Hit;		hypothetical protein SAMN04488526_1822 [Jannaschia helgolandensis]
8	Complex I & COX	SEL01946	SEL02243.1	Complex I	PF00507.17@Oxidored_q4@NADH-ubiquinone/plastoquinone oxidoreductase, chain 3;		NADH dehydrogenase subunit A [Jannaschia helgolandensis]
9	Complex I & COX	SEL01946	SEL02287.1		No Hit;		hypothetical protein SAMN04488526_1824, partial [Jannaschia helgolandensis]
10	Complex I & COX	SEL01946	SEL40523.1		PF13737.4@DDE_Tnp_1_5@Transposase DDE domain;		Transposase DDE domain-containing protein [Jannaschia helgolandensis]
11	Complex I & COX	SEL01946	SEL40532.1		PF03781.14@FGE-sulfatase@Sulfatase-modifying factor enzyme 1;		Formylglycine-generating enzyme, required for sulfatase activity, contains SUMF1/FGE domain [Jannaschia helgolandensis]
12	Complex I & COX	SEL01946	SEL40566.1		PF02371.14@Transposase_20@Transposase IS116/IS110/IS902 family;PF01548.15@DEDD_Tnp_IS110@Transposase;		Transposase [Jannaschia helgolandensis]
13	Complex I & COX	SEL01946	SEL40611.1		PF02371.14@Transposase_20@Transposase IS116/IS110/IS902 family;PF01548.15@DEDD_Tnp_IS110@Transposase;		Transposase [Jannaschia helgolandensis]
14	Complex I & COX	SEL01946	SEL40656.1		No Hit;		hypothetical protein SAMN04488526_2575 [Jannaschia helgolandensis]
15	Complex I & COX	SEL01946	SEL40691.1		No Hit;		hypothetical protein SAMN04488526_2576 [Jannaschia helgolandensis]
COMPLEX I & HYDROGENASE MATURATION
-14	Complex I & Hydrogenase maturation	OGS90730	OGS90716.1		PF13549.4@ATP-grasp_5@ATP-grasp domain;PF13607.4@Succ_CoA_lig@Succinyl-CoA ligase like flavodoxin domain;PF13380.4@CoA_binding_2@CoA binding domain;PF13302.5@Acetyltransf_3@Acetyltransferase (GNAT) domain;PF00583.23@Acetyltransf_1@Acetyltransferase (GNAT) family;PF02629.17@CoA_binding@CoA binding domain;PF13420.5@Acetyltransf_4@Acetyltransferase (GNAT) domain;		GNAT family N-acetyltransferase [Gallionellales bacterium GWA2_60_18]
-13	Complex I & Hydrogenase maturation	OGS90730	OGS90717.1		PF00563.18@EAL@EAL domain;PF00990.19@GGDEF@Diguanylate cyclase, GGDEF domain;PF08448.8@PAS_4@PAS fold;PF13426.5@PAS_9@PAS domain;PF00989.23@PAS@PAS fold;PF08447.10@PAS_3@PAS fold;PF13185.4@GAF_2@GAF domain;PF13188.5@PAS_8@PAS domain;PF03924.11@CHASE@CHASE domain;PF12860.5@PAS_7@PAS fold;		hypothetical protein A2Z95_06855 [Gallionellales bacterium GWA2_60_18]
-12	Complex I & Hydrogenase maturation	OGS90730	OGS90718.1		PF00343.18@Phosphorylase@Carbohydrate phosphorylase;		glycogen phosphorylase [Gallionellales bacterium GWA2_60_18]
-11	Complex I & Hydrogenase maturation	OGS90730	OGS90719.1	Hydrogenase maturation protein	PF00378.18@ECH_1@Enoyl-CoA hydratase/isomerase;PF02911.16@Formyl_trans_C@Formyl transferase, C-terminal domain;PF00551.17@Formyl_trans_N@Formyl transferase;		hydrogenase maturation protein [Gallionellales bacterium GWA2_60_18]
-10	Complex I & Hydrogenase maturation	OGS90730	OGS90720.1	Hydrogenase maturation protein	PF02769.20@AIRS_C@AIR synthase related protein, C-terminal domain;PF00586.22@AIRS@AIR synthase related protein, N-terminal domain;		hydrogenase expression/formation protein HypE [Gallionellales bacterium GWA2_60_18]
-9	Complex I & Hydrogenase maturation	OGS90730	OGS90721.1	Hydrogenase maturation protein	PF01924.14@HypD@Hydrogenase formation hypA family;		hydrogenase formation protein HypD [Gallionellales bacterium GWA2_60_18]
-8	Complex I & Hydrogenase maturation	OGS90730	OGS90722.1	Hydrogenase maturation protein	PF01455.16@HupF_HypC@HupF/HypC family;		hydrogenase assembly protein HupF [Gallionellales bacterium GWA2_60_18]
-7	Complex I & Hydrogenase maturation	OGS90730	OGS90723.1	Hydrogenase maturation protein	PF00814.23@Peptidase_M22@Glycoprotease family;		hydrogenase maturation protein HypF [Gallionellales bacterium GWA2_60_18]
-6	Complex I & Hydrogenase maturation	OGS90730	OGS90724.1		PF00085.18@Thioredoxin@Thioredoxin;PF13899.4@Thioredoxin_7@Thioredoxin-like;		thiol reductase thioredoxin [Gallionellales bacterium GWA2_60_18]
-5	Complex I & Hydrogenase maturation	OGS90730	OGS90725.1		PF02492.17@cobW@CobW/HypB/UreG, nucleotide-binding domain;		hydrogenase accessory protein HypB [Gallionellales bacterium GWA2_60_18]
-4	Complex I & Hydrogenase maturation	OGS90730	OGS90726.1		PF04333.11@MlaA@MlaA lipoprotein;		hypothetical protein A2Z95_06900 [Gallionellales bacterium GWA2_60_18]
-3	Complex I & Hydrogenase maturation	OGS90730	OGS90727.1		PF01435.16@Peptidase_M48@Peptidase family M48;		zinc metalloprotease HtpX [Gallionellales bacterium GWA2_60_18]
-2	Complex I & Hydrogenase maturation	OGS90730	OGS90728.1		PF00909.19@Ammonium_transp@Ammonium Transporter Family;		ammonium transporter [Gallionellales bacterium GWA2_60_18]
-1	Complex I & Hydrogenase maturation	OGS90730	OGS90729.1		PF00293.26@NUDIX@NUDIX domain;		NUDIX hydrolase [Gallionellales bacterium GWA2_60_18]
0	Complex I & Hydrogenase maturation	OGS90730	OGS90730.1	RQUA	PF13649.4@Methyltransf_25@Methyltransferase domain;PF01209.16@Ubie_methyltran@ubiE/COQ5 methyltransferase family;PF08241.10@Methyltransf_11@Methyltransferase domain;		methyltransferase [Gallionellales bacterium GWA2_60_18]
1	Complex I & Hydrogenase maturation	OGS90730	OGS90731.1	Complex I	PF00361.18@Proton_antipo_M@Proton-conducting membrane transporter;		NADH-quinone oxidoreductase subunit N [Gallionellales bacterium GWA2_60_18]
2	Complex I & Hydrogenase maturation	OGS90730	OGS90732.1	Complex I	PF00361.18@Proton_antipo_M@Proton-conducting membrane transporter;PF01059.15@Oxidored_q5_N@NADH-ubiquinone oxidoreductase chain 4, amino terminus;		NADH-quinone oxidoreductase subunit M [Gallionellales bacterium GWA2_60_18]
3	Complex I & Hydrogenase maturation	OGS90730	OGS90733.1	Complex I	PF00361.18@Proton_antipo_M@Proton-conducting membrane transporter;PF00662.18@Proton_antipo_N@NADH-Ubiquinone oxidoreductase (complex I), chain 5 N-terminus;		NADH-quinone oxidoreductase subunit L [Gallionellales bacterium GWA2_60_18]
4	Complex I & Hydrogenase maturation	OGS90730	OGS90734.1	Complex I	PF00420.22@Oxidored_q2@NADH-ubiquinone/plastoquinone oxidoreductase chain 4L;		NADH-quinone oxidoreductase subunit K [Gallionellales bacterium GWA2_60_18]
5	Complex I & Hydrogenase maturation	OGS90730	OGS90735.1	Complex I	PF00499.18@Oxidored_q3@NADH-ubiquinone/plastoquinone oxidoreductase chain 6;		NADH:ubiquinone oxidoreductase subunit J [Gallionellales bacterium GWA2_60_18]
6	Complex I & Hydrogenase maturation	OGS90730	OGS90736.1	Complex I	PF00037.25@Fer4@4Fe-4S binding domain;PF12838.5@Fer4_7@4Fe-4S dicluster domain;PF13237.4@Fer4_10@4Fe-4S dicluster domain;PF14697.4@Fer4_21@4Fe-4S dicluster domain;PF13484.4@Fer4_16@4Fe-4S double cluster binding domain;PF13187.4@Fer4_9@4Fe-4S dicluster domain;PF13183.4@Fer4_8@4Fe-4S dicluster domain;PF12837.5@Fer4_6@4Fe-4S binding domain;PF12800.5@Fer4_4@4Fe-4S binding domain;PF12797.5@Fer4_2@4Fe-…		NADH-quinone oxidoreductase subunit I [Gallionellales bacterium GWA2_60_18]
7	Complex I & Hydrogenase maturation	OGS90730	OGS90756.1	Complex I	PF00146.19@NADHdh@NADH dehydrogenase;		NADH-quinone oxidoreductase subunit H [Gallionellales bacterium GWA2_60_18]
8	Complex I & Hydrogenase maturation	OGS90730	OGS90737.1	Complex I	PF00384.20@Molybdopterin@Molybdopterin oxidoreductase;PF13510.4@Fer2_4@2Fe-2S iron-sulfur cluster binding domain;PF10588.7@NADH-G_4Fe-4S_3@NADH-ubiquinone oxidoreductase-G iron-sulfur binding region;PF00111.25@Fer2@2Fe-2S iron-sulfur cluster binding domain;		NADH-quinone oxidoreductase subunit G [Gallionellales bacterium GWA2_60_18]
9	Complex I & Hydrogenase maturation	OGS90730	OGS90738.1	Complex I	PF01512.15@Complex1_51K@Respiratory-chain NADH dehydrogenase 51 Kd subunit;PF10589.7@NADH_4Fe-4S@NADH-ubiquinone oxidoreductase-F iron-sulfur binding region;PF10531.7@SLBB@SLBB domain;		NADH oxidoreductase (quinone) subunit F [Gallionellales bacterium GWA2_60_18]
10	Complex I & Hydrogenase maturation	OGS90730	OGS90739.1	Complex I	PF01257.17@2Fe-2S_thioredx@Thioredoxin-like [2Fe-2S] ferredoxin;		NADH dehydrogenase [Gallionellales bacterium GWA2_60_18]
11	Complex I & Hydrogenase maturation	OGS90730	OGS90740.1	Complex I	PF00346.17@Complex1_49kDa@Respiratory-chain NADH dehydrogenase, 49 Kd subunit;		NADH dehydrogenase [Gallionellales bacterium GWA2_60_18]
12	Complex I & Hydrogenase maturation	OGS90730	OGS90741.1	Complex I	PF00329.17@Complex1_30kDa@Respiratory-chain NADH dehydrogenase, 30 Kd subunit;		NADH-quinone oxidoreductase subunit C [Gallionellales bacterium GWA2_60_18]
13	Complex I & Hydrogenase maturation	OGS90730	OGS90742.1	Complex I	PF01058.20@Oxidored_q6@NADH ubiquinone oxidoreductase, 20 Kd subunit;		NADH dehydrogenase [Gallionellales bacterium GWA2_60_18]
14	Complex I & Hydrogenase maturation	OGS90730	OGS90743.1	Complex I	PF00507.17@Oxidored_q4@NADH-ubiquinone/plastoquinone oxidoreductase, chain 3;		NADH-quinone oxidoreductase subunit A [Gallionellales bacterium GWA2_60_18]
15	Complex I & Hydrogenase maturation	OGS90730	OGS90744.1		PF03840.12@SecG@Preprotein translocase SecG subunit;		preprotein translocase subunit SecG [Gallionellales bacterium GWA2_60_18]
COMPLEX I & UBIQUINONE BIOSYNTHESIS
-15	Complex I & UBI	SDH27902	SDH27416.1		PF01527.18@HTH_Tnp_1@Transposase;PF13518.4@HTH_28@Helix-turn-helix domain;		putative transposase [Roseospirillum parvum]
-14	Complex I & UBI	SDH27902	SDH27450.1		No Hit;		hypothetical protein SAMN05421742_105189 [Roseospirillum parvum]
-13	Complex I & UBI	SDH27902	SDH27481.1		PF12728.5@HTH_17@Helix-turn-helix domain;		Helix-turn-helix domain-containing protein [Roseospirillum parvum]
-12	Complex I & UBI	SDH27902	SDH27513.1		PF14384.4@BrnA_antitoxin@BrnA antitoxin of type II toxin-antitoxin system;		BrnA antitoxin of type II toxin-antitoxin system [Roseospirillum parvum]
-11	Complex I & UBI	SDH27902	SDH27546.1		PF04365.11@BrnT_toxin@Ribonuclease toxin, BrnT, of type II toxin-antitoxin system;		hypothetical protein SAMN05421742_105192 [Roseospirillum parvum]
-10	Complex I & UBI	SDH27902	SDH27582.1		No Hit;		hypothetical protein SAMN05421742_105193 [Roseospirillum parvum]
-9	Complex I & UBI	SDH27902	SDH27620.1		No Hit;		hypothetical protein SAMN05421742_105196 [Roseospirillum parvum]
-8	Complex I & UBI	SDH27902	SDH27655.1		PF05698.12@Trigger_C@Bacterial trigger factor protein (TF) C-terminus;PF05697.11@Trigger_N@Bacterial trigger factor protein (TF);PF00254.26@FKBP_C@FKBP-type peptidyl-prolyl cis-trans isomerase;		trigger factor [Roseospirillum parvum]
-7	Complex I & UBI	SDH27902	SDH27674.1		PF00574.21@CLP_protease@Clp protease;		ATP-dependent Clp protease, protease subunit [Roseospirillum parvum]
-6	Complex I & UBI	SDH27902	SDH27710.1		PF09834.7@DUF2061@Predicted membrane protein (DUF2061);		Uncharacterized membrane protein [Roseospirillum parvum]
-5	Complex I & UBI	SDH27902	SDH27741.1		PF07724.12@AAA_2@AAA domain (Cdc48 subfamily);PF06689.11@zf-C4_ClpX@ClpX C4-type zinc finger;PF00004.27@AAA@ATPase family associated with various cellular activities (AAA);PF10431.7@ClpB_D2-small@C-terminal, D2-small domain, of ClpB protein;PF01078.19@Mg_chelatase@Magnesium chelatase, subunit ChlI;PF07728.12@AAA_5@AAA domain (dynein-related subfamily);PF05496.10@RuvB_N@Holliday junction DNA helic…		ATP-dependent Clp protease ATP-binding subunit ClpX [Roseospirillum parvum]
-4	Complex I & UBI	SDH27902	SDH27779.1		PF05362.11@Lon_C@Lon protease (S16) C-terminal proteolytic domain;PF02190.14@LON_substr_bdg@ATP-dependent protease La (LON) substrate-binding domain;PF00004.27@AAA@ATPase family associated with various cellular activities (AAA);PF07728.12@AAA_5@AAA domain (dynein-related subfamily);PF13541.4@ChlI@Subunit ChlI of Mg-chelatase;		ATP-dependent Lon protease [Roseospirillum parvum]
-3	Complex I & UBI	SDH27902	SDH27808.1		PF00216.19@Bac_DNA_binding@Bacterial DNA-binding protein;PF14908.4@DUF4496@Domain of unknown function (DUF4496);		DNA-binding protein HU-beta [Roseospirillum parvum]
-2	Complex I & UBI	SDH27902	SDH27846.1		No Hit;		hypothetical protein SAMN05421742_105204 [Roseospirillum parvum]
-1	Complex I & UBI	SDH27902	SDH27875.1	COQ10	PF03364.18@Polyketide_cyc@Polyketide cyclase / dehydrase and lipid transport;PF10604.7@Polyketide_cyc2@Polyketide cyclase / dehydrase and lipid transport;		coenzyme Q-binding protein COQ10 [Roseospirillum parvum]
0	Complex I & UBI	SDH27902	SDH27902.1	RQUA	PF13649.4@Methyltransf_25@Methyltransferase domain;PF13489.4@Methyltransf_23@Methyltransferase domain;PF01209.16@Ubie_methyltran@ubiE/COQ5 methyltransferase family;		Methyltransferase domain-containing protein [Roseospirillum parvum]
1	Complex I & UBI	SDH27902	SDH27933.1	Complex I	PF00507.17@Oxidored_q4@NADH-ubiquinone/plastoquinone oxidoreductase, chain 3;		NADH-quinone oxidoreductase subunit A [Roseospirillum parvum]
2	Complex I & UBI	SDH27902	SDH27960.1	Complex I	PF01058.20@Oxidored_q6@NADH ubiquinone oxidoreductase, 20 Kd subunit;		NADH-quinone oxidoreductase subunit B [Roseospirillum parvum]
3	Complex I & UBI	SDH27902	SDH27983.1	Complex I	PF00329.17@Complex1_30kDa@Respiratory-chain NADH dehydrogenase, 30 Kd subunit;		NADH-quinone oxidoreductase subunit C [Roseospirillum parvum]
4	Complex I & UBI	SDH27902	SDH28015.1	Complex I	PF00346.17@Complex1_49kDa@Respiratory-chain NADH dehydrogenase, 49 Kd subunit;		NADH-quinone oxidoreductase subunit D [Roseospirillum parvum]
5	Complex I & UBI	SDH27902	SDH28040.1	Complex I	PF01257.17@2Fe-2S_thioredx@Thioredoxin-like [2Fe-2S] ferredoxin;		NADH-quinone oxidoreductase subunit E [Roseospirillum parvum]
6	Complex I & UBI	SDH27902	SDH28066.1	Complex I	PF01512.15@Complex1_51K@Respiratory-chain NADH dehydrogenase 51 Kd subunit;PF10589.7@NADH_4Fe-4S@NADH-ubiquinone oxidoreductase-F iron-sulfur binding region;PF10531.7@SLBB@SLBB domain;		NADH-quinone oxidoreductase subunit F [Roseospirillum parvum]
7	Complex I & UBI	SDH27902	SDH28098.1	Complex I	PF00384.20@Molybdopterin@Molybdopterin oxidoreductase;PF10588.7@NADH-G_4Fe-4S_3@NADH-ubiquinone oxidoreductase-G iron-sulfur binding region;PF13510.4@Fer2_4@2Fe-2S iron-sulfur cluster binding domain;PF09326.9@NADH_dhqG_C@NADH-ubiquinone oxidoreductase subunit G, C-terminal;PF00111.25@Fer2@2Fe-2S iron-sulfur cluster binding domain;		NADH-quinone oxidoreductase subunit G [Roseospirillum parvum]
8	Complex I & UBI	SDH27902	SDH28122.1	Complex I	PF00146.19@NADHdh@NADH dehydrogenase;		NADH-quinone oxidoreductase subunit H [Roseospirillum parvum]
9	Complex I & UBI	SDH27902	SDH28147.1	Complex I	PF00037.25@Fer4@4Fe-4S binding domain;PF12838.5@Fer4_7@4Fe-4S dicluster domain;PF13484.4@Fer4_16@4Fe-4S double cluster binding domain;PF14697.4@Fer4_21@4Fe-4S dicluster domain;PF13237.4@Fer4_10@4Fe-4S dicluster domain;PF13183.4@Fer4_8@4Fe-4S dicluster domain;PF13187.4@Fer4_9@4Fe-4S dicluster domain;PF12797.5@Fer4_2@4Fe-4S binding domain;PF12837.5@Fer4_6@4Fe-4S binding domain;PF12800.5@Fer4_4@4Fe-…		NADH-quinone oxidoreductase subunit I [Roseospirillum parvum]
10	Complex I & UBI	SDH27902	SDH28174.1	Complex I	PF00499.18@Oxidored_q3@NADH-ubiquinone/plastoquinone oxidoreductase chain 6;		NADH-quinone oxidoreductase subunit J [Roseospirillum parvum]
11	Complex I & UBI	SDH27902	SDH28201.1	Complex I	PF00420.22@Oxidored_q2@NADH-ubiquinone/plastoquinone oxidoreductase chain 4L;		NADH-quinone oxidoreductase subunit K [Roseospirillum parvum]
12	Complex I & UBI	SDH27902	SDH28224.1	Complex I	PF00361.18@Proton_antipo_M@Proton-conducting membrane transporter;PF00662.18@Proton_antipo_N@NADH-Ubiquinone oxidoreductase (complex I), chain 5 N-terminus;PF06455.9@NADH5_C@NADH dehydrogenase subunit 5 C-terminus;PF01010.17@Proton_antipo_C@NADH-dehyrogenase subunit F, TMs, (complex I) C-terminus;		NADH-quinone oxidoreductase subunit L [Roseospirillum parvum]
13	Complex I & UBI	SDH27902	SDH28252.1	Complex I	PF00361.18@Proton_antipo_M@Proton-conducting membrane transporter;PF01059.15@Oxidored_q5_N@NADH-ubiquinone oxidoreductase chain 4, amino terminus;		NADH-quinone oxidoreductase subunit M [Roseospirillum parvum]
14	Complex I & UBI	SDH27902	SDH28277.1	Complex I	PF00361.18@Proton_antipo_M@Proton-conducting membrane transporter;		NADH-quinone oxidoreductase subunit N [Roseospirillum parvum]
15	Complex I & UBI	SDH27902	SDH28301.1		PF03099.17@BPL_LplA_LipB@Biotin/lipoate A/B protein ligase family;PF16917.3@BPL_LplA_LipB_2@Biotin/lipoate A/B protein ligase family;PF02237.15@BPL_C@Biotin protein ligase C terminal domain;		BirA family transcriptional regulator, biotin operon repressor / biotin-[acetyl-CoA-carboxylase] ligase [Roseospirillum parvum]
COMPLEX II
-15	Complex II	CDH44281	CDH44266.1		PF01098.17@FTSW_RODA_SPOVE@Cell cycle protein;		essential cell division gene, stablilzes FtsZ ring, required for PBP2 expression [Candidatus Contendobacter odensis Run_B_J11]
-14	Complex II	CDH44281	CDH44267.1		PF08245.10@Mur_ligase_M@Mur ligase middle domain;		UDP-N-acetylmuramoylalanine-D-glutamate ligase [Candidatus Contendobacter odensis Run_B_J11]
-13	Complex II	CDH44281	CDH44268.1		PF00953.19@Glycos_transf_4@Glycosyl transferase family 4;		phospho-N-acetylmuramoyl-pentapeptide transferase [Candidatus Contendobacter odensis Run_B_J11]
-12	Complex II	CDH44281	CDH44269.1		PF08245.10@Mur_ligase_M@Mur ligase middle domain;PF02875.19@Mur_ligase_C@Mur ligase family, glutamate ligase domain;PF01225.23@Mur_ligase@Mur ligase family, catalytic domain;		D-alanine:D-alanine-adding enzyme [Candidatus Contendobacter odensis Run_B_J11]
-11	Complex II	CDH44281	CDH44270.1		PF08245.10@Mur_ligase_M@Mur ligase middle domain;PF02875.19@Mur_ligase_C@Mur ligase family, glutamate ligase domain;PF01225.23@Mur_ligase@Mur ligase family, catalytic domain;		UDP-N-acetylmuramoylalanyl-D-glutamate 2,6-diaminopimelate ligase [Candidatus Contendobacter odensis Run_B_J11]
-10	Complex II	CDH44281	CDH44271.1		PF00905.20@Transpeptidase@Penicillin binding protein transpeptidase domain;PF03717.13@PBP_dimer@Penicillin-binding Protein dimerisation domain;		division-specific transpeptidase, penicillin-binding protein 3 [Candidatus Contendobacter odensis Run_B_J11]
-9	Complex II	CDH44281	CDH44272.1		PF04999.11@FtsL@Cell division protein FtsL;		putative Cell division protein FtsL [Candidatus Contendobacter odensis Run_B_J11]
-8	Complex II	CDH44281	CDH44273.1		PF01795.17@Methyltransf_5@MraW methylase family;		S-adenosyl-dependent methyl transferase [Candidatus Contendobacter odensis Run_B_J11]
-7	Complex II	CDH44281	CDH44274.1		PF02381.16@MraZ@MraZ protein, putative antitoxin-like;		conserved hypothetical protein [Candidatus Contendobacter odensis Run_B_J11]
-6	Complex II	CDH44281	CDH44275.1		No Hit;		hypothetical protein BN874_160031 [Candidatus Contendobacter odensis Run_B_J11]
-5	Complex II	CDH44281	CDH44276.1		PF01027.18@Bax1-I@Inhibitor of apoptosis-promoting Bax1;		conserved membrane hypothetical protein [Candidatus Contendobacter odensis Run_B_J11]
-4	Complex II	CDH44281	CDH44277.1	SDHA/FRDA	PF00890.22@FAD_binding_2@FAD binding domain;PF02910.18@Succ_DH_flav_C@Fumarate reductase flavoprotein C-term;PF07992.12@Pyr_redox_2@Pyridine nucleotide-disulphide oxidoreductase;PF01946.15@Thi4@Thi4 family;		Succinate dehydrogenase/fumarate reductase, flavoprotein subunit [Candidatus Contendobacter odensis Run_B_J11]
-3	Complex II	CDH44281	CDH44278.1	SDHB/FRDB	PF13085.4@Fer2_3@2Fe-2S iron-sulfur cluster binding domain;PF13183.4@Fer4_8@4Fe-4S dicluster domain;PF13237.4@Fer4_10@4Fe-4S dicluster domain;PF12838.5@Fer4_7@4Fe-4S dicluster domain;PF13187.4@Fer4_9@4Fe-4S dicluster domain;PF13534.4@Fer4_17@4Fe-4S dicluster domain;PF13484.4@Fer4_16@4Fe-4S double cluster binding domain;		Succinate dehydrogenase/fumarate reductase, anaerobic, Fe-S subunit [Candidatus Contendobacter odensis Run_B_J11]
-2	Complex II	CDH44281	CDH44279.1	SDHC/FRDC	PF02300.15@Fumarate_red_C@Fumarate reductase subunit C;		putative succinate dehydrogenase/fumarate reductase subunit C [Candidatus Contendobacter odensis Run_B_J11]
-1	Complex II	CDH44281	CDH44280.1	SDHD/FRDD	PF02313.15@Fumarate_red_D@Fumarate reductase subunit D;		putative Fumarate reductase subunit D [Candidatus Contendobacter odensis Run_B_J11]
0	Complex II	CDH44281	CDH44281.1	RQUA	PF13649.4@Methyltransf_25@Methyltransferase domain;PF01209.16@Ubie_methyltran@ubiE/COQ5 methyltransferase family;PF08241.10@Methyltransf_11@Methyltransferase domain;		conserved hypothetical protein [Candidatus Contendobacter odensis Run_B_J11]
1	Complex II	CDH44281	CDH44282.1		No Hit;		hypothetical protein BN874_160038 [Candidatus Contendobacter odensis Run_B_J11]
2	Complex II	CDH44281	CDH44283.1		PF01609.19@DDE_Tnp_1@Transposase DDE domain;		transposase [Candidatus Contendobacter odensis Run_B_J11]
3	Complex II	CDH44281	CDH44284.1		No Hit;		hypothetical protein BN874_160040 [Candidatus Contendobacter odensis Run_B_J11]
4	Complex II	CDH44281	CDH44285.1		No Hit;		hypothetical protein BN874_160041 [Candidatus Contendobacter odensis Run_B_J11]
5	Complex II	CDH44281	CDH44286.1		PF07072.9@DUF1342@Protein of unknown function (DUF1342);		conserved hypothetical protein [Candidatus Contendobacter odensis Run_B_J11]
6	Complex II	CDH44281	CDH44287.1		PF01121.18@CoaE@Dephospho-CoA kinase;		dephospho-CoA kinase [Candidatus Contendobacter odensis Run_B_J11]
7	Complex II	CDH44281	CDH44288.1		PF06750.11@DiS_P_DiS@Bacterial Peptidase A24 N-terminal domain;PF01478.16@Peptidase_A24@Type IV leader peptidase family;		type 4 prepilin-like proteins leader peptide processing enzyme (Protein secretion protein XCPA)(Includes: Leader peptidase (Prepilin peptidase); N-methyltransferase) [Candidatus Contendobacter odensis Run_B_J11]
8	Complex II	CDH44281	CDH44289.1		PF00482.21@T2SSF@Type II secretion system (T2SS), protein F;		type 4 fimbrial assembly protein [Candidatus Contendobacter odensis Run_B_J11]
9	Complex II	CDH44281	CDH44290.1		PF00437.18@T2SSE@Type II/IV secretion system protein;PF05157.13@T2SSE_N@Type II secretion system (T2SS), protein E, N-terminal domain;		putative integral membrane protein involved in biogenesis of fimbriae (type IV pilin), protein transport, DNA uptake with P-loop containing NTP hydrolysis domain [Candidatus Contendobacter odensis Run_B_J11]
10	Complex II	CDH44281	CDH44291.1		PF05787.11@DUF839@Bacterial protein of unknown function (DUF839);		conserved exported hypothetical protein [Candidatus Contendobacter odensis Run_B_J11]
11	Complex II	CDH44281	CDH44292.1		No Hit;		hypothetical protein BN874_160048 [Candidatus Contendobacter odensis Run_B_J11]
12	Complex II	CDH44281	CDH44293.1		PF01071.17@GARS_A@Phosphoribosylglycinamide synthetase, ATP-grasp (A) domain;PF02844.13@GARS_N@Phosphoribosylglycinamide synthetase, N domain;PF02843.14@GARS_C@Phosphoribosylglycinamide synthetase, C domain;		phosphoribosylglycinamide synthetase (GAR synthetase) [Candidatus Contendobacter odensis Run_B_J11]
13	Complex II	CDH44281	CDH44294.1		No Hit;		conserved hypothetical protein [Candidatus Contendobacter odensis Run_B_J11]
14	Complex II	CDH44281	CDH44295.1		PF13175.4@AAA_15@AAA ATPase domain;PF13304.4@AAA_21@AAA domain, putative AbiEii toxin, Type IV TA system;PF02463.17@SMC_N@RecF/RecN/SMC N terminal domain;PF13476.4@AAA_23@AAA domain;		conserved hypothetical protein [Candidatus Contendobacter odensis Run_B_J11]
15	Complex II	CDH44281	CDH44296.1		PF01808.16@AICARFT_IMPCHas@AICARFT/IMPCHase bienzyme;PF02142.20@MGS@MGS-like domain;		bifunctional: IMP cyclohydrolase (N-terminal); phosphoribosylaminoimidazolecarboxamide formyltransferase (C-terminal) [Candidatus Contendobacter odensis Run_B_J11]
-15	Complex II	EXI86820	EXI86910.1		No Hit;		hypothetical protein AW12_02101 [Candidatus Accumulibacter sp. BA-94]
-14	Complex II	EXI86820	EXI86911.1		PF07992.12@Pyr_redox_2@Pyridine nucleotide-disulphide oxidoreductase;PF00070.25@Pyr_redox@Pyridine nucleotide-disulphide oxidoreductase;PF13738.4@Pyr_redox_3@Pyridine nucleotide-disulphide oxidoreductase;		Glucosaminate ammonia-lyase [Candidatus Accumulibacter sp. BA-94]
-13	Complex II	EXI86820	EXI86912.1		PF00027.27@cNMP_binding@Cyclic nucleotide-binding domain;PF13545.4@HTH_Crp_2@Crp-like helix-turn-helix domain;PF00325.18@Crp@Bacterial regulatory proteins, crp family;		Cyclic AMP receptor-like protein [Candidatus Accumulibacter sp. BA-94]
-12	Complex II	EXI86820	EXI86878.1		PF14403.4@CP_ATPgrasp_2@Circularly permuted ATP-grasp type 2;PF04174.11@CP_ATPgrasp_1@A circularly permuted ATPgrasp;		hypothetical protein AW12_02104 [Candidatus Accumulibacter sp. BA-94]
-11	Complex II	EXI86820	EXI86879.1		No Hit;		hypothetical protein AW12_02106 [Candidatus Accumulibacter sp. BA-94]
-10	Complex II	EXI86820	EXI86880.1		No Hit;		hypothetical protein AW12_02107 [Candidatus Accumulibacter sp. BA-94]
-9	Complex II	EXI86820	EXI86881.1		No Hit;		hypothetical protein AW12_02108 [Candidatus Accumulibacter sp. BA-94]
-8	Complex II	EXI86820	EXI86812.1		PF02120.14@Flg_hook@Flagellar hook-length control protein FliK;		Flagellar hook-length control protein FliK [Candidatus Accumulibacter sp. BA-94]
-7	Complex II	EXI86820	EXI86813.1		PF01312.17@Bac_export_2@FlhB HrpN YscU SpaS Family;		Flagellar biosynthetic protein FlhB [Candidatus Accumulibacter sp. BA-94]
-6	Complex II	EXI86820	EXI86814.1		PF07317.10@YcgR@Flagellar regulator YcgR;PF07238.12@PilZ@PilZ domain;		Cyclic di-GMP binding protein YcgR [Candidatus Accumulibacter sp. BA-94]
-5	Complex II	EXI86820	EXI86815.1	SDHD/FRDD	PF02313.15@Fumarate_red_D@Fumarate reductase subunit D;		Fumarate reductase 13 kDa hydrophobic protein [Candidatus Accumulibacter sp. BA-94]
-4	Complex II	EXI86820	EXI86816.1	SDHC/FRDC	PF02300.15@Fumarate_red_C@Fumarate reductase subunit C;		Fumarate reductase 15 kDa hydrophobic protein [Candidatus Accumulibacter sp. BA-94]
-3	Complex II	EXI86820	EXI86817.1	SDHB/FRDB	PF13085.4@Fer2_3@2Fe-2S iron-sulfur cluster binding domain;PF13183.4@Fer4_8@4Fe-4S dicluster domain;PF13237.4@Fer4_10@4Fe-4S dicluster domain;PF13534.4@Fer4_17@4Fe-4S dicluster domain;PF13187.4@Fer4_9@4Fe-4S dicluster domain;		Fumarate reductase iron-sulfur subunit [Candidatus Accumulibacter sp. BA-94]
-2	Complex II	EXI86820	EXI86818.1	SDHA/FRDA	PF02910.18@Succ_DH_flav_C@Fumarate reductase flavoprotein C-term;PF00890.22@FAD_binding_2@FAD binding domain;		Fumarate reductase flavoprotein subunit [Candidatus Accumulibacter sp. BA-94]
-1	Complex II	EXI86820	EXI86819.1		No Hit;		hypothetical protein AW12_02116 [Candidatus Accumulibacter sp. BA-94]
0	Complex II	EXI86820	EXI86820.1	RQUA	PF13649.4@Methyltransf_25@Methyltransferase domain;PF01209.16@Ubie_methyltran@ubiE/COQ5 methyltransferase family;PF08241.10@Methyltransf_11@Methyltransferase domain;		Demethylmenaquinone methyltransferase [Candidatus Accumulibacter sp. BA-94]
1	Complex II	EXI86820	EXI86821.1		PF01026.19@TatD_DNase@TatD related DNase;		putative deoxyribonuclease YjjV [Candidatus Accumulibacter sp. BA-94]
2	Complex II	EXI86820	EXI86822.1		PF00378.18@ECH_1@Enoyl-CoA hydratase/isomerase;PF16113.3@ECH_2@Enoyl-CoA hydratase/isomerase;		1,2-epoxyphenylacetyl-CoA isomerase [Candidatus Accumulibacter sp. BA-94]
3	Complex II	EXI86820	EXI86823.1		PF01266.22@DAO@FAD dependent oxidoreductase;PF13450.4@NAD_binding_8@NAD(P)-binding Rossmann-like domain;PF03486.12@HI0933_like@HI0933-like protein;PF07992.12@Pyr_redox_2@Pyridine nucleotide-disulphide oxidoreductase;		D-amino acid dehydrogenase small subunit [Candidatus Accumulibacter sp. BA-94]
4	Complex II	EXI86820	EXI86824.1		PF13328.4@HD_4@HD domain;PF04607.15@RelA_SpoT@Region found in RelA / SpoT proteins;PF02824.19@TGS@TGS domain;PF13291.4@ACT_4@ACT domain;		Bifunctional (p)ppGpp synthase/hydrolase SpoT [Candidatus Accumulibacter sp. BA-94]
5	Complex II	EXI86820	EXI86735.1		PF00664.21@ABC_membrane@ABC transporter transmembrane region;PF00005.25@ABC_tran@ABC transporter;		putative ABC transporter ATP-binding protein [Candidatus Accumulibacter sp. BA-94]
6	Complex II	EXI86820	EXI86736.1		PF08909.9@DUF1854@Domain of unknown function (DUF1854);		hypothetical protein AW12_02123 [Candidatus Accumulibacter sp. BA-94]
7	Complex II	EXI86820	EXI86737.1		PF08443.9@RimK@RimK-like ATP-grasp domain;PF13549.4@ATP-grasp_5@ATP-grasp domain;PF02786.15@CPSase_L_D2@Carbamoyl-phosphate synthase L chain, ATP binding domain;		Cyanophycin synthetase [Candidatus Accumulibacter sp. BA-94]
8	Complex II	EXI86820	EXI86738.1		No Hit;		Cyanophycin synthetase [Candidatus Accumulibacter sp. BA-94]
9	Complex II	EXI86820	EXI86739.1		PF08245.10@Mur_ligase_M@Mur ligase middle domain;PF08443.9@RimK@RimK-like ATP-grasp domain;PF02786.15@CPSase_L_D2@Carbamoyl-phosphate synthase L chain, ATP binding domain;		Cyanophycin synthetase [Candidatus Accumulibacter sp. BA-94]
10	Complex II	EXI86820	EXI86740.1		PF02875.19@Mur_ligase_C@Mur ligase family, glutamate ligase domain;		Cyanophycin synthetase [Candidatus Accumulibacter sp. BA-94]
11	Complex II	EXI86820	EXI86741.1		PF03961.11@DUF342@Protein of unknown function (DUF342);		hypothetical protein AW12_02128 [Candidatus Accumulibacter sp. BA-94]
12	Complex II	EXI86820	EXI86742.1		No Hit;		hypothetical protein AW12_02129 [Candidatus Accumulibacter sp. BA-94]
13	Complex II	EXI86820	EXI86743.1		PF13436.4@Gly-zipper_OmpA@Glycine-zipper domain;		hypothetical protein AW12_02130 [Candidatus Accumulibacter sp. BA-94]
14	Complex II	EXI86820	EXI86571.1		No Hit;		hypothetical protein AW12_02131 [Candidatus Accumulibacter sp. BA-94]
15	Complex II	EXI86820	EXI86572.1		PF00571.26@CBS@CBS domain;		putative transcriptional regulator containing CBS domains [Candidatus Accumulibacter sp. BA-94]
-15	Complex II	KFB66839	KFB66824.1		PF01724.14@DUF29@Domain of unknown function DUF29;		hypothetical protein CAPSK01_003763 [Candidatus Accumulibacter sp. SK-01]
-14	Complex II	KFB66839	KFB66825.1		No Hit;		hypothetical protein CAPSK01_003764 [Candidatus Accumulibacter sp. SK-01]
-13	Complex II	KFB66839	KFB66826.1		No Hit;		hypothetical protein CAPSK01_003765 [Candidatus Accumulibacter sp. SK-01]
-12	Complex II	KFB66839	KFB66827.1		PF00664.21@ABC_membrane@ABC transporter transmembrane region;PF00005.25@ABC_tran@ABC transporter;PF03412.13@Peptidase_C39@Peptidase C39 family;		RTX-I toxin determinant B [Candidatus Accumulibacter sp. SK-01]
-11	Complex II	KFB66839	KFB66828.1		PF13437.4@HlyD_3@HlyD family secretion protein;PF16576.3@HlyD_D23@Barrel-sandwich domain of CusB or HlyD membrane-fusion;PF13533.4@Biotin_lipoyl_2@Biotin-lipoyl like;		Hemolysin secretion protein D, chromosomal [Candidatus Accumulibacter sp. SK-01]
-10	Complex II	KFB66839	KFB66829.1		PF00353.17@HemolysinCabind@Haemolysin-type calcium-binding repeat (2 copies);		Poly(beta-D-mannuronate) C5 epimerase 7 [Candidatus Accumulibacter sp. SK-01]
-9	Complex II	KFB66839	KFB66830.1		No Hit;		hypothetical protein CAPSK01_003769 [Candidatus Accumulibacter sp. SK-01]
-8	Complex II	KFB66839	KFB66831.1		No Hit;		hypothetical protein CAPSK01_003770 [Candidatus Accumulibacter sp. SK-01]
-7	Complex II	KFB66839	KFB66832.1		No Hit;		hypothetical protein CAPSK01_003771 [Candidatus Accumulibacter sp. SK-01]
-6	Complex II	KFB66839	KFB66833.1		No Hit;		hypothetical protein CAPSK01_003772 [Candidatus Accumulibacter sp. SK-01]
-5	Complex II	KFB66839	KFB66834.1	SDHD/FRDD	PF02313.15@Fumarate_red_D@Fumarate reductase subunit D;		Fumarate reductase 13 kDa hydrophobic protein [Candidatus Accumulibacter sp. SK-01]
-4	Complex II	KFB66839	KFB66835.1	SDHC/FRDC	PF02300.15@Fumarate_red_C@Fumarate reductase subunit C;		Fumarate reductase 15 kDa hydrophobic protein [Candidatus Accumulibacter sp. SK-01]
-3	Complex II	KFB66839	KFB66836.1	SDHB/FRDB	PF13085.4@Fer2_3@2Fe-2S iron-sulfur cluster binding domain;PF13183.4@Fer4_8@4Fe-4S dicluster domain;PF13237.4@Fer4_10@4Fe-4S dicluster domain;PF13534.4@Fer4_17@4Fe-4S dicluster domain;PF13187.4@Fer4_9@4Fe-4S dicluster domain;		Fumarate reductase iron-sulfur subunit [Candidatus Accumulibacter sp. SK-01]
-2	Complex II	KFB66839	KFB66837.1	SDHA/FRDA	PF00890.22@FAD_binding_2@FAD binding domain;PF02910.18@Succ_DH_flav_C@Fumarate reductase flavoprotein C-term;		Fumarate reductase flavoprotein subunit [Candidatus Accumulibacter sp. SK-01]
-1	Complex II	KFB66839	KFB66838.1		No Hit;		hypothetical protein CAPSK01_003777 [Candidatus Accumulibacter sp. SK-01]
0	Complex II	KFB66839	KFB66839.1	RQUA	PF13649.4@Methyltransf_25@Methyltransferase domain;PF08241.10@Methyltransf_11@Methyltransferase domain;PF01209.16@Ubie_methyltran@ubiE/COQ5 methyltransferase family;		Demethylmenaquinone methyltransferase [Candidatus Accumulibacter sp. SK-01]
1	Complex II	KFB66839	KFB66840.1		PF01026.19@TatD_DNase@TatD related DNase;		putative deoxyribonuclease YjjV [Candidatus Accumulibacter sp. SK-01]
2	Complex II	KFB66839	KFB66841.1		PF01266.22@DAO@FAD dependent oxidoreductase;PF13450.4@NAD_binding_8@NAD(P)-binding Rossmann-like domain;PF02558.14@ApbA@Ketopantoate reductase PanE/ApbA;		D-amino acid dehydrogenase small subunit [Candidatus Accumulibacter sp. SK-01]
3	Complex II	KFB66839	KFB66842.1		PF13328.4@HD_4@HD domain;PF04607.15@RelA_SpoT@Region found in RelA / SpoT proteins;PF02824.19@TGS@TGS domain;PF13291.4@ACT_4@ACT domain;PF01966.20@HD@HD domain;PF01842.23@ACT@ACT domain;		Bifunctional (p)ppGpp synthase/hydrolase SpoT [Candidatus Accumulibacter sp. SK-01]
4	Complex II	KFB66839	KFB66843.1		PF01192.20@RNA_pol_Rpb6@RNA polymerase Rpb6;		DNA-directed RNA polymerase subunit omega [Candidatus Accumulibacter sp. SK-01]
5	Complex II	KFB66839	KFB66844.1		PF00625.19@Guanylate_kin@Guanylate kinase;		Guanylate kinase [Candidatus Accumulibacter sp. SK-01]
6	Complex II	KFB66839	KFB66845.1		No Hit;		hypothetical protein CAPSK01_003784 [Candidatus Accumulibacter sp. SK-01]
7	Complex II	KFB66839	KFB66846.1		PF13441.4@Gly-zipper_YMGG@YMGG-like Gly-zipper;PF13488.4@Gly-zipper_Omp@Glycine zipper;		lipoprotein [Candidatus Accumulibacter sp. SK-01]
8	Complex II	KFB66839	KFB66847.1		No Hit;		hypothetical protein CAPSK01_003786 [Candidatus Accumulibacter sp. SK-01]
9	Complex II	KFB66839	KFB66848.1		PF07729.10@FCD@FCD domain;PF00392.19@GntR@Bacterial regulatory proteins, gntR family;		putative HTH-type transcriptional regulator YdfH [Candidatus Accumulibacter sp. SK-01]
10	Complex II	KFB66839	KFB66849.1		PF13458.4@Peripla_BP_6@Periplasmic binding protein;PF01094.26@ANF_receptor@Receptor family ligand binding region;PF13433.4@Peripla_BP_5@Periplasmic binding protein domain;		Leucine-, isoleucine-, valine-, threonine-, and alanine-binding protein precursor [Candidatus Accumulibacter sp. SK-01]
11	Complex II	KFB66839	KFB66850.1		PF00171.20@Aldedh@Aldehyde dehydrogenase family;PF01619.16@Pro_dh@Proline dehydrogenase;PF14850.4@Pro_dh-DNA_bdg@DNA-binding domain of Proline dehydrogenase;		Bifunctional protein PutA [Candidatus Accumulibacter sp. SK-01]
12	Complex II	KFB66839	KFB66851.1		No Hit;		hypothetical protein CAPSK01_003790 [Candidatus Accumulibacter sp. SK-01]
13	Complex II	KFB66839	KFB66852.1		PF02653.14@BPD_transp_2@Branched-chain amino acid transport system / permease component;		LIV-I protein H [Candidatus Accumulibacter sp. SK-01]
14	Complex II	KFB66839	KFB66853.1		PF02653.14@BPD_transp_2@Branched-chain amino acid transport system / permease component;PF11862.6@DUF3382@Domain of unknown function (DUF3382);		leucine/isoleucine/valine transporter permease subunit [Candidatus Accumulibacter sp. SK-01]
15	Complex II	KFB66839	KFB66854.1		PF00005.25@ABC_tran@ABC transporter;PF12399.6@BCA_ABC_TP_C@Branched-chain amino acid ATP-binding cassette transporter;PF13304.4@AAA_21@AAA domain, putative AbiEii toxin, Type IV TA system;		Lipopolysaccharide export system ATP-binding protein LptB [Candidatus Accumulibacter sp. SK-01]
-14	Complex II	OGA21977	OGA22065.1		PF02775.19@TPP_enzyme_C@Thiamine pyrophosphate enzyme, C-terminal TPP binding domain;		aldehyde dehydrogenase [Betaproteobacteria bacterium RIFCSPLOWO2_02_FULL_67_26]
-13	Complex II	OGA21977	OGA22066.1		PF02776.16@TPP_enzyme_N@Thiamine pyrophosphate enzyme, N-terminal TPP binding domain;		phosphonopyruvate decarboxylase [Betaproteobacteria bacterium RIFCSPLOWO2_02_FULL_67_26]
-12	Complex II	OGA21977	OGA22067.1		PF03401.12@TctC@Tripartite tricarboxylate transporter family receptor;		hypothetical protein A3I02_07885 [Betaproteobacteria bacterium RIFCSPLOWO2_02_FULL_67_26]
-11	Complex II	OGA21977	OGA22068.1		PF01408.20@GFO_IDH_MocA@Oxidoreductase family, NAD-binding Rossmann fold;PF02894.15@GFO_IDH_MocA_C@Oxidoreductase family, C-terminal alpha/beta domain;		hypothetical protein A3I02_07890 [Betaproteobacteria bacterium RIFCSPLOWO2_02_FULL_67_26]
-10	Complex II	OGA21977	OGA22069.1		PF03928.12@Haem_degrading@Haem-degrading;		hypothetical protein A3I02_07895 [Betaproteobacteria bacterium RIFCSPLOWO2_02_FULL_67_26]
-9	Complex II	OGA21977	OGA22070.1		PF00441.22@Acyl-CoA_dh_1@Acyl-CoA dehydrogenase, C-terminal domain;PF02771.14@Acyl-CoA_dh_N@Acyl-CoA dehydrogenase, N-terminal domain;PF02770.17@Acyl-CoA_dh_M@Acyl-CoA dehydrogenase, middle domain;PF08028.9@Acyl-CoA_dh_2@Acyl-CoA dehydrogenase, C-terminal domain;		acyl-CoA dehydrogenase [Betaproteobacteria bacterium RIFCSPLOWO2_02_FULL_67_26]
-8	Complex II	OGA21977	OGA22071.1		PF02515.15@CoA_transf_3@CoA-transferase family III;		hypothetical protein A3I02_07905, partial [Betaproteobacteria bacterium RIFCSPLOWO2_02_FULL_67_26]
-7	Complex II	OGA21977	OGA21988.1		PF00160.19@Pro_isomerase@Cyclophilin type peptidyl-prolyl cis-trans isomerase/CLD;		hypothetical protein A3I02_07060 [Betaproteobacteria bacterium RIFCSPLOWO2_02_FULL_67_26]
-6	Complex II	OGA21977	OGA21972.1		PF00160.19@Pro_isomerase@Cyclophilin type peptidyl-prolyl cis-trans isomerase/CLD;		cyclophilin [Betaproteobacteria bacterium RIFCSPLOWO2_02_FULL_67_26]
-5	Complex II	OGA21977	OGA21973.1		No Hit;		UDP-2,3-diacylglucosamine diphosphatase [Betaproteobacteria bacterium RIFCSPLOWO2_02_FULL_67_26]
-4	Complex II	OGA21977	OGA21989.1	SDHA/FRDA	PF00890.22@FAD_binding_2@FAD binding domain;PF02910.18@Succ_DH_flav_C@Fumarate reductase flavoprotein C-term;PF07992.12@Pyr_redox_2@Pyridine nucleotide-disulphide oxidoreductase;PF01946.15@Thi4@Thi4 family;		fumarate reductase (quinol) flavoprotein subunit [Betaproteobacteria bacterium RIFCSPLOWO2_02_FULL_67_26]
-3	Complex II	OGA21977	OGA21974.1	SDHB/FRDB	PF13085.4@Fer2_3@2Fe-2S iron-sulfur cluster binding domain;PF13183.4@Fer4_8@4Fe-4S dicluster domain;PF13237.4@Fer4_10@4Fe-4S dicluster domain;PF13187.4@Fer4_9@4Fe-4S dicluster domain;PF13534.4@Fer4_17@4Fe-4S dicluster domain;PF12838.5@Fer4_7@4Fe-4S dicluster domain;		fumarate reductase [Betaproteobacteria bacterium RIFCSPLOWO2_02_FULL_67_26]
-2	Complex II	OGA21977	OGA21975.1	SDHC/FRDC	PF02300.15@Fumarate_red_C@Fumarate reductase subunit C;		hypothetical protein A3I02_07085 [Betaproteobacteria bacterium RIFCSPLOWO2_02_FULL_67_26]
-1	Complex II	OGA21977	OGA21976.1	SDHD/FRDD	PF02313.15@Fumarate_red_D@Fumarate reductase subunit D;		hypothetical protein A3I02_07090 [Betaproteobacteria bacterium RIFCSPLOWO2_02_FULL_67_26]
0	Complex II	OGA21977	OGA21977.1	RQUA	PF13649.4@Methyltransf_25@Methyltransferase domain;PF08241.10@Methyltransf_11@Methyltransferase domain;PF01209.16@Ubie_methyltran@ubiE/COQ5 methyltransferase family;PF05401.9@NodS@Nodulation protein S (NodS);PF13489.4@Methyltransf_23@Methyltransferase domain;PF13847.4@Methyltransf_31@Methyltransferase domain;		methyltransferase [Betaproteobacteria bacterium RIFCSPLOWO2_02_FULL_67_26]
1	Complex II	OGA21977	OGA21978.1		PF01053.18@Cys_Met_Meta_PP@Cys/Met metabolism PLP-dependent enzyme;PF00155.19@Aminotran_1_2@Aminotransferase class I and II;		hypothetical protein A3I02_07100 [Betaproteobacteria bacterium RIFCSPLOWO2_02_FULL_67_26]
2	Complex II	OGA21977	OGA21979.1		PF13522.4@GATase_6@Glutamine amidotransferase domain;PF13537.4@GATase_7@Glutamine amidotransferase domain;PF00156.25@Pribosyltran@Phosphoribosyl transferase domain;		amidophosphoribosyltransferase [Betaproteobacteria bacterium RIFCSPLOWO2_02_FULL_67_26]
3	Complex II	OGA21977	OGA21980.1		PF02674.14@Colicin_V@Colicin V production protein;		colicin V production protein [Betaproteobacteria bacterium RIFCSPLOWO2_02_FULL_67_26]
4	Complex II	OGA21977	OGA21981.1		PF05036.11@SPOR@Sporulation related domain;		hypothetical protein A3I02_07115 [Betaproteobacteria bacterium RIFCSPLOWO2_02_FULL_67_26]
5	Complex II	OGA21977	OGA21982.1		PF08245.10@Mur_ligase_M@Mur ligase middle domain;PF02875.19@Mur_ligase_C@Mur ligase family, glutamate ligase domain;		bifunctional folylpolyglutamate synthase/dihydrofolate synthase [Betaproteobacteria bacterium RIFCSPLOWO2_02_FULL_67_26]
6	Complex II	OGA21977	OGA21983.1		PF01039.20@Carboxyl_trans@Carboxyl transferase domain;		acetyl-CoA carboxylase subunit beta [Betaproteobacteria bacterium RIFCSPLOWO2_02_FULL_67_26]
7	Complex II	OGA21977	OGA21984.1		PF00290.18@Trp_syntA@Tryptophan synthase alpha chain;		tryptophan synthase subunit alpha [Betaproteobacteria bacterium RIFCSPLOWO2_02_FULL_67_26]
8	Complex II	OGA21977	OGA21985.1		PF00291.23@PALP@Pyridoxal-phosphate dependent enzyme;		tryptophan synthase subunit beta [Betaproteobacteria bacterium RIFCSPLOWO2_02_FULL_67_26]
9	Complex II	OGA21977	OGA21986.1		PF00697.20@PRAI@N-(5'phosphoribosyl)anthranilate (PRA) isomerase;		N-(5'-phosphoribosyl)anthranilate isomerase [Betaproteobacteria bacterium RIFCSPLOWO2_02_FULL_67_26]
10	Complex II	OGA21977	OGA21987.1		No Hit;		hypothetical protein A3I02_07150 [Betaproteobacteria bacterium RIFCSPLOWO2_02_FULL_67_26]
11	Complex II	OGA21977	OGA21947.1		PF00584.18@SecE@SecE/Sec61-gamma subunits of protein translocation complex;		preprotein translocase subunit SecE [Betaproteobacteria bacterium RIFCSPLOWO2_02_FULL_67_26]
12	Complex II	OGA21977	OGA21957.1		PF02357.17@NusG@Transcription termination factor nusG;		transcription termination/antitermination protein NusG [Betaproteobacteria bacterium RIFCSPLOWO2_02_FULL_67_26]
13	Complex II	OGA21977	OGA21948.1		PF03946.12@Ribosomal_L11_N@Ribosomal protein L11, N-terminal domain;PF00298.17@Ribosomal_L11@Ribosomal protein L11, RNA binding domain;		50S ribosomal protein L11 [Betaproteobacteria bacterium RIFCSPLOWO2_02_FULL_67_26]
-15	Complex II	WP_008969144	WP_008969205.1		PF00515.26@TPR_1@Tetratricopeptide repeat;PF07719.15@TPR_2@Tetratricopeptide repeat;PF13181.4@TPR_8@Tetratricopeptide repeat;PF13424.4@TPR_12@Tetratricopeptide repeat;PF14559.4@TPR_19@Tetratricopeptide repeat;PF13428.4@TPR_14@Tetratricopeptide repeat;PF13432.4@TPR_16@Tetratricopeptide repeat;PF12895.5@ANAPC3@Anaphase-promoting complex, cyclosome, subunit 3;PF13374.4@TPR_10@Tetratricopeptide repea…		hypothetical protein [Bradyrhizobium sp. STM 3843]
-14	Complex II	WP_008969144	WP_035981522.1		No Hit;		hypothetical protein [Bradyrhizobium sp. STM 3843]
-13	Complex II	WP_008969144	WP_050886423.1		PF03781.14@FGE-sulfatase@Sulfatase-modifying factor enzyme 1;PF00211.18@Guanylate_cyc@Adenylate and Guanylate cyclase catalytic domain;		hypothetical protein, partial [Bradyrhizobium sp. STM 3843]
-12	Complex II	WP_008969144	WP_008969146.1		PF01554.16@MatE@MatE;		MATE family efflux transporter [Bradyrhizobium sp. STM 3843]
-11	Complex II	WP_008969144	WP_008969147.1		PF12706.5@Lactamase_B_2@Beta-lactamase superfamily domain;PF00753.25@Lactamase_B@Metallo-beta-lactamase superfamily;		MBL fold metallo-hydrolase [Bradyrhizobium sp. STM 3843]
-10	Complex II	WP_008969144	WP_008969148.1		No Hit;		hypothetical protein [Bradyrhizobium sp. STM 3843]
-9	Complex II	WP_008969144	WP_008969149.1		PF01068.19@DNA_ligase_A_M@ATP dependent DNA ligase domain;PF04679.13@DNA_ligase_A_C@ATP dependent DNA ligase C terminal region;PF04675.12@DNA_ligase_A_N@DNA ligase N terminus;		ATP-dependent DNA ligase [Bradyrhizobium sp. STM 3843]
-8	Complex II	WP_008969144	WP_035981513.1		No Hit;		DNA ligase-associated DEXH box helicase [Bradyrhizobium sp. STM 3843]
-7	Complex II	WP_008969144	WP_008969151.1		PF08241.10@Methyltransf_11@Methyltransferase domain;PF13649.4@Methyltransf_25@Methyltransferase domain;PF13847.4@Methyltransf_31@Methyltransferase domain;PF08242.10@Methyltransf_12@Methyltransferase domain;PF13489.4@Methyltransf_23@Methyltransferase domain;PF13181.4@TPR_8@Tetratricopeptide repeat;PF13414.4@TPR_11@TPR repeat;PF07719.15@TPR_2@Tetratricopeptide repeat;PF13432.4@TPR_16@Tetratricopept…		SAM-dependent methyltransferase [Bradyrhizobium sp. STM 3843]
-6	Complex II	WP_008969144	WP_008969152.1		PF13458.4@Peripla_BP_6@Periplasmic binding protein;PF01094.26@ANF_receptor@Receptor family ligand binding region;		branched-chain amino acid ABC transporter substrate-binding protein [Bradyrhizobium sp. STM 3843]
-5	Complex II	WP_008969144	WP_008969139.1		PF00012.18@HSP70@Hsp70 protein;PF06723.11@MreB_Mbl@MreB/Mbl protein;		Hsp70 family protein [Bradyrhizobium sp. STM 3843]
-4	Complex II	WP_008969144	WP_008969140.1		No Hit;		hypothetical protein [Bradyrhizobium sp. STM 3843]
-3	Complex II	WP_008969144	WP_035981504.1		PF13302.5@Acetyltransf_3@Acetyltransferase (GNAT) domain;		N-acetyltransferase [Bradyrhizobium sp. STM 3843]
-2	Complex II	WP_008969144	WP_008969142.1		PF00561.18@Abhydrolase_1@alpha/beta hydrolase fold;PF12697.5@Abhydrolase_6@Alpha/beta hydrolase family;		alpha/beta hydrolase [Bradyrhizobium sp. STM 3843]
-1	Complex II	WP_008969144	WP_008969143.1		PF00486.26@Trans_reg_C@Transcriptional regulatory protein, C terminal;PF13431.4@TPR_17@Tetratricopeptide repeat;		transcriptional regulator [Bradyrhizobium sp. STM 3843]
0	Complex II	WP_008969144	WP_008969144.1	RQUA	PF13649.4@Methyltransf_25@Methyltransferase domain;PF13489.4@Methyltransf_23@Methyltransferase domain;PF08242.10@Methyltransf_12@Methyltransferase domain;		class I SAM-dependent methyltransferase [Bradyrhizobium sp. STM 3843]
1	Complex II	WP_008969144	WP_008969145.1	SDHD/FRDD	PF02313.15@Fumarate_red_D@Fumarate reductase subunit D;		fumarate reductase subunit D [Bradyrhizobium sp. STM 3843]
2	Complex II	WP_008969144	WP_008969051.1		No Hit;		hypothetical protein [Bradyrhizobium sp. STM 3843]
3	Complex II	WP_008969144	WP_008969052.1		PF08379.8@Bact_transglu_N@Bacterial transglutaminase-like N-terminal region;PF01841.17@Transglut_core@Transglutaminase-like superfamily;		transglutaminase family protein [Bradyrhizobium sp. STM 3843]
4	Complex II	WP_008969144	WP_008969053.1		PF14403.4@CP_ATPgrasp_2@Circularly permuted ATP-grasp type 2;PF04174.11@CP_ATPgrasp_1@A circularly permuted ATPgrasp;PF04168.10@Alpha-E@A predicted alpha-helical domain with a conserved ER motif.;		hypothetical protein [Bradyrhizobium sp. STM 3843]
5	Complex II	WP_008969144	WP_008969054.1		PF09899.7@DUF2126@Putative amidoligase enzyme (DUF2126);PF08379.8@Bact_transglu_N@Bacterial transglutaminase-like N-terminal region;PF01841.17@Transglut_core@Transglutaminase-like superfamily;		IMP dehydrogenase [Bradyrhizobium sp. STM 3843]
6	Complex II	WP_008969144	WP_008969057.1		No Hit;		hypothetical protein [Bradyrhizobium sp. STM 3843]
7	Complex II	WP_008969144	WP_008969058.1		PF04295.11@GD_AH_C@D-galactarate dehydratase / Altronate hydrolase, C terminus;PF08666.10@SAF@SAF domain;		altronate dehydratase [Bradyrhizobium sp. STM 3843]
8	Complex II	WP_008969144	WP_035981473.1		PF03328.12@HpcH_HpaI@HpcH/HpaI aldolase/citrate lyase family;		2,4-dihydroxyhept-2-ene-1,7-dioic acid aldolase [Bradyrhizobium sp. STM 3843]
9	Complex II	WP_008969144	WP_008969060.1		PF02615.12@Ldh_2@Malate/L-lactate dehydrogenase;		malate/lactate/ureidoglycolate dehydrogenase [Bradyrhizobium sp. STM 3843]
10	Complex II	WP_008969144	WP_035981490.1		PF00005.25@ABC_tran@ABC transporter;PF13304.4@AAA_21@AAA domain, putative AbiEii toxin, Type IV TA system;		ABC transporter ATP-binding protein [Bradyrhizobium sp. STM 3843]
11	Complex II	WP_008969144	WP_008969062.1		PF02653.14@BPD_transp_2@Branched-chain amino acid transport system / permease component;PF00005.25@ABC_tran@ABC transporter;PF13304.4@AAA_21@AAA domain, putative AbiEii toxin, Type IV TA system;		ABC transporter [Bradyrhizobium sp. STM 3843]
12	Complex II	WP_008969144	WP_008969063.1		PF02653.14@BPD_transp_2@Branched-chain amino acid transport system / permease component;		branched-chain amino acid ABC transporter permease [Bradyrhizobium sp. STM 3843]
13	Complex II	WP_008969144	WP_008969064.1		PF13458.4@Peripla_BP_6@Periplasmic binding protein;PF01094.26@ANF_receptor@Receptor family ligand binding region;PF13433.4@Peripla_BP_5@Periplasmic binding protein domain;		ABC transporter substrate-binding protein [Bradyrhizobium sp. STM 3843]
14	Complex II	WP_008969144	WP_008969066.1		PF12802.5@MarR_2@MarR family;PF01047.20@MarR@MarR family;PF13463.4@HTH_27@Winged helix DNA-binding domain;		homoprotocatechuate degradation operon regulator HpaR [Bradyrhizobium sp. STM 3843]
15	Complex II	WP_008969144	WP_008969067.1		No Hit;		2-oxo-hepta-3-ene-1,7-dioic acid hydratase [Bradyrhizobium sp. STM 3843]
-15	Complex II	WP_012590738	WP_012590724.1		PF01053.18@Cys_Met_Meta_PP@Cys/Met metabolism PLP-dependent enzyme;		cystathionine beta-lyase [Methylocella silvestris]
-14	Complex II	WP_012590738	WP_012590725.1		No Hit;		hypothetical protein [Methylocella silvestris]
-13	Complex II	WP_012590738	WP_041367799.1		No Hit;		hypothetical protein [Methylocella silvestris]
-12	Complex II	WP_012590738	WP_012590727.1		No Hit;		hypothetical protein [Methylocella silvestris]
-11	Complex II	WP_012590738	WP_041367800.1		No Hit;		hypothetical protein [Methylocella silvestris]
-10	Complex II	WP_012590738	WP_012590729.1		PF01268.17@FTHFS@Formate--tetrahydrofolate ligase;		formate--tetrahydrofolate ligase [Methylocella silvestris]
-9	Complex II	WP_012590738	WP_012590730.1		PF02826.17@2-Hacid_dh_C@D-isomer specific 2-hydroxyacid dehydrogenase, NAD binding domain;PF00389.28@2-Hacid_dh@D-isomer specific 2-hydroxyacid dehydrogenase, catalytic domain;		glycerate dehydrogenase [Methylocella silvestris]
-8	Complex II	WP_012590738	WP_012590731.1		PF00266.17@Aminotran_5@Aminotransferase class-V;		aminotransferase class V-fold PLP-dependent enzyme [Methylocella silvestris]
-7	Complex II	WP_012590738	WP_012590732.1		PF13660.4@DUF4147@Domain of unknown function (DUF4147);PF05161.11@MOFRL@MOFRL family;		glycerate kinase [Methylocella silvestris]
-6	Complex II	WP_012590738	WP_041368804.1		PF08442.8@ATP-grasp_2@ATP-grasp domain;PF00549.17@Ligase_CoA@CoA-ligase;PF13549.4@ATP-grasp_5@ATP-grasp domain;		succinyl-CoA synthetase subunit beta [Methylocella silvestris]
-5	Complex II	WP_012590738	WP_012590734.1		PF02629.17@CoA_binding@CoA binding domain;PF00549.17@Ligase_CoA@CoA-ligase;PF13607.4@Succ_CoA_lig@Succinyl-CoA ligase like flavodoxin domain;		succinate--CoA ligase subunit alpha [Methylocella silvestris]
-4	Complex II	WP_012590738	WP_041367803.1		No Hit;		hypothetical protein [Methylocella silvestris]
-3	Complex II	WP_012590738	WP_012590735.1		PF00311.15@PEPcase@Phosphoenolpyruvate carboxylase;		phosphoenolpyruvate carboxylase [Methylocella silvestris]
-2	Complex II	WP_012590738	WP_012590736.1		PF03328.12@HpcH_HpaI@HpcH/HpaI aldolase/citrate lyase family;PF15617.4@C-C_Bond_Lyase@C-C_Bond_Lyase of the TIM-Barrel fold;		CoA ester lyase [Methylocella silvestris]
-1	Complex II	WP_012590738	WP_012590737.1		PF03091.13@CutA1@CutA1 divalent ion tolerance protein;		divalent-cation tolerance protein CutA [Methylocella silvestris]
0	Complex II	WP_012590738	WP_012590738.1	RQUA	PF01209.16@Ubie_methyltran@ubiE/COQ5 methyltransferase family;		methyltransferase [Methylocella silvestris]
1	Complex II	WP_012590738	WP_012590739.1	SDHD/FRDD	PF02313.15@Fumarate_red_D@Fumarate reductase subunit D;		fumarate reductase subunit FrdD [Methylocella silvestris]
2	Complex II	WP_012590738	WP_012590740.1	SDHC/FRDC	PF02300.15@Fumarate_red_C@Fumarate reductase subunit C;		fumarate reductase subunit C [Methylocella silvestris]
3	Complex II	WP_012590738	WP_012590741.1	SDHB/FRDB	PF13085.4@Fer2_3@2Fe-2S iron-sulfur cluster binding domain;PF13183.4@Fer4_8@4Fe-4S dicluster domain;PF13237.4@Fer4_10@4Fe-4S dicluster domain;PF13187.4@Fer4_9@4Fe-4S dicluster domain;PF13534.4@Fer4_17@4Fe-4S dicluster domain;		succinate dehydrogenase/fumarate reductase iron-sulfur subunit [Methylocella silvestris]
4	Complex II	WP_012590738	WP_012590742.1	SDHA/FRDA	PF00890.22@FAD_binding_2@FAD binding domain;PF02910.18@Succ_DH_flav_C@Fumarate reductase flavoprotein C-term;PF07992.12@Pyr_redox_2@Pyridine nucleotide-disulphide oxidoreductase;		fumarate reductase (quinol) flavoprotein subunit [Methylocella silvestris]
5	Complex II	WP_012590738	WP_012590743.1		PF00939.17@Na_sulph_symp@Sodium:sulfate symporter transmembrane region;PF03600.14@CitMHS@Citrate transporter;		ABC transporter permease [Methylocella silvestris]
6	Complex II	WP_012590738	WP_041367808.1		No Hit;		hypothetical protein [Methylocella silvestris]
7	Complex II	WP_012590738	WP_012590744.1		No Hit;		hypothetical protein [Methylocella silvestris]
8	Complex II	WP_012590738	WP_012590745.1		PF00174.17@Oxidored_molyb@Oxidoreductase molybdopterin binding domain;		molybdopterin-binding oxidoreductase [Methylocella silvestris]
9	Complex II	WP_012590738	WP_041367811.1		PF15639.4@Tox-MPTase3@Metallopeptidase toxin 3;		hypothetical protein [Methylocella silvestris]
10	Complex II	WP_012590738	WP_012590748.1		PF01028.18@Topoisom_I@Eukaryotic DNA topoisomerase I, catalytic core;		DNA topoisomerase I [Methylocella silvestris]
11	Complex II	WP_012590738	WP_012590749.1		PF05559.9@DUF763@Protein of unknown function (DUF763);		DUF763 domain-containing protein [Methylocella silvestris]
12	Complex II	WP_012590738	WP_012590750.1		PF02735.14@Ku@Ku70/Ku80 beta-barrel domain;		Ku protein [Methylocella silvestris]
13	Complex II	WP_012590738	WP_012590751.1		PF02735.14@Ku@Ku70/Ku80 beta-barrel domain;		non-homologous end joining protein Ku [Methylocella silvestris]
14	Complex II	WP_012590738	WP_012590752.1		PF13298.4@LigD_N@DNA polymerase Ligase (LigD);PF04679.13@DNA_ligase_A_C@ATP dependent DNA ligase C terminal region;PF01068.19@DNA_ligase_A_M@ATP dependent DNA ligase domain;		ATP-dependent DNA ligase [Methylocella silvestris]
15	Complex II	WP_012590738	WP_012590753.1		PF01593.22@Amino_oxidase@Flavin containing amine oxidoreductase;PF13450.4@NAD_binding_8@NAD(P)-binding Rossmann-like domain;		amine oxidase [Methylocella silvestris]
-15	Complex II	WP_013417803	WP_013417788.1		PF16576.3@HlyD_D23@Barrel-sandwich domain of CusB or HlyD membrane-fusion;PF13533.4@Biotin_lipoyl_2@Biotin-lipoyl like;PF13437.4@HlyD_3@HlyD family secretion protein;		efflux RND transporter periplasmic adaptor subunit [Rhodomicrobium vannielii]
-14	Complex II	WP_013417803	WP_041787134.1		No Hit;		hypothetical protein [Rhodomicrobium vannielii]
-13	Complex II	WP_013417803	WP_013417790.1	SDHA/FRDA	PF00890.22@FAD_binding_2@FAD binding domain;PF02910.18@Succ_DH_flav_C@Fumarate reductase flavoprotein C-term;		succinate dehydrogenase flavoprotein subunit [Rhodomicrobium vannielii]
-12	Complex II	WP_013417803	WP_013417791.1	SDHC/FRDC	PF01127.20@Sdh_cyt@Succinate dehydrogenase/Fumarate reductase transmembrane subunit;		MULTISPECIES: succinate dehydrogenase, hydrophobic membrane anchor protein [Rhodomicrobium]
-11	Complex II	WP_013417803	WP_013417792.1	SDHC/FRDC	PF01127.20@Sdh_cyt@Succinate dehydrogenase/Fumarate reductase transmembrane subunit;		succinate dehydrogenase, cytochrome b556 subunit [Rhodomicrobium vannielii]
-10	Complex II	WP_013417803	WP_013417793.1		PF01575.17@MaoC_dehydratas@MaoC like domain;		hypothetical protein [Rhodomicrobium vannielii]
-9	Complex II	WP_013417803	WP_013417794.1		PF02597.18@ThiS@ThiS family;		molybdopterin converting factor subunit 1 [Rhodomicrobium vannielii]
-8	Complex II	WP_013417803	WP_013417795.1		PF01066.19@CDP-OH_P_transf@CDP-alcohol phosphatidyltransferase;		CDP-alcohol phosphatidyltransferase [Rhodomicrobium vannielii]
-7	Complex II	WP_013417803	WP_013417796.1		PF02091.13@tRNA-synt_2e@Glycyl-tRNA synthetase alpha subunit;		MULTISPECIES: glycine--tRNA ligase subunit alpha [Rhodomicrobium]
-6	Complex II	WP_013417803	WP_013417797.1		PF01546.26@Peptidase_M20@Peptidase family M20/M25/M40;PF07687.12@M20_dimer@Peptidase dimerisation domain;PF04389.15@Peptidase_M28@Peptidase family M28;		acetylornithine deacetylase [Rhodomicrobium vannielii]
-5	Complex II	WP_013417803	WP_013417798.1		PF00709.19@Adenylsucc_synt@Adenylosuccinate synthetase;		adenylosuccinate synthase [Rhodomicrobium vannielii]
-4	Complex II	WP_013417803	WP_013417799.1		PF00892.18@EamA@EamA-like transporter family;		EamA/RhaT family transporter [Rhodomicrobium vannielii]
-3	Complex II	WP_013417803	WP_013417800.1		PF04328.11@Sel_put@Selenoprotein, putative;		DUF466 domain-containing protein [Rhodomicrobium vannielii]
-2	Complex II	WP_013417803	WP_041787891.1		PF02554.12@CstA@Carbon starvation protein CstA;PF13722.4@CstA_5TM@5TM C-terminal transporter carbon starvation CstA;		carbon starvation protein A [Rhodomicrobium vannielii]
-1	Complex II	WP_013417803	WP_013417802.1		PF00488.19@MutS_V@MutS domain V;PF01624.18@MutS_I@MutS domain I;PF05192.16@MutS_III@MutS domain III;PF05190.16@MutS_IV@MutS family domain IV;PF05188.15@MutS_II@MutS domain II;		DNA mismatch repair protein MutS [Rhodomicrobium vannielii]
0	Complex II	WP_013417803	WP_013417803.1	RQUA	PF13649.4@Methyltransf_25@Methyltransferase domain;PF01209.16@Ubie_methyltran@ubiE/COQ5 methyltransferase family;PF08241.10@Methyltransf_11@Methyltransferase domain;PF08242.10@Methyltransf_12@Methyltransferase domain;PF13489.4@Methyltransf_23@Methyltransferase domain;		class I SAM-dependent methyltransferase [Rhodomicrobium vannielii]
1	Complex II	WP_013417803	WP_013417804.1		PF07568.10@HisKA_2@Histidine kinase;PF02518.24@HATPase_c@Histidine kinase-, DNA gyrase B-, and HSP90-like ATPase;PF13188.5@PAS_8@PAS domain;PF13581.4@HATPase_c_2@Histidine kinase-like ATPase domain;PF07536.12@HWE_HK@HWE histidine kinase;PF13426.5@PAS_9@PAS domain;PF08448.8@PAS_4@PAS fold;		sensor histidine kinase [Rhodomicrobium vannielii]
2	Complex II	WP_013417803	WP_013417805.1		PF01055.24@Glyco_hydro_31@Glycosyl hydrolases family 31;PF13802.4@Gal_mutarotas_2@Galactose mutarotase-like;		glycoside hydrolase [Rhodomicrobium vannielii]
3	Complex II	WP_013417803	WP_013417806.1		PF01795.17@Methyltransf_5@MraW methylase family;		16S rRNA (cytosine(1402)-N(4))-methyltransferase RsmH [Rhodomicrobium vannielii]
4	Complex II	WP_013417803	WP_013417807.1		PF02381.16@MraZ@MraZ protein, putative antitoxin-like;		MULTISPECIES: MraZ domain-containing protein [Rhodomicrobium]
5	Complex II	WP_013417803	WP_013417808.1		PF00501.26@AMP-binding@AMP-binding enzyme;PF13193.4@AMP-binding_C@AMP-binding enzyme C-terminal domain;		acetoacetate--CoA ligase [Rhodomicrobium vannielii]
6	Complex II	WP_013417803	WP_041787139.1		PF05170.12@AsmA@AsmA family;		hypothetical protein [Rhodomicrobium vannielii]
7	Complex II	WP_013417803	WP_041787141.1		PF17036.3@CBP_BcsS@Cellulose biosynthesis protein BcsS;		hypothetical protein [Rhodomicrobium vannielii]
8	Complex II	WP_013417803	WP_049779153.1		PF00561.18@Abhydrolase_1@alpha/beta hydrolase fold;PF12697.5@Abhydrolase_6@Alpha/beta hydrolase family;PF12146.6@Hydrolase_4@Serine aminopeptidase, S33;		alpha/beta hydrolase [Rhodomicrobium vannielii]
9	Complex II	WP_013417803	WP_041787896.1		PF00005.25@ABC_tran@ABC transporter;PF03459.15@TOBE@TOBE domain;		molybdenum ABC transporter ATP-binding protein [Rhodomicrobium vannielii]
10	Complex II	WP_013417803	WP_013417813.1		PF00528.20@BPD_transp_1@Binding-protein-dependent transport system inner membrane component;		molybdate ABC transporter permease subunit [Rhodomicrobium vannielii]
11	Complex II	WP_013417803	WP_013417814.1		PF13531.4@SBP_bac_11@Bacterial extracellular solute-binding protein;PF01547.23@SBP_bac_1@Bacterial extracellular solute-binding protein;PF12974.5@Phosphonate-bd@ABC transporter, phosphonate, periplasmic substrate-binding protein;		molybdate ABC transporter substrate-binding protein [Rhodomicrobium vannielii]
12	Complex II	WP_013417803	WP_013417815.1		PF00311.15@PEPcase@Phosphoenolpyruvate carboxylase;		phosphoenolpyruvate carboxylase [Rhodomicrobium vannielii]
13	Complex II	WP_013417803	WP_013417816.1		PF03459.15@TOBE@TOBE domain;		MULTISPECIES: transporter [Rhodomicrobium]
14	Complex II	WP_013417803	WP_013417817.1		No Hit;		protein-tyrosine-phosphatase [Rhodomicrobium vannielii]
15	Complex II	WP_013417803	WP_013417818.1		PF00501.26@AMP-binding@AMP-binding enzyme;PF13193.4@AMP-binding_C@AMP-binding enzyme C-terminal domain;PF16177.3@ACAS_N@Acetyl-coenzyme A synthetase N-terminus;		propionyl-CoA synthetase [Rhodomicrobium vannielii]
-15	Complex II	WP_015765501	WP_041567703.1		No Hit;		hypothetical protein [Candidatus Accumulibacter phosphatis]
-14	Complex II	WP_015765501	WP_015765491.1		PF04397.13@LytTR@LytTr DNA-binding domain;PF00072.22@Response_reg@Response regulator receiver domain;		two-component system response regulator YehT [Candidatus Accumulibacter phosphatis]
-13	Complex II	WP_015765501	WP_015765492.1		PF07694.10@5TM-5TMR_LYT@5TMR of 5TMR-LYT;PF06580.11@His_kinase@Histidine kinase;		sensor histidine kinase [Candidatus Accumulibacter phosphatis]
-12	Complex II	WP_015765501	WP_015765493.1		PF09906.7@DUF2135@Uncharacterized protein conserved in bacteria (DUF2135);PF13371.4@TPR_9@Tetratricopeptide repeat;		DUF2135 domain-containing protein [Candidatus Accumulibacter phosphatis]
-11	Complex II	WP_015765501	WP_012806121.1		No Hit;		hypothetical protein [Candidatus Accumulibacter phosphatis]
-10	Complex II	WP_015765501	WP_012806122.1		PF13401.4@AAA_22@AAA domain;PF13191.4@AAA_16@AAA ATPase domain;PF13604.4@AAA_30@AAA domain;		ATPase AAA [Candidatus Accumulibacter phosphatis]
-9	Complex II	WP_015765501	WP_012806985.1		PF00665.24@rve@Integrase core domain;PF13565.4@HTH_32@Homeodomain-like domain;PF13683.4@rve_3@Integrase core domain;		integrase [Candidatus Accumulibacter phosphatis]
-8	Complex II	WP_015765501	WP_012806124.1		No Hit;		hypothetical protein [Candidatus Accumulibacter phosphatis]
-7	Complex II	WP_015765501	WP_081444101.1		PF08487.8@VIT@Vault protein inter-alpha-trypsin domain;		hypothetical protein [Candidatus Accumulibacter phosphatis]
-6	Complex II	WP_015765501	WP_015765495.1		PF01312.17@Bac_export_2@FlhB HrpN YscU SpaS Family;		flagellar biosynthesis protein [Candidatus Accumulibacter phosphatis]
-5	Complex II	WP_015765501	WP_015765496.1		PF07317.10@YcgR@Flagellar regulator YcgR;PF07238.12@PilZ@PilZ domain;		flagellar brake protein [Candidatus Accumulibacter phosphatis]
-4	Complex II	WP_015765501	WP_015765497.1	SDHD/FRDD	PF02313.15@Fumarate_red_D@Fumarate reductase subunit D;		fumarate reductase subunit FrdD [Candidatus Accumulibacter phosphatis]
-3	Complex II	WP_015765501	WP_015765498.1	SDHC/FRDC	PF02300.15@Fumarate_red_C@Fumarate reductase subunit C;		fumarate reductase subunit C [Candidatus Accumulibacter phosphatis]
-2	Complex II	WP_015765501	WP_015765499.1	SDHB/FRDB	PF13085.4@Fer2_3@2Fe-2S iron-sulfur cluster binding domain;PF13183.4@Fer4_8@4Fe-4S dicluster domain;PF13237.4@Fer4_10@4Fe-4S dicluster domain;PF13534.4@Fer4_17@4Fe-4S dicluster domain;PF13187.4@Fer4_9@4Fe-4S dicluster domain;		succinate dehydrogenase/fumarate reductase iron-sulfur subunit [Candidatus Accumulibacter phosphatis]
-1	Complex II	WP_015765501	WP_015765500.1	SDHA/FRDA	PF00890.22@FAD_binding_2@FAD binding domain;PF02910.18@Succ_DH_flav_C@Fumarate reductase flavoprotein C-term;PF07992.12@Pyr_redox_2@Pyridine nucleotide-disulphide oxidoreductase;PF01946.15@Thi4@Thi4 family;		fumarate reductase (quinol) flavoprotein subunit [Candidatus Accumulibacter phosphatis]
0	Complex II	WP_015765501	WP_015765501.1	RQUA	PF13649.4@Methyltransf_25@Methyltransferase domain;PF01209.16@Ubie_methyltran@ubiE/COQ5 methyltransferase family;PF08241.10@Methyltransf_11@Methyltransferase domain;		class I SAM-dependent methyltransferase [Candidatus Accumulibacter phosphatis]
1	Complex II	WP_015765501	WP_015765502.1		PF01026.19@TatD_DNase@TatD related DNase;		TatD family deoxyribonuclease [Candidatus Accumulibacter phosphatis]
2	Complex II	WP_015765501	WP_015765503.1		PF01266.22@DAO@FAD dependent oxidoreductase;PF13450.4@NAD_binding_8@NAD(P)-binding Rossmann-like domain;PF02558.14@ApbA@Ketopantoate reductase PanE/ApbA;PF00070.25@Pyr_redox@Pyridine nucleotide-disulphide oxidoreductase;		D-amino acid dehydrogenase [Candidatus Accumulibacter phosphatis]
3	Complex II	WP_015765501	WP_015765504.1		PF13328.4@HD_4@HD domain;PF04607.15@RelA_SpoT@Region found in RelA / SpoT proteins;PF13291.4@ACT_4@ACT domain;PF02824.19@TGS@TGS domain;PF01966.20@HD@HD domain;		bifunctional (p)ppGpp synthetase/guanosine-3',5'-bis(diphosphate) 3'-pyrophosphohydrolase [Candidatus Accumulibacter phosphatis]
4	Complex II	WP_015765501	WP_015765505.1		PF01192.20@RNA_pol_Rpb6@RNA polymerase Rpb6;		DNA-directed RNA polymerase subunit omega [Candidatus Accumulibacter phosphatis]
5	Complex II	WP_015765501	WP_015765506.1		PF00625.19@Guanylate_kin@Guanylate kinase;PF13671.4@AAA_33@AAA domain;		guanylate kinase [Candidatus Accumulibacter phosphatis]
6	Complex II	WP_015765501	WP_015765507.1		No Hit;		hypothetical protein [Candidatus Accumulibacter phosphatis]
7	Complex II	WP_015765501	WP_015765508.1		PF03755.11@YicC_N@YicC-like family, N-terminal region;PF08340.9@DUF1732@Domain of unknown function (DUF1732);		hypothetical protein [Candidatus Accumulibacter phosphatis]
8	Complex II	WP_015765501	WP_015765509.1		PF00069.23@Pkinase@Protein kinase domain;PF07714.15@Pkinase_Tyr@Protein tyrosine kinase;		serine/threonine protein kinase [Candidatus Accumulibacter phosphatis]
9	Complex II	WP_015765501	WP_015765510.1		PF13672.4@PP2C_2@Protein phosphatase 2C;PF00481.19@PP2C@Protein phosphatase 2C;PF07228.10@SpoIIE@Stage II sporulation protein E (SpoIIE);		serine/threonine-protein phosphatase [Candidatus Accumulibacter phosphatis]
10	Complex II	WP_015765501	WP_015765511.1		PF01138.19@RNase_PH@3' exoribonuclease family, domain 1;PF03725.13@RNase_PH_C@3' exoribonuclease family, domain 2;		ribonuclease PH [Candidatus Accumulibacter phosphatis]
11	Complex II	WP_015765501	WP_015765512.1		PF01725.14@Ham1p_like@Ham1 family;		non-canonical purine NTP pyrophosphatase [Candidatus Accumulibacter phosphatis]
12	Complex II	WP_015765501	WP_015765513.1		PF04055.19@Radical_SAM@Radical SAM superfamily;PF06969.14@HemN_C@HemN C-terminal domain;		coproporphyrinogen III oxidase [Candidatus Accumulibacter phosphatis]
13	Complex II	WP_015765501	WP_081444102.1		PF12796.5@Ank_2@Ankyrin repeats (3 copies);PF13637.4@Ank_4@Ankyrin repeats (many copies);PF13857.4@Ank_5@Ankyrin repeats (many copies);PF00023.28@Ank@Ankyrin repeat;PF13606.4@Ank_3@Ankyrin repeat;		hypothetical protein [Candidatus Accumulibacter phosphatis]
14	Complex II	WP_015765501	WP_041568132.1		PF03544.12@TonB_C@Gram-negative bacterial TonB protein C-terminal;		energy transducer TonB [Candidatus Accumulibacter phosphatis]
15	Complex II	WP_015765501	WP_015765516.1		PF02390.15@Methyltransf_4@Putative methyltransferase;		tRNA (guanosine(46)-N7)-methyltransferase TrmB [Candidatus Accumulibacter phosphatis]
-15	Complex II	PIE83306	PIE83292.1		PF00920.19	Dehydratase family	dihydroxy-acid dehydratase [Candidatus Contendobacter odensis]
-14	Complex II	PIE83306	PIE83293.1		PF00563.18	EAL domain	hypothetical protein CSA09_02135 [Candidatus Contendobacter odensis]
-13	Complex II	PIE83306	PIE83294.1		PF02873.14	UDP-N-acetylenolpyruvoylglucosamine reductase, C-terminal domain	UDP-N-acetylenolpyruvoylglucosamine reductase [Candidatus Contendobacter odensis]
-12	Complex II	PIE83306	PIE83295.1		PF01464.18	Transglycosylase SLT domain	lytic murein transglycosylase [Candidatus Contendobacter odensis]
-11	Complex II	PIE83306	PIE83296.1		PF01464.18	Transglycosylase SLT domain	lytic transglycosylase [Candidatus Contendobacter odensis]
-10	Complex II	PIE83306	PIE83297.1		PF03976.12	Polyphosphate kinase 2 (PPK2)	polyphosphate:AMP phosphotransferase [Candidatus Contendobacter odensis]
-9	Complex II	PIE83306	PIE83371.1		PF13090.4	Polyphosphate kinase C-terminal domain	polyphosphate kinase 1 [Candidatus Contendobacter odensis]
-8	Complex II	PIE83306	PIE83298.1		PF03972.12	MmgE/PrpD family	MmgE/PrpD family protein [Candidatus Contendobacter odensis]
-7	Complex II	PIE83306	PIE83299.1		PF01844.21	HNH endonuclease	hypothetical protein CSA09_02170 [Candidatus Contendobacter odensis]
-6	Complex II	PIE83306	PIE83300.1		PF01027.18	Inhibitor of apoptosis-promoting Bax1	BAX inhibitor protein [Candidatus Contendobacter odensis]
-5	Complex II	PIE83306	PIE83301.1		No Pfam hit	No Pfam hit	hypothetical protein CSA09_02180 [Candidatus Contendobacter odensis]
-4	Complex II	PIE83306	PIE83302.1	SDHA	PF00890.22	FAD binding domain	fumarate reductase (quinol) flavoprotein subunit [Candidatus Contendobacter odensis]
-3	Complex II	PIE83306	PIE83303.1	SDHB	PF13085.4	2Fe-2S iron-sulfur cluster binding domain	succinate dehydrogenase/fumarate reductase iron-sulfur subunit [Candidatus Contendobacter odensis]
-2	Complex II	PIE83306	PIE83304.1	SDHC	PF02300.15	Fumarate reductase subunit C	fumarate reductase subunit C [Candidatus Contendobacter odensis]
-1	Complex II	PIE83306	PIE83305.1	SDHD	PF02313.15	Fumarate reductase subunit D	fumarate reductase subunit D [Candidatus Contendobacter odensis]
0	Complex II	PIE83306	PIE83306.1	RQUA	PF13649.4	Methyltransferase domain	methyltransferase [Candidatus Contendobacter odensis]
1	Complex II	PIE83306	PIE83372.1		PF00155.19	Aminotransferase class I and II	alanine transaminase [Candidatus Contendobacter odensis]
2	Complex II	PIE83306	PIE83307.1		PF00742.17	Homoserine dehydrogenase	homoserine dehydrogenase [Candidatus Contendobacter odensis]
3	Complex II	PIE83306	PIE83308.1		No Pfam hit	No Pfam hit	hypothetical protein CSA09_02220 [Candidatus Contendobacter odensis]
4	Complex II	PIE83306	PIE83309.1		PF03781.14	Sulfatase-modifying factor enzyme 1	hypothetical protein CSA09_02225 [Candidatus Contendobacter odensis]
5	Complex II	PIE83306	PIE83310.1		PF00291.23	Pyridoxal-phosphate dependent enzyme	TrpB-like pyridoxal phosphate-dependent enzyme [Candidatus Contendobacter odensis]
6	Complex II	PIE83306	PIE83311.1		PF02342.16	TerD domain	chemical-damaging agent resistance protein C [Candidatus Contendobacter odensis]
7	Complex II	PIE83306	PIE83312.1		PF02342.16	TerD domain	chemical-damaging agent resistance protein C [Candidatus Contendobacter odensis]
8	Complex II	PIE83306	PIE83313.1		PF00122.18	E1-E2 ATPase	calcium-translocating P-type ATPase, PMCA-type [Candidatus Contendobacter odensis]
9	Complex II	PIE83306	PIE83314.1		PF05099.11	Tellurite resistance protein TerB	Tellurite resistance TerB [Candidatus Contendobacter odensis]
10	Complex II	PIE83306	PIE83315.1		PF02342.16	TerD domain	hypothetical protein CSA09_02255 [Candidatus Contendobacter odensis]
11	Complex II	PIE83306	PIE83316.1		PF02342.16	TerD domain	Tellurium resistance protein terZ [Candidatus Contendobacter odensis]
12	Complex II	PIE83306	PIE83317.1		PF08238.10	Sel1 repeat	hypothetical protein CSA09_02265 [Candidatus Contendobacter odensis]
13	Complex II	PIE83306	PIE83318.1		PF08938.8	HBS1 N-terminus	hypothetical protein CSA09_02270 [Candidatus Contendobacter odensis]
14	Complex II	PIE83306	PIE83319.1		PF00436.23	Single-strand binding protein family	single-stranded DNA-binding protein [Candidatus Contendobacter odensis]
-15	Complex II	WP_046022361	WP_046022352.1		PF00873.17@ACR_tran@AcrB/AcrD/AcrF family;		hypothetical protein [Magnetospira sp. QH-2]
-14	Complex II	WP_046022361	WP_082085484.1		PF13437.4@HlyD_3@HlyD family secretion protein;PF16576.3@HlyD_D23@Barrel-sandwich domain of CusB or HlyD membrane-fusion;PF13533.4@Biotin_lipoyl_2@Biotin-lipoyl like;PF00364.20@Biotin_lipoyl@Biotin-requiring enzyme;		efflux RND transporter periplasmic adaptor subunit [Magnetospira sp. QH-2]
-13	Complex II	WP_046022361	WP_046022353.1		No Hit;		hypothetical protein [Magnetospira sp. QH-2]
-12	Complex II	WP_046022361	WP_046022354.1		No Hit;		hypothetical protein [Magnetospira sp. QH-2]
-11	Complex II	WP_046022361	WP_046022355.1		No Hit;		hypothetical protein [Magnetospira sp. QH-2]
-10	Complex II	WP_046022361	WP_046022356.1		PF00873.17@ACR_tran@AcrB/AcrD/AcrF family;PF02355.14@SecD_SecF@Protein export membrane protein;		AcrB/AcrD/AcrF family protein [Magnetospira sp. QH-2]
-9	Complex II	WP_046022361	WP_052716471.1		PF13437.4@HlyD_3@HlyD family secretion protein;PF16576.3@HlyD_D23@Barrel-sandwich domain of CusB or HlyD membrane-fusion;PF13533.4@Biotin_lipoyl_2@Biotin-lipoyl like;		efflux RND transporter periplasmic adaptor subunit [Magnetospira sp. QH-2]
-8	Complex II	WP_046022361	WP_046023434.1		PF01022.18@HTH_5@Bacterial regulatory protein, arsR family;PF12840.5@HTH_20@Helix-turn-helix domain;PF12802.5@MarR_2@MarR family;		ArsR family transcriptional regulator [Magnetospira sp. QH-2]
-7	Complex II	WP_046022361	WP_052716472.1		PF00892.18@EamA@EamA-like transporter family;		EamA/RhaT family transporter [Magnetospira sp. QH-2]
-6	Complex II	WP_046022361	WP_082085485.1		PF00149.26@Metallophos@Calcineurin-like phosphoesterase;PF12850.5@Metallophos_2@Calcineurin-like phosphoesterase superfamily domain;		hypothetical protein [Magnetospira sp. QH-2]
-5	Complex II	WP_046022361	WP_046022357.1		No Hit;		hypothetical protein [Magnetospira sp. QH-2]
-4	Complex II	WP_046022361	WP_046022358.1	SDHA/FRDA	PF00890.22@FAD_binding_2@FAD binding domain;PF02910.18@Succ_DH_flav_C@Fumarate reductase flavoprotein C-term;PF07992.12@Pyr_redox_2@Pyridine nucleotide-disulphide oxidoreductase;PF01946.15@Thi4@Thi4 family;		fumarate reductase (quinol) flavoprotein subunit [Magnetospira sp. QH-2]
-3	Complex II	WP_046022361	WP_046023437.1	SDHB/FRDB	PF13085.4@Fer2_3@2Fe-2S iron-sulfur cluster binding domain;PF13183.4@Fer4_8@4Fe-4S dicluster domain;PF13237.4@Fer4_10@4Fe-4S dicluster domain;PF13484.4@Fer4_16@4Fe-4S double cluster binding domain;PF13534.4@Fer4_17@4Fe-4S dicluster domain;PF12838.5@Fer4_7@4Fe-4S dicluster domain;PF13187.4@Fer4_9@4Fe-4S dicluster domain;PF13746.4@Fer4_18@4Fe-4S dicluster domain;		succinate dehydrogenase/fumarate reductase iron-sulfur subunit [Magnetospira sp. QH-2]
-2	Complex II	WP_046022361	WP_082085486.1	SDHC/FRDC	PF02300.15@Fumarate_red_C@Fumarate reductase subunit C;		hypothetical protein [Magnetospira sp. QH-2]
-1	Complex II	WP_046022361	WP_046022360.1	SDHD/FRDD	PF02313.15@Fumarate_red_D@Fumarate reductase subunit D;		fumarate reductase subunit D [Magnetospira sp. QH-2]
0	Complex II	WP_046022361	WP_046022361.1	RQUA	PF13649.4@Methyltransf_25@Methyltransferase domain;		class I SAM-dependent methyltransferase [Magnetospira sp. QH-2]
1	Complex II	WP_046022361	WP_046022362.1		PF00005.25@ABC_tran@ABC transporter;PF13304.4@AAA_21@AAA domain, putative AbiEii toxin, Type IV TA system;PF12848.5@ABC_tran_Xtn@ABC transporter;PF02463.17@SMC_N@RecF/RecN/SMC N terminal domain;		energy-dependent translational throttle protein EttA [Magnetospira sp. QH-2]
2	Complex II	WP_046022361	WP_052716475.1		PF04116.11@FA_hydroxylase@Fatty acid hydroxylase superfamily;		hypothetical protein [Magnetospira sp. QH-2]
3	Complex II	WP_046022361	WP_046022363.1		No Hit;		hypothetical protein [Magnetospira sp. QH-2]
4	Complex II	WP_046022361	WP_052716476.1		No Hit;		hypothetical protein [Magnetospira sp. QH-2]
5	Complex II	WP_046022361	WP_046022364.1		PF00085.18@Thioredoxin@Thioredoxin;PF13098.4@Thioredoxin_2@Thioredoxin-like domain;		thiol reductase thioredoxin [Magnetospira sp. QH-2]
6	Complex II	WP_046022361	WP_046022365.1		PF03992.14@ABM@Antibiotic biosynthesis monooxygenase;		antibiotic biosynthesis monooxygenase [Magnetospira sp. QH-2]
7	Complex II	WP_046022361	WP_046022366.1		PF12692.5@Methyltransf_17@S-adenosyl-L-methionine methyltransferase;		hypothetical protein [Magnetospira sp. QH-2]
8	Complex II	WP_046022361	WP_046022367.1		No Hit;		hypothetical protein [Magnetospira sp. QH-2]
9	Complex II	WP_046022361	WP_046022368.1		No Hit;		hypothetical protein [Magnetospira sp. QH-2]
10	Complex II	WP_046022361	WP_046022369.1		PF00849.20@PseudoU_synth_2@RNA pseudouridylate synthase;		pseudouridine synthase [Magnetospira sp. QH-2]
11	Complex II	WP_046022361	WP_052716477.1		PF00072.22@Response_reg@Response regulator receiver domain;		response regulator [Magnetospira sp. QH-2]
12	Complex II	WP_046022361	WP_046022370.1		PF10073.7@DUF2312@Uncharacterized protein conserved in bacteria (DUF2312);		DUF2312 domain-containing protein [Magnetospira sp. QH-2]
13	Complex II	WP_046022361	WP_082085487.1		PF02622.13@DUF179@Uncharacterized ACR, COG1678;		hypothetical protein [Magnetospira sp. QH-2]
14	Complex II	WP_046022361	WP_046022372.1		PF03466.18@LysR_substrate@LysR substrate binding domain;PF00126.25@HTH_1@Bacterial regulatory helix-turn-helix protein, lysR family;		LysR family transcriptional regulator [Magnetospira sp. QH-2]
15	Complex II	WP_046022361	WP_046022373.1		No Hit;		hypothetical protein [Magnetospira sp. QH-2]
-15	Complex II	WP_077926774	WP_077926760.1		PF06463.11@Mob_synth_C@Molybdenum Cofactor Synthesis C;PF04055.19@Radical_SAM@Radical SAM superfamily;PF13353.4@Fer4_12@4Fe-4S single cluster domain;		GTP 3',8-cyclase MoaA [Wohlfahrtiimonas larvae]
-14	Complex II	WP_077926774	WP_077926761.1		No Hit;		hypothetical protein [Wohlfahrtiimonas larvae]
-13	Complex II	WP_077926774	WP_077926762.1		PF05175.12@MTS@Methyltransferase small domain;PF13847.4@Methyltransf_31@Methyltransferase domain;PF13649.4@Methyltransf_25@Methyltransferase domain;PF06325.11@PrmA@Ribosomal protein L11 methyltransferase (PrmA);PF08241.10@Methyltransf_11@Methyltransferase domain;		protein-(glutamine-N5) methyltransferase, release factor-specific [Wohlfahrtiimonas larvae]
-12	Complex II	WP_077926774	WP_077926763.1		PF01925.17@TauE@Sulfite exporter TauE/SafE;		sulfite exporter TauE/SafE family protein [Wohlfahrtiimonas larvae]
-11	Complex II	WP_077926774	WP_077926764.1	SDHC/FRDC	PF01127.20@Sdh_cyt@Succinate dehydrogenase/Fumarate reductase transmembrane subunit;		succinate dehydrogenase, cytochrome b556 subunit [Wohlfahrtiimonas larvae]
-10	Complex II	WP_077926774	WP_077926765.1	SDHC/FRDC	PF01127.20@Sdh_cyt@Succinate dehydrogenase/Fumarate reductase transmembrane subunit;		succinate dehydrogenase, hydrophobic membrane anchor protein [Wohlfahrtiimonas larvae]
-9	Complex II	WP_077926774	WP_077926766.1	SDHA/FRDA	PF00890.22@FAD_binding_2@FAD binding domain;PF02910.18@Succ_DH_flav_C@Fumarate reductase flavoprotein C-term;PF07992.12@Pyr_redox_2@Pyridine nucleotide-disulphide oxidoreductase;		succinate dehydrogenase flavoprotein subunit [Wohlfahrtiimonas larvae]
-8	Complex II	WP_077926774	WP_077926767.1	SDHB/FRDB	PF13085.4@Fer2_3@2Fe-2S iron-sulfur cluster binding domain;PF13237.4@Fer4_10@4Fe-4S dicluster domain;PF13183.4@Fer4_8@4Fe-4S dicluster domain;PF13534.4@Fer4_17@4Fe-4S dicluster domain;		MULTISPECIES: succinate dehydrogenase iron-sulfur subunit [Wohlfahrtiimonas]
-7	Complex II	WP_077926774	WP_077926789.1		PF06940.9@DUF1287@Domain of unknown function (DUF1287);		DUF1287 domain-containing protein [Wohlfahrtiimonas larvae]
-6	Complex II	WP_077926774	WP_077926768.1		No Hit;		hypothetical protein [Wohlfahrtiimonas larvae]
-5	Complex II	WP_077926774	WP_077926769.1		PF04343.11@DUF488@Protein of unknown function, DUF488;		DUF488 domain-containing protein [Wohlfahrtiimonas larvae]
-4	Complex II	WP_077926774	WP_077926770.1		No Hit;		hypothetical protein [Wohlfahrtiimonas larvae]
-3	Complex II	WP_077926774	WP_077926771.1		PF03843.11@Slp@Outer membrane lipoprotein Slp family;		hypothetical protein [Wohlfahrtiimonas larvae]
-2	Complex II	WP_077926774	WP_077926772.1		PF02567.14@PhzC-PhzF@Phenazine biosynthesis-like protein;		PhzF family phenazine biosynthesis protein [Wohlfahrtiimonas larvae]
-1	Complex II	WP_077926774	WP_077926773.1		PF02493.18@MORN@MORN repeat;		phosphatidylinositol kinase [Wohlfahrtiimonas larvae]
0	Complex II	WP_077926774	WP_077926774.1	RQUA	PF13847.4@Methyltransf_31@Methyltransferase domain;PF13649.4@Methyltransf_25@Methyltransferase domain;PF08242.10@Methyltransf_12@Methyltransferase domain;		hypothetical protein [Wohlfahrtiimonas larvae]
1	Complex II	WP_077926774	WP_077926775.1		PF17191.2@RecG_wedge@RecG wedge domain;PF00271.29@Helicase_C@Helicase conserved C-terminal domain;PF00270.27@DEAD@DEAD/DEAH box helicase;PF04851.13@ResIII@Type III restriction enzyme, res subunit;PF01336.23@tRNA_anti-codon@OB-fold nucleic acid binding domain;PF00176.21@SNF2_N@SNF2 family N-terminal domain;		ATP-dependent DNA helicase RecG [Wohlfahrtiimonas larvae]
2	Complex II	WP_077926774	WP_077926776.1		PF00348.15@polyprenyl_synt@Polyprenyl synthetase;		octaprenyl diphosphate synthase [Wohlfahrtiimonas larvae]
3	Complex II	WP_077926774	WP_077926777.1		PF03710.13@GlnE@Glutamate-ammonia ligase adenylyltransferase;PF08335.9@GlnD_UR_UTase@GlnD PII-uridylyltransferase;		bifunctional [glutamate--ammonia ligase]-adenylyl-L-tyrosine phosphorylase/[glutamate--ammonia-ligase] adenylyltransferase [Wohlfahrtiimonas larvae]
4	Complex II	WP_077926774	WP_077926778.1		PF06037.9@DUF922@Bacterial protein of unknown function (DUF922);		DUF922 domain-containing protein [Wohlfahrtiimonas larvae]
5	Complex II	WP_077926774	WP_077926779.1		No Hit;		hypothetical protein [Wohlfahrtiimonas larvae]
6	Complex II	WP_077926774	WP_077926790.1		PF02386.14@TrkH@Cation transport protein;		potassium transporter [Wohlfahrtiimonas larvae]
7	Complex II	WP_077926774	WP_077926780.1		PF02878.14@PGM_PMM_I@Phosphoglucomutase/phosphomannomutase, alpha/beta/alpha domain I;PF02880.14@PGM_PMM_III@Phosphoglucomutase/phosphomannomutase, alpha/beta/alpha domain III;PF02879.14@PGM_PMM_II@Phosphoglucomutase/phosphomannomutase, alpha/beta/alpha domain II;PF00408.18@PGM_PMM_IV@Phosphoglucomutase/phosphomannomutase, C-terminal domain;		phosphoglucosamine mutase [Wohlfahrtiimonas larvae]
8	Complex II	WP_077926774	WP_077926781.1		PF07993.10@NAD_binding_4@Male sterility protein;PF01370.19@Epimerase@NAD dependent epimerase/dehydratase family;PF13460.4@NAD_binding_10@NAD(P)H-binding;PF01073.17@3Beta_HSD@3-beta hydroxysteroid dehydrogenase/isomerase family;PF05368.11@NmrA@NmrA-like family;PF04321.15@RmlD_sub_bind@RmlD substrate binding domain;PF02719.13@Polysacc_synt_2@Polysaccharide biosynthesis protein;		hypothetical protein [Wohlfahrtiimonas larvae]
9	Complex II	WP_077926774	WP_077926782.1		PF00692.17@dUTPase@dUTPase;		dUTP diphosphatase [Wohlfahrtiimonas larvae]
10	Complex II	WP_077926774	WP_077926783.1		PF00180.18@Iso_dh@Isocitrate/isopropylmalate dehydrogenase;		3-isopropylmalate dehydrogenase [Wohlfahrtiimonas larvae]
11	Complex II	WP_077926774	WP_077926784.1		PF02774.16@Semialdhyde_dhC@Semialdehyde dehydrogenase, dimerisation domain;PF01118.22@Semialdhyde_dh@Semialdehyde dehydrogenase, NAD binding domain;		aspartate-semialdehyde dehydrogenase [Wohlfahrtiimonas larvae]
12	Complex II	WP_077926774	WP_077926785.1		PF13361.4@UvrD_C@UvrD-like helicase C-terminal domain;PF13538.4@UvrD_C_2@UvrD-like helicase C-terminal domain;PF00580.19@UvrD-helicase@UvrD/REP helicase N-terminal domain;PF01443.16@Viral_helicase1@Viral (Superfamily 1) RNA helicase;PF13245.4@AAA_19@AAA domain;		ATP-dependent helicase [Wohlfahrtiimonas larvae]
13	Complex II	WP_077926774	WP_077926786.1		PF03960.13@ArsC@ArsC family;		arsenate reductase [Wohlfahrtiimonas larvae]
14	Complex II	WP_077926774	WP_077926787.1		PF04241.13@DUF423@Protein of unknown function (DUF423);		DUF423 domain-containing protein [Wohlfahrtiimonas larvae]
15	Complex II	WP_077926774	WP_077926788.1		PF00206.18@Lyase_1@Lyase;PF08328.9@ASL_C@Adenylosuccinate lyase C-terminal;		adenylosuccinate lyase [Wohlfahrtiimonas larvae]
-15	Complex II	WP_082161154	WP_048672467.1		No Hit;		hypothetical protein [Candidatus Competibacter denitrificans]
-14	Complex II	WP_082161154	WP_048672470.1		PF00248.19@Aldo_ket_red@Aldo/keto reductase family;		aldo/keto reductase [Candidatus Competibacter denitrificans]
-13	Complex II	WP_082161154	WP_048672472.1		PF02358.14@Trehalose_PPase@Trehalose-phosphatase;		trehalose-phosphatase [Candidatus Competibacter denitrificans]
-12	Complex II	WP_082161154	WP_048672473.1		PF01925.17@TauE@Sulfite exporter TauE/SafE;		membrane protein [Candidatus Competibacter denitrificans]
-11	Complex II	WP_082161154	WP_048672478.1		PF01809.16@Haemolytic@Haemolytic domain;		membrane protein insertion efficiency factor YidD [Candidatus Competibacter denitrificans]
-10	Complex II	WP_082161154	WP_048672481.1		PF04930.13@FUN14@FUN14 family;		hypothetical protein [Candidatus Competibacter denitrificans]
-9	Complex II	WP_082161154	WP_082161153.1		PF04264.11@YceI@YceI-like domain;		YceI family protein [Candidatus Competibacter denitrificans]
-8	Complex II	WP_082161154	WP_048672526.1		PF01292.18@Ni_hydr_CYTB@Prokaryotic cytochrome b561;		cytochrome b [Candidatus Competibacter denitrificans]
-7	Complex II	WP_082161154	WP_048672487.1		PF04264.11@YceI@YceI-like domain;		polyisoprenoid-binding protein [Candidatus Competibacter denitrificans]
-6	Complex II	WP_082161154	WP_048672490.1		PF03358.13@FMN_red@NADPH-dependent FMN reductase;PF12724.5@Flavodoxin_5@Flavodoxin domain;		flavodoxin family protein [Candidatus Competibacter denitrificans]
-5	Complex II	WP_082161154	WP_048672493.1		PF03466.18@LysR_substrate@LysR substrate binding domain;PF00126.25@HTH_1@Bacterial regulatory helix-turn-helix protein, lysR family;		LysR family transcriptional regulator [Candidatus Competibacter denitrificans]
-4	Complex II	WP_082161154	WP_048672497.1	SDHA/FRDA	PF00890.22@FAD_binding_2@FAD binding domain;PF02910.18@Succ_DH_flav_C@Fumarate reductase flavoprotein C-term;PF07992.12@Pyr_redox_2@Pyridine nucleotide-disulphide oxidoreductase;PF01946.15@Thi4@Thi4 family;		fumarate reductase (quinol) flavoprotein subunit [Candidatus Competibacter denitrificans]
-3	Complex II	WP_082161154	WP_048672501.1	SDHB/FRDB	PF13085.4@Fer2_3@2Fe-2S iron-sulfur cluster binding domain;PF13183.4@Fer4_8@4Fe-4S dicluster domain;PF13237.4@Fer4_10@4Fe-4S dicluster domain;PF13187.4@Fer4_9@4Fe-4S dicluster domain;PF12838.5@Fer4_7@4Fe-4S dicluster domain;PF13534.4@Fer4_17@4Fe-4S dicluster domain;		succinate dehydrogenase/fumarate reductase iron-sulfur subunit [Candidatus Competibacter denitrificans]
-2	Complex II	WP_082161154	WP_048672507.1	SDHC/FRDC	PF02300.15@Fumarate_red_C@Fumarate reductase subunit C;		hypothetical protein [Candidatus Competibacter denitrificans]
-1	Complex II	WP_082161154	WP_048672510.1	SDHD/FRDD	PF02313.15@Fumarate_red_D@Fumarate reductase subunit D;		hypothetical protein [Candidatus Competibacter denitrificans]
0	Complex II	WP_082161154	WP_082161154.1	RQUA	PF13649.4@Methyltransf_25@Methyltransferase domain;PF08241.10@Methyltransf_11@Methyltransferase domain;PF01209.16@Ubie_methyltran@ubiE/COQ5 methyltransferase family;PF13847.4@Methyltransf_31@Methyltransferase domain;PF08242.10@Methyltransf_12@Methyltransferase domain;PF05401.9@NodS@Nodulation protein S (NodS);PF13489.4@Methyltransf_23@Methyltransferase domain;		class I SAM-dependent methyltransferase [Candidatus Competibacter denitrificans]
1	Complex II	WP_082161154	WP_071244072.1	UBI binding protein	PF03364.18@Polyketide_cyc@Polyketide cyclase / dehydrase and lipid transport;PF10604.7@Polyketide_cyc2@Polyketide cyclase / dehydrase and lipid transport;		ubiquinone-binding protein [Candidatus Competibacter denitrificans]
2	Complex II	WP_082161154	WP_048672515.1		No Hit;		hypothetical protein [Candidatus Competibacter denitrificans]
3	Complex II	WP_082161154	WP_048672518.1		No Hit;		hypothetical protein [Candidatus Competibacter denitrificans]
4	Complex II	WP_082161154	WP_048672531.1		PF00294.22@PfkB@pfkB family carbohydrate kinase;PF01467.24@CTP_transf_like@Cytidylyltransferase-like;PF08543.10@Phos_pyr_kin@Phosphomethylpyrimidine kinase;		bifunctional D-glycero-beta-D-manno-heptose-7-phosphate kinase/D-glycero-beta-D-manno-heptose 1-phosphate adenylyltransferase HldE [Candidatus Competibacter denitrificans]
5	Complex II	WP_082161154	WP_082161155.1		PF01266.22@DAO@FAD dependent oxidoreductase;		FAD-dependent oxidoreductase [Candidatus Competibacter denitrificans]
6	Complex II	WP_082161154	WP_082161156.1		PF00248.19@Aldo_ket_red@Aldo/keto reductase family;		aldo/keto reductase [Candidatus Competibacter denitrificans]
7	Complex II	WP_082161154	WP_048672535.1		PF04354.11@ZipA_C@ZipA, C-terminal FtsZ-binding domain;		hypothetical protein [Candidatus Competibacter denitrificans]
8	Complex II	WP_082161154	WP_048672537.1		PF01653.16@DNA_ligase_aden@NAD-dependent DNA ligase adenylation domain;PF03120.14@DNA_ligase_OB@NAD-dependent DNA ligase OB-fold domain;PF12826.5@HHH_2@Helix-hairpin-helix motif;PF14520.4@HHH_5@Helix-hairpin-helix domain;PF00533.24@BRCT@BRCA1 C Terminus (BRCT) domain;PF03119.14@DNA_ligase_ZBD@NAD-dependent DNA ligase C4 zinc finger domain;PF12738.5@PTCB-BRCT@twin BRCT domain;		NAD-dependent DNA ligase LigA [Candidatus Competibacter denitrificans]
9	Complex II	WP_082161154	WP_082161157.1		PF13616.4@Rotamase_3@PPIC-type PPIASE domain;PF00639.19@Rotamase@PPIC-type PPIASE domain;PF13145.4@Rotamase_2@PPIC-type PPIASE domain;PF13624.4@SurA_N_3@SurA N-terminal domain;PF13623.4@SurA_N_2@SurA N-terminal domain;		hypothetical protein [Candidatus Competibacter denitrificans]
10	Complex II	WP_082161154	WP_048672543.1		PF01722.16@BolA@BolA-like protein;		BolA family transcriptional regulator [Candidatus Competibacter denitrificans]
11	Complex II	WP_082161154	WP_048672545.1		PF03795.12@YCII@YCII-related domain;		hypothetical protein [Candidatus Competibacter denitrificans]
12	Complex II	WP_082161154	WP_048672548.1		PF04279.13@IspA@Intracellular septation protein A;		septation protein A [Candidatus Competibacter denitrificans]
13	Complex II	WP_082161154	WP_048672551.1		PF01300.16@Sua5_yciO_yrdC@Telomere recombination;		threonylcarbamoyl-AMP synthase [Candidatus Competibacter denitrificans]
14	Complex II	WP_082161154	WP_048672553.1		PF02163.20@Peptidase_M50@Peptidase family M50;		site-2 protease family protein [Candidatus Competibacter denitrificans]
15	Complex II	WP_082161154	WP_048672555.1		PF00579.23@tRNA-synt_1b@tRNA synthetases class I (W and Y);		tryptophan--tRNA ligase [Candidatus Competibacter denitrificans]
15	Complex II	SEN35040	SEN34613.1		PF12911.5	N-terminal TM domain of oligopeptide transport permease C	hypothetical protein SAMN02745977_01165 [Brachymonas denitrificans DSM 15123]
14	Complex II	SEN35040	SEN34645.1		PF01636.21	Phosphotransferase enzyme family	homoserine kinase [Brachymonas denitrificans DSM 15123]
13	Complex II	SEN35040	SEN34675.1		No Pfam hit	No Pfam hit	hypothetical protein SAMN02745977_01167 [Brachymonas denitrificans DSM 15123]
12	Complex II	SEN35040	SEN34704.1		PF00476.18	DNA polymerase family A	DNA polymerase I [Brachymonas denitrificans DSM 15123]
11	Complex II	SEN35040	SEN34734.1		PF01738.16	Dienelactone hydrolase family	carboxymethylenebutenolidase [Brachymonas denitrificans DSM 15123]
10	Complex II	SEN35040	SEN34752.1		PF00581.18	Rhodanese-like domain	thiosulfate/3-mercaptopyruvate sulfurtransferase [Brachymonas denitrificans DSM 15123]
9	Complex II	SEN35040	SEN34781.1		PF00892.18	EamA-like transporter family	S-adenosylmethionine uptake transporter [Brachymonas denitrificans DSM 15123]
8	Complex II	SEN35040	SEN34815.1		PF00848.17	Ring hydroxylating alpha subunit (catalytic domain)	Phenylpropionate dioxygenase, large terminal subunit [Brachymonas denitrificans DSM 15123]
7	Complex II	SEN35040	SEN34844.1		PF02609.14	Exonuclease VII small subunit	Exodeoxyribonuclease VII small subunit [Brachymonas denitrificans DSM 15123]
6	Complex II	SEN35040	SEN34864.1		PF00348.15	Polyprenyl synthetase	farnesyl diphosphate synthase [Brachymonas denitrificans DSM 15123]
5	Complex II	SEN35040	SEN34892.1		PF13292.4	1-deoxy-D-xylulose-5-phosphate synthase	1-deoxy-D-xylulose-5-phosphate synthase [Brachymonas denitrificans DSM 15123]
4	Complex II	SEN35040	SEN34923.1		PF03480.11	Bacterial extracellular solute-binding protein, family 7	TRAP-type mannitol/chloroaromatic compound transport system, substrate-binding protein [Brachymonas denitrificans DSM 15123]
3	Complex II	SEN35040	SEN34961.1		PF06808.10	Tripartite ATP-independent periplasmic transporter, DctM component	gluconate:H symporter, GntP family [Brachymonas denitrificans DSM 15123]
2	Complex II	SEN35040	SEN34995.1		PF04290.10	Tripartite ATP-independent periplasmic transporters, DctQ component	TRAP-type mannitol/chloroaromatic compound transport system, small permease component [Brachymonas denitrificans DSM 15123]
1	Complex II	SEN35040	SEN35014.1		PF04973.10	Nicotinamide mononucleotide transporter	hypothetical protein SAMN02745977_01179 [Brachymonas denitrificans DSM 15123]
0	Complex II	SEN35040	SEN35040.1	RQUA	PF13649.4	Methyltransferase domain	Ubiquinone/menaquinone biosynthesis C-methylase UbiE [Brachymonas denitrificans DSM 15123]
-1	Complex II	SEN35040	SEN35075.1	SDHB	PF13085.4	2Fe-2S iron-sulfur cluster binding domain	succinate dehydrogenase subunit B [Brachymonas denitrificans DSM 15123]
-2	Complex II	SEN35040	SEN35101.1	SDHA	PF00890.22	FAD binding domain	fumarate reductase flavoprotein subunit [Brachymonas denitrificans DSM 15123]
-3	Complex II	SEN35040	SEN35124.1	SDHC	PF01127.20	Succinate dehydrogenase/Fumarate reductase transmembrane subunit	succinate dehydrogenase subunit C [Brachymonas denitrificans DSM 15123]
-4	Complex II	SEN35040	SEN35156.1		PF12796.5	Ankyrin repeats (3 copies)	hypothetical protein SAMN02745977_01184 [Brachymonas denitrificans DSM 15123]
-5	Complex II	SEN35040	SEN35179.1		PF01026.19	TatD related DNase	TatD DNase family protein [Brachymonas denitrificans DSM 15123]
-6	Complex II	SEN35040	SEN35216.1		PF13177.4	DNA polymerase III, delta subunit	DNA polymerase-3 subunit delta' [Brachymonas denitrificans DSM 15123]
-7	Complex II	SEN35040	SEN35256.1		PF02223.15	Thymidylate kinase	thymidylate kinase [Brachymonas denitrificans DSM 15123]
-8	Complex II	SEN35040	SEN35287.1		PF02618.14	YceG-like family	UPF0755 protein [Brachymonas denitrificans DSM 15123]
-9	Complex II	SEN35040	SEN35316.1		PF01571.19	Aminomethyltransferase folate-binding domain	hypothetical protein SAMN02745977_01189 [Brachymonas denitrificans DSM 15123]
-10	Complex II	SEN35040	SEN35345.1		PF13657.4	HipA N-terminal domain	serine/threonine-protein kinase HipA [Brachymonas denitrificans DSM 15123]
-11	Complex II	SEN35040	SEN35379.1		PF13560.4	Helix-turn-helix domain	transcriptional regulator, y4mF family [Brachymonas denitrificans DSM 15123]
-12	Complex II	SEN35040	SEN35408.1		PF14539.4	Domain of unknown function (DUF4442)	protein of unknown function [Brachymonas denitrificans DSM 15123]
-13	Complex II	SEN35040	SEN35442.1		PF02635.13	DsrE/DsrF-like family	uncharacterized protein involved in oxidation of intracellular sulfur [Brachymonas denitrificans DSM 15123]
-14	Complex II	SEN35040	SEN35472.1		PF09371.8	Tex-like protein N-terminal domain	uncharacterized protein SAMN02745977_01194 [Brachymonas denitrificans DSM 15123]
-15	Complex II	SEN35040	SEN35503.1		No Pfam hit	No Pfam hit	hypothetical protein SAMN02745977_01195 [Brachymonas denitrificans DSM 15123]
15	Complex II	EXI89591	EXI89576.1		PF13637.4	Ankyrin repeats (many copies)	ankyrin repeat protein [Candidatus Accumulibacter sp. BA-93]
14	Complex II	EXI89591	EXI89577.1		PF04055.19	Radical SAM superfamily	Oxygen-independent coproporphyrinogen-III oxidase 1 [Candidatus Accumulibacter sp. BA-93]
13	Complex II	EXI89591	EXI89578.1		PF01725.14	Ham1 family	Non-canonical purine NTP pyrophosphatase [Candidatus Accumulibacter sp. BA-93]
12	Complex II	EXI89591	EXI89579.1		PF01138.19	3' exoribonuclease family, domain 1	Ribonuclease PH [Candidatus Accumulibacter sp. BA-93]
11	Complex II	EXI89591	EXI89580.1		PF13672.4	Protein phosphatase 2C	putative protein phosphatase 2C-type [Candidatus Accumulibacter sp. BA-93]
10	Complex II	EXI89591	EXI89581.1		PF00069.23	Protein kinase domain	Serine/threonine-protein kinase D [Candidatus Accumulibacter sp. BA-93]
9	Complex II	EXI89591	EXI89582.1		PF03755.11	YicC-like family, N-terminal region	hypothetical protein AW11_01449 [Candidatus Accumulibacter sp. BA-93]
8	Complex II	EXI89591	EXI89583.1		No Pfam hit	No Pfam hit	hypothetical protein AW11_01450 [Candidatus Accumulibacter sp. BA-93]
7	Complex II	EXI89591	EXI89584.1		PF13441.4	YMGG-like Gly-zipper	hypothetical protein AW11_01451 [Candidatus Accumulibacter sp. BA-93]
6	Complex II	EXI89591	EXI89585.1		PF06411.9	HdeA/HdeB family	hypothetical protein AW11_01452 [Candidatus Accumulibacter sp. BA-93]
5	Complex II	EXI89591	EXI89586.1		PF00625.19	Guanylate kinase	Guanylate kinase [Candidatus Accumulibacter sp. BA-93]
4	Complex II	EXI89591	EXI89587.1		PF01192.20	RNA polymerase Rpb6	DNA-directed RNA polymerase subunit omega [Candidatus Accumulibacter sp. BA-93]
3	Complex II	EXI89591	EXI89588.1		PF13328.4	HD domain	Bifunctional (p)ppGpp synthase/hydrolase SpoT [Candidatus Accumulibacter sp. BA-93]
2	Complex II	EXI89591	EXI89589.1		PF01266.22	FAD dependent oxidoreductase	D-amino acid dehydrogenase small subunit [Candidatus Accumulibacter sp. BA-93]
1	Complex II	EXI89591	EXI89590.1		PF01026.19	TatD related DNase	putative deoxyribonuclease YjjV [Candidatus Accumulibacter sp. BA-93]
0	Complex II	EXI89591	EXI89591.1	RQUA	PF13649.4	Methyltransferase domain	ubiquinone/menaquinone biosynthesis methyltransferase [Candidatus Accumulibacter sp. BA-93]
-1	Complex II	EXI89591	EXI89592.1	SDHA	PF00890.22	FAD binding domain	Fumarate reductase flavoprotein subunit [Candidatus Accumulibacter sp. BA-93]
-2	Complex II	EXI89591	EXI89593.1	SDHB	PF13085.4	2Fe-2S iron-sulfur cluster binding domain	Fumarate reductase iron-sulfur subunit [Candidatus Accumulibacter sp. BA-93]
-3	Complex II	EXI89591	EXI89594.1	SDHC	PF02300.15	Fumarate reductase subunit C	Fumarate reductase 15 kDa hydrophobic protein [Candidatus Accumulibacter sp. BA-93]
-4	Complex II	EXI89591	EXI89595.1	SDHD	PF02313.15	Fumarate reductase subunit D	Fumarate reductase 13 kDa hydrophobic protein [Candidatus Accumulibacter sp. BA-93]
-5	Complex II	EXI89591	EXI89596.1		PF07317.10	Flagellar regulator YcgR	Cyclic di-GMP binding protein YcgR [Candidatus Accumulibacter sp. BA-93]
-6	Complex II	EXI89591	EXI89597.1		PF01312.17	FlhB HrpN YscU SpaS Family	Flagellar biosynthetic protein FlhB [Candidatus Accumulibacter sp. BA-93]
-7	Complex II	EXI89591	EXI89598.1		PF02120.14	Flagellar hook-length control protein FliK	Flagellar hook-length control protein FliK [Candidatus Accumulibacter sp. BA-93]
-8	Complex II	EXI89591	EXI89375.1		PF00579.23	tRNA synthetases class I (W and Y)	Tyrosine--tRNA ligase [Candidatus Accumulibacter sp. BA-93]
-9	Complex II	EXI89591	EXI89376.1		PF01551.20	Peptidase family M23	Murein hydrolase activator NlpD precursor [Candidatus Accumulibacter sp. BA-93]
-10	Complex II	EXI89591	EXI89377.1		PF00037.25	4Fe-4S binding domain	Ferredoxin [Candidatus Accumulibacter sp. BA-93]
-11	Complex II	EXI89591	EXI89378.1		PF01467.24	Cytidylyltransferase-like	Phosphopantetheine adenylyltransferase [Candidatus Accumulibacter sp. BA-93]
-12	Complex II	EXI89591	EXI89379.1		PF03602.13	Conserved hypothetical protein 95	Ribosomal RNA small subunit methyltransferase D [Candidatus Accumulibacter sp. BA-93]
-13	Complex II	EXI89591	EXI89380.1		PF05193.19	Peptidase M16 inactive domain	Peptidase M16 inactive domain protein [Candidatus Accumulibacter sp. BA-93]
-14	Complex II	EXI89591	EXI89381.1		PF00675.18	Insulinase (Peptidase family M16)	protease3 [Candidatus Accumulibacter sp. BA-93]
-15	Complex II	EXI89591	EXI89382.1		PF00448.20	SRP54-type protein, GTPase domain	Signal recognition particle receptor FtsY [Candidatus Accumulibacter sp. BA-93]
-14	Complex II	WP_088284080	WP_088284058.1		PF00072.22@Response_reg@Response regulator receiver domain;		response regulator [Ideonella sp. A 288]
-13	Complex II	WP_088284080	WP_088284060.1		PF00072.22@Response_reg@Response regulator receiver domain;		response regulator [Ideonella sp. A 288]
-12	Complex II	WP_088284080	WP_088284062.1		PF08447.10@PAS_3@PAS fold;PF00989.23@PAS@PAS fold;PF13426.5@PAS_9@PAS domain;PF08448.8@PAS_4@PAS fold;PF13188.5@PAS_8@PAS domain;PF02518.24@HATPase_c@Histidine kinase-, DNA gyrase B-, and HSP90-like ATPase;PF00512.23@HisKA@His Kinase A (phospho-acceptor) domain;PF00672.23@HAMP@HAMP domain;		hypothetical protein [Ideonella sp. A 288]
-11	Complex II	WP_088284080	WP_088284064.1		PF17200.2@sCache_2@Single Cache domain 2;PF08269.9@dCache_2@Cache domain;PF17201.2@Cache_3-Cache_2@Cache 3/Cache 2 fusion domain;		hypothetical protein [Ideonella sp. A 288]
-10	Complex II	WP_088284080	WP_088284066.1		PF00015.19@MCPsignal@Methyl-accepting chemotaxis protein (MCP) signalling domain;PF00672.23@HAMP@HAMP domain;		methyl-accepting chemotaxis protein [Ideonella sp. A 288]
-9	Complex II	WP_088284080	WP_088284068.1		PF07726.9@AAA_3@ATPase family associated with various cellular activities (AAA);PF07728.12@AAA_5@AAA domain (dynein-related subfamily);		MoxR family ATPase [Ideonella sp. A 288]
-8	Complex II	WP_088284080	WP_088284070.1		No Hit;		MxaS protein [Ideonella sp. A 288]
-7	Complex II	WP_088284080	WP_088284138.1		No Hit;		calcium incorporation protein MxaA [Ideonella sp. A 288]
-6	Complex II	WP_088284080	WP_088284140.1		PF13519.4@VWA_2@von Willebrand factor type A domain;		VWA domain-containing protein [Ideonella sp. A 288]
-5	Complex II	WP_088284080	WP_088284072.1		No Hit;		MxaK protein [Ideonella sp. A 288]
-4	Complex II	WP_088284080	WP_088284142.1		No Hit;		VWA domain-containing protein [Ideonella sp. A 288]
-3	Complex II	WP_088284080	WP_088284074.1		PF00149.26@Metallophos@Calcineurin-like phosphoesterase;		DNA repair exonuclease [Ideonella sp. A 288]
-2	Complex II	WP_088284080	WP_088284076.1		PF13476.4@AAA_23@AAA domain;PF13514.4@AAA_27@AAA domain;		GTP-binding protein [Ideonella sp. A 288]
-1	Complex II	WP_088284080	WP_088284078.1		No Hit;		hypothetical protein [Ideonella sp. A 288]
0	Complex II	WP_088284080	WP_088284080.1	RQUA	PF08241.10@Methyltransf_11@Methyltransferase domain;PF13649.4@Methyltransf_25@Methyltransferase domain;PF01209.16@Ubie_methyltran@ubiE/COQ5 methyltransferase family;PF08242.10@Methyltransf_12@Methyltransferase domain;		class I SAM-dependent methyltransferase [Ideonella sp. A 288]
1	Complex II	WP_088284080	WP_088284144.1	SDHA/FRDA	PF00890.22@FAD_binding_2@FAD binding domain;PF02910.18@Succ_DH_flav_C@Fumarate reductase flavoprotein C-term;PF07992.12@Pyr_redox_2@Pyridine nucleotide-disulphide oxidoreductase;PF01946.15@Thi4@Thi4 family;		fumarate reductase (quinol) flavoprotein subunit [Ideonella sp. A 288]
2	Complex II	WP_088284080	WP_088284082.1	SDHB/FRDB	PF13085.4@Fer2_3@2Fe-2S iron-sulfur cluster binding domain;PF13183.4@Fer4_8@4Fe-4S dicluster domain;PF13237.4@Fer4_10@4Fe-4S dicluster domain;PF13534.4@Fer4_17@4Fe-4S dicluster domain;PF13187.4@Fer4_9@4Fe-4S dicluster domain;PF12838.5@Fer4_7@4Fe-4S dicluster domain;		succinate dehydrogenase/fumarate reductase iron-sulfur subunit [Ideonella sp. A 288]
3	Complex II	WP_088284080	WP_088284084.1	SDHC/FRDC	PF02300.15@Fumarate_red_C@Fumarate reductase subunit C;		fumarate reductase subunit C [Ideonella sp. A 288]
4	Complex II	WP_088284080	WP_088284086.1	SDHD/FRDD	PF02313.15@Fumarate_red_D@Fumarate reductase subunit D;		fumarate reductase subunit FrdD [Ideonella sp. A 288]
5	Complex II	WP_088284080	WP_088284088.1		PF14235.4@DUF4337@Domain of unknown function (DUF4337);		DUF4337 domain-containing protein [Ideonella sp. A 288]
6	Complex II	WP_088284080	WP_088284090.1		PF00186.17@DHFR_1@Dihydrofolate reductase;		dihydrofolate reductase [Ideonella sp. A 288]
7	Complex II	WP_088284080	WP_088284092.1		PF00303.17@Thymidylat_synt@Thymidylate synthase;		thymidylate synthase [Ideonella sp. A 288]
8	Complex II	WP_088284080	WP_088284093.1		PF00664.21@ABC_membrane@ABC transporter transmembrane region;PF00005.25@ABC_tran@ABC transporter;PF02463.17@SMC_N@RecF/RecN/SMC N terminal domain;		ABC transporter [Ideonella sp. A 288]
9	Complex II	WP_088284080	WP_088284095.1		PF13336.4@AcetylCoA_hyd_C@Acetyl-CoA hydrolase/transferase C-terminal domain;		acetyl-CoA hydrolase [Ideonella sp. A 288]
10	Complex II	WP_088284080	WP_088284097.1		PF00990.19@GGDEF@Diguanylate cyclase, GGDEF domain;		GGDEF domain-containing protein [Ideonella sp. A 288]
11	Complex II	WP_088284080	WP_088284099.1		PF07143.9@CrtC@CrtC N-terminal lipocalin domain;PF17186.2@Lipocalin_9@Lipocalin-like domain;		carotenoid 1,2-hydratase [Ideonella sp. A 288]
12	Complex II	WP_088284080	WP_088284101.1		PF02687.19@FtsX@FtsX-like permease family;PF12704.5@MacB_PCD@MacB-like periplasmic core domain;		ABC transporter permease [Ideonella sp. A 288]
13	Complex II	WP_088284080	WP_088284103.1		PF00753.25@Lactamase_B@Metallo-beta-lactamase superfamily;		MBL fold metallo-hydrolase [Ideonella sp. A 288]
14	Complex II	WP_088284080	WP_088284146.1		PF00005.25@ABC_tran@ABC transporter;PF13304.4@AAA_21@AAA domain, putative AbiEii toxin, Type IV TA system;		ABC transporter ATP-binding protein [Ideonella sp. A 288]
15	Complex II	WP_088284080	WP_088284105.1		PF01715.15@IPPT@IPP transferase;		tRNA (adenosine(37)-N6)-dimethylallyltransferase MiaA [Ideonella sp. A 288]
COMPLEX II & CYTOCHROMES
-14	Complex II & Cytochrome	WP_009548819	WP_083839905.1		PF02867.13@Ribonuc_red_lgC@Ribonucleotide reductase, barrel domain;PF14528.4@LAGLIDADG_3@LAGLIDADG-like domain;PF14890.4@Intein_splicing@Intein splicing domain;		ribonucleoside-diphosphate reductase, adenosylcobalamin-dependent [Burkholderiales bacterium JOSHI_001]
-13	Complex II & Cytochrome	WP_009548819	WP_009548806.1		PF05593.12@RHS_repeat@RHS Repeat;PF10908.6@DUF2778@Protein of unknown function (DUF2778);		RHS repeat-associated core domain protein [Burkholderiales bacterium JOSHI_001]
-12	Complex II & Cytochrome	WP_009548819	WP_009548807.1		PF07080.9@DUF1348@Protein of unknown function (DUF1348);PF12680.5@SnoaL_2@SnoaL-like domain;		DUF1348 domain-containing protein [Burkholderiales bacterium JOSHI_001]
-11	Complex II & Cytochrome	WP_009548819	WP_009548808.1		PF02560.12@Cyanate_lyase@Cyanate lyase C-terminal domain;		cyanase [Burkholderiales bacterium JOSHI_001]
-10	Complex II & Cytochrome	WP_009548819	WP_009548809.1		PF00005.25@ABC_tran@ABC transporter;		nitrate/sulfonate/bicarbonate ABC transporter ATP-binding protein [Burkholderiales bacterium JOSHI_001]
-9	Complex II & Cytochrome	WP_009548819	WP_009548810.1		PF00528.20@BPD_transp_1@Binding-protein-dependent transport system inner membrane component;		nitrate ABC transporter, permease protein [Burkholderiales bacterium JOSHI_001]
-8	Complex II & Cytochrome	WP_009548819	WP_009548811.1		PF13379.4@NMT1_2@NMT1-like family;PF09084.9@NMT1@NMT1/THI5 like;		nitrate ABC transporter substrate-binding protein [Burkholderiales bacterium JOSHI_001]
-7	Complex II & Cytochrome	WP_009548819	WP_009548812.1		PF00072.22@Response_reg@Response regulator receiver domain;PF00196.17@GerE@Bacterial regulatory proteins, luxR family;		DNA-binding response regulator [Burkholderiales bacterium JOSHI_001]
-6	Complex II & Cytochrome	WP_009548819	WP_009548813.1		PF00989.23@PAS@PAS fold;PF07730.11@HisKA_3@Histidine kinase;PF13426.5@PAS_9@PAS domain;PF08448.8@PAS_4@PAS fold;PF13188.5@PAS_8@PAS domain;PF02518.24@HATPase_c@Histidine kinase-, DNA gyrase B-, and HSP90-like ATPase;PF12860.5@PAS_7@PAS fold;		histidine kinase [Burkholderiales bacterium JOSHI_001]
-5	Complex II & Cytochrome	WP_009548819	WP_009548814.1	Cytochrome c	PF00034.19@Cytochrom_C@Cytochrome c;		cytochrome c [Burkholderiales bacterium JOSHI_001]
-4	Complex II & Cytochrome	WP_009548819	WP_009548815.1	Cytochrome c	PF14522.4@Cytochrome_C7@Cytochrome c7 and related cytochrome c;PF14537.4@Cytochrom_c3_2@Cytochrome c3;		cytochrome c [Burkholderiales bacterium JOSHI_001]
-3	Complex II & Cytochrome	WP_009548819	WP_009548816.1	Cytochrome c	PF14522.4@Cytochrome_C7@Cytochrome c7 and related cytochrome c;PF14537.4@Cytochrom_c3_2@Cytochrome c3;PF09699.8@Paired_CXXCH_1@Doubled CXXCH motif (Paired_CXXCH_1);PF02085.14@Cytochrom_CIII@Class III cytochrome C family;		cytochrome c [Burkholderiales bacterium JOSHI_001]
-2	Complex II & Cytochrome	WP_009548819	WP_009548817.1	Cytochrome c	PF09699.8@Paired_CXXCH_1@Doubled CXXCH motif (Paired_CXXCH_1);PF14537.4@Cytochrom_c3_2@Cytochrome c3;PF14522.4@Cytochrome_C7@Cytochrome c7 and related cytochrome c;		cytochrome c [Burkholderiales bacterium JOSHI_001]
-1	Complex II & Cytochrome	WP_009548819	WP_009548818.1		PF11854.6@MtrB_PioB@Putative outer membrane beta-barrel porin, MtrB/PioB;		decaheme-associated outer membrane protein, MtrB/PioB family [Burkholderiales bacterium JOSHI_001]
0	Complex II & Cytochrome	WP_009548819	WP_009548819.1	RQUA	PF13649.4@Methyltransf_25@Methyltransferase domain;PF08241.10@Methyltransf_11@Methyltransferase domain;PF01209.16@Ubie_methyltran@ubiE/COQ5 methyltransferase family;		class I SAM-dependent methyltransferase [Burkholderiales bacterium JOSHI_001]
1	Complex II & Cytochrome	WP_009548819	WP_009548820.1	SDHA/FRDA	PF00890.22@FAD_binding_2@FAD binding domain;PF02910.18@Succ_DH_flav_C@Fumarate reductase flavoprotein C-term;PF07992.12@Pyr_redox_2@Pyridine nucleotide-disulphide oxidoreductase;PF01946.15@Thi4@Thi4 family;		fumarate reductase (quinol) flavoprotein subunit [Burkholderiales bacterium JOSHI_001]
2	Complex II & Cytochrome	WP_009548819	WP_009548821.1	SDHB/FRDB	PF13085.4@Fer2_3@2Fe-2S iron-sulfur cluster binding domain;PF13183.4@Fer4_8@4Fe-4S dicluster domain;PF13237.4@Fer4_10@4Fe-4S dicluster domain;		succinate dehydrogenase/fumarate reductase iron-sulfur subunit [Burkholderiales bacterium JOSHI_001]
3	Complex II & Cytochrome	WP_009548819	WP_009548822.1	SDHC/FRDC	PF02300.15@Fumarate_red_C@Fumarate reductase subunit C;		fumarate reductase subunit C [Burkholderiales bacterium JOSHI_001]
4	Complex II & Cytochrome	WP_009548819	WP_009548823.1	SDHD/FRDD	PF02313.15@Fumarate_red_D@Fumarate reductase subunit D;		fumarate reductase subunit D [Burkholderiales bacterium JOSHI_001]
5	Complex II & Cytochrome	WP_009548819	WP_050978781.1		No Hit;		hypothetical protein [Burkholderiales bacterium JOSHI_001]
6	Complex II & Cytochrome	WP_009548819	WP_009548825.1		PF13539.4@Peptidase_M15_4@D-alanyl-D-alanine carboxypeptidase;PF01471.16@PG_binding_1@Putative peptidoglycan binding domain;		peptidoglycan-binding protein [Burkholderiales bacterium JOSHI_001]
7	Complex II & Cytochrome	WP_009548819	WP_009548826.1		PF13561.4@adh_short_C2@Enoyl-(Acyl carrier protein) reductase;PF00106.23@adh_short@short chain dehydrogenase;PF08659.8@KR@KR domain;		NAD(P)-dependent oxidoreductase [Burkholderiales bacterium JOSHI_001]
8	Complex II & Cytochrome	WP_009548819	WP_009548827.1		PF00563.18@EAL@EAL domain;PF00990.19@GGDEF@Diguanylate cyclase, GGDEF domain;PF14827.4@dCache_3@Double sensory domain of two-component sensor kinase;PF00672.23@HAMP@HAMP domain;		GGDEF domain-containing protein [Burkholderiales bacterium JOSHI_001]
9	Complex II & Cytochrome	WP_009548819	WP_009548828.1		PF13620.4@CarboxypepD_reg@Carboxypeptidase regulatory-like domain;		methylamine utilization protein [Burkholderiales bacterium JOSHI_001]
10	Complex II & Cytochrome	WP_009548819	WP_009548829.1		PF14339.4@DUF4394@Domain of unknown function (DUF4394);		DUF4394 domain-containing protein [Burkholderiales bacterium JOSHI_001]
11	Complex II & Cytochrome	WP_009548819	WP_009548830.1		PF01476.18@LysM@LysM domain;		transglycosylase family protein,LysM domain-containing protein [Burkholderiales bacterium JOSHI_001]
12	Complex II & Cytochrome	WP_009548819	WP_009548831.1		No Hit;		hypothetical protein [Burkholderiales bacterium JOSHI_001]
13	Complex II & Cytochrome	WP_009548819	WP_009548832.1		PF03054.14@tRNA_Me_trans@tRNA methyl transferase;PF02540.15@NAD_synthase@NAD synthase;		tRNA 2-thiouridine(34) synthase MnmA [Burkholderiales bacterium JOSHI_001]
14	Complex II & Cytochrome	WP_009548819	WP_009548833.1		PF00293.26@NUDIX@NUDIX domain;		NUDIX hydrolase [Burkholderiales bacterium JOSHI_001]
15	Complex II & Cytochrome	WP_009548819	WP_043285742.1		PF01262.19@AlaDh_PNT_C@Alanine dehydrogenase/PNT, C-terminal domain;PF05222.13@AlaDh_PNT_N@Alanine dehydrogenase/PNT, N-terminal domain;PF12769.5@PNTB_4TM@4TM region of pyridine nucleotide transhydrogenase, mitoch;		NAD(P)() transhydrogenase (Re/Si-specific) subunit alpha [Burkholderiales bacterium JOSHI_001]
COMPLEX II & FeFe HYDROGENASE
-14	Complex II & FeFe Hydrogenase	WP_088861197	WP_027824157.1		PF02649.12@GCHY-1@Type I GTP cyclohydrolase folE2;		GTP cyclohydrolase I FolE2 [Laribacter hongkongensis]
-13	Complex II & FeFe Hydrogenase	WP_088861197	WP_088861188.1	FeFe hydrogenase maturase	PF01926.21@MMR_HSR1@50S ribosome-binding GTPase;		[FeFe] hydrogenase H-cluster maturation GTPase HydF [Laribacter hongkongensis]
-12	Complex II & FeFe Hydrogenase	WP_088861197	WP_088861189.1	FeFe hydrogenase maturase	PF06968.11@BATS@Biotin and Thiamin Synthesis associated domain;		[FeFe] hydrogenase H-cluster radical SAM maturase HydG [Laribacter hongkongensis]
-11	Complex II & FeFe Hydrogenase	WP_088861197	WP_088861190.1	FeFe hydrogenase	PF02906.12@Fe_hyd_lg_C@Iron only hydrogenase large subunit, C-terminal domain;PF02256.15@Fe_hyd_SSU@Iron hydrogenase small subunit;PF10588.7@NADH-G_4Fe-4S_3@NADH-ubiquinone oxidoreductase-G iron-sulfur binding region;PF13510.4@Fer2_4@2Fe-2S iron-sulfur cluster binding domain;PF00037.25@Fer4@4Fe-4S binding domain;PF14697.4@Fer4_21@4Fe-4S dicluster domain;PF12838.5@Fer4_7@4Fe-4S dicluster domain;PF…		(2Fe-2S)-binding protein [Laribacter hongkongensis]
-10	Complex II & FeFe Hydrogenase	WP_088861197	WP_088861981.1		PF07992.12@Pyr_redox_2@Pyridine nucleotide-disulphide oxidoreductase;PF14691.4@Fer4_20@Dihydroprymidine dehydrogenase domain II, 4Fe-4S cluster;PF10589.7@NADH_4Fe-4S@NADH-ubiquinone oxidoreductase-F iron-sulfur binding region;PF13738.4@Pyr_redox_3@Pyridine nucleotide-disulphide oxidoreductase;PF00070.25@Pyr_redox@Pyridine nucleotide-disulphide oxidoreductase;PF13450.4@NAD_binding_8@NAD(P)-binding…		oxidoreductase [Laribacter hongkongensis]
-9	Complex II & FeFe Hydrogenase	WP_088861197	WP_088861191.1		PF04055.19@Radical_SAM@Radical SAM superfamily;		[FeFe] hydrogenase H-cluster radical SAM maturase HydE [Laribacter hongkongensis]
-8	Complex II & FeFe Hydrogenase	WP_088861197	WP_088861192.1		PF16743.3@PliI@Periplasmic lysozyme inhibitor of I-type lysozyme;		hypothetical protein [Laribacter hongkongensis]
-7	Complex II & FeFe Hydrogenase	WP_088861197	WP_088861193.1		PF10688.7@Imp-YgjV@Bacterial inner membrane protein;		YgjV family protein [Laribacter hongkongensis]
-6	Complex II & FeFe Hydrogenase	WP_088861197	WP_088861194.1		PF08497.8@Radical_SAM_N@Radical SAM N-terminal;PF11842.6@DUF3362@Domain of unknown function (DUF3362);PF04055.19@Radical_SAM@Radical SAM superfamily;		YgiQ family radical SAM protein [Laribacter hongkongensis]
-5	Complex II & FeFe Hydrogenase	WP_088861197	WP_012697805.1		PF00696.26@AA_kinase@Amino acid kinase family;		acetylglutamate kinase [Laribacter hongkongensis]
-4	Complex II & FeFe Hydrogenase	WP_088861197	WP_088861982.1		PF00696.26@AA_kinase@Amino acid kinase family;PF00583.23@Acetyltransf_1@Acetyltransferase (GNAT) family;PF13508.5@Acetyltransf_7@Acetyltransferase (GNAT) domain;PF13673.5@Acetyltransf_10@Acetyltransferase (GNAT) domain;		amino-acid N-acetyltransferase [Laribacter hongkongensis]
-3	Complex II & FeFe Hydrogenase	WP_088861197	WP_088861195.1	SDHC/FRDC	PF01127.20@Sdh_cyt@Succinate dehydrogenase/Fumarate reductase transmembrane subunit;		succinate dehydrogenase/fumarate reductase cytochrome b subunit [Laribacter hongkongensis]
-2	Complex II & FeFe Hydrogenase	WP_088861197	WP_088861196.1	SDHB/FRDB	PF00890.22@FAD_binding_2@FAD binding domain;PF02910.18@Succ_DH_flav_C@Fumarate reductase flavoprotein C-term;		fumarate reductase flavoprotein subunit [Laribacter hongkongensis]
-1	Complex II & FeFe Hydrogenase	WP_088861197	WP_012697810.1	SDHA/FRDA	PF13085.4@Fer2_3@2Fe-2S iron-sulfur cluster binding domain;PF13183.4@Fer4_8@4Fe-4S dicluster domain;		succinate dehydrogenase/fumarate reductase iron-sulfur subunit [Laribacter hongkongensis]
0	Complex II & FeFe Hydrogenase	WP_088861197	WP_088861197.1	RQUA	No Hit;		class I SAM-dependent methyltransferase [Laribacter hongkongensis]
1	Complex II & FeFe Hydrogenase	WP_088861197	WP_088861198.1		PF13624.4@SurA_N_3@SurA N-terminal domain;PF13616.4@Rotamase_3@PPIC-type PPIASE domain;PF00639.19@Rotamase@PPIC-type PPIASE domain;PF13145.4@Rotamase_2@PPIC-type PPIASE domain;PF13623.4@SurA_N_2@SurA N-terminal domain;PF09312.9@SurA_N@SurA N-terminal domain;		peptidylprolyl isomerase [Laribacter hongkongensis]
2	Complex II & FeFe Hydrogenase	WP_088861197	WP_012697813.1		PF00216.19@Bac_DNA_binding@Bacterial DNA-binding protein;		HU family DNA-binding protein [Laribacter hongkongensis]
3	Complex II & FeFe Hydrogenase	WP_088861197	WP_088861199.1		PF05362.11@Lon_C@Lon protease (S16) C-terminal proteolytic domain;PF02190.14@LON_substr_bdg@ATP-dependent protease La (LON) substrate-binding domain;PF00004.27@AAA@ATPase family associated with various cellular activities (AAA);PF07728.12@AAA_5@AAA domain (dynein-related subfamily);PF13541.4@ChlI@Subunit ChlI of Mg-chelatase;		endopeptidase La [Laribacter hongkongensis]
4	Complex II & FeFe Hydrogenase	WP_088861197	WP_088861200.1		PF01709.18@Transcrip_reg@Transcriptional regulator;		YebC/PmpR family DNA-binding transcriptional regulator [Laribacter hongkongensis]
5	Complex II & FeFe Hydrogenase	WP_088861197	WP_012697816.1		PF01311.18@Bac_export_1@Bacterial export proteins, family 1;		flagellar biosynthetic protein FliR [Laribacter hongkongensis]
6	Complex II & FeFe Hydrogenase	WP_088861197	WP_012697817.1		PF01313.17@Bac_export_3@Bacterial export proteins, family 3;		flagellar biosynthetic protein FliQ [Laribacter hongkongensis]
7	Complex II & FeFe Hydrogenase	WP_088861197	WP_088861201.1		PF13673.5@Acetyltransf_10@Acetyltransferase (GNAT) domain;PF00583.23@Acetyltransf_1@Acetyltransferase (GNAT) family;		GNAT family N-acetyltransferase [Laribacter hongkongensis]
8	Complex II & FeFe Hydrogenase	WP_088861197	WP_012697819.1		PF00813.18@FliP@FliP family;		flagellar biosynthetic protein FliP [Laribacter hongkongensis]
9	Complex II & FeFe Hydrogenase	WP_088861197	WP_088861983.1		PF04347.11@FliO@Flagellar biosynthesis protein, FliO;		flagellar biosynthetic protein FliO [Laribacter hongkongensis]
10	Complex II & FeFe Hydrogenase	WP_088861197	WP_088861202.1		PF01052.18@FliMN_C@Type III flagellar switch regulator (C-ring) FliN C-term;		flagellar motor switch protein FliN [Laribacter hongkongensis]
11	Complex II & FeFe Hydrogenase	WP_088861197	WP_012697822.1		PF02154.13@FliM@Flagellar motor switch protein FliM;PF01052.18@FliMN_C@Type III flagellar switch regulator (C-ring) FliN C-term;		flagellar motor switch protein FliM [Laribacter hongkongensis]
12	Complex II & FeFe Hydrogenase	WP_088861197	WP_012697823.1		PF03748.12@FliL@Flagellar basal body-associated protein FliL;		hypothetical protein [Laribacter hongkongensis]
13	Complex II & FeFe Hydrogenase	WP_088861197	WP_088861203.1		PF02120.14@Flg_hook@Flagellar hook-length control protein FliK;		flagellar hook-length control protein FliK [Laribacter hongkongensis]
14	Complex II & FeFe Hydrogenase	WP_088861197	WP_081433632.1		PF02050.14@FliJ@Flagellar FliJ protein;		flagellar export protein FliJ [Laribacter hongkongensis]
15	Complex II & FeFe Hydrogenase	WP_088861197	WP_088861204.1		PF00006.23@ATP-synt_ab@ATP synthase alpha/beta family, nucleotide-binding domain;		flagellar protein export ATPase FliI [Laribacter hongkongensis]
CYTOCHROME OXIDASE
-14	COX	OGB20782	OGB20769.1		PF00176.21@SNF2_N@SNF2 family N-terminal domain;PF00271.29@Helicase_C@Helicase conserved C-terminal domain;		helicase [Burkholderiales bacterium RIFCSPLOWO2_02_FULL_57_36]
-13	COX	OGB20782	OGB20933.1		PF01557.16@FAA_hydrolase@Fumarylacetoacetate (FAA) hydrolase family;		hypothetical protein A3I66_19320 [Burkholderiales bacterium RIFCSPLOWO2_02_FULL_57_36]
-12	COX	OGB20782	OGB20770.1		PF11066.6@DUF2867@Protein of unknown function (DUF2867);		hypothetical protein A3I66_19325 [Burkholderiales bacterium RIFCSPLOWO2_02_FULL_57_36]
-11	COX	OGB20782	OGB20771.1		PF03061.20@4HBT@Thioesterase superfamily;		aromatic compound catabolic protein [Burkholderiales bacterium RIFCSPLOWO2_02_FULL_57_36]
-10	COX	OGB20782	OGB20772.1		PF12802.5@MarR_2@MarR family;PF01047.20@MarR@MarR family;		MarR family transcriptional regulator [Burkholderiales bacterium RIFCSPLOWO2_02_FULL_57_36]
-9	COX	OGB20782	OGB20773.1		PF07690.14@MFS_1@Major Facilitator Superfamily;		MFS transporter [Burkholderiales bacterium RIFCSPLOWO2_02_FULL_57_36]
-8	COX	OGB20782	OGB20774.1		PF01554.16@MatE@MatE;		MATE family efflux transporter [Burkholderiales bacterium RIFCSPLOWO2_02_FULL_57_36]
-7	COX	OGB20782	OGB20775.1		PF08837.9@DUF1810@Protein of unknown function (DUF1810);		calpastatin [Burkholderiales bacterium RIFCSPLOWO2_02_FULL_57_36]
-6	COX	OGB20782	OGB20776.1		No Hit;		hypothetical protein A3I66_19355 [Burkholderiales bacterium RIFCSPLOWO2_02_FULL_57_36]
-5	COX	OGB20782	OGB20777.1		PF00012.18@HSP70@Hsp70 protein;PF06723.11@MreB_Mbl@MreB/Mbl protein;		heat-shock protein [Burkholderiales bacterium RIFCSPLOWO2_02_FULL_57_36]
-4	COX	OGB20782	OGB20778.1		PF00990.19@GGDEF@Diguanylate cyclase, GGDEF domain;		diguanylate cyclase [Burkholderiales bacterium RIFCSPLOWO2_02_FULL_57_36]
-3	COX	OGB20782	OGB20779.1		No Hit;		hypothetical protein A3I66_19375 [Burkholderiales bacterium RIFCSPLOWO2_02_FULL_57_36]
-2	COX	OGB20782	OGB20780.1		PF13511.4@DUF4124@Domain of unknown function (DUF4124);		hypothetical protein A3I66_19380 [Burkholderiales bacterium RIFCSPLOWO2_02_FULL_57_36]
-1	COX	OGB20782	OGB20781.1		No Hit;		hypothetical protein A3I66_19385 [Burkholderiales bacterium RIFCSPLOWO2_02_FULL_57_36]
0	COX	OGB20782	OGB20782.1	RQUA	PF13649.4@Methyltransf_25@Methyltransferase domain;PF08241.10@Methyltransf_11@Methyltransferase domain;PF01209.16@Ubie_methyltran@ubiE/COQ5 methyltransferase family;PF13847.4@Methyltransf_31@Methyltransferase domain;		hypothetical protein A3I66_19390 [Burkholderiales bacterium RIFCSPLOWO2_02_FULL_57_36]
1	COX	OGB20782	OGB20934.1		PF00158.24@Sigma54_activat@Sigma-54 interaction domain;PF14532.4@Sigma54_activ_2@Sigma-54 interaction domain;PF00072.22@Response_reg@Response regulator receiver domain;PF02954.17@HTH_8@Bacterial regulatory protein, Fis family;PF07728.12@AAA_5@AAA domain (dynein-related subfamily);		transcriptional regulator [Burkholderiales bacterium RIFCSPLOWO2_02_FULL_57_36]
2	COX	OGB20782	OGB20783.1		PF02518.24@HATPase_c@Histidine kinase-, DNA gyrase B-, and HSP90-like ATPase;PF00512.23@HisKA@His Kinase A (phospho-acceptor) domain;PF00672.23@HAMP@HAMP domain;		hypothetical protein A3I66_19400 [Burkholderiales bacterium RIFCSPLOWO2_02_FULL_57_36]
3	COX	OGB20782	OGB20935.1		PF12974.5@Phosphonate-bd@ABC transporter, phosphonate, periplasmic substrate-binding protein;		ABC transporter substrate-binding protein [Burkholderiales bacterium RIFCSPLOWO2_02_FULL_57_36]
4	COX	OGB20782	OGB20784.1		No Hit;		hypothetical protein A3I66_19410 [Burkholderiales bacterium RIFCSPLOWO2_02_FULL_57_36]
5	COX	OGB20782	OGB20785.1		PF00384.20@Molybdopterin@Molybdopterin oxidoreductase;PF01568.19@Molydop_binding@Molydopterin dinucleotide binding domain;PF04879.14@Molybdop_Fe4S4@Molybdopterin oxidoreductase Fe4S4 domain;		dehydrogenase [Burkholderiales bacterium RIFCSPLOWO2_02_FULL_57_36]
6	COX	OGB20782	OGB20786.1	FeS cluster protein	PF13247.4@Fer4_11@4Fe-4S dicluster domain;PF13237.4@Fer4_10@4Fe-4S dicluster domain;PF12838.5@Fer4_7@4Fe-4S dicluster domain;PF13187.4@Fer4_9@4Fe-4S dicluster domain;PF00037.25@Fer4@4Fe-4S binding domain;PF12797.5@Fer4_2@4Fe-4S binding domain;PF12837.5@Fer4_6@4Fe-4S binding domain;PF13183.4@Fer4_8@4Fe-4S dicluster domain;		hypothetical protein A3I66_19420 [Burkholderiales bacterium RIFCSPLOWO2_02_FULL_57_36]
7	COX	OGB20782	OGB20787.1	Nitrate reductase	PF02613.13@Nitrate_red_del@Nitrate reductase delta subunit;		hypothetical protein A3I66_19425 [Burkholderiales bacterium RIFCSPLOWO2_02_FULL_57_36]
8	COX	OGB20782	OGB20788.1		PF06463.11@Mob_synth_C@Molybdenum Cofactor Synthesis C;PF04055.19@Radical_SAM@Radical SAM superfamily;PF13353.4@Fer4_12@4Fe-4S single cluster domain;		cyclic pyranopterin phosphate synthase MoaA [Burkholderiales bacterium RIFCSPLOWO2_02_FULL_57_36]
9	COX	OGB20782	OGB20789.1	Oxygen-independent heme biosynthesis	PF04055.19@Radical_SAM@Radical SAM superfamily;PF06969.14@HemN_C@HemN C-terminal domain;		oxygen-independent coproporphyrinogen III oxidase [Burkholderiales bacterium RIFCSPLOWO2_02_FULL_57_36]
10	COX	OGB20782	OGB20790.1	Cytochrome c biosynthesis	PF13386.4@DsbD_2@Cytochrome C biogenesis protein transmembrane region;		cytochrome biogenesis protein [Burkholderiales bacterium RIFCSPLOWO2_02_FULL_57_36]
11	COX	OGB20782	OGB20936.1		PF00122.18@E1-E2_ATPase@E1-E2 ATPase;PF00702.24@Hydrolase@haloacid dehalogenase-like hydrolase;PF12156.6@ATPase-cat_bd@Putative metal-binding domain of cation transport ATPase;PF00403.24@HMA@Heavy-metal-associated domain;PF08282.10@Hydrolase_3@haloacid dehalogenase-like hydrolase;		copper-translocating P-type ATPase [Burkholderiales bacterium RIFCSPLOWO2_02_FULL_57_36]
12	COX	OGB20782	OGB20791.1		PF01243.18@Pyridox_oxidase@Pyridoxamine 5'-phosphate oxidase;PF10590.7@PNPOx_C@Pyridoxine 5'-phosphate oxidase C-terminal dimerisation region;PF12766.5@Pyridox_oxase_2@Pyridoxamine 5'-phosphate oxidase;		pyridoxamine 5'-phosphate oxidase [Burkholderiales bacterium RIFCSPLOWO2_02_FULL_57_36]
13	COX	OGB20782	OGB20792.1	cbb3 cytochrome oxidase	PF00115.18@COX1@Cytochrome C and Quinol oxidase polypeptide I;		cytochrome-c oxidase, cbb3-type subunit I [Burkholderiales bacterium RIFCSPLOWO2_02_FULL_57_36]
14	COX	OGB20782	OGB20793.1	cbb3 cytochrome oxidase	PF02433.13@FixO@Cytochrome C oxidase, mono-heme subunit/FixO;		cytochrome-c oxidase, cbb3-type subunit II [Burkholderiales bacterium RIFCSPLOWO2_02_FULL_57_36]
15	COX	OGB20782	OGB20937.1	cbb3 cytochrome oxidase	PF05545.9@FixQ@Cbb3-type cytochrome oxidase component FixQ;		cytochrome-c oxidase [Burkholderiales bacterium RIFCSPLOWO2_02_FULL_57_36]
-15	COX	WP_018748074	WP_018748058.1		PF00155.19@Aminotran_1_2@Aminotransferase class I and II;PF01041.15@DegT_DnrJ_EryC1@DegT/DnrJ/EryC1/StrS aminotransferase family;		8-amino-7-oxononanoate synthase [Chitiniphilus shinanonensis]
-14	COX	WP_018748074	WP_018748059.1		PF05437.10@AzlD@Branched-chain amino acid transport protein (AzlD);		hypothetical protein [Chitiniphilus shinanonensis]
-13	COX	WP_018748074	WP_018748060.1		PF03591.12@AzlC@AzlC protein;		branched-chain amino acid ABC transporter permease [Chitiniphilus shinanonensis]
-12	COX	WP_018748074	WP_018748061.1		PF04345.11@Chor_lyase@Chorismate lyase;		chorismate lyase [Chitiniphilus shinanonensis]
-11	COX	WP_018748074	WP_018748062.1		PF01040.16@UbiA@UbiA prenyltransferase family;		4-hydroxybenzoate octaprenyltransferase [Chitiniphilus shinanonensis]
-10	COX	WP_018748074	WP_018748063.1		PF00015.19@MCPsignal@Methyl-accepting chemotaxis protein (MCP) signalling domain;PF00672.23@HAMP@HAMP domain;		methyl-accepting chemotaxis protein [Chitiniphilus shinanonensis]
-9	COX	WP_018748074	WP_018748064.1		No Hit;		hypothetical protein [Chitiniphilus shinanonensis]
-8	COX	WP_018748074	WP_018748065.1		PF02492.17@cobW@CobW/HypB/UreG, nucleotide-binding domain;PF07683.12@CobW_C@Cobalamin synthesis protein cobW C-terminal domain;		GTP-binding protein [Chitiniphilus shinanonensis]
-7	COX	WP_018748074	WP_018748066.1		PF00593.22@TonB_dep_Rec@TonB dependent receptor;PF07715.13@Plug@TonB-dependent Receptor Plug Domain;		TonB-dependent receptor [Chitiniphilus shinanonensis]
-6	COX	WP_018748074	WP_018748067.1	cbb3 cytochrome oxidase	PF13442.4@Cytochrome_CBB3@Cytochrome C oxidase, cbb3-type, subunit III;PF00034.19@Cytochrom_C@Cytochrome c;		cytochrome c5 family protein [Chitiniphilus shinanonensis]
-5	COX	WP_018748074	WP_018748068.1		PF00583.23@Acetyltransf_1@Acetyltransferase (GNAT) family;PF13508.5@Acetyltransf_7@Acetyltransferase (GNAT) domain;PF08445.8@FR47@FR47-like protein;		GNAT family N-acetyltransferase [Chitiniphilus shinanonensis]
-4	COX	WP_018748074	WP_018748069.1		PF00893.17@Multi_Drug_Res@Small Multidrug Resistance protein;		QacE family quaternary ammonium compound efflux SMR transporter [Chitiniphilus shinanonensis]
-3	COX	WP_018748074	WP_018748070.1		PF01738.16@DLH@Dienelactone hydrolase family;PF00561.18@Abhydrolase_1@alpha/beta hydrolase fold;		hypothetical protein [Chitiniphilus shinanonensis]
-2	COX	WP_018748074	WP_018748071.1		PF00106.23@adh_short@short chain dehydrogenase;PF13561.4@adh_short_C2@Enoyl-(Acyl carrier protein) reductase;		SDR family oxidoreductase [Chitiniphilus shinanonensis]
-1	COX	WP_018748074	WP_018748072.1		PF00724.18@Oxidored_FMN@NADH:flavin oxidoreductase / NADH oxidase family;		NADH:flavin oxidoreductase/NADH oxidase [Chitiniphilus shinanonensis]
0	COX	WP_018748074	WP_018748074.1	RQUA	No Hit;		class I SAM-dependent methyltransferase [Chitiniphilus shinanonensis]
1	COX	WP_018748074	WP_018748075.1		PF13098.4@Thioredoxin_2@Thioredoxin-like domain;PF10411.7@DsbC_N@Disulfide bond isomerase protein N-terminus;PF01323.18@DSBA@DSBA-like thioredoxin domain;		hypothetical protein [Chitiniphilus shinanonensis]
2	COX	WP_018748074	WP_018748076.1		PF01494.17@FAD_binding_3@FAD binding domain;		hypothetical protein [Chitiniphilus shinanonensis]
3	COX	WP_018748074	WP_018748077.1		PF03772.14@Competence@Competence protein;PF13567.4@DUF4131@Domain of unknown function (DUF4131);PF00753.25@Lactamase_B@Metallo-beta-lactamase superfamily;		DNA internalization-related competence protein ComEC/Rec2 [Chitiniphilus shinanonensis]
4	COX	WP_018748074	WP_026262970.1		PF00005.25@ABC_tran@ABC transporter;PF12848.5@ABC_tran_Xtn@ABC transporter;PF13304.4@AAA_21@AAA domain, putative AbiEii toxin, Type IV TA system;PF13555.4@AAA_29@P-loop containing region of AAA domain;PF03193.14@DUF258@Protein of unknown function, DUF258;		ABC-F family ATPase [Chitiniphilus shinanonensis]
5	COX	WP_018748074	WP_018748079.1		PF00155.19@Aminotran_1_2@Aminotransferase class I and II;		hypothetical protein [Chitiniphilus shinanonensis]
6	COX	WP_018748074	WP_018748080.1		No Hit;		hypothetical protein [Chitiniphilus shinanonensis]
7	COX	WP_018748074	WP_083930541.1		PF12698.5@ABC2_membrane_3@ABC-2 family transporter protein;PF01061.22@ABC2_membrane@ABC-2 type transporter;		ABC transporter permease [Chitiniphilus shinanonensis]
8	COX	WP_018748074	WP_083930536.1		PF12698.5@ABC2_membrane_3@ABC-2 family transporter protein;		ABC transporter permease [Chitiniphilus shinanonensis]
9	COX	WP_018748074	WP_051083227.1		PF16576.3@HlyD_D23@Barrel-sandwich domain of CusB or HlyD membrane-fusion;PF13533.4@Biotin_lipoyl_2@Biotin-lipoyl like;PF13437.4@HlyD_3@HlyD family secretion protein;PF00364.20@Biotin_lipoyl@Biotin-requiring enzyme;		hemolysin secretion protein D [Chitiniphilus shinanonensis]
10	COX	WP_018748074	WP_083930537.1		PF02321.16@OEP@Outer membrane efflux protein;		TolC family protein [Chitiniphilus shinanonensis]
11	COX	WP_018748074	WP_018748086.1		PF01063.17@Aminotran_4@Amino-transferase class IV;		aminodeoxychorismate lyase [Chitiniphilus shinanonensis]
12	COX	WP_018748074	WP_018748087.1		PF00425.16@Chorismate_bind@chorismate binding enzyme;PF04715.11@Anth_synt_I_N@Anthranilate synthase component I, N terminal region;		hypothetical protein [Chitiniphilus shinanonensis]
13	COX	WP_018748074	WP_018748088.1		PF13416.4@SBP_bac_8@Bacterial extracellular solute-binding protein;PF01547.23@SBP_bac_1@Bacterial extracellular solute-binding protein;		sugar ABC transporter substrate-binding protein [Chitiniphilus shinanonensis]
14	COX	WP_018748074	WP_018748089.1		No Hit;		hypothetical protein [Chitiniphilus shinanonensis]
15	COX	WP_018748074	WP_018748090.1		PF06824.9@DUF1237@Protein of unknown function (DUF1237);		metal-independent alpha-mannosidase [Chitiniphilus shinanonensis]
-15	COX	WP_048409440	WP_082150974.1		PF08448.8@PAS_4@PAS fold;PF00989.23@PAS@PAS fold;PF13426.5@PAS_9@PAS domain;PF00072.22@Response_reg@Response regulator receiver domain;PF08447.10@PAS_3@PAS fold;PF02518.24@HATPase_c@Histidine kinase-, DNA gyrase B-, and HSP90-like ATPase;PF00512.23@HisKA@His Kinase A (phospho-acceptor) domain;PF13188.5@PAS_8@PAS domain;PF01627.21@Hpt@Hpt domain;		hypothetical protein [Chromobacterium sp. LK1]
-14	COX	WP_048409440	WP_048409431.1		PF00507.17@Oxidored_q4@NADH-ubiquinone/plastoquinone oxidoreductase, chain 3;		NADH-quinone oxidoreductase subunit A [Chromobacterium sp. LK1]
-13	COX	WP_048409440	WP_048409432.1		PF16732.3@ComP_DUS@Type IV minor pilin ComP, DNA uptake sequence receptor;PF07963.10@N_methyl@Prokaryotic N-terminal methylation motif;		prepilin-type cleavage/methylation domain-containing protein [Chromobacterium sp. LK1]
-12	COX	WP_048409440	WP_053074337.1		PF05567.9@Neisseria_PilC@Neisseria PilC beta-propeller domain;		hypothetical protein [Chromobacterium sp. LK1]
-11	COX	WP_048409440	WP_048409433.1		PF14341.4@PilX_N@PilX N-terminal;PF13681.4@PilX@Type IV pilus assembly protein PilX C-term;		hypothetical protein [Chromobacterium sp. LK1]
-10	COX	WP_048409440	WP_082150975.1		PF07963.10@N_methyl@Prokaryotic N-terminal methylation motif;PF16074.3@PilW@Type IV Pilus-assembly protein W;		hypothetical protein [Chromobacterium sp. LK1]
-9	COX	WP_048409440	WP_082150976.1		PF07963.10@N_methyl@Prokaryotic N-terminal methylation motif;		type IV pilus modification protein PilV [Chromobacterium sp. LK1]
-8	COX	WP_048409440	WP_082150977.1		PF12019.6@GspH@Type II transport protein GspH;PF07963.10@N_methyl@Prokaryotic N-terminal methylation motif;		hypothetical protein [Chromobacterium sp. LK1]
-7	COX	WP_048409440	WP_048409436.1		No Hit;		hypothetical protein [Chromobacterium sp. LK1]
-6	COX	WP_048409440	WP_082150978.1		PF10006.7@DUF2249@Uncharacterized conserved protein (DUF2249);		DUF2249 domain-containing protein [Chromobacterium sp. LK1]
-5	COX	WP_048409440	WP_048409437.1		PF01814.21@Hemerythrin@Hemerythrin HHE cation binding domain;		hypothetical protein [Chromobacterium sp. LK1]
-4	COX	WP_048409440	WP_082150979.1	heme metabolism	PF00590.18@TP_methylase@Tetrapyrrole (Corrin/Porphyrin) Methylases;		uroporphyrinogen-III C-methyltransferase [Chromobacterium sp. LK1]
-3	COX	WP_048409440	WP_043590012.1	cbb3 cytochrome oxidase	PF00034.19@Cytochrom_C@Cytochrome c;PF13442.4@Cytochrome_CBB3@Cytochrome C oxidase, cbb3-type, subunit III;		MULTISPECIES: cytochrome c [Chromobacterium]
-2	COX	WP_048409440	WP_048409438.1	cbb3 cytochrome oxidase	PF00115.18@COX1@Cytochrome C and Quinol oxidase polypeptide I;		MULTISPECIES: nitric oxide reductase [Chromobacterium]
-1	COX	WP_048409440	WP_048409439.1	cbb3 cytochrome oxidase	PF00510.16@COX3@Cytochrome c oxidase subunit III;		cytochrome-c oxidase [Chromobacterium sp. LK1]
0	COX	WP_048409440	WP_048409440.1	RQUA	PF13649.4@Methyltransf_25@Methyltransferase domain;PF01209.16@Ubie_methyltran@ubiE/COQ5 methyltransferase family;PF13847.4@Methyltransf_31@Methyltransferase domain;		class I SAM-dependent methyltransferase [Chromobacterium sp. LK1]
1	COX	WP_048409440	WP_048409441.1		No Hit;		hypothetical protein [Chromobacterium sp. LK1]
2	COX	WP_048409440	WP_048409442.1		PF00266.17@Aminotran_5@Aminotransferase class-V;		alanine--glyoxylate aminotransferase family protein [Chromobacterium sp. LK1]
3	COX	WP_048409440	WP_048409443.1		PF00970.22@FAD_binding_6@Oxidoreductase FAD-binding domain;		ferredoxin--NADP reductase [Chromobacterium sp. LK1]
4	COX	WP_048409440	WP_048409444.1		PF13439.4@Glyco_transf_4@Glycosyltransferase Family 4;PF13692.4@Glyco_trans_1_4@Glycosyl transferases group 1;PF00534.18@Glycos_transf_1@Glycosyl transferases group 1;PF13579.4@Glyco_trans_4_4@Glycosyl transferase 4-like domain;		glycosyltransferase family 1 protein [Chromobacterium sp. LK1]
5	COX	WP_048409440	WP_048409445.1		PF12850.5@Metallophos_2@Calcineurin-like phosphoesterase superfamily domain;PF00149.26@Metallophos@Calcineurin-like phosphoesterase;		UDP-2,3-diacylglucosamine diphosphatase [Chromobacterium sp. LK1]
6	COX	WP_048409440	WP_048409446.1		PF00072.22@Response_reg@Response regulator receiver domain;PF00486.26@Trans_reg_C@Transcriptional regulatory protein, C terminal;		DNA-binding response regulator [Chromobacterium sp. LK1]
7	COX	WP_048409440	WP_048409447.1		PF02518.24@HATPase_c@Histidine kinase-, DNA gyrase B-, and HSP90-like ATPase;PF00512.23@HisKA@His Kinase A (phospho-acceptor) domain;PF08521.8@2CSK_N@Two-component sensor kinase N-terminal;PF00672.23@HAMP@HAMP domain;		two-component sensor histidine kinase [Chromobacterium sp. LK1]
8	COX	WP_048409440	WP_048409448.1		No Hit;		hypothetical protein [Chromobacterium sp. LK1]
9	COX	WP_048409440	WP_048409449.1		PF00593.22@TonB_dep_Rec@TonB dependent receptor;PF07715.13@Plug@TonB-dependent Receptor Plug Domain;		TonB-dependent copper receptor [Chromobacterium sp. LK1]
10	COX	WP_048409440	WP_048409673.1		No Hit;		sensor histidine kinase [Chromobacterium sp. LK1]
11	COX	WP_048409440	WP_048409450.1		PF00072.22@Response_reg@Response regulator receiver domain;PF02954.17@HTH_8@Bacterial regulatory protein, Fis family;		chemotaxis protein CheY [Chromobacterium sp. LK1]
12	COX	WP_048409440	WP_082150980.1		PF00501.26@AMP-binding@AMP-binding enzyme;PF13193.4@AMP-binding_C@AMP-binding enzyme C-terminal domain;		long-chain fatty acid--CoA ligase [Chromobacterium sp. LK1]
13	COX	WP_048409440	WP_082151001.1		PF00015.19@MCPsignal@Methyl-accepting chemotaxis protein (MCP) signalling domain;PF02743.16@dCache_1@Cache domain;PF00672.23@HAMP@HAMP domain;PF17201.2@Cache_3-Cache_2@Cache 3/Cache 2 fusion domain;		methyl-accepting chemotaxis protein [Chromobacterium sp. LK1]
14	COX	WP_048409440	WP_048409453.1		PF07824.10@Chaperone_III@Type III secretion chaperone domain;PF05932.11@CesT@Tir chaperone protein (CesT) family;		hypothetical protein [Chromobacterium sp. LK1]
15	COX	WP_048409440	WP_082151002.1		PF05925.10@IpgD@Enterobacterial virulence protein IpgD;		type III secretion system effector inositol phosphate phosphatase [Chromobacterium sp. LK1]
-12	COX	WP_070526861	WP_083301029.1		PF11726.6@Inovirus_Gp2@Inovirus Gp2;		inovirus Gp2 family protein [Jeongeupia sp. USM3]
-11	COX	WP_070526861	WP_070526831.1		PF05930.10@Phage_AlpA@Prophage CP4-57 regulatory protein (AlpA);		AlpA family phage regulatory protein [Jeongeupia sp. USM3]
-10	COX	WP_070526861	WP_083300691.1		PF11726.6@Inovirus_Gp2@Inovirus Gp2;		inovirus Gp2 family protein [Jeongeupia sp. USM3]
-9	COX	WP_070526861	WP_070526839.1	Cytochrome c oxidase	PF13442.4@Cytochrome_CBB3@Cytochrome C oxidase, cbb3-type, subunit III;PF00034.19@Cytochrom_C@Cytochrome c;		cytochrome c5 family protein [Jeongeupia sp. USM3]
-8	COX	WP_070526861	WP_070526841.1		PF00583.23@Acetyltransf_1@Acetyltransferase (GNAT) family;PF13508.5@Acetyltransf_7@Acetyltransferase (GNAT) domain;PF13673.5@Acetyltransf_10@Acetyltransferase (GNAT) domain;		N-acetyltransferase [Jeongeupia sp. USM3]
-7	COX	WP_070526861	WP_070526844.1		PF00893.17@Multi_Drug_Res@Small Multidrug Resistance protein;		QacE family quaternary ammonium compound efflux SMR transporter [Jeongeupia sp. USM3]
-6	COX	WP_070526861	WP_083300692.1		PF01738.16@DLH@Dienelactone hydrolase family;PF08840.9@BAAT_C@BAAT / Acyl-CoA thioester hydrolase C terminal;PF00326.19@Peptidase_S9@Prolyl oligopeptidase family;PF12146.6@Hydrolase_4@Serine aminopeptidase, S33;PF00561.18@Abhydrolase_1@alpha/beta hydrolase fold;PF02129.16@Peptidase_S15@X-Pro dipeptidyl-peptidase (S15 family);		carboxymethylenebutenolidase [Jeongeupia sp. USM3]
-5	COX	WP_070526861	WP_070526846.1		PF01546.26@Peptidase_M20@Peptidase family M20/M25/M40;		aminoacyl-histidine dipeptidase [Jeongeupia sp. USM3]
-4	COX	WP_070526861	WP_070526849.1		PF07063.11@DUF1338@Domain of unknown function (DUF1338);		DUF1338 domain-containing protein [Jeongeupia sp. USM3]
-3	COX	WP_070526861	WP_070526853.1		PF03435.16@Sacchrp_dh_NADP@Saccharopine dehydrogenase NADP binding domain;PF16653.3@Sacchrp_dh_C@Saccharopine dehydrogenase C-terminal domain;PF01488.18@Shikimate_DH@Shikimate / quinate 5-dehydrogenase;PF13460.4@NAD_binding_10@NAD(P)H-binding;PF02737.16@3HCDH_N@3-hydroxyacyl-CoA dehydrogenase, NAD binding domain;PF00899.19@ThiF@ThiF family;		saccharopine dehydrogenase [Jeongeupia sp. USM3]
-2	COX	WP_070526861	WP_083300693.1		PF00171.20@Aldedh@Aldehyde dehydrogenase family;		aldehyde dehydrogenase family protein [Jeongeupia sp. USM3]
-1	COX	WP_070526861	WP_070526858.1		PF00106.23@adh_short@short chain dehydrogenase;PF13561.4@adh_short_C2@Enoyl-(Acyl carrier protein) reductase;PF13460.4@NAD_binding_10@NAD(P)H-binding;		hypothetical protein [Jeongeupia sp. USM3]
0	COX	WP_070526861	WP_070526861.1	RQUA	PF13649.4@Methyltransf_25@Methyltransferase domain;PF13489.4@Methyltransf_23@Methyltransferase domain;		class I SAM-dependent methyltransferase [Jeongeupia sp. USM3]
1	COX	WP_070526861	WP_083300694.1		PF00270.27@DEAD@DEAD/DEAH box helicase;PF00271.29@Helicase_C@Helicase conserved C-terminal domain;PF04851.13@ResIII@Type III restriction enzyme, res subunit;PF13245.4@AAA_19@AAA domain;		RNA helicase [Jeongeupia sp. USM3]
2	COX	WP_070526861	WP_070526867.1		PF08982.9@DUF1857@Domain of unknown function (DUF1857);		DUF1857 domain-containing protein [Jeongeupia sp. USM3]
3	COX	WP_070526861	WP_070526870.1		PF01184.17@Grp1_Fun34_YaaH@GPR1/FUN34/yaaH family;		hypothetical protein [Jeongeupia sp. USM3]
4	COX	WP_070526861	WP_070526871.1		PF00892.18@EamA@EamA-like transporter family;		protein RarD [Jeongeupia sp. USM3]
5	COX	WP_070526861	WP_070526874.1		PF00174.17@Oxidored_molyb@Oxidoreductase molybdopterin binding domain;		hypothetical protein [Jeongeupia sp. USM3]
6	COX	WP_070526861	WP_083300695.1		PF00990.19@GGDEF@Diguanylate cyclase, GGDEF domain;		GGDEF domain-containing protein [Jeongeupia sp. USM3]
7	COX	WP_070526861	WP_070526881.1		PF13344.4@Hydrolase_6@Haloacid dehalogenase-like hydrolase;PF13242.4@Hydrolase_like@HAD-hyrolase-like;PF13419.4@HAD_2@Haloacid dehalogenase-like hydrolase;PF00702.24@Hydrolase@haloacid dehalogenase-like hydrolase;		HAD family hydrolase [Jeongeupia sp. USM3]
8	COX	WP_070526861	WP_083300696.1		PF11911.6@DUF3429@Protein of unknown function (DUF3429);		DUF3429 domain-containing protein [Jeongeupia sp. USM3]
9	COX	WP_070526861	WP_070526886.1		PF14488.4@DUF4434@Domain of unknown function (DUF4434);		DUF4434 domain-containing protein [Jeongeupia sp. USM3]
10	COX	WP_070526861	WP_083300697.1		PF13283.4@NfrA_C@Bacteriophage N adsorption protein A C-term;PF14559.4@TPR_19@Tetratricopeptide repeat;PF13428.4@TPR_14@Tetratricopeptide repeat;PF07719.15@TPR_2@Tetratricopeptide repeat;PF13429.4@TPR_15@Tetratricopeptide repeat;PF13181.4@TPR_8@Tetratricopeptide repeat;		hypothetical protein [Jeongeupia sp. USM3]
11	COX	WP_070526861	WP_070526889.1		PF13632.4@Glyco_trans_2_3@Glycosyl transferase family group 2;PF13641.4@Glyco_tranf_2_3@Glycosyltransferase like family 2;PF05157.13@T2SSE_N@Type II secretion system (T2SS), protein E, N-terminal domain;		type II secretion system protein E [Jeongeupia sp. USM3]
12	COX	WP_070526861	WP_083300698.1		PF02350.17@Epimerase_2@UDP-N-acetylglucosamine 2-epimerase;		UDP-N-acetylglucosamine 2-epimerase (non-hydrolyzing) [Jeongeupia sp. USM3]
13	COX	WP_070526861	WP_070526895.1		No Hit;		hypothetical protein [Jeongeupia sp. USM3]
14	COX	WP_070526861	WP_070526897.1		PF06348.9@DUF1059@Protein of unknown function (DUF1059);		DUF1059 domain-containing protein [Jeongeupia sp. USM3]
15	COX	WP_070526861	WP_070526900.1		No Hit;		hypothetical protein [Jeongeupia sp. USM3]
-15	COX	WP_076022161	WP_076022149.1		PF00582.24@Usp@Universal stress protein family;		universal stress protein [Betaproteobacteria bacterium GR16-43]
-14	COX	WP_076022161	WP_076022150.1		PF13549.4@ATP-grasp_5@ATP-grasp domain;PF13607.4@Succ_CoA_lig@Succinyl-CoA ligase like flavodoxin domain;PF13380.4@CoA_binding_2@CoA binding domain;PF00583.23@Acetyltransf_1@Acetyltransferase (GNAT) family;PF13302.5@Acetyltransf_3@Acetyltransferase (GNAT) domain;PF02629.17@CoA_binding@CoA binding domain;		hypothetical protein [Betaproteobacteria bacterium GR16-43]
-13	COX	WP_076022161	WP_076022151.1		PF00582.24@Usp@Universal stress protein family;		universal stress protein [Betaproteobacteria bacterium GR16-43]
-12	COX	WP_076022161	WP_076022682.1		No Hit;		hypothetical protein [Betaproteobacteria bacterium GR16-43]
-11	COX	WP_076022161	WP_076022152.1		PF05751.9@FixH@FixH;		hypothetical protein [Betaproteobacteria bacterium GR16-43]
-10	COX	WP_076022161	WP_083648487.1	cbb3 cytochrome oxidase	PF13746.4@Fer4_18@4Fe-4S dicluster domain;PF11614.6@FixG_C@IG-like fold at C-terminal of FixG, putative oxidoreductase;PF12801.5@Fer4_5@4Fe-4S binding domain;PF13187.4@Fer4_9@4Fe-4S dicluster domain;PF12838.5@Fer4_7@4Fe-4S dicluster domain;PF13534.4@Fer4_17@4Fe-4S dicluster domain;PF13183.4@Fer4_8@4Fe-4S dicluster domain;		cytochrome c oxidase accessory protein CcoG [Betaproteobacteria bacterium GR16-43]
-9	COX	WP_076022161	WP_076022153.1	cbb3 cytochrome oxidase	PF14715.4@FixP_N@N-terminal domain of cytochrome oxidase-cbb3, FixP;PF13442.4@Cytochrome_CBB3@Cytochrome C oxidase, cbb3-type, subunit III;PF00034.19@Cytochrom_C@Cytochrome c;		cytochrome-c oxidase, cbb3-type subunit III [Betaproteobacteria bacterium GR16-43]
-8	COX	WP_076022161	WP_076022154.1	cbb3 cytochrome oxidase	PF05545.9@FixQ@Cbb3-type cytochrome oxidase component FixQ;		cbb3-type cytochrome c oxidase subunit 3 [Betaproteobacteria bacterium GR16-43]
-7	COX	WP_076022161	WP_076022155.1	cbb3 cytochrome oxidase	PF02433.13@FixO@Cytochrome C oxidase, mono-heme subunit/FixO;		cytochrome-c oxidase, cbb3-type subunit II [Betaproteobacteria bacterium GR16-43]
-6	COX	WP_076022161	WP_076022156.1	cbb3 cytochrome oxidase	PF00115.18@COX1@Cytochrome C and Quinol oxidase polypeptide I;		cytochrome-c oxidase, cbb3-type subunit I [Betaproteobacteria bacterium GR16-43]
-5	COX	WP_076022161	WP_076022157.1		PF00990.19@GGDEF@Diguanylate cyclase, GGDEF domain;		GGDEF domain-containing protein [Betaproteobacteria bacterium GR16-43]
-4	COX	WP_076022161	WP_083648488.1		No Hit;		hypothetical protein [Betaproteobacteria bacterium GR16-43]
-3	COX	WP_076022161	WP_076022158.1		No Hit;		hypothetical protein [Betaproteobacteria bacterium GR16-43]
-2	COX	WP_076022161	WP_076022159.1		PF04143.12@Sulf_transp@Sulphur transport;		hypothetical protein [Betaproteobacteria bacterium GR16-43]
-1	COX	WP_076022161	WP_076022160.1		PF04143.12@Sulf_transp@Sulphur transport;		hypothetical protein [Betaproteobacteria bacterium GR16-43]
0	COX	WP_076022161	WP_076022161.1	RQUA	PF13649.4@Methyltransf_25@Methyltransferase domain;PF01209.16@Ubie_methyltran@ubiE/COQ5 methyltransferase family;PF08241.10@Methyltransf_11@Methyltransferase domain;PF13489.4@Methyltransf_23@Methyltransferase domain;PF08242.10@Methyltransf_12@Methyltransferase domain;		methyltransferase [Betaproteobacteria bacterium GR16-43]
1	COX	WP_076022161	WP_076022162.1		PF00122.18@E1-E2_ATPase@E1-E2 ATPase;PF00702.24@Hydrolase@haloacid dehalogenase-like hydrolase;PF00689.19@Cation_ATPase_C@Cation transporting ATPase, C-terminus;PF00690.24@Cation_ATPase_N@Cation transporter/ATPase, N-terminus;PF12710.5@HAD@haloacid dehalogenase-like hydrolase;		cation-translocating P-type ATPase [Betaproteobacteria bacterium GR16-43]
2	COX	WP_076022161	WP_076022163.1	cbb3 cytochrome oxidase	PF00034.19@Cytochrom_C@Cytochrome c;PF13442.4@Cytochrome_CBB3@Cytochrome C oxidase, cbb3-type, subunit III;		hypothetical protein [Betaproteobacteria bacterium GR16-43]
3	COX	WP_076022161	WP_076022164.1		PF02915.15@Rubrerythrin@Rubrerythrin;		hypothetical protein [Betaproteobacteria bacterium GR16-43]
4	COX	WP_076022161	WP_076022165.1	cbb3 cytochrome oxidase	PF13442.4@Cytochrome_CBB3@Cytochrome C oxidase, cbb3-type, subunit III;		cytochrome c5 family protein [Betaproteobacteria bacterium GR16-43]
5	COX	WP_076022161	WP_076022166.1		No Hit;		hypothetical protein [Betaproteobacteria bacterium GR16-43]
6	COX	WP_076022161	WP_076022167.1		PF03109.14@ABC1@ABC1 family;		hypothetical protein [Betaproteobacteria bacterium GR16-43]
7	COX	WP_076022161	WP_076022168.1		PF02525.15@Flavodoxin_2@Flavodoxin-like fold;PF03358.13@FMN_red@NADPH-dependent FMN reductase;		flavodoxin family protein [Betaproteobacteria bacterium GR16-43]
8	COX	WP_076022161	WP_076022169.1	cbb3 cytochrome oxidase	PF03597.13@FixS@Cytochrome oxidase maturation protein cbb3-type;		cbb3-type cytochrome oxidase assembly protein CcoS [Betaproteobacteria bacterium GR16-43]
9	COX	WP_076022161	WP_076022171.1		PF10996.6@Beta-Casp@Beta-Casp domain;PF07521.10@RMMBL@Zn-dependent metallo-hydrolase RNA specificity domain;PF00753.25@Lactamase_B@Metallo-beta-lactamase superfamily;PF12706.5@Lactamase_B_2@Beta-lactamase superfamily domain;PF16661.3@Lactamase_B_6@Metallo-beta-lactamase superfamily domain;		MBL fold metallo-hydrolase [Betaproteobacteria bacterium GR16-43]
10	COX	WP_076022161	WP_076022172.1		PF00122.18@E1-E2_ATPase@E1-E2 ATPase;PF00702.24@Hydrolase@haloacid dehalogenase-like hydrolase;PF00403.24@HMA@Heavy-metal-associated domain;		heavy metal translocating P-type ATPase [Betaproteobacteria bacterium GR16-43]
11	COX	WP_076022161	WP_083648640.1	cbb3 cytochrome oxidase	PF13442.4@Cytochrome_CBB3@Cytochrome C oxidase, cbb3-type, subunit III;PF00034.19@Cytochrom_C@Cytochrome c;		hypothetical protein [Betaproteobacteria bacterium GR16-43]
12	COX	WP_076022161	WP_076022174.1		PF00069.23@Pkinase@Protein kinase domain;PF07714.15@Pkinase_Tyr@Protein tyrosine kinase;		serine/threonine protein kinase [Betaproteobacteria bacterium GR16-43]
13	COX	WP_076022161	WP_076022175.1		PF07638.9@Sigma70_ECF@ECF sigma factor;PF08281.10@Sigma70_r4_2@Sigma-70, region 4;PF04545.14@Sigma70_r4@Sigma-70, region 4;		hypothetical protein [Betaproteobacteria bacterium GR16-43]
14	COX	WP_076022161	WP_083648489.1		PF00069.23@Pkinase@Protein kinase domain;PF07714.15@Pkinase_Tyr@Protein tyrosine kinase;		serine/threonine protein kinase [Betaproteobacteria bacterium GR16-43]
15	COX	WP_076022161	WP_076022178.1		PF01988.17@VIT1@VIT family;		VIT family protein [Betaproteobacteria bacterium GR16-43]
-14	COX	WP_083782963	WP_011237879.1		PF03668.13@ATP_bind_2@P-loop ATPase protein family;		RNase adaptor protein RapZ [Aromatoleum aromaticum]
-13	COX	WP_083782963	WP_041646170.1		PF07009.9@NusG_II@NusG domain II;		hypothetical protein [Aromatoleum aromaticum]
-12	COX	WP_083782963	WP_011237880.1		PF07456.9@Hpre_diP_synt_I@Heptaprenyl diphosphate synthase component I;		heptaprenyl diphosphate synthase [Aromatoleum aromaticum]
-11	COX	WP_083782963	WP_011237881.1		PF00107.24@ADH_zinc_N@Zinc-binding dehydrogenase;		oxidoreductase [Aromatoleum aromaticum]
-10	COX	WP_083782963	WP_041647143.1		PF02075.15@RuvC@Crossover junction endodeoxyribonuclease RuvC;		crossover junction endodeoxyribonuclease RuvC [Aromatoleum aromaticum]
-9	COX	WP_083782963	WP_041646172.1		No Hit;		hypothetical protein [Aromatoleum aromaticum]
-8	COX	WP_083782963	WP_011237884.1		PF00158.24@Sigma54_activat@Sigma-54 interaction domain;PF14532.4@Sigma54_activ_2@Sigma-54 interaction domain;PF02954.17@HTH_8@Bacterial regulatory protein, Fis family;PF07728.12@AAA_5@AAA domain (dynein-related subfamily);PF13188.5@PAS_8@PAS domain;PF13191.4@AAA_16@AAA ATPase domain;		sigma-54-dependent Fis family transcriptional regulator [Aromatoleum aromaticum]
-7	COX	WP_083782963	WP_011237885.1	cytochrome c oxidase	PF00116.18@COX2@Cytochrome C oxidase subunit II, periplasmic domain;		cytochrome-c oxidase [Aromatoleum aromaticum]
-6	COX	WP_083782963	WP_011237886.1	cytochrome c oxidase	PF00115.18@COX1@Cytochrome C and Quinol oxidase polypeptide I;		cytochrome c oxidase subunit I [Aromatoleum aromaticum]
-5	COX	WP_083782963	WP_011237887.1		PF02630.12@SCO1-SenC@SCO1/SenC;		SCO family protein [Aromatoleum aromaticum]
-4	COX	WP_083782963	WP_011237888.1		No Hit;		hypothetical protein [Aromatoleum aromaticum]
-3	COX	WP_083782963	WP_011237889.1		PF00892.18@EamA@EamA-like transporter family;		EamA/RhaT family transporter [Aromatoleum aromaticum]
-2	COX	WP_083782963	WP_011237890.1		PF01709.18@Transcrip_reg@Transcriptional regulator;		YebC/PmpR family DNA-binding transcriptional regulator [Aromatoleum aromaticum]
-1	COX	WP_083782963	WP_011237891.1		No Hit;		hypothetical protein [Aromatoleum aromaticum]
0	COX	WP_083782963	WP_083782962.1		PF12836.5@HHH_3@Helix-hairpin-helix motif;PF00633.21@HHH@Helix-hairpin-helix motif;PF14520.4@HHH_5@Helix-hairpin-helix domain;PF14579.4@HHH_6@Helix-hairpin-helix motif;PF14716.4@HHH_8@Helix-hairpin-helix domain;PF03934.11@T2SSK@Type II secretion system (T2SS), protein K;		hypothetical protein [Aromatoleum aromaticum]
1	COX	WP_083782963	WP_083782963.1	RQUA	PF13649.4@Methyltransf_25@Methyltransferase domain;PF13489.4@Methyltransf_23@Methyltransferase domain;		class I SAM-dependent methyltransferase [Aromatoleum aromaticum]
2	COX	WP_083782963	WP_011237894.1		PF00270.27@DEAD@DEAD/DEAH box helicase;PF00271.29@Helicase_C@Helicase conserved C-terminal domain;PF13245.4@AAA_19@AAA domain;		RNA helicase [Aromatoleum aromaticum]
3	COX	WP_083782963	WP_011237895.1		PF01435.16@Peptidase_M48@Peptidase family M48;		hypothetical protein [Aromatoleum aromaticum]
4	COX	WP_083782963	WP_011237896.1		PF01497.16@Peripla_BP_2@Periplasmic binding protein;		cobalamin-binding protein [Aromatoleum aromaticum]
5	COX	WP_083782963	WP_011237897.1		PF07685.12@GATase_3@CobB/CobQ-like glutamine amidotransferase domain;PF01656.21@CbiA@CobQ/CobB/MinD/ParA nucleotide binding domain;PF13500.4@AAA_26@AAA domain;		cobyric acid synthase CobQ [Aromatoleum aromaticum]
6	COX	WP_083782963	WP_011237898.1		PF00378.18@ECH_1@Enoyl-CoA hydratase/isomerase;PF16113.3@ECH_2@Enoyl-CoA hydratase/isomerase;		enoyl-CoA hydratase [Aromatoleum aromaticum]
7	COX	WP_083782963	WP_011237900.1		PF13181.4@TPR_8@Tetratricopeptide repeat;PF00515.26@TPR_1@Tetratricopeptide repeat;PF07719.15@TPR_2@Tetratricopeptide repeat;PF13414.4@TPR_11@TPR repeat;PF13432.4@TPR_16@Tetratricopeptide repeat;PF13428.4@TPR_14@Tetratricopeptide repeat;PF13431.4@TPR_17@Tetratricopeptide repeat;PF13424.4@TPR_12@Tetratricopeptide repeat;PF14559.4@TPR_19@Tetratricopeptide repeat;PF13399.4@LytR_C@LytR cell envelope-…		hypothetical protein [Aromatoleum aromaticum]
8	COX	WP_083782963	WP_011237901.1		PF00482.21@T2SSF@Type II secretion system (T2SS), protein F;		type II secretion system protein [Aromatoleum aromaticum]
9	COX	WP_083782963	WP_011237902.1		PF00482.21@T2SSF@Type II secretion system (T2SS), protein F;		Flp pilus assembly protein [Aromatoleum aromaticum]
10	COX	WP_083782963	WP_011237903.1		PF00437.18@T2SSE@Type II/IV secretion system protein;		secretion ATPase type II secretion system protein E [Aromatoleum aromaticum]
11	COX	WP_083782963	WP_011237904.1		PF13614.4@AAA_31@AAA domain;PF01656.21@CbiA@CobQ/CobB/MinD/ParA nucleotide binding domain;PF10609.7@ParA@NUBPL iron-transfer P-loop NTPase;PF06564.10@CBP_BcsQ@Cellulose biosynthesis protein BcsQ;		flp pilus assembly protein, ATPase [Aromatoleum aromaticum]
12	COX	WP_083782963	WP_011237905.1		PF07811.10@TadE@TadE-like protein;		pilus biosynthesis protein TadE [Aromatoleum aromaticum]
13	COX	WP_083782963	WP_049780250.1		PF07811.10@TadE@TadE-like protein;		hypothetical protein [Aromatoleum aromaticum]
14	COX	WP_083782963	WP_011237907.1		PF13400.4@Tad@Putative Flp pilus-assembly TadE/G-like;		hypothetical protein [Aromatoleum aromaticum]
15	COX	WP_083782963	WP_011237908.1		No Hit;		hypothetical protein [Aromatoleum aromaticum]
-15	Cytochrome c oxidase	OYY43933	OYY44006.1		PF00012.18	Hsp70 protein	heat-shock protein [Gallionellales bacterium 35-53-114]
-14	Cytochrome c oxidase	OYY43933	OYY43921.1		No Pfam hit	No Pfam hit	hypothetical protein B7Y56_09880 [Gallionellales bacterium 35-53-114]
-13	Cytochrome c oxidase	OYY43933	OYY43922.1		No Pfam hit	No Pfam hit	hypothetical protein B7Y56_09885 [Gallionellales bacterium 35-53-114]
-12	Cytochrome c oxidase	OYY43933	OYY43923.1		PF00717.21	Peptidase S24-like	LexA family transcriptional repressor [Gallionellales bacterium 35-53-114]
-11	Cytochrome c oxidase	OYY43933	OYY43924.1		PF08323.9	Starch synthase catalytic domain	starch synthase [Gallionellales bacterium 35-53-114]
-10	Cytochrome c oxidase	OYY43933	OYY43925.1		PF00005.25	ABC transporter	ABC transporter ATP-binding protein [Gallionellales bacterium 35-53-114]
-9	Cytochrome c oxidase	OYY43933	OYY44007.1		PF02687.19	FtsX-like permease family	hypothetical protein B7Y56_09905 [Gallionellales bacterium 35-53-114]
-8	Cytochrome c oxidase	OYY43933	OYY43926.1		PF16576.3	Barrel-sandwich domain of CusB or HlyD membrane-fusion	efflux transporter periplasmic adaptor subunit [Gallionellales bacterium 35-53-114]
-7	Cytochrome c oxidase	OYY43933	OYY43927.1		PF00343.18	Carbohydrate phosphorylase	glycogen phosphorylase [Gallionellales bacterium 35-53-114]
-6	Cytochrome c oxidase	OYY43933	OYY43928.1		PF02685.14	Glucokinase	glucokinase [Gallionellales bacterium 35-53-114]
-5	Cytochrome c oxidase	OYY43933	OYY44008.1		PF02781.14	Glucose-6-phosphate dehydrogenase, C-terminal domain	glucose-6-phosphate dehydrogenase [Gallionellales bacterium 35-53-114]
-4	Cytochrome c oxidase	OYY43933	OYY43929.1		PF03446.13	NAD binding domain of 6-phosphogluconate dehydrogenase	6-phosphogluconate dehydrogenase (decarboxylating) [Gallionellales bacterium 35-53-114]
-3	Cytochrome c oxidase	OYY43933	OYY43930.1		PF01182.18	Glucosamine-6-phosphate isomerases/6-phosphogluconolactonase	6-phosphogluconolactonase [Gallionellales bacterium 35-53-114]
-2	Cytochrome c oxidase	OYY43933	OYY43931.1		PF08238.10	Sel1 repeat	hypothetical protein B7Y56_09940 [Gallionellales bacterium 35-53-114]
-1	Cytochrome c oxidase	OYY43933	OYY43932.1		PF01011.19	PQQ enzyme repeat	hypothetical protein B7Y56_09945 [Gallionellales bacterium 35-53-114]
0	Cytochrome c oxidase	OYY43933	OYY43933.1	RQUA	PF13649.4	Methyltransferase domain	methyltransferase [Gallionellales bacterium 35-53-114]
1	Cytochrome c oxidase	OYY43933	OYY43934.1		PF03162.11	Tyrosine phosphatase family	hypothetical protein B7Y56_09955 [Gallionellales bacterium 35-53-114]
2	Cytochrome c oxidase	OYY43933	OYY44009.1		PF11391.6	Protein of unknown function (DUF2798)	hypothetical protein B7Y56_09960 [Gallionellales bacterium 35-53-114]
3	Cytochrome c oxidase	OYY43933	OYY44010.1		PF00657.20	GDSL-like Lipase/Acylhydrolase	hypothetical protein B7Y56_09965 [Gallionellales bacterium 35-53-114]
4	Cytochrome c oxidase	OYY43933	OYY43935.1		PF13855.4	Leucine rich repeat	protein kinase [Gallionellales bacterium 35-53-114]
5	Cytochrome c oxidase	OYY43933	OYY43936.1		PF14340.4	Domain of unknown function (DUF4395)	hypothetical protein B7Y56_09975 [Gallionellales bacterium 35-53-114]
6	Cytochrome c oxidase	OYY43933	OYY43937.1		PF00817.18	impB/mucB/samB family	DNA polymerase V subunit UmuC [Gallionellales bacterium 35-53-114]
7	Cytochrome c oxidase	OYY43933	OYY43938.1		PF00717.21	Peptidase S24-like	hypothetical protein B7Y56_09985 [Gallionellales bacterium 35-53-114]
8	Cytochrome c oxidase	OYY43933	OYY43939.1		No Pfam hit	No Pfam hit	hypothetical protein B7Y56_09990 [Gallionellales bacterium 35-53-114]
9	Cytochrome c oxidase	OYY43933	OYY43940.1		PF01928.19	CYTH domain	adenylate cyclase [Gallionellales bacterium 35-53-114]
10	Cytochrome c oxidase	OYY43933	OYY44011.1		PF08212.10	Lipocalin-like domain	lipocalin [Gallionellales bacterium 35-53-114]
11	Cytochrome c oxidase	OYY43933	OYY43941.1		PF01105.22	emp24/gp25L/p24 family/GOLD	hypothetical protein B7Y56_10005 [Gallionellales bacterium 35-53-114]
12	Cytochrome c oxidase	OYY43933	OYY43942.1	Flavodoxin	PF02525.15	Flavodoxin-like fold	dehydrogenase [Gallionellales bacterium 35-53-114]
13	Cytochrome c oxidase	OYY43933	OYY43943.1		PF14333.4	Domain of unknown function (DUF4389)	lipase [Gallionellales bacterium 35-53-114]
14	Cytochrome c oxidase	OYY43933	OYY43944.1	Cytochrome C oxidase	PF13442.4	Cytochrome C oxidase, cbb3-type, subunit III	hypothetical protein B7Y56_10020 [Gallionellales bacterium 35-53-114]
15	Cytochrome c oxidase	OYY43933	OYY43945.1		PF01494.17	FAD binding domain	geranylgeranyl reductase [Gallionellales bacterium 35-53-114]
CYTOCHROME OXIDASE & HEME METABOLISM
-15	COX & Heme metabolism	WP_051528847	PF02678.14@Pirin@Pirin;PF05726.11@Pirin_C@Pirin C-terminal cupin domain;				pirin family protein [Microvirgula aerodenitrificans]
-14	COX & Heme metabolism	WP_051528847	PF02678.14@Pirin@Pirin;PF05726.11@Pirin_C@Pirin C-terminal cupin domain;				pirin family protein [Microvirgula aerodenitrificans]
-13	COX & Heme metabolism	WP_051528847	PF00199.17@Catalase@Catalase;PF06628.10@Catalase-rel@Catalase-related immune-responsive;				catalase [Microvirgula aerodenitrificans]
-12	COX & Heme metabolism	WP_051528847	PF00892.18@EamA@EamA-like transporter family;				multidrug DMT transporter permease [Microvirgula aerodenitrificans]
-11	COX & Heme metabolism	WP_051528847	No Hit;				hypothetical protein [Microvirgula aerodenitrificans]
-10	COX & Heme metabolism	WP_051528847	PF00590.18@TP_methylase@Tetrapyrrole (Corrin/Porphyrin) Methylases;				uroporphyrinogen-III C-methyltransferase [Microvirgula aerodenitrificans]
-9	COX & Heme metabolism	WP_051528847	PF02239.14@Cytochrom_D1@Cytochrome D1 heme domain;PF13442.4@Cytochrome_CBB3@Cytochrome C oxidase, cbb3-type, subunit III;				cytochrome Cbb3 [Microvirgula aerodenitrificans]
-8	COX & Heme metabolism	WP_051528847	PF04055.19@Radical_SAM@Radical SAM superfamily;PF13353.4@Fer4_12@4Fe-4S single cluster domain;PF13394.4@Fer4_14@4Fe-4S single cluster domain;				heme d1 biosynthesis radical SAM protein NirJ [Microvirgula aerodenitrificans]
-7	COX & Heme metabolism	WP_051528847	PF13404.4@HTH_AsnC-type@AsnC-type helix-turn-helix domain;				Lrp/AsnC family transcriptional regulator [Microvirgula aerodenitrificans]
-6	COX & Heme metabolism	WP_051528847	PF13404.4@HTH_AsnC-type@AsnC-type helix-turn-helix domain;				Lrp/AsnC family transcriptional regulator [Microvirgula aerodenitrificans]
-5	COX & Heme metabolism	WP_051528847	PF13404.4@HTH_AsnC-type@AsnC-type helix-turn-helix domain;				Lrp/AsnC family transcriptional regulator [Microvirgula aerodenitrificans]
-4	COX & Heme metabolism	WP_051528847	PF02239.14@Cytochrom_D1@Cytochrome D1 heme domain;				protein nirF [Microvirgula aerodenitrificans]
-3	COX & Heme metabolism	WP_051528847	PF13442.4@Cytochrome_CBB3@Cytochrome C oxidase, cbb3-type, subunit III;				cytochrome C55X NirC [Microvirgula aerodenitrificans]
-2	COX & Heme metabolism	WP_051528847	PF00034.19@Cytochrom_C@Cytochrome c;				hypothetical protein [Microvirgula aerodenitrificans]
-1	COX & Heme metabolism	WP_051528847	PF02239.14@Cytochrom_D1@Cytochrome D1 heme domain;PF13442.4@Cytochrome_CBB3@Cytochrome C oxidase, cbb3-type, subunit III;				nitrite reductase [Microvirgula aerodenitrificans]
0	COX & Heme metabolism	WP_051528847	PF13649.4@Methyltransf_25@Methyltransferase domain;PF08242.10@Methyltransf_12@Methyltransferase domain;				class I SAM-dependent methyltransferase [Microvirgula aerodenitrificans]
1	COX & Heme metabolism	WP_051528847	PF03466.18@LysR_substrate@LysR substrate binding domain;PF00126.25@HTH_1@Bacterial regulatory helix-turn-helix protein, lysR family;				LysR family transcriptional regulator [Microvirgula aerodenitrificans]
2	COX & Heme metabolism	WP_051528847	PF01177.20@Asp_Glu_race@Asp/Glu/Hydantoin racemase;				aspartate/glutamate racemase family protein [Microvirgula aerodenitrificans]
3	COX & Heme metabolism	WP_051528847	PF00724.18@Oxidored_FMN@NADH:flavin oxidoreductase / NADH oxidase family;				alkene reductase [Microvirgula aerodenitrificans]
4	COX & Heme metabolism	WP_051528847	PF07366.10@SnoaL@SnoaL-like polyketide cyclase;PF12680.5@SnoaL_2@SnoaL-like domain;				ester cyclase [Microvirgula aerodenitrificans]
5	COX & Heme metabolism	WP_051528847	PF00881.22@Nitroreductase@Nitroreductase family;				oxygen-insensitive NAD(P)H-dependent nitroreductase NfsB [Microvirgula aerodenitrificans]
6	COX & Heme metabolism	WP_051528847	PF00015.19@MCPsignal@Methyl-accepting chemotaxis protein (MCP) signalling domain;PF17200.2@sCache_2@Single Cache domain 2;PF08269.9@dCache_2@Cache domain;				methyl-accepting chemotaxis protein [Microvirgula aerodenitrificans]
7	COX & Heme metabolism	WP_051528847	PF03466.18@LysR_substrate@LysR substrate binding domain;PF00126.25@HTH_1@Bacterial regulatory helix-turn-helix protein, lysR family;				LysR family transcriptional regulator [Microvirgula aerodenitrificans]
8	COX & Heme metabolism	WP_051528847	PF00892.18@EamA@EamA-like transporter family;				EamA family transporter [Microvirgula aerodenitrificans]
9	COX & Heme metabolism	WP_051528847	PF01965.22@DJ-1_PfpI@DJ-1/PfpI family;				glutamine amidotransferase [Microvirgula aerodenitrificans]
10	COX & Heme metabolism	WP_051528847	PF00590.18@TP_methylase@Tetrapyrrole (Corrin/Porphyrin) Methylases;				16S rRNA (cytidine(1402)-2'-O)-methyltransferase [Microvirgula aerodenitrificans]
11	COX & Heme metabolism	WP_051528847	PF04348.11@LppC@LppC putative lipoprotein;				hypothetical protein [Microvirgula aerodenitrificans]
12	COX & Heme metabolism	WP_051528847	PF02021.15@UPF0102@Uncharacterised protein family UPF0102;				hypothetical protein [Microvirgula aerodenitrificans]
13	COX & Heme metabolism	WP_051528847	PF13580.4@SIS_2@SIS domain;PF01380.20@SIS@SIS domain;				phosphoheptose isomerase [Microvirgula aerodenitrificans]
14	COX & Heme metabolism	WP_051528847	PF04972.15@BON@BON domain;				BON domain-containing protein [Microvirgula aerodenitrificans]
15	COX & Heme metabolism	WP_051528847	No Hit;				Tim44 domain-containing protein [Microvirgula aerodenitrificans]
-15	COX & Heme metabolism	PKO61098	PKO61122.1		PF04264.11	YceI-like domain	polyisoprenoid-binding protein [Betaproteobacteria bacterium HGW-Betaproteobacteria-18]
-14	COX & Heme metabolism	PKO61098	PKO61125.1		PF01292.18	Prokaryotic cytochrome b561	cytochrome b [Betaproteobacteria bacterium HGW-Betaproteobacteria-18]
-13	COX & Heme metabolism	PKO61098	PKO61126.1		PF02900.16	Catalytic LigB subunit of aromatic ring-opening dioxygenase	dioxygenase [Betaproteobacteria bacterium HGW-Betaproteobacteria-18]
-12	COX & Heme metabolism	PKO61098	PKO61123.1		PF02515.15	CoA-transferase family III	CoA transferase, partial [Betaproteobacteria bacterium HGW-Betaproteobacteria-18]
-11	COX & Heme metabolism	PKO61098	PKO58147.1		PF04519.11	Polymer-forming cytoskeletal	cell shape determination protein CcmA [Betaproteobacteria bacterium HGW-Betaproteobacteria-18]
-10	COX & Heme metabolism	PKO61098	PKO58146.1		PF13401.4	AAA domain	type II secretory pathway protein ExeA, partial [Betaproteobacteria bacterium HGW-Betaproteobacteria-18]
-9	COX & Heme metabolism	PKO61098	PKO58141.1		PF00415.16	Regulator of chromosome condensation (RCC1) repeat	hypothetical protein CVU24_17680, partial [Betaproteobacteria bacterium HGW-Betaproteobacteria-18]
-8	COX & Heme metabolism	PKO61098	PKO58142.1		PF00390.17	Malic enzyme, N-terminal domain	NAD-dependent malic enzyme, partial [Betaproteobacteria bacterium HGW-Betaproteobacteria-18]
-7	COX & Heme metabolism	PKO61098	PKO58138.1		PF12706.5	Beta-lactamase superfamily domain	MBL fold metallo-hydrolase [Betaproteobacteria bacterium HGW-Betaproteobacteria-18]
-6	COX & Heme metabolism	PKO61098	PKO61093.1		No Pfam hit	No Pfam hit	c-type cytochrome biogenesis protein CcmF, partial [Betaproteobacteria bacterium HGW-Betaproteobacteria-18]
-5	COX & Heme metabolism	PKO61098	PKO61094.1		PF03100.13	CcmE	cytochrome c maturation protein CcmE [Betaproteobacteria bacterium HGW-Betaproteobacteria-18]
-4	COX & Heme metabolism	PKO61098	PKO61095.1	heme metabolism	PF04995.12	Heme exporter protein D (CcmD)	heme exporter protein CcmD [Betaproteobacteria bacterium HGW-Betaproteobacteria-18]
-3	COX & Heme metabolism	PKO61098	PKO61096.1	Cytochrome b561	PF01578.18	Cytochrome C assembly protein	heme ABC transporter permease [Betaproteobacteria bacterium HGW-Betaproteobacteria-18]
-2	COX & Heme metabolism	PKO61098	PKO61106.1	heme metabolism	PF03379.11	CcmB protein	heme exporter protein CcmB [Betaproteobacteria bacterium HGW-Betaproteobacteria-18]
-1	COX & Heme metabolism	PKO61098	PKO61097.1	heme metabolism	PF00005.25	ABC transporter	heme ABC transporter ATP-binding protein CcmA [Betaproteobacteria bacterium HGW-Betaproteobacteria-18]
0	COX & Heme metabolism	PKO61098	PKO61098.1	RQUA	PF13649.4	Methyltransferase domain	methyltransferase [Betaproteobacteria bacterium HGW-Betaproteobacteria-18]
1	COX & Heme metabolism	PKO61098	PKO61099.1	Cytochrome c	PF00034.19	Cytochrome c	class I cytochrome c [Betaproteobacteria bacterium HGW-Betaproteobacteria-18]
2	COX & Heme metabolism	PKO61098	PKO61100.1		PF03264.12	NapC/NirT cytochrome c family, N-terminal region	butanol dehydrogenase [Betaproteobacteria bacterium HGW-Betaproteobacteria-18]
3	COX & Heme metabolism	PKO61098	PKO61101.1	Cytochrome c oxidase	PF13442.4	Cytochrome C oxidase, cbb3-type, subunit III	cytochrome C [Betaproteobacteria bacterium HGW-Betaproteobacteria-18]
4	COX & Heme metabolism	PKO61098	PKO61102.1		PF00043.23	Glutathione S-transferase, C-terminal domain	glutathione transferase GstA [Betaproteobacteria bacterium HGW-Betaproteobacteria-18]
5	COX & Heme metabolism	PKO61098	PKO61103.1		PF03358.13	NADPH-dependent FMN reductase	NADPH-dependent FMN reductase [Betaproteobacteria bacterium HGW-Betaproteobacteria-18]
6	COX & Heme metabolism	PKO61098	PKO61104.1		PF00365.18	Phosphofructokinase	6-phosphofructokinase [Betaproteobacteria bacterium HGW-Betaproteobacteria-18]
7	COX & Heme metabolism	PKO61098	PKO61107.1		PF01134.20	Glucose inhibited division protein A	tRNA uridine-5-carboxymethylaminomethyl(34) synthesis enzyme MnmG [Betaproteobacteria bacterium HGW-Betaproteobacteria-18]
8	COX & Heme metabolism	PKO61098	PKO61105.1		PF02527.13	rRNA small subunit methyltransferase G	16S rRNA (guanine(527)-N(7))-methyltransferase RsmG [Betaproteobacteria bacterium HGW-Betaproteobacteria-18]
9	COX & Heme metabolism	PKO61098	PKO58133.1		PF01479.23	S4 domain	hypothetical protein CVU24_17700, partial [Betaproteobacteria bacterium HGW-Betaproteobacteria-18]
10	COX & Heme metabolism	PKO61098	PKO58126.1		PF00171.20	Aldehyde dehydrogenase family	aldehyde dehydrogenase, partial [Betaproteobacteria bacterium HGW-Betaproteobacteria-18]
11	COX & Heme metabolism	PKO61098	PKO58127.1		PF01958.16	Domain of unknown function DUF108	aspartate dehydrogenase [Betaproteobacteria bacterium HGW-Betaproteobacteria-18]
12	COX & Heme metabolism	PKO61098	PKO58128.1		PF02775.19	Thiamine pyrophosphate enzyme, C-terminal TPP binding domain	hypothetical protein CVU24_17715 [Betaproteobacteria bacterium HGW-Betaproteobacteria-18]
13	COX & Heme metabolism	PKO61098	PKO58122.1		PF01814.21	Hemerythrin HHE cation binding domain	hypothetical protein CVU24_17720 [Betaproteobacteria bacterium HGW-Betaproteobacteria-18]
14	COX & Heme metabolism	PKO61098	PKO58123.1		PF01026.19	TatD related DNase	DNAase [Betaproteobacteria bacterium HGW-Betaproteobacteria-18]
CYTOCHROME C
-15	Cytochrome c	WP_066182047	WP_066182011.1		PF09375.8@Peptidase_M75@Imelysin;		hypothetical protein [Hoeflea olei]
-14	Cytochrome c	WP_066182047	WP_066182730.1		PF06537.9@DHOR@Di-haem oxidoreductase, putative peroxidase;PF00034.19@Cytochrom_C@Cytochrome c;		thiol oxidoreductase [Hoeflea olei]
-13	Cytochrome c	WP_066182047	WP_066182014.1		PF00210.22@Ferritin@Ferritin-like domain;PF02915.15@Rubrerythrin@Rubrerythrin;		bacterioferritin [Hoeflea olei]
-12	Cytochrome c	WP_066182047	WP_066182017.1		PF04324.13@Fer2_BFD@BFD-like [2Fe-2S] binding domain;		(2Fe-2S)-binding protein [Hoeflea olei]
-11	Cytochrome c	WP_066182047	WP_066182021.1		PF09375.8@Peptidase_M75@Imelysin;		peptidase [Hoeflea olei]
-10	Cytochrome c	WP_066182047	WP_066182024.1		No Hit;		hypothetical protein [Hoeflea olei]
-9	Cytochrome c	WP_066182047	WP_066182025.1		PF13458.4@Peripla_BP_6@Periplasmic binding protein;PF13433.4@Peripla_BP_5@Periplasmic binding protein domain;PF01094.26@ANF_receptor@Receptor family ligand binding region;		branched-chain amino acid ABC transporter substrate-binding protein [Hoeflea olei]
-8	Cytochrome c	WP_066182047	WP_066182027.1		PF02653.14@BPD_transp_2@Branched-chain amino acid transport system / permease component;		branched-chain amino acid ABC transporter permease [Hoeflea olei]
-7	Cytochrome c	WP_066182047	WP_066182030.1		PF02653.14@BPD_transp_2@Branched-chain amino acid transport system / permease component;		branched-chain amino acid ABC transporter permease [Hoeflea olei]
-6	Cytochrome c	WP_066182047	WP_066182033.1		PF00005.25@ABC_tran@ABC transporter;PF13555.4@AAA_29@P-loop containing region of AAA domain;		ABC transporter ATP-binding protein [Hoeflea olei]
-5	Cytochrome c	WP_066182047	WP_066182037.1		PF00005.25@ABC_tran@ABC transporter;PF13304.4@AAA_21@AAA domain, putative AbiEii toxin, Type IV TA system;		ABC transporter ATP-binding protein [Hoeflea olei]
-4	Cytochrome c	WP_066182047	WP_066182039.1		PF13417.4@GST_N_3@Glutathione S-transferase, N-terminal domain;PF13409.4@GST_N_2@Glutathione S-transferase, N-terminal domain;PF02798.18@GST_N@Glutathione S-transferase, N-terminal domain;		glutathione S-transferase [Hoeflea olei]
-3	Cytochrome c	WP_066182047	WP_066182041.1	Cytochrome b561	PF01292.18@Ni_hydr_CYTB@Prokaryotic cytochrome b561;		hypothetical protein [Hoeflea olei]
-2	Cytochrome c	WP_066182047	WP_066182044.1	Cytochrome c biosynthesis	PF11783.6@Cytochrome_cB@Cytochrome c bacterial;PF14522.4@Cytochrome_C7@Cytochrome c7 and related cytochrome c;PF09699.8@Paired_CXXCH_1@Doubled CXXCH motif (Paired_CXXCH_1);PF14537.4@Cytochrom_c3_2@Cytochrome c3;		hypothetical protein [Hoeflea olei]
-1	Cytochrome c	WP_066182047	WP_066182733.1	Cytochrome c biosynthesis	PF14537.4@Cytochrom_c3_2@Cytochrome c3;PF14522.4@Cytochrome_C7@Cytochrome c7 and related cytochrome c;		hypothetical protein [Hoeflea olei]
0	Cytochrome c	WP_066182047	WP_066182047.1	RQUA	PF13489.4@Methyltransf_23@Methyltransferase domain;PF13649.4@Methyltransf_25@Methyltransferase domain;		hypothetical protein [Hoeflea olei]
1	Cytochrome c	WP_066182047	WP_066182050.1		PF01042.19@Ribonuc_L-PSP@Endoribonuclease L-PSP;		RidA family protein [Hoeflea olei]
2	Cytochrome c	WP_066182047	WP_066182053.1		PF01266.22@DAO@FAD dependent oxidoreductase;PF13450.4@NAD_binding_8@NAD(P)-binding Rossmann-like domain;PF00890.22@FAD_binding_2@FAD binding domain;		FAD-binding oxidoreductase [Hoeflea olei]
3	Cytochrome c	WP_066182047	WP_066182055.1		PF00850.17@Hist_deacetyl@Histone deacetylase domain;		histone deacetylase family protein [Hoeflea olei]
4	Cytochrome c	WP_066182047	WP_066182058.1		PF05853.10@BKACE@beta-keto acid cleavage enzyme;		3-keto-5-aminohexanoate cleavage protein [Hoeflea olei]
5	Cytochrome c	WP_066182047	WP_066182061.1		PF00202.19@Aminotran_3@Aminotransferase class-III;		aspartate aminotransferase family protein [Hoeflea olei]
6	Cytochrome c	WP_066182047	WP_066182063.1		PF00005.25@ABC_tran@ABC transporter;PF08402.8@TOBE_2@TOBE domain;PF13304.4@AAA_21@AAA domain, putative AbiEii toxin, Type IV TA system;		polyamine ABC transporter ATP-binding protein [Hoeflea olei]
7	Cytochrome c	WP_066182047	WP_066182065.1		PF13416.4@SBP_bac_8@Bacterial extracellular solute-binding protein;PF13343.4@SBP_bac_6@Bacterial extracellular solute-binding protein;		spermidine/putrescine ABC transporter substrate-binding protein [Hoeflea olei]
8	Cytochrome c	WP_066182047	WP_066182736.1		PF00528.20@BPD_transp_1@Binding-protein-dependent transport system inner membrane component;		spermidine/putrescine ABC transporter permease [Hoeflea olei]
9	Cytochrome c	WP_066182047	WP_066182068.1		PF00528.20@BPD_transp_1@Binding-protein-dependent transport system inner membrane component;		ABC transporter permease [Hoeflea olei]
10	Cytochrome c	WP_066182047	WP_066182072.1		PF03466.18@LysR_substrate@LysR substrate binding domain;PF00126.25@HTH_1@Bacterial regulatory helix-turn-helix protein, lysR family;		LysR family transcriptional regulator [Hoeflea olei]
11	Cytochrome c	WP_066182047	WP_066182075.1		No Hit;		hypothetical protein [Hoeflea olei]
12	Cytochrome c	WP_066182047	WP_066182078.1		No Hit;		hypothetical protein [Hoeflea olei]
13	Cytochrome c	WP_066182047	WP_066182080.1		No Hit;		hypothetical protein [Hoeflea olei]
14	Cytochrome c	WP_066182047	WP_066182083.1		No Hit;		hypothetical protein [Hoeflea olei]
15	Cytochrome c	WP_066182047	WP_066182086.1		No Hit;		hypothetical protein [Hoeflea olei]
-13	Cytochrome c	WP_081963697	WP_035523742.1		PF02699.13@YajC@Preprotein translocase subunit;		preprotein translocase subunit YajC [Hoeflea sp. BAL378]
-12	Cytochrome c	WP_081963697	WP_035523745.1		PF05673.11@DUF815@Protein of unknown function (DUF815);PF13191.4@AAA_16@AAA ATPase domain;		DUF815 domain-containing protein [Hoeflea sp. BAL378]
-11	Cytochrome c	WP_081963697	WP_035523748.1		PF01551.20@Peptidase_M23@Peptidase family M23;PF01476.18@LysM@LysM domain;		hypothetical protein [Hoeflea sp. BAL378]
-10	Cytochrome c	WP_081963697	WP_035523751.1		PF01135.17@PCMT@Protein-L-isoaspartate(D-aspartate) O-methyltransferase (PCMT);PF13847.4@Methyltransf_31@Methyltransferase domain;PF13649.4@Methyltransf_25@Methyltransferase domain;PF08241.10@Methyltransf_11@Methyltransferase domain;PF05175.12@MTS@Methyltransferase small domain;		protein-L-isoaspartate(D-aspartate) O-methyltransferase [Hoeflea sp. BAL378]
-9	Cytochrome c	WP_081963697	WP_035523786.1		PF01975.15@SurE@Survival protein SurE;		5'/3'-nucleotidase SurE [Hoeflea sp. BAL378]
-8	Cytochrome c	WP_081963697	WP_035523754.1		PF00587.23@tRNA-synt_2b@tRNA synthetase class II core domain (G, H, P, S and T);PF02403.20@Seryl_tRNA_N@Seryl-tRNA synthetase N-terminal domain;		serine--tRNA ligase [Hoeflea sp. BAL378]
-7	Cytochrome c	WP_081963697	WP_035523757.1		PF00902.16@TatC@Sec-independent protein translocase protein (TatC);		twin-arginine translocase subunit TatC [Hoeflea sp. BAL378]
-6	Cytochrome c	WP_081963697	WP_035523760.1		PF02416.14@MttA_Hcf106@mttA/Hcf106 family;		twin-arginine translocase subunit TatB [Hoeflea sp. BAL378]
-5	Cytochrome c	WP_081963697	WP_035523762.1		PF02416.14@MttA_Hcf106@mttA/Hcf106 family;		twin-arginine translocase TatA/TatE family subunit [Hoeflea sp. BAL378]
-4	Cytochrome c	WP_081963697	WP_052161260.1		PF00005.25@ABC_tran@ABC transporter;PF13304.4@AAA_21@AAA domain, putative AbiEii toxin, Type IV TA system;		ABC transporter ATP-binding protein [Hoeflea sp. BAL378]
-3	Cytochrome c	WP_081963697	WP_081963692.1		PF04079.14@SMC_ScpB@Segregation and condensation complex subunit ScpB;		SMC-Scp complex subunit ScpB [Hoeflea sp. BAL378]
-2	Cytochrome c	WP_081963697	WP_035523764.1		PF02616.12@SMC_ScpA@Segregation and condensation protein ScpA;		segregation/condensation protein A [Hoeflea sp. BAL378]
-1	Cytochrome c	WP_081963697	WP_052161264.1	Cytochrome c	PF14522.4@Cytochrome_C7@Cytochrome c7 and related cytochrome c;PF14537.4@Cytochrom_c3_2@Cytochrome c3;		hypothetical protein [Hoeflea sp. BAL378]
0	Cytochrome c	WP_081963697	WP_081963697.1	RQUA	PF13649.4@Methyltransf_25@Methyltransferase domain;		class I SAM-dependent methyltransferase [Hoeflea sp. BAL378]
1	Cytochrome c	WP_081963697	WP_035523802.1		PF03884.12@DUF329@Domain of unknown function (DUF329);		DNA gyrase inhibitor YacG [Hoeflea sp. BAL378]
2	Cytochrome c	WP_081963697	WP_035523804.1		PF02545.12@Maf@Maf-like protein;		Maf-like protein [Hoeflea sp. BAL378]
3	Cytochrome c	WP_081963697	WP_004435948.1		PF01176.17@eIF-1a@Translation initiation factor 1A / IF-1;		MULTISPECIES: translation initiation factor IF-1 [Rhizobiales]
4	Cytochrome c	WP_081963697	WP_052161263.1		PF01451.19@LMWPc@Low molecular weight phosphotyrosine protein phosphatase;		low molecular weight phosphatase family protein [Hoeflea sp. BAL378]
5	Cytochrome c	WP_081963697	WP_035523809.1		PF06793.10@UPF0262@Uncharacterised protein family (UPF0262);		UPF0262 family protein [Hoeflea sp. BAL378]
6	Cytochrome c	WP_081963697	WP_035523813.1		PF00815.18@Histidinol_dh@Histidinol dehydrogenase;		histidinol dehydrogenase [Hoeflea sp. BAL378]
7	Cytochrome c	WP_081963697	WP_035523815.1		PF11164.6@DUF2948@Protein of unknown function (DUF2948);		DUF2948 domain-containing protein [Hoeflea sp. BAL378]
8	Cytochrome c	WP_081963697	WP_035523818.1		PF00275.18@EPSP_synthase@EPSP synthase (3-phosphoshikimate 1-carboxyvinyltransferase);		UDP-N-acetylglucosamine 1-carboxyvinyltransferase [Hoeflea sp. BAL378]
9	Cytochrome c	WP_081963697	WP_035523820.1		No Hit;		hypothetical protein [Hoeflea sp. BAL378]
10	Cytochrome c	WP_081963697	WP_035523822.1		No Hit;		hypothetical protein [Hoeflea sp. BAL378]
11	Cytochrome c	WP_081963697	WP_035523824.1		No Hit;		hypothetical protein [Hoeflea sp. BAL378]
12	Cytochrome c	WP_081963697	WP_081963701.1		PF00474.15@SSF@Sodium:solute symporter family;		cation acetate symporter [Hoeflea sp. BAL378]
13	Cytochrome c	WP_081963697	WP_035523885.1		PF13937.4@DUF4212@Domain of unknown function (DUF4212);		DUF4212 domain-containing protein [Hoeflea sp. BAL378]
14	Cytochrome c	WP_081963697	WP_035523829.1		No Hit;		hypothetical protein [Hoeflea sp. BAL378]
15	Cytochrome c	WP_081963697	WP_035523832.1		PF03445.11@DUF294@Putative nucleotidyltransferase DUF294;PF00929.22@RNase_T@Exonuclease;PF10335.7@DUF294_C@Putative nucleotidyltransferase substrate binding domain;PF00571.26@CBS@CBS domain;		DNA polymerase III subunit epsilon [Hoeflea sp. BAL378]
-15	Cytochrome c	WP_082679741	WP_058718826.1		PF02882.17@THF_DHG_CYH_C@Tetrahydrofolate dehydrogenase/cyclohydrolase, NAD(P)-binding domain;PF00763.21@THF_DHG_CYH@Tetrahydrofolate dehydrogenase/cyclohydrolase, catalytic domain;		bifunctional methylenetetrahydrofolate dehydrogenase/methenyltetrahydrofolate cyclohydrolase FolD [Paucibacter sp. KCTC 42545]
-14	Cytochrome c	WP_082679741	WP_058718827.1		PF00072.22@Response_reg@Response regulator receiver domain;PF00196.17@GerE@Bacterial regulatory proteins, luxR family;		DNA-binding response regulator [Paucibacter sp. KCTC 42545]
-13	Cytochrome c	WP_082679741	WP_082679740.1		PF02518.24@HATPase_c@Histidine kinase-, DNA gyrase B-, and HSP90-like ATPase;PF00989.23@PAS@PAS fold;PF13426.5@PAS_9@PAS domain;PF08448.8@PAS_4@PAS fold;PF00512.23@HisKA@His Kinase A (phospho-acceptor) domain;PF13188.5@PAS_8@PAS domain;		PAS domain-containing sensor histidine kinase [Paucibacter sp. KCTC 42545]
-12	Cytochrome c	WP_082679741	WP_058718828.1	Pyruvate dehydrogenase E1	PF00456.19@Transketolase_N@Transketolase, thiamine diphosphate binding domain;		pyruvate dehydrogenase (acetyl-transferring), homodimeric type [Paucibacter sp. KCTC 42545]
-11	Cytochrome c	WP_082679741	WP_058718829.1	Pyruvate dehydrogenase E2	PF00198.21@2-oxoacid_dh@2-oxoacid dehydrogenases acyltransferase (catalytic domain);PF00364.20@Biotin_lipoyl@Biotin-requiring enzyme;PF02817.15@E3_binding@e3 binding domain;PF01597.17@GCV_H@Glycine cleavage H-protein;		dihydrolipoyllysine-residue acetyltransferase [Paucibacter sp. KCTC 42545]
-10	Cytochrome c	WP_082679741	WP_058718830.1	Pyruvate dehydrogenase E3	PF07992.12@Pyr_redox_2@Pyridine nucleotide-disulphide oxidoreductase;PF02852.20@Pyr_redox_dim@Pyridine nucleotide-disulphide oxidoreductase, dimerisation domain;PF00364.20@Biotin_lipoyl@Biotin-requiring enzyme;PF00070.25@Pyr_redox@Pyridine nucleotide-disulphide oxidoreductase;PF12831.5@FAD_oxidored@FAD dependent oxidoreductase;PF01134.20@GIDA@Glucose inhibited division protein A;		dihydrolipoyl dehydrogenase [Paucibacter sp. KCTC 42545]
-9	Cytochrome c	WP_082679741	WP_058722049.1	Cytochrome c	PF00034.19@Cytochrom_C@Cytochrome c;PF13442.4@Cytochrome_CBB3@Cytochrome C oxidase, cbb3-type, subunit III;		cytochrome C [Paucibacter sp. KCTC 42545]
-8	Cytochrome c	WP_082679741	WP_058718831.1		PF02868.13@Peptidase_M4_C@Thermolysin metallopeptidase, alpha-helical domain;PF01447.16@Peptidase_M4@Thermolysin metallopeptidase, catalytic domain;PF07504.11@FTP@Fungalysin/Thermolysin Propeptide Motif;PF03413.17@PepSY@Peptidase propeptide and YPEB domain;		peptidase M4 family protein [Paucibacter sp. KCTC 42545]
-7	Cytochrome c	WP_082679741	WP_058722050.1		No Hit;		hypothetical protein [Paucibacter sp. KCTC 42545]
-6	Cytochrome c	WP_082679741	WP_058718832.1		No Hit;		hypothetical protein [Paucibacter sp. KCTC 42545]
-5	Cytochrome c	WP_082679741	WP_058718833.1		PF00795.20@CN_hydrolase@Carbon-nitrogen hydrolase;		apolipoprotein N-acyltransferase [Paucibacter sp. KCTC 42545]
-4	Cytochrome c	WP_082679741	WP_058718834.1		No Hit;		hypothetical protein [Paucibacter sp. KCTC 42545]
-3	Cytochrome c	WP_082679741	WP_058718835.1		PF09922.7@DUF2154@Cell wall-active antibiotics response 4TMS YvqF;		hypothetical protein [Paucibacter sp. KCTC 42545]
-2	Cytochrome c	WP_082679741	WP_058718836.1		PF00854.19@PTR2@POT family;PF07690.14@MFS_1@Major Facilitator Superfamily;		MFS transporter [Paucibacter sp. KCTC 42545]
-1	Cytochrome c	WP_082679741	WP_058718837.1		No Hit;		hypothetical protein [Paucibacter sp. KCTC 42545]
0	Cytochrome c	WP_082679741	WP_082679741.1	RQUA	PF13649.4@Methyltransf_25@Methyltransferase domain;PF01209.16@Ubie_methyltran@ubiE/COQ5 methyltransferase family;PF08241.10@Methyltransf_11@Methyltransferase domain;		methyltransferase [Paucibacter sp. KCTC 42545]
1	Cytochrome c	WP_082679741	WP_058718838.1		PF00753.25@Lactamase_B@Metallo-beta-lactamase superfamily;		MBL fold metallo-hydrolase [Paucibacter sp. KCTC 42545]
2	Cytochrome c	WP_082679741	WP_058718839.1		PF00120.22@Gln-synt_C@Glutamine synthetase, catalytic domain;		glutamine synthetase [Paucibacter sp. KCTC 42545]
3	Cytochrome c	WP_082679741	WP_058718840.1		PF08668.10@HDOD@HDOD domain;		HDOD domain-containing protein [Paucibacter sp. KCTC 42545]
4	Cytochrome c	WP_082679741	WP_082679742.1		PF06035.9@Peptidase_C93@Bacterial transglutaminase-like cysteine proteinase BTLCP;		hypothetical protein [Paucibacter sp. KCTC 42545]
5	Cytochrome c	WP_082679741	WP_082679743.1		PF16448.3@LapD_MoxY_N@LapD/MoxY periplasmic domain;PF00563.18@EAL@EAL domain;PF00990.19@GGDEF@Diguanylate cyclase, GGDEF domain;PF00672.23@HAMP@HAMP domain;		hypothetical protein [Paucibacter sp. KCTC 42545]
6	Cytochrome c	WP_082679741	WP_058718842.1		PF14803.4@Nudix_N_2@Nudix N-terminal;PF00293.26@NUDIX@NUDIX domain;		NUDIX hydrolase [Paucibacter sp. KCTC 42545]
7	Cytochrome c	WP_082679741	WP_058718843.1		PF13417.4@GST_N_3@Glutathione S-transferase, N-terminal domain;PF02798.18@GST_N@Glutathione S-transferase, N-terminal domain;PF13409.4@GST_N_2@Glutathione S-transferase, N-terminal domain;PF13410.4@GST_C_2@Glutathione S-transferase, C-terminal domain;		maleylacetoacetate isomerase [Paucibacter sp. KCTC 42545]
8	Cytochrome c	WP_082679741	WP_082680288.1		PF02578.13@Cu-oxidase_4@Multi-copper polyphenol oxidoreductase laccase;		laccase domain-containing protein [Paucibacter sp. KCTC 42545]
9	Cytochrome c	WP_082679741	WP_058718844.1		No Hit;		hypothetical protein [Paucibacter sp. KCTC 42545]
10	Cytochrome c	WP_082679741	WP_082679744.1		PF07167.11@PhaC_N@Poly-beta-hydroxybutyrate polymerase (PhaC) N-terminus;PF00561.18@Abhydrolase_1@alpha/beta hydrolase fold;		class I poly(R)-hydroxyalkanoic acid synthase [Paucibacter sp. KCTC 42545]
11	Cytochrome c	WP_082679741	WP_058718846.1		PF00108.21@Thiolase_N@Thiolase, N-terminal domain;PF02803.16@Thiolase_C@Thiolase, C-terminal domain;PF00109.24@ketoacyl-synt@Beta-ketoacyl synthase, N-terminal domain;		acetyl-CoA C-acetyltransferase [Paucibacter sp. KCTC 42545]
12	Cytochrome c	WP_082679741	WP_058718847.1		PF00106.23@adh_short@short chain dehydrogenase;PF13561.4@adh_short_C2@Enoyl-(Acyl carrier protein) reductase;PF08659.8@KR@KR domain;		beta-ketoacyl-ACP reductase [Paucibacter sp. KCTC 42545]
13	Cytochrome c	WP_082679741	WP_058718848.1		PF02518.24@HATPase_c@Histidine kinase-, DNA gyrase B-, and HSP90-like ATPase;PF13424.4@TPR_12@Tetratricopeptide repeat;PF13185.4@GAF_2@GAF domain;PF13492.4@GAF_3@GAF domain;PF00515.26@TPR_1@Tetratricopeptide repeat;PF13181.4@TPR_8@Tetratricopeptide repeat;PF07719.15@TPR_2@Tetratricopeptide repeat;PF00512.23@HisKA@His Kinase A (phospho-acceptor) domain;		hypothetical protein [Paucibacter sp. KCTC 42545]
14	Cytochrome c	WP_082679741	WP_082679745.1		PF01614.16@IclR@Bacterial transcriptional regulator;PF09339.8@HTH_IclR@IclR helix-turn-helix domain;		IclR family transcriptional regulator [Paucibacter sp. KCTC 42545]
15	Cytochrome c	WP_082679741	WP_058718850.1		PF01987.15@AIM24@Mitochondrial biogenesis AIM24;		TIGR00266 family protein [Paucibacter sp. KCTC 42545]
-15	Cytochrome c	WP_083218417	WP_069005972.1		PF14229.4@DUF4332@Domain of unknown function (DUF4332);PF14520.4@HHH_5@Helix-hairpin-helix domain;PF11731.6@Cdd1@Pathogenicity locus;		DUF4332 domain-containing protein [Candidatus Thiodiazotropha endoloripes]
-14	Cytochrome c	WP_083218417	WP_069005973.1		No Hit;		hypothetical protein [Candidatus Thiodiazotropha endoloripes]
-13	Cytochrome c	WP_083218417	WP_083218415.1		PF02190.14@LON_substr_bdg@ATP-dependent protease La (LON) substrate-binding domain;		hypothetical protein [Candidatus Thiodiazotropha endoloripes]
-12	Cytochrome c	WP_083218417	WP_069005975.1		PF00561.18@Abhydrolase_1@alpha/beta hydrolase fold;PF12697.5@Abhydrolase_6@Alpha/beta hydrolase family;PF12146.6@Hydrolase_4@Serine aminopeptidase, S33;		hydrolase [Candidatus Thiodiazotropha endoloripes]
-11	Cytochrome c	WP_083218417	WP_069005976.1		No Hit;		hypothetical protein [Candidatus Thiodiazotropha endoloripes]
-10	Cytochrome c	WP_083218417	WP_069005977.1		PF02518.24@HATPase_c@Histidine kinase-, DNA gyrase B-, and HSP90-like ATPase;PF00512.23@HisKA@His Kinase A (phospho-acceptor) domain;PF08521.8@2CSK_N@Two-component sensor kinase N-terminal;		hypothetical protein [Candidatus Thiodiazotropha endoloripes]
-9	Cytochrome c	WP_083218417	WP_069005978.1		PF00486.26@Trans_reg_C@Transcriptional regulatory protein, C terminal;PF00072.22@Response_reg@Response regulator receiver domain;		DNA-binding response regulator [Candidatus Thiodiazotropha endoloripes]
-8	Cytochrome c	WP_083218417	WP_083218416.1		PF14559.4@TPR_19@Tetratricopeptide repeat;PF07719.15@TPR_2@Tetratricopeptide repeat;PF13428.4@TPR_14@Tetratricopeptide repeat;		hypothetical protein [Candidatus Thiodiazotropha endoloripes]
-7	Cytochrome c	WP_083218417	WP_069005979.1		PF00076.20@RRM_1@RNA recognition motif. (a.k.a. RRM, RBD, or RNP domain);		RNA-binding protein [Candidatus Thiodiazotropha endoloripes]
-6	Cytochrome c	WP_083218417	WP_069005980.1		PF01261.22@AP_endonuc_2@Xylose isomerase-like TIM barrel;		hypothetical protein [Candidatus Thiodiazotropha endoloripes]
-5	Cytochrome c	WP_083218417	WP_069005981.1		PF01435.16@Peptidase_M48@Peptidase family M48;		protease HtpX [Candidatus Thiodiazotropha endoloripes]
-4	Cytochrome c	WP_083218417	WP_069005982.1		PF01116.18@F_bP_aldolase@Fructose-bisphosphate aldolase class-II;PF07876.10@Dabb@Stress responsive A/B Barrel Domain;		ketose-bisphosphate aldolase [Candidatus Thiodiazotropha endoloripes]
-3	Cytochrome c	WP_083218417	WP_069006092.1		PF03466.18@LysR_substrate@LysR substrate binding domain;PF00126.25@HTH_1@Bacterial regulatory helix-turn-helix protein, lysR family;		LysR family transcriptional regulator [Candidatus Thiodiazotropha endoloripes]
-2	Cytochrome c	WP_083218417	WP_069005983.1		PF01292.18@Ni_hydr_CYTB@Prokaryotic cytochrome b561;		cytochrome B [Candidatus Thiodiazotropha endoloripes]
-1	Cytochrome c	WP_083218417	WP_069005984.1	Cytochrome c	PF11783.6@Cytochrome_cB@Cytochrome c bacterial;PF14522.4@Cytochrome_C7@Cytochrome c7 and related cytochrome c;PF14537.4@Cytochrom_c3_2@Cytochrome c3;		cytochrome C [Candidatus Thiodiazotropha endoloripes]
0	Cytochrome c	WP_083218417	WP_083218417.1	RQUA	PF13649.4@Methyltransf_25@Methyltransferase domain;PF08241.10@Methyltransf_11@Methyltransferase domain;PF01209.16@Ubie_methyltran@ubiE/COQ5 methyltransferase family;PF05401.9@NodS@Nodulation protein S (NodS);PF13847.4@Methyltransf_31@Methyltransferase domain;		class I SAM-dependent methyltransferase [Candidatus Thiodiazotropha endoloripes]
1	Cytochrome c	WP_083218417	WP_068993560.1		PF01027.18@Bax1-I@Inhibitor of apoptosis-promoting Bax1;		BAX inhibitor (BI)-1/YccA family protein [Candidatus Thiodiazotropha endoloripes]
2	Cytochrome c	WP_083218417	WP_069005985.1		No Hit;		hypothetical protein [Candidatus Thiodiazotropha endoloripes]
3	Cytochrome c	WP_083218417	WP_069005986.1		PF02403.20@Seryl_tRNA_N@Seryl-tRNA synthetase N-terminal domain;PF00587.23@tRNA-synt_2b@tRNA synthetase class II core domain (G, H, P, S and T);		serine--tRNA ligase [Candidatus Thiodiazotropha endoloripes]
4	Cytochrome c	WP_083218417	WP_069005987.1		PF02641.13@DUF190@Uncharacterized ACR, COG1993;		hypothetical protein [Candidatus Thiodiazotropha endoloripes]
5	Cytochrome c	WP_083218417	WP_069005988.1		PF02537.13@CRCB@CrcB-like protein, Camphor Resistance (CrcB);		fluoride efflux transporter CrcB [Candidatus Thiodiazotropha endoloripes]
6	Cytochrome c	WP_083218417	WP_069005989.1		No Hit;		hypothetical protein [Candidatus Thiodiazotropha endoloripes]
7	Cytochrome c	WP_083218417	WP_083218418.1	Cytochrome c	PF14522.4@Cytochrome_C7@Cytochrome c7 and related cytochrome c;PF14537.4@Cytochrom_c3_2@Cytochrome c3;PF02085.14@Cytochrom_CIII@Class III cytochrome C family;		hypothetical protein [Candidatus Thiodiazotropha endoloripes]
8	Cytochrome c	WP_083218417	WP_069006094.1	Cytochrome c	PF14522.4@Cytochrome_C7@Cytochrome c7 and related cytochrome c;PF14537.4@Cytochrom_c3_2@Cytochrome c3;PF02085.14@Cytochrom_CIII@Class III cytochrome C family;		cytochrome C [Candidatus Thiodiazotropha endoloripes]
9	Cytochrome c	WP_083218417	WP_069005991.1		No Hit;		hypothetical protein [Candidatus Thiodiazotropha endoloripes]
10	Cytochrome c	WP_083218417	WP_069005992.1		PF13738.4@Pyr_redox_3@Pyridine nucleotide-disulphide oxidoreductase;PF07992.12@Pyr_redox_2@Pyridine nucleotide-disulphide oxidoreductase;PF00037.25@Fer4@4Fe-4S binding domain;PF13237.4@Fer4_10@4Fe-4S dicluster domain;PF12797.5@Fer4_2@4Fe-4S binding domain;PF03486.12@HI0933_like@HI0933-like protein;PF12837.5@Fer4_6@4Fe-4S binding domain;PF14697.4@Fer4_21@4Fe-4S dicluster domain;PF12838.5@Fer4_7@4F…		4Fe-4S ferredoxin [Candidatus Thiodiazotropha endoloripes]
11	Cytochrome c	WP_083218417	WP_083218419.1		PF12796.5@Ank_2@Ankyrin repeats (3 copies);PF13637.4@Ank_4@Ankyrin repeats (many copies);PF13857.4@Ank_5@Ankyrin repeats (many copies);PF00023.28@Ank@Ankyrin repeat;PF13606.4@Ank_3@Ankyrin repeat;PF08238.10@Sel1@Sel1 repeat;		hypothetical protein [Candidatus Thiodiazotropha endoloripes]
12	Cytochrome c	WP_083218417	WP_069005994.1		PF12002.6@MgsA_C@MgsA AAA ATPase C terminal;PF16193.3@AAA_assoc_2@AAA C-terminal domain;PF00004.27@AAA@ATPase family associated with various cellular activities (AAA);PF05496.10@RuvB_N@Holliday junction DNA helicase ruvB N-terminus;PF13191.4@AAA_16@AAA ATPase domain;PF07728.12@AAA_5@AAA domain (dynein-related subfamily);PF01078.19@Mg_chelatase@Magnesium chelatase, subunit ChlI;PF13173.4@AAA_14@AA…		replication-associated recombination protein A [Candidatus Thiodiazotropha endoloripes]
13	Cytochrome c	WP_083218417	WP_069005995.1		PF03548.13@LolA@Outer membrane lipoprotein carrier protein LolA;		outer membrane lipoprotein carrier protein LolA [Candidatus Thiodiazotropha endoloripes]
14	Cytochrome c	WP_083218417	WP_069005996.1		PF01580.16@FtsK_SpoIIIE@FtsK/SpoIIIE family;PF13491.4@FtsK_4TM@4TM region of DNA translocase FtsK/SpoIIIE;PF09397.8@Ftsk_gamma@Ftsk gamma domain;PF12846.5@AAA_10@AAA-like domain;		DNA translocase FtsK [Candidatus Thiodiazotropha endoloripes]
15	Cytochrome c	WP_083218417	WP_069005997.1		PF01262.19@AlaDh_PNT_C@Alanine dehydrogenase/PNT, C-terminal domain;PF05222.13@AlaDh_PNT_N@Alanine dehydrogenase/PNT, N-terminal domain;PF02826.17@2-Hacid_dh_C@D-isomer specific 2-hydroxyacid dehydrogenase, NAD binding domain;		alanine dehydrogenase [Candidatus Thiodiazotropha endoloripes]
							tRNA pseudouridine synthase A [bacterium BMS3Bbin10]
-15	Cytochrome C	GBE44355	GBE44340.1		PF01416.18	tRNA pseudouridine synthase	hypothetical protein BMS3Bbin10_02432 [bacterium BMS3Bbin10]
-14	Cytochrome C	GBE44355	GBE44341.1		No Pfam hit	No Pfam hit	succinyl-diaminopimelate desuccinylase [bacterium BMS3Bbin10]
-13	Cytochrome C	GBE44355	GBE44342.1		PF01546.26	Peptidase family M20/M25/M40	2,3,4,5-tetrahydropyridine-2,6-dicarboxylate N-succinyltransferase [bacterium BMS3Bbin10]
-12	Cytochrome C	GBE44355	GBE44343.1		PF14805.4	Tetrahydrodipicolinate N-succinyltransferase N-terminal	phosphoglycolate phosphatase [bacterium BMS3Bbin10]
-11	Cytochrome C	GBE44355	GBE44344.1		PF13419.4	Haloacid dehalogenase-like hydrolase	acetylglutamate kinase [bacterium BMS3Bbin10]
-10	Cytochrome C	GBE44355	GBE44345.1		PF00696.26	Amino acid kinase family	putative GTP-binding protein EngB [bacterium BMS3Bbin10]
-9	Cytochrome C	GBE44355	GBE44346.1		PF01926.21	50S ribosome-binding GTPase	membrane protein insertase YidC [bacterium BMS3Bbin10]
-8	Cytochrome C	GBE44355	GBE44347.1		PF14849.4	YidC periplasmic domain	ribonuclease P protein component [bacterium BMS3Bbin10]
-7	Cytochrome C	GBE44355	GBE44348.1		PF00825.16	Ribonuclease P	hypothetical protein BMS3Bbin10_02440 [bacterium BMS3Bbin10]
-6	Cytochrome C	GBE44355	GBE44349.1		PF04784.12	Protein of unknown function, DUF547	TVP38/TMEM64 family inner membrane protein YdjZ [bacterium BMS3Bbin10]
-5	Cytochrome C	GBE44355	GBE44350.1		PF09335.9	SNARE associated Golgi protein	mercuric reductase [bacterium BMS3Bbin10]
-4	Cytochrome C	GBE44355	GBE44351.1		PF07992.12	Pyridine nucleotide-disulphide oxidoreductase	sensor histidine kinase CssS [bacterium BMS3Bbin10]
-3	Cytochrome C	GBE44355	GBE44352.1		PF02518.24	Histidine kinase-, DNA gyrase B-, and HSP90-like ATPase	hypothetical protein BMS3Bbin10_02444 [bacterium BMS3Bbin10]
-2	Cytochrome C	GBE44355	GBE44353.1		No Pfam hit	No Pfam hit	hypothetical protein BMS3Bbin10_02446 [bacterium BMS3Bbin10]
-1	Cytochrome C	GBE44355	GBE44354.1		No Pfam hit	No Pfam hit	hypothetical protein BMS3Bbin10_02447 [bacterium BMS3Bbin10]
0	Cytochrome C	GBE44355	GBE44355.1	RQUA	PF13649.4	Methyltransferase domain	hypothetical protein BMS3Bbin10_02448 [bacterium BMS3Bbin10]
1	Cytochrome C	GBE44355	GBE44356.1		PF10410.7	DnaB-helicase binding domain of primase	cyclopropane-fatty-acyl-phospholipid synthase [bacterium BMS3Bbin10]
2	Cytochrome C	GBE44355	GBE44357.1		PF02353.18	Mycolic acid cyclopropane synthetase	hypothetical protein BMS3Bbin10_02450 [bacterium BMS3Bbin10]
3	Cytochrome C	GBE44355	GBE44358.1	Fe oxygenase	PF13640.4	2OG-Fe(II) oxygenase superfamily	hypothetical protein BMS3Bbin10_02451 [bacterium BMS3Bbin10]
4	Cytochrome C	GBE44355	GBE44359.1		No Pfam hit	No Pfam hit	disulfide-bond oxidoreductase YfcG [bacterium BMS3Bbin10]
5	Cytochrome C	GBE44355	GBE44360.1		PF02798.18	Glutathione S-transferase, N-terminal domain	4-hydroxy-tetrahydrodipicolinate synthase [bacterium BMS3Bbin10]
6	Cytochrome C	GBE44355	GBE44361.1		PF00701.20	Dihydrodipicolinate synthetase family	von Willebrand factor [bacterium BMS3Bbin10]
7	Cytochrome C	GBE44355	GBE44362.1		PF12034.6	Domain of unknown function (DUF3520)	ECF RNA polymerase sigma factor SigM [bacterium BMS3Bbin10]
8	Cytochrome C	GBE44355	GBE44363.1		PF04542.12	Sigma-70 region 2	acetolactate synthase isozyme 2 large subunit [bacterium BMS3Bbin10]
9	Cytochrome C	GBE44355	GBE44364.1		PF02776.16	Thiamine pyrophosphate enzyme, N-terminal TPP binding domain	putative peptidoglycan binding domain protein [bacterium BMS3Bbin10]
10	Cytochrome C	GBE44355	GBE44365.1		PF01471.16	Putative peptidoglycan binding domain	cytochrome c-556 [bacterium BMS3Bbin10]
11	Cytochrome C	GBE44355	GBE44366.1	Cytochrome C	PF01322.18	Cytochrome C'	nicotinate dehydrogenase subunit B [bacterium BMS3Bbin10]
12	Cytochrome C	GBE44355	GBE44367.1	Cytochrome C	PF00034.19	Cytochrome c	caspase domain protein [bacterium BMS3Bbin10]
13	Cytochrome C	GBE44355	GBE44368.1		PF14326.4	Domain of unknown function (DUF4384)	hypothetical protein BMS3Bbin10_02461 [bacterium BMS3Bbin10]
14	Cytochrome C	GBE44355	GBE44369.1		PF00656.20	Caspase domain	succinate dehydrogenase/fumarate reductase iron-sulfur subunit [bacterium BMS3Bbin10]
15	Cytochrome C	GBE44355	GBE44370.1	heterodisulfidereductase	PF02754.14	Cysteine-rich domain
15	Cytochrome c	WP_078059222	WP_078059221.1		PF16576.3	Barrel-sandwich domain of CusB or HlyD membrane-fusion	efflux RND transporter periplasmic adaptor subunit [Pseudoruegeria marinistellae]
14	Cytochrome c	WP_078059222	WP_068114680.1		PF00873.17	AcrB/AcrD/AcrF family	hydrophobe/amphiphile efflux-1 family RND transporter [Pseudoruegeria marinistellae]
13	Cytochrome c	WP_078059222	WP_068114682.1		PF07681.10	DoxX	DoxX family protein [Pseudoruegeria marinistellae]
12	Cytochrome c	WP_078059222	WP_068114684.1		PF03466.18	LysR substrate binding domain	LysR family transcriptional regulator [Pseudoruegeria marinistellae]
11	Cytochrome c	WP_078059222	WP_068114686.1		PF02952.15	L-fucose isomerase, C-terminal domain	fucose isomerase [Pseudoruegeria marinistellae]
10	Cytochrome c	WP_078059222	WP_068114688.1		PF05025.11	RbsD / FucU transport protein family	ribose ABC transporter [Pseudoruegeria marinistellae]
9	Cytochrome c	WP_078059222	WP_068114690.1	Cytochrome C	PF00034.19	Cytochrome c	cytochrome c family protein [Pseudoruegeria marinistellae]
8	Cytochrome c	WP_078059222	WP_068114693.1		PF12849.5	PBP superfamily domain	phosphonate ABC transporter substrate-binding protein [Pseudoruegeria marinistellae]
7	Cytochrome c	WP_078059222	WP_068114695.1		PF12501.6	Phosphate ATP-binding cassette transporter	phosphate ABC transporter permease subunit PstC [Pseudoruegeria marinistellae]
6	Cytochrome c	WP_078059222	WP_068114697.1		PF11812.6	Domain of unknown function (DUF3333)	phosphate ABC transporter permease PtsA [Pseudoruegeria marinistellae]
5	Cytochrome c	WP_078059222	WP_068114699.1		PF00005.25	ABC transporter	phosphate ABC transporter ATP-binding protein [Pseudoruegeria marinistellae]
4	Cytochrome c	WP_078059222	WP_068114702.1		PF01895.17	PhoU domain	phosphate transport system regulatory protein PhoU [Pseudoruegeria marinistellae]
3	Cytochrome c	WP_078059222	WP_068114704.1		PF00072.22	Response regulator receiver domain	phosphate regulon transcriptional regulatory protein PhoB [Pseudoruegeria marinistellae]
2	Cytochrome c	WP_078059222	WP_068114705.1		PF00571.26	CBS domain	CBS domain-containing protein [Pseudoruegeria marinistellae]
1	Cytochrome c	WP_078059222	WP_068115169.1		PF03600.14	Citrate transporter	hypothetical protein [Pseudoruegeria marinistellae]
0	Cytochrome c	WP_078059222	WP_078059222.1	RQUA	PF08242.10	Methyltransferase domain	class I SAM-dependent methyltransferase [Pseudoruegeria marinistellae]
-1	Cytochrome c	WP_078059222	WP_078059223.1		PF03472.13	Autoinducer binding domain	hypothetical protein [Pseudoruegeria marinistellae]
-2	Cytochrome c	WP_078059222	WP_068114709.1		PF00889.17	Elongation factor TS	elongation factor Ts [Pseudoruegeria marinistellae]
-3	Cytochrome c	WP_078059222	WP_068114712.1		PF00318.18	Ribosomal protein S2	30S ribosomal protein S2 [Pseudoruegeria marinistellae]
-4	Cytochrome c	WP_078059222	WP_068114713.1		PF07883.9	Cupin domain	cupin domain-containing protein [Pseudoruegeria marinistellae]
-5	Cytochrome c	WP_078059222	WP_068114717.1		PF00294.22	pfkB family carbohydrate kinase	kinase [Pseudoruegeria marinistellae]
-6	Cytochrome c	WP_078059222	WP_068114719.1		PF04227.10	Indigoidine synthase A like protein	pseudouridine-5'-phosphate glycosidase [Pseudoruegeria marinistellae]
-7	Cytochrome c	WP_078059222	WP_078059224.1		PF04367.11	Protein of unknown function (DUF502)	DUF502 domain-containing protein [Pseudoruegeria marinistellae]
-8	Cytochrome c	WP_078059222	WP_068114720.1		PF01734.20	Patatin-like phospholipase	patatin [Pseudoruegeria marinistellae]
-9	Cytochrome c	WP_078059222	WP_068114722.1		PF13561.4	Enoyl-(Acyl carrier protein) reductase	3-hydroxybutyrate dehydrogenase [Pseudoruegeria marinistellae]
-10	Cytochrome c	WP_078059222	WP_068114723.1		PF00496.20	Bacterial extracellular solute-binding proteins, family 5 Middle	ABC transporter substrate-binding protein [Pseudoruegeria marinistellae]
-11	Cytochrome c	WP_078059222	WP_068114725.1		PF01553.19	Acyltransferase	1-acyl-sn-glycerol-3-phosphate acyltransferase [Pseudoruegeria marinistellae]
-12	Cytochrome c	WP_078059222	WP_068114727.1		PF13444.4	Acetyltransferase (GNAT) domain	GNAT family N-acetyltransferase [Pseudoruegeria marinistellae]
-13	Cytochrome c	WP_078059222	WP_068115173.1		PF12073.6	Protein of unknown function (DUF3553)	DUF3553 domain-containing protein [Pseudoruegeria marinistellae]
-14	Cytochrome c	WP_078059222	WP_068114729.1		PF10090.7	Histidine phosphotransferase	histidine phosphotransferase [Pseudoruegeria marinistellae]
-15	Cytochrome c	WP_078059222	WP_068114731.1		PF00171.20	Aldehyde dehydrogenase family	glutamate-5-semialdehyde dehydrogenase [Pseudoruegeria marinistellae]
-15	Cytochrome C	PIW29281	PIW26357.1		PF00521.18	DNA gyrase/topoisomerase IV, subunit A	DNA topoisomerase IV subunit A [Rhodospirillales bacterium CG15_BIG_FIL_POST_REV_8_21_14_020_66_15]
-14	Cytochrome C	PIW29281	PIW26358.1		PF04377.13	Arginine-tRNA-protein transferase, C ter-	arginyltransferase [Rhodospirillales bacterium CG15_BIG_FIL_POST_REV_8_21_14_020_66_15]
-13	Cytochrome C	PIW29281	PIW26359.1		PF13677.4	Membrane MotB of proton-channel complex MotA/MotB	motility protein MotB [Rhodospirillales bacterium CG15_BIG_FIL_POST_REV_8_21_14_020_66_15]
-12	Cytochrome C	PIW29281	PIW26360.1		PF01618.14	MotA/TolQ/ExbB proton channel family	flagellar motor stator protein MotA [Rhodospirillales bacterium CG15_BIG_FIL_POST_REV_8_21_14_020_66_15]
-11	Cytochrome C	PIW29281	PIW26361.1		PF01613.16	Flavin reductase like domain	flavin reductase, partial [Rhodospirillales bacterium CG15_BIG_FIL_POST_REV_8_21_14_020_66_15]
-10	Cytochrome C	PIW29281	PIW28481.1		PF12831.5	FAD dependent oxidoreductase	hypothetical protein COW30_07390, partial [Rhodospirillales bacterium CG15_BIG_FIL_POST_REV_8_21_14_020_66_15]
-9	Cytochrome C	PIW29281	PIW28482.1		PF12831.5	FAD dependent oxidoreductase	FAD-dependent oxidoreductase [Rhodospirillales bacterium CG15_BIG_FIL_POST_REV_8_21_14_020_66_15]
-8	Cytochrome C	PIW29281	PIW28483.1		PF00300.20	Histidine phosphatase superfamily (branch 1)	hypothetical protein COW30_07400 [Rhodospirillales bacterium CG15_BIG_FIL_POST_REV_8_21_14_020_66_15]
-7	Cytochrome C	PIW29281	PIW28484.1		PF00011.19	Hsp20/alpha crystallin family	hypothetical protein COW30_07405 [Rhodospirillales bacterium CG15_BIG_FIL_POST_REV_8_21_14_020_66_15]
-6	Cytochrome C	PIW29281	PIW28485.1		PF00005.25	ABC transporter	heme ABC transporter ATP-binding protein CcmA [Rhodospirillales bacterium CG15_BIG_FIL_POST_REV_8_21_14_020_66_15]
-5	Cytochrome C	PIW29281	PIW28486.1		PF03379.11	CcmB protein	heme exporter protein CcmB [Rhodospirillales bacterium CG15_BIG_FIL_POST_REV_8_21_14_020_66_15]
-4	Cytochrome C	PIW29281	PIW29277.1		PF02659.13	Putative manganese efflux pump	hypothetical protein COW30_05245 [Rhodospirillales bacterium CG15_BIG_FIL_POST_REV_8_21_14_020_66_15]
-3	Cytochrome C	PIW29281	PIW29278.1		PF03061.20	Thioesterase superfamily	thioesterase [Rhodospirillales bacterium CG15_BIG_FIL_POST_REV_8_21_14_020_66_15]
-2	Cytochrome C	PIW29281	PIW29279.1		PF13561.4	Enoyl-(Acyl carrier protein) reductase	3-oxoacyl-ACP reductase [Rhodospirillales bacterium CG15_BIG_FIL_POST_REV_8_21_14_020_66_15]
-1	Cytochrome C	PIW29281	PIW29280.1		PF00815.18	Histidinol dehydrogenase	histidinol dehydrogenase [Rhodospirillales bacterium CG15_BIG_FIL_POST_REV_8_21_14_020_66_15]
0	Cytochrome C	PIW29281	PIW29281.1	RQUA	PF13489.4	Methyltransferase domain	hypothetical protein COW30_05265 [Rhodospirillales bacterium CG15_BIG_FIL_POST_REV_8_21_14_020_66_15]
1	Cytochrome C	PIW29281	PIW29282.1	Cytochrome C	PF03264.12	NapC/NirT cytochrome c family, N-terminal region	cytochrome C [Rhodospirillales bacterium CG15_BIG_FIL_POST_REV_8_21_14_020_66_15]
2	Cytochrome C	PIW29281	PIW29302.1		PF09459.8	Ethylbenzene dehydrogenase	hypothetical protein COW30_05275 [Rhodospirillales bacterium CG15_BIG_FIL_POST_REV_8_21_14_020_66_15]
3	Cytochrome C	PIW29281	PIW29283.1		No Pfam hit	No Pfam hit	hypothetical protein COW30_05280 [Rhodospirillales bacterium CG15_BIG_FIL_POST_REV_8_21_14_020_66_15]
4	Cytochrome C	PIW29281	PIW29284.1		PF12092.6	Protein of unknown function (DUF3568)	hypothetical protein COW30_05285 [Rhodospirillales bacterium CG15_BIG_FIL_POST_REV_8_21_14_020_66_15]
5	Cytochrome C	PIW29281	PIW29285.1		PF16998.3	17 kDa outer membrane surface antigen	hypothetical protein COW30_05290 [Rhodospirillales bacterium CG15_BIG_FIL_POST_REV_8_21_14_020_66_15]
6	Cytochrome C	PIW29281	PIW29286.1		PF01832.18	Mannosyl-glycoprotein endo-beta-N-acetylglucosaminidase	hypothetical protein COW30_05295 [Rhodospirillales bacterium CG15_BIG_FIL_POST_REV_8_21_14_020_66_15]
7	Cytochrome C	PIW29281	PIW29287.1		PF13793.4	N-terminal domain of ribose phosphate pyrophosphokinase	phosphoribosylpyrophosphate synthetase [Rhodospirillales bacterium CG15_BIG_FIL_POST_REV_8_21_14_020_66_15]
8	Cytochrome C	PIW29281	PIW29288.1		PF05818.10	Enterobacterial TraT complement resistance protein	hypothetical protein COW30_05305 [Rhodospirillales bacterium CG15_BIG_FIL_POST_REV_8_21_14_020_66_15]
9	Cytochrome C	PIW29281	PIW29289.1		No Pfam hit	No Pfam hit	hypothetical protein COW30_05310 [Rhodospirillales bacterium CG15_BIG_FIL_POST_REV_8_21_14_020_66_15]
10	Cytochrome C	PIW29281	PIW29290.1		PF02578.13	Multi-copper polyphenol oxidoreductase laccase	peptidoglycan editing factor PgeF [Rhodospirillales bacterium CG15_BIG_FIL_POST_REV_8_21_14_020_66_15]
11	Cytochrome C	PIW29281	PIW29291.1		PF02636.15	Putative S-adenosyl-L-methionine-dependent methyltransferase	methyltransferase [Rhodospirillales bacterium CG15_BIG_FIL_POST_REV_8_21_14_020_66_15]
12	Cytochrome C	PIW29281	PIW29292.1		PF01790.16	Prolipoprotein diacylglyceryl transferase	prolipoprotein diacylglyceryl transferase [Rhodospirillales bacterium CG15_BIG_FIL_POST_REV_8_21_14_020_66_15]
13	Cytochrome C	PIW29281	PIW29293.1		PF01370.19	NAD dependent epimerase/dehydratase family	ADP-glyceromanno-heptose 6-epimerase [Rhodospirillales bacterium CG15_BIG_FIL_POST_REV_8_21_14_020_66_15]
14	Cytochrome C	PIW29281	PIW29294.1		PF04380.11	Membrane fusogenic activity	hypothetical protein COW30_05335 [Rhodospirillales bacterium CG15_BIG_FIL_POST_REV_8_21_14_020_66_15]
15	Cytochrome C	PIW29281	PIW29295.1		PF10722.7	Putative bacterial sensory transduction regulator	hypothetical protein COW30_05340 [Rhodospirillales bacterium CG15_BIG_FIL_POST_REV_8_21_14_020_66_15]
CYTOCHROME C & HEME METABOLISM
-15	Cytochrome c & Heme	OGB50378	OGB50367.1		PF01614.16@IclR@Bacterial transcriptional regulator;PF09339.8@HTH_IclR@IclR helix-turn-helix domain;		DNA-binding transcriptional regulator KdgR [Burkholderiales bacterium RIFOXYD12_FULL_59_19]
-14	Cytochrome c & Heme	OGB50378	OGB50391.1		PF00294.22@PfkB@pfkB family carbohydrate kinase;		hypothetical protein A2503_00025 [Burkholderiales bacterium RIFOXYD12_FULL_59_19]
-13	Cytochrome c & Heme	OGB50378	OGB50368.1		PF01408.20@GFO_IDH_MocA@Oxidoreductase family, NAD-binding Rossmann fold;PF02894.15@GFO_IDH_MocA_C@Oxidoreductase family, C-terminal alpha/beta domain;		oxidoreductase [Burkholderiales bacterium RIFOXYD12_FULL_59_19]
-12	Cytochrome c & Heme	OGB50378	OGB50369.1		PF13442.4@Cytochrome_CBB3@Cytochrome C oxidase, cbb3-type, subunit III;PF00034.19@Cytochrom_C@Cytochrome c;		hypothetical protein A2503_00035 [Burkholderiales bacterium RIFOXYD12_FULL_59_19]
-11	Cytochrome c & Heme	OGB50378	OGB50370.1		PF02195.16@ParBc@ParB-like nuclease domain;		chromosome partitioning protein ParB [Burkholderiales bacterium RIFOXYD12_FULL_59_19]
-10	Cytochrome c & Heme	OGB50378	OGB50371.1		PF06821.11@Ser_hydrolase@Serine hydrolase;PF12697.5@Abhydrolase_6@Alpha/beta hydrolase family;		alpha/beta hydrolase [Burkholderiales bacterium RIFOXYD12_FULL_59_19]
-9	Cytochrome c & Heme	OGB50378	OGB50372.1		PF13614.4@AAA_31@AAA domain;PF01656.21@CbiA@CobQ/CobB/MinD/ParA nucleotide binding domain;PF09140.9@MipZ@ATPase MipZ;PF10609.7@ParA@NUBPL iron-transfer P-loop NTPase;PF06564.10@CBP_BcsQ@Cellulose biosynthesis protein BcsQ;PF00142.16@Fer4_NifH@4Fe-4S iron sulfur cluster binding proteins, NifH/frxC family;PF02374.13@ArsA_ATPase@Anion-transporting ATPase;		chromosome partitioning protein [Burkholderiales bacterium RIFOXYD12_FULL_59_19]
-8	Cytochrome c & Heme	OGB50378	OGB50373.1		PF01810.16@LysE@LysE type translocator;		lysine transporter LysE [Burkholderiales bacterium RIFOXYD12_FULL_59_19]
-7	Cytochrome c & Heme	OGB50378	OGB50374.1		PF02527.13@GidB@rRNA small subunit methyltransferase G;		16S rRNA (guanine(527)-N(7))-methyltransferase [Burkholderiales bacterium RIFOXYD12_FULL_59_19]
-6	Cytochrome c & Heme	OGB50378	OGB50392.1		PF01134.20@GIDA@Glucose inhibited division protein A;PF13932.4@GIDA_assoc@GidA associated domain;PF12831.5@FAD_oxidored@FAD dependent oxidoreductase;PF00890.22@FAD_binding_2@FAD binding domain;PF07992.12@Pyr_redox_2@Pyridine nucleotide-disulphide oxidoreductase;		tRNA uridine-5-carboxymethylaminomethyl(34) synthesis enzyme MnmG [Burkholderiales bacterium RIFOXYD12_FULL_59_19]
-5	Cytochrome c & Heme	OGB50378	OGB50375.1		PF00365.18@PFK@Phosphofructokinase;		6-phosphofructokinase [Burkholderiales bacterium RIFOXYD12_FULL_59_19]
-4	Cytochrome c & Heme	OGB50378	OGB50393.1		PF13417.4@GST_N_3@Glutathione S-transferase, N-terminal domain;PF02798.18@GST_N@Glutathione S-transferase, N-terminal domain;PF13409.4@GST_N_2@Glutathione S-transferase, N-terminal domain;		glutathione transferase GstA [Burkholderiales bacterium RIFOXYD12_FULL_59_19]
-3	Cytochrome c & Heme	OGB50378	OGB50394.1	Cytochrome c	No Hit;		cytochrome C [Burkholderiales bacterium RIFOXYD12_FULL_59_19]
-2	Cytochrome c & Heme	OGB50378	OGB50376.1	Cytochrome c	PF03264.12@Cytochrom_NNT@NapC/NirT cytochrome c family, N-terminal region;PF14537.4@Cytochrom_c3_2@Cytochrome c3;PF09699.8@Paired_CXXCH_1@Doubled CXXCH motif (Paired_CXXCH_1);		hypothetical protein A2503_00085 [Burkholderiales bacterium RIFOXYD12_FULL_59_19]
-1	Cytochrome c & Heme	OGB50378	OGB50377.1	Cytochrome c	PF00034.19@Cytochrom_C@Cytochrome c;		class I cytochrome c [Burkholderiales bacterium RIFOXYD12_FULL_59_19]
0	Cytochrome c & Heme	OGB50378	OGB50378.1	RQUA	PF13649.4@Methyltransf_25@Methyltransferase domain;PF08241.10@Methyltransf_11@Methyltransferase domain;PF01209.16@Ubie_methyltran@ubiE/COQ5 methyltransferase family;PF13847.4@Methyltransf_31@Methyltransferase domain;PF08242.10@Methyltransf_12@Methyltransferase domain;		methyltransferase [Burkholderiales bacterium RIFOXYD12_FULL_59_19]
1	Cytochrome c & Heme	OGB50378	OGB50395.1	heme metabolism	PF00005.25@ABC_tran@ABC transporter;		heme ABC exporter, ATP-binding protein CcmA [Burkholderiales bacterium RIFOXYD12_FULL_59_19]
2	Cytochrome c & Heme	OGB50378	OGB50379.1	heme metabolism	PF03379.11@CcmB@CcmB protein;PF01061.22@ABC2_membrane@ABC-2 type transporter;		heme metabolism export protein CcmB [Burkholderiales bacterium RIFOXYD12_FULL_59_19]
3	Cytochrome c & Heme	OGB50378	OGB50380.1	heme metabolism	PF01578.18@Cytochrom_C_asm@Cytochrome C assembly protein;		heme ABC transporter permease [Burkholderiales bacterium RIFOXYD12_FULL_59_19]
4	Cytochrome c & Heme	OGB50378	OGB50381.1	heme metabolism	PF04995.12@CcmD@heme metabolism export protein D (CcmD);		heme metabolism export protein CcmD [Burkholderiales bacterium RIFOXYD12_FULL_59_19]
5	Cytochrome c & Heme	OGB50378	OGB50396.1	Cytochrome c	PF03100.13@CcmE@CcmE;		cytochrome c biogenesis protein CcmE [Burkholderiales bacterium RIFOXYD12_FULL_59_19]
6	Cytochrome c & Heme	OGB50378	OGB50382.1	Cytochrome c biosynthesis	PF16327.3@CcmF_C@Cytochrome c-type biogenesis protein CcmF C-terminal;PF01578.18@Cytochrom_C_asm@Cytochrome C assembly protein;		c-type cytochrome biogenesis protein CcmF [Burkholderiales bacterium RIFOXYD12_FULL_59_19]
7	Cytochrome c & Heme	OGB50378	OGB50383.1		PF08534.8@Redoxin@Redoxin;PF00578.19@AhpC-TSA@AhpC/TSA family;		thiol:disulfide interchange protein [Burkholderiales bacterium RIFOXYD12_FULL_59_19]
8	Cytochrome c & Heme	OGB50378	OGB50384.1	Cytochrome c	PF03918.12@CcmH@Cytochrome C biogenesis protein;		cytochrome C biogenesis protein CcmH [Burkholderiales bacterium RIFOXYD12_FULL_59_19]
9	Cytochrome c & Heme	OGB50378	OGB50385.1		PF07719.15@TPR_2@Tetratricopeptide repeat;PF13432.4@TPR_16@Tetratricopeptide repeat;PF14559.4@TPR_19@Tetratricopeptide repeat;PF13431.4@TPR_17@Tetratricopeptide repeat;PF00515.26@TPR_1@Tetratricopeptide repeat;PF13428.4@TPR_14@Tetratricopeptide repeat;PF13174.4@TPR_6@Tetratricopeptide repeat;PF13371.4@TPR_9@Tetratricopeptide repeat;PF13181.4@TPR_8@Tetratricopeptide repeat;PF12895.5@ANAPC3@Anaphas…		c-type cytochrome biogenesis protein CcmI [Burkholderiales bacterium RIFOXYD12_FULL_59_19]
10	Cytochrome c & Heme	OGB50378	OGB50397.1		PF03775.14@MinC_C@Septum formation inhibitor MinC, C-terminal domain;PF05209.11@MinC_N@Septum formation inhibitor MinC, N-terminal domain;		septum site-determining protein MinC [Burkholderiales bacterium RIFOXYD12_FULL_59_19]
11	Cytochrome c & Heme	OGB50378	OGB50386.1		PF01656.21@CbiA@CobQ/CobB/MinD/ParA nucleotide binding domain;PF10609.7@ParA@NUBPL iron-transfer P-loop NTPase;PF13614.4@AAA_31@AAA domain;PF09140.9@MipZ@ATPase MipZ;PF02374.13@ArsA_ATPase@Anion-transporting ATPase;PF00142.16@Fer4_NifH@4Fe-4S iron sulfur cluster binding proteins, NifH/frxC family;		septum site-determining protein MinD [Burkholderiales bacterium RIFOXYD12_FULL_59_19]
12	Cytochrome c & Heme	OGB50378	OGB50387.1		PF03776.12@MinE@Septum formation topological specificity factor MinE;		cell division topological specificity factor MinE [Burkholderiales bacterium RIFOXYD12_FULL_59_19]
13	Cytochrome c & Heme	OGB50378	OGB50388.1		PF00122.18@E1-E2_ATPase@E1-E2 ATPase;PF00702.24@Hydrolase@haloacid dehalogenase-like hydrolase;PF00403.24@HMA@Heavy-metal-associated domain;		copper-translocating P-type ATPase [Burkholderiales bacterium RIFOXYD12_FULL_59_19]
14	Cytochrome c & Heme	OGB50378	OGB50389.1		PF00403.24@HMA@Heavy-metal-associated domain;		heavy metal transport/detoxification protein [Burkholderiales bacterium RIFOXYD12_FULL_59_19]
15	Cytochrome c & Heme	OGB50378	OGB50390.1		PF13545.4@HTH_Crp_2@Crp-like helix-turn-helix domain;PF00027.27@cNMP_binding@Cyclic nucleotide-binding domain;PF00325.18@Crp@Bacterial regulatory proteins, crp family;		transcriptional regulator [Burkholderiales bacterium RIFOXYD12_FULL_59_19]
-15	Cytochrome c & Heme	OIP13158	OIP20061.1		PF00682.17@HMGL-like@HMGL-like;		hydroxymethylglutaryl-CoA lyase [Comamonadaceae bacterium CG2_30_57_122]
-14	Cytochrome c & Heme	OIP13158	OIP20062.1		PF08668.10@HDOD@HDOD domain;		hypothetical protein AUK50_03845 [Comamonadaceae bacterium CG2_30_57_122]
-13	Cytochrome c & Heme	OIP13158	OIP20066.1		PF02826.17@2-Hacid_dh_C@D-isomer specific 2-hydroxyacid dehydrogenase, NAD binding domain;PF03446.13@NAD_binding_2@NAD binding domain of 6-phosphogluconate dehydrogenase;		glyoxylate/hydroxypyruvate reductase A [Comamonadaceae bacterium CG2_30_57_122]
-12	Cytochrome c & Heme	OIP13158	OIP20063.1		PF02604.17@PhdYeFM_antitox@Antitoxin Phd_YefM, type II toxin-antitoxin system;		hypothetical protein AUK50_03855 [Comamonadaceae bacterium CG2_30_57_122]
-11	Cytochrome c & Heme	OIP13158	OIP20064.1		PF01850.19@PIN@PIN domain;		VapC toxin family PIN domain ribonuclease, partial [Comamonadaceae bacterium CG2_30_57_122]
-10	Cytochrome c & Heme	OIP13158	OIP15400.1		PF03350.14@UPF0114@Uncharacterized protein family, UPF0114;		TIGR00645 family protein, partial [Comamonadaceae bacterium CG2_30_57_122]
-9	Cytochrome c & Heme	OIP13158	OIP15401.1		PF02690.13@Na_Pi_cotrans@Naﳸ�cotransporter;		hypothetical protein AUK50_10620 [Comamonadaceae bacterium CG2_30_57_122]
-8	Cytochrome c & Heme	OIP13158	OIP15405.1		PF03334.12@PhaG_MnhG_YufB@Naﱿ� antiporter subunit;		Naﱿ� antiporter subunit G [Comamonadaceae bacterium CG2_30_57_122]
-7	Cytochrome c & Heme	OIP13158	OIP15402.1		PF04066.11@MrpF_PhaF@Multiple resistance and pH regulation protein F (MrpF / PhaF);		Kﱿ� antiporter subunit F [Comamonadaceae bacterium CG2_30_57_122]
-6	Cytochrome c & Heme	OIP13158	OIP15403.1		PF01899.14@MNHE@Naﱿ� ion antiporter subunit;		Naﱿ� antiporter subunit E [Comamonadaceae bacterium CG2_30_57_122]
-5	Cytochrome c & Heme	OIP13158	OIP15404.1		PF00361.18@Proton_antipo_M@Proton-conducting membrane transporter;		monovalent cation/H antiporter subunit D, partial [Comamonadaceae bacterium CG2_30_57_122]
-4	Cytochrome c & Heme	OIP13158	OIP13137.1		PF00043.23@GST_C@Glutathione S-transferase, C-terminal domain;PF14497.4@GST_C_3@Glutathione S-transferase, C-terminal domain;PF02798.18@GST_N@Glutathione S-transferase, N-terminal domain;PF13417.4@GST_N_3@Glutathione S-transferase, N-terminal domain;PF13409.4@GST_N_2@Glutathione S-transferase, N-terminal domain;PF13410.4@GST_C_2@Glutathione S-transferase, C-terminal domain;		glutathione transferase GstA [Comamonadaceae bacterium CG2_30_57_122]
-3	Cytochrome c & Heme	OIP13158	OIP13156.1	Cytochrome c	No Hit;		cytochrome C [Comamonadaceae bacterium CG2_30_57_122]
-2	Cytochrome c & Heme	OIP13158	OIP13138.1	Cytochrome c	PF03264.12@Cytochrom_NNT@NapC/NirT cytochrome c family, N-terminal region;PF14537.4@Cytochrom_c3_2@Cytochrome c3;PF09699.8@Paired_CXXCH_1@Doubled CXXCH motif (Paired_CXXCH_1);		hypothetical protein AUK50_14035 [Comamonadaceae bacterium CG2_30_57_122]
-1	Cytochrome c & Heme	OIP13158	OIP13157.1	Cytochrome c	No Hit;		class I cytochrome c [Comamonadaceae bacterium CG2_30_57_122]
0	Cytochrome c & Heme	OIP13158	OIP13158.1	RQUA	PF13649.4@Methyltransf_25@Methyltransferase domain;PF08241.10@Methyltransf_11@Methyltransferase domain;PF01209.16@Ubie_methyltran@ubiE/COQ5 methyltransferase family;PF08242.10@Methyltransf_12@Methyltransferase domain;		methyltransferase [Comamonadaceae bacterium CG2_30_57_122]
1	Cytochrome c & Heme	OIP13158	OIP13159.1	heme metabolism	PF00005.25@ABC_tran@ABC transporter;		heme ABC exporter, ATP-binding protein CcmA [Comamonadaceae bacterium CG2_30_57_122]
2	Cytochrome c & Heme	OIP13158	OIP13139.1	heme metabolism	PF03379.11@CcmB@CcmB protein;PF01061.22@ABC2_membrane@ABC-2 type transporter;		heme metabolism export protein CcmB [Comamonadaceae bacterium CG2_30_57_122]
3	Cytochrome c & Heme	OIP13158	OIP13140.1	heme metabolism	PF01578.18@Cytochrom_C_asm@Cytochrome C assembly protein;		heme ABC transporter permease [Comamonadaceae bacterium CG2_30_57_122]
4	Cytochrome c & Heme	OIP13158	OIP13141.1	heme metabolism	PF04995.12@CcmD@heme metabolism export protein D (CcmD);		heme metabolism export protein CcmD [Comamonadaceae bacterium CG2_30_57_122]
5	Cytochrome c & Heme	OIP13158	OIP13142.1	Cytochrome c	PF03100.13@CcmE@CcmE;		cytochrome c biogenesis protein CcmE [Comamonadaceae bacterium CG2_30_57_122]
6	Cytochrome c & Heme	OIP13158	OIP13143.1	Cytochrome c	PF16327.3@CcmF_C@Cytochrome c-type biogenesis protein CcmF C-terminal;PF01578.18@Cytochrom_C_asm@Cytochrome C assembly protein;		c-type cytochrome biogenesis protein CcmF [Comamonadaceae bacterium CG2_30_57_122]
7	Cytochrome c & Heme	OIP13158	OIP13144.1		PF08534.8@Redoxin@Redoxin;PF00578.19@AhpC-TSA@AhpC/TSA family;		thiol:disulfide interchange protein [Comamonadaceae bacterium CG2_30_57_122]
8	Cytochrome c & Heme	OIP13158	OIP13145.1	Cytochrome c	PF03918.12@CcmH@Cytochrome C biogenesis protein;		cytochrome C biogenesis protein CcmH [Comamonadaceae bacterium CG2_30_57_122]
9	Cytochrome c & Heme	OIP13158	OIP13146.1	Cytochrome c	PF07719.15@TPR_2@Tetratricopeptide repeat;PF13432.4@TPR_16@Tetratricopeptide repeat;PF14559.4@TPR_19@Tetratricopeptide repeat;PF00515.26@TPR_1@Tetratricopeptide repeat;PF13431.4@TPR_17@Tetratricopeptide repeat;PF13371.4@TPR_9@Tetratricopeptide repeat;PF13428.4@TPR_14@Tetratricopeptide repeat;PF03704.15@BTAD@Bacterial transcriptional activator domain;		c-type cytochrome biogenesis protein CcmI [Comamonadaceae bacterium CG2_30_57_122]
10	Cytochrome c & Heme	OIP13158	OIP13160.1		PF03775.14@MinC_C@Septum formation inhibitor MinC, C-terminal domain;PF05209.11@MinC_N@Septum formation inhibitor MinC, N-terminal domain;		septum site-determining protein MinC [Comamonadaceae bacterium CG2_30_57_122]
11	Cytochrome c & Heme	OIP13158	OIP13147.1		PF01656.21@CbiA@CobQ/CobB/MinD/ParA nucleotide binding domain;PF10609.7@ParA@NUBPL iron-transfer P-loop NTPase;PF13614.4@AAA_31@AAA domain;PF09140.9@MipZ@ATPase MipZ;PF02374.13@ArsA_ATPase@Anion-transporting ATPase;		septum site-determining protein MinD [Comamonadaceae bacterium CG2_30_57_122]
12	Cytochrome c & Heme	OIP13158	OIP13148.1		PF03776.12@MinE@Septum formation topological specificity factor MinE;		cell division topological specificity factor MinE [Comamonadaceae bacterium CG2_30_57_122]
13	Cytochrome c & Heme	OIP13158	OIP13149.1		PF00122.18@E1-E2_ATPase@E1-E2 ATPase;PF00702.24@Hydrolase@haloacid dehalogenase-like hydrolase;PF00403.24@HMA@Heavy-metal-associated domain;		copper-translocating P-type ATPase [Comamonadaceae bacterium CG2_30_57_122]
14	Cytochrome c & Heme	OIP13158	OIP13150.1		PF00403.24@HMA@Heavy-metal-associated domain;		heavy metal transport/detoxification protein [Comamonadaceae bacterium CG2_30_57_122]
15	Cytochrome c & Heme	OIP13158	OIP13151.1		PF13545.4@HTH_Crp_2@Crp-like helix-turn-helix domain;PF00027.27@cNMP_binding@Cyclic nucleotide-binding domain;		transcriptional regulator [Comamonadaceae bacterium CG2_30_57_122]
-13	Cytochrome c & Heme	OIP19387	OIP19376.1		PF02653.14@BPD_transp_2@Branched-chain amino acid transport system / permease component;		branched-chain amino acid ABC transporter permease [Comamonadaceae bacterium CG2_30_59_20]
-12	Cytochrome c & Heme	OIP19387	OIP19377.1		PF02653.14@BPD_transp_2@Branched-chain amino acid transport system / permease component;		hypothetical protein AUK51_01630 [Comamonadaceae bacterium CG2_30_59_20]
-11	Cytochrome c & Heme	OIP19387	OIP19378.1		PF03776.12@MinE@Septum formation topological specificity factor MinE;		cell division topological specificity factor MinE [Comamonadaceae bacterium CG2_30_59_20]
-10	Cytochrome c & Heme	OIP19387	OIP19402.1		PF01656.21@CbiA@CobQ/CobB/MinD/ParA nucleotide binding domain;PF10609.7@ParA@NUBPL iron-transfer P-loop NTPase;PF13614.4@AAA_31@AAA domain;PF09140.9@MipZ@ATPase MipZ;PF02374.13@ArsA_ATPase@Anion-transporting ATPase;PF00142.16@Fer4_NifH@4Fe-4S iron sulfur cluster binding proteins, NifH/frxC family;		septum site-determining protein MinD [Comamonadaceae bacterium CG2_30_59_20]
-9	Cytochrome c & Heme	OIP19387	OIP19379.1		PF03775.14@MinC_C@Septum formation inhibitor MinC, C-terminal domain;PF05209.11@MinC_N@Septum formation inhibitor MinC, N-terminal domain;		septum site-determining protein MinC [Comamonadaceae bacterium CG2_30_59_20]
-8	Cytochrome c & Heme	OIP19387	OIP19380.1		PF07719.15@TPR_2@Tetratricopeptide repeat;PF00515.26@TPR_1@Tetratricopeptide repeat;PF13432.4@TPR_16@Tetratricopeptide repeat;PF14559.4@TPR_19@Tetratricopeptide repeat;PF13431.4@TPR_17@Tetratricopeptide repeat;PF13428.4@TPR_14@Tetratricopeptide repeat;PF13371.4@TPR_9@Tetratricopeptide repeat;PF13181.4@TPR_8@Tetratricopeptide repeat;PF13414.4@TPR_11@TPR repeat;PF07721.12@TPR_4@Tetratricopeptide re…		c-type cytochrome biogenesis protein CcmI [Comamonadaceae bacterium CG2_30_59_20]
-7	Cytochrome c & Heme	OIP19387	OIP19381.1	Cytochrome c	PF03918.12@CcmH@Cytochrome C biogenesis protein;		cytochrome C biogenesis protein CcmH [Comamonadaceae bacterium CG2_30_59_20]
-6	Cytochrome c & Heme	OIP19387	OIP19382.1		PF00578.19@AhpC-TSA@AhpC/TSA family;PF08534.8@Redoxin@Redoxin;PF13905.4@Thioredoxin_8@Thioredoxin-like;		thiol:disulfide interchange protein [Comamonadaceae bacterium CG2_30_59_20]
-5	Cytochrome c & Heme	OIP19387	OIP19383.1	Cytochrome c	PF03100.13@CcmE@CcmE;		cytochrome c biogenesis protein CcmE [Comamonadaceae bacterium CG2_30_59_20]
-4	Cytochrome c & Heme	OIP19387	OIP19384.1	heme metabolism	PF04995.12@CcmD@heme metabolism export protein D (CcmD);		heme metabolism export protein CcmD [Comamonadaceae bacterium CG2_30_59_20]
-3	Cytochrome c & Heme	OIP19387	OIP19385.1	heme metabolism	PF01578.18@Cytochrom_C_asm@Cytochrome C assembly protein;		heme ABC transporter permease [Comamonadaceae bacterium CG2_30_59_20]
-2	Cytochrome c & Heme	OIP19387	OIP19386.1	heme metabolism	PF03379.11@CcmB@CcmB protein;		heme metabolism export protein CcmB [Comamonadaceae bacterium CG2_30_59_20]
-1	Cytochrome c & Heme	OIP19387	OIP19403.1	heme metabolism	PF00005.25@ABC_tran@ABC transporter;		hypothetical protein AUK51_01690 [Comamonadaceae bacterium CG2_30_59_20]
0	Cytochrome c & Heme	OIP19387	OIP19387.1	RQUA	PF13649.4@Methyltransf_25@Methyltransferase domain;PF08241.10@Methyltransf_11@Methyltransferase domain;PF01209.16@Ubie_methyltran@ubiE/COQ5 methyltransferase family;PF13847.4@Methyltransf_31@Methyltransferase domain;		methyltransferase [Comamonadaceae bacterium CG2_30_59_20]
1	Cytochrome c & Heme	OIP19387	OIP19388.1		No Hit;		hypothetical protein AUK51_01700 [Comamonadaceae bacterium CG2_30_59_20]
2	Cytochrome c & Heme	OIP19387	OIP19389.1		PF03264.12@Cytochrom_NNT@NapC/NirT cytochrome c family, N-terminal region;PF14537.4@Cytochrom_c3_2@Cytochrome c3;PF09699.8@Paired_CXXCH_1@Doubled CXXCH motif (Paired_CXXCH_1);		hypothetical protein AUK51_01705 [Comamonadaceae bacterium CG2_30_59_20]
3	Cytochrome c & Heme	OIP19387	OIP19390.1	Cytochrome c	No Hit;		cytochrome C [Comamonadaceae bacterium CG2_30_59_20]
4	Cytochrome c & Heme	OIP19387	OIP19391.1		PF00043.23@GST_C@Glutathione S-transferase, C-terminal domain;PF14497.4@GST_C_3@Glutathione S-transferase, C-terminal domain;PF13410.4@GST_C_2@Glutathione S-transferase, C-terminal domain;PF13417.4@GST_N_3@Glutathione S-transferase, N-terminal domain;PF02798.18@GST_N@Glutathione S-transferase, N-terminal domain;PF13409.4@GST_N_2@Glutathione S-transferase, N-terminal domain;		glutathione transferase GstA [Comamonadaceae bacterium CG2_30_59_20]
5	Cytochrome c & Heme	OIP19387	OIP19392.1		PF03358.13@FMN_red@NADPH-dependent FMN reductase;PF02525.15@Flavodoxin_2@Flavodoxin-like fold;		NADPH-dependent FMN reductase [Comamonadaceae bacterium CG2_30_59_20]
6	Cytochrome c & Heme	OIP19387	OIP19393.1		PF00365.18@PFK@Phosphofructokinase;		6-phosphofructokinase [Comamonadaceae bacterium CG2_30_59_20]
7	Cytochrome c & Heme	OIP19387	OIP19394.1		PF02527.13@GidB@rRNA small subunit methyltransferase G;		16S rRNA (guanine(527)-N(7))-methyltransferase RsmG [Comamonadaceae bacterium CG2_30_59_20]
8	Cytochrome c & Heme	OIP19387	OIP19395.1		PF13614.4@AAA_31@AAA domain;PF01656.21@CbiA@CobQ/CobB/MinD/ParA nucleotide binding domain;PF09140.9@MipZ@ATPase MipZ;PF10609.7@ParA@NUBPL iron-transfer P-loop NTPase;PF06564.10@CBP_BcsQ@Cellulose biosynthesis protein BcsQ;PF00142.16@Fer4_NifH@4Fe-4S iron sulfur cluster binding proteins, NifH/frxC family;PF02374.13@ArsA_ATPase@Anion-transporting ATPase;		chromosome partitioning protein [Comamonadaceae bacterium CG2_30_59_20]
9	Cytochrome c & Heme	OIP19387	OIP19396.1		PF06821.11@Ser_hydrolase@Serine hydrolase;PF12697.5@Abhydrolase_6@Alpha/beta hydrolase family;		alpha/beta hydrolase [Comamonadaceae bacterium CG2_30_59_20]
10	Cytochrome c & Heme	OIP19387	OIP19397.1		PF02195.16@ParBc@ParB-like nuclease domain;		chromosome partitioning protein ParB [Comamonadaceae bacterium CG2_30_59_20]
11	Cytochrome c & Heme	OIP19387	OIP19398.1		PF13442.4@Cytochrome_CBB3@Cytochrome C oxidase, cbb3-type, subunit III;PF00034.19@Cytochrom_C@Cytochrome c;		hypothetical protein AUK51_01755 [Comamonadaceae bacterium CG2_30_59_20]
12	Cytochrome c & Heme	OIP19387	OIP19399.1	Cytochrome c	PF00034.19@Cytochrom_C@Cytochrome c;		cytochrome C [Comamonadaceae bacterium CG2_30_59_20]
-15	Cytochrome c & Heme	OQW86081	OQW86102.1		PF04198.11@Sugar-bind@Putative sugar-binding domain;PF08281.10@Sigma70_r4_2@Sigma-70, region 4;		DNA-binding transcriptional regulator [Rhodoferax ferrireducens]
-14	Cytochrome c & Heme	OQW86081	OQW86103.1		No Hit;		hypothetical protein BWK72_18875 [Rhodoferax ferrireducens]
-13	Cytochrome c & Heme	OQW86081	OQW86069.1		PF03741.14@TerC@Integral membrane protein TerC family;		hypothetical protein BWK72_18880 [Rhodoferax ferrireducens]
-12	Cytochrome c & Heme	OQW86081	OQW86070.1		PF00582.24@Usp@Universal stress protein family;		hypothetical protein BWK72_18885 [Rhodoferax ferrireducens]
-11	Cytochrome c & Heme	OQW86081	OQW86071.1		No Hit;		methyltransferase type 12 [Rhodoferax ferrireducens]
-10	Cytochrome c & Heme	OQW86081	OQW86072.1		PF02195.16@ParBc@ParB-like nuclease domain;		chromosome partitioning protein ParB [Rhodoferax ferrireducens]
-9	Cytochrome c & Heme	OQW86081	OQW86073.1		PF06821.11@Ser_hydrolase@Serine hydrolase;PF00561.18@Abhydrolase_1@alpha/beta hydrolase fold;PF12697.5@Abhydrolase_6@Alpha/beta hydrolase family;		alpha/beta hydrolase [Rhodoferax ferrireducens]
-8	Cytochrome c & Heme	OQW86081	OQW86074.1		PF13614.4@AAA_31@AAA domain;PF01656.21@CbiA@CobQ/CobB/MinD/ParA nucleotide binding domain;PF09140.9@MipZ@ATPase MipZ;PF10609.7@ParA@NUBPL iron-transfer P-loop NTPase;PF06564.10@CBP_BcsQ@Cellulose biosynthesis protein BcsQ;PF00142.16@Fer4_NifH@4Fe-4S iron sulfur cluster binding proteins, NifH/frxC family;PF02374.13@ArsA_ATPase@Anion-transporting ATPase;		chromosome partitioning protein [Rhodoferax ferrireducens]
-7	Cytochrome c & Heme	OQW86081	OQW86075.1		PF01810.16@LysE@LysE type translocator;		lysine transporter LysE [Rhodoferax ferrireducens]
-6	Cytochrome c & Heme	OQW86081	OQW86076.1		PF02527.13@GidB@rRNA small subunit methyltransferase G;		16S rRNA (guanine(527)-N(7))-methyltransferase RsmG [Rhodoferax ferrireducens]
-5	Cytochrome c & Heme	OQW86081	OQW86077.1		PF13511.4@DUF4124@Domain of unknown function (DUF4124);		hypothetical protein BWK72_18920 [Rhodoferax ferrireducens]
-4	Cytochrome c & Heme	OQW86081	OQW86078.1		No Hit;		hypothetical protein BWK72_18925 [Rhodoferax ferrireducens]
-3	Cytochrome c & Heme	OQW86081	OQW86079.1		PF01134.20@GIDA@Glucose inhibited division protein A;PF13932.4@GIDA_assoc@GidA associated domain;PF12831.5@FAD_oxidored@FAD dependent oxidoreductase;		tRNA uridine-5-carboxymethylaminomethyl(34) synthesis enzyme MnmG [Rhodoferax ferrireducens]
-2	Cytochrome c & Heme	OQW86081	OQW86104.1		PF00365.18@PFK@Phosphofructokinase;		6-phosphofructokinase [Rhodoferax ferrireducens]
-1	Cytochrome c & Heme	OQW86081	OQW86080.1		PF02798.18@GST_N@Glutathione S-transferase, N-terminal domain;PF00043.23@GST_C@Glutathione S-transferase, C-terminal domain;PF14497.4@GST_C_3@Glutathione S-transferase, C-terminal domain;PF13409.4@GST_N_2@Glutathione S-transferase, N-terminal domain;PF13417.4@GST_N_3@Glutathione S-transferase, N-terminal domain;		glutathione transferase GstA [Rhodoferax ferrireducens]
0	Cytochrome c & Heme	OQW86081	OQW86081.1	RQUA	PF13649.4@Methyltransf_25@Methyltransferase domain;PF08241.10@Methyltransf_11@Methyltransferase domain;PF01209.16@Ubie_methyltran@ubiE/COQ5 methyltransferase family;PF13847.4@Methyltransf_31@Methyltransferase domain;PF08242.10@Methyltransf_12@Methyltransferase domain;PF05401.9@NodS@Nodulation protein S (NodS);		methyltransferase [Rhodoferax ferrireducens]
1	Cytochrome c & Heme	OQW86081	OQW86105.1		PF00005.25@ABC_tran@ABC transporter;		hypothetical protein BWK72_18950 [Rhodoferax ferrireducens]
2	Cytochrome c & Heme	OQW86081	OQW86082.1	heme metabolism	PF03379.11@CcmB@CcmB protein;PF01061.22@ABC2_membrane@ABC-2 type transporter;		heme metabolism export protein CcmB [Rhodoferax ferrireducens]
3	Cytochrome c & Heme	OQW86081	OQW86083.1	heme metabolism	PF01578.18@Cytochrom_C_asm@Cytochrome C assembly protein;		heme ABC transporter permease [Rhodoferax ferrireducens]
4	Cytochrome c & Heme	OQW86081	OQW86084.1	heme metabolism	PF04995.12@CcmD@heme metabolism export protein D (CcmD);		heme metabolism export protein CcmD [Rhodoferax ferrireducens]
5	Cytochrome c & Heme	OQW86081	OQW86085.1	Cytochrome c	PF03100.13@CcmE@CcmE;		cytochrome c biogenesis protein CcmE [Rhodoferax ferrireducens]
6	Cytochrome c & Heme	OQW86081	OQW86086.1	Cytochrome c	PF16327.3@CcmF_C@Cytochrome c-type biogenesis protein CcmF C-terminal;PF01578.18@Cytochrom_C_asm@Cytochrome C assembly protein;		c-type cytochrome biogenesis protein CcmF [Rhodoferax ferrireducens]
7	Cytochrome c & Heme	OQW86081	OQW86087.1		PF00578.19@AhpC-TSA@AhpC/TSA family;PF08534.8@Redoxin@Redoxin;		thiol:disulfide interchange protein [Rhodoferax ferrireducens]
8	Cytochrome c & Heme	OQW86081	OQW86088.1		PF03918.12@CcmH@Cytochrome C biogenesis protein;		cytochrome C biogenesis protein CcmH [Rhodoferax ferrireducens]
9	Cytochrome c & Heme	OQW86081	OQW86089.1	Cytochrome c	PF07719.15@TPR_2@Tetratricopeptide repeat;PF13432.4@TPR_16@Tetratricopeptide repeat;PF14559.4@TPR_19@Tetratricopeptide repeat;PF00515.26@TPR_1@Tetratricopeptide repeat;PF13431.4@TPR_17@Tetratricopeptide repeat;PF13174.4@TPR_6@Tetratricopeptide repeat;PF13428.4@TPR_14@Tetratricopeptide repeat;PF12895.5@ANAPC3@Anaphase-promoting complex, cyclosome, subunit 3;		c-type cytochrome biogenesis protein CcmI [Rhodoferax ferrireducens]
10	Cytochrome c & Heme	OQW86081	OQW86090.1		PF03775.14@MinC_C@Septum formation inhibitor MinC, C-terminal domain;		septum site-determining protein MinC [Rhodoferax ferrireducens]
11	Cytochrome c & Heme	OQW86081	OQW86091.1		PF01656.21@CbiA@CobQ/CobB/MinD/ParA nucleotide binding domain;PF10609.7@ParA@NUBPL iron-transfer P-loop NTPase;PF13614.4@AAA_31@AAA domain;PF09140.9@MipZ@ATPase MipZ;PF02374.13@ArsA_ATPase@Anion-transporting ATPase;		septum site-determining protein MinD [Rhodoferax ferrireducens]
12	Cytochrome c & Heme	OQW86081	OQW86092.1		PF03776.12@MinE@Septum formation topological specificity factor MinE;		cell division topological specificity factor MinE [Rhodoferax ferrireducens]
13	Cytochrome c & Heme	OQW86081	OQW86093.1		PF13442.4@Cytochrome_CBB3@Cytochrome C oxidase, cbb3-type, subunit III;PF00034.19@Cytochrom_C@Cytochrome c;		hypothetical protein BWK72_19010 [Rhodoferax ferrireducens]
14	Cytochrome c & Heme	OQW86081	OQW86094.1		PF00122.18@E1-E2_ATPase@E1-E2 ATPase;PF00702.24@Hydrolase@haloacid dehalogenase-like hydrolase;PF00403.24@HMA@Heavy-metal-associated domain;PF12710.5@HAD@haloacid dehalogenase-like hydrolase;		copper-translocating P-type ATPase [Rhodoferax ferrireducens]
15	Cytochrome c & Heme	OQW86081	OQW86095.1		PF00403.24@HMA@Heavy-metal-associated domain;		hypothetical protein BWK72_19020 [Rhodoferax ferrireducens]
15	Cytochrome c & Heme metabolism	OIN93610	OIN93646.1		PF02441.17	Flavoprotein	3-octaprenyl-4-hydroxybenzoate carboxy-lyase [Comamonadaceae bacterium CG1_02_60_18]
14	Cytochrome c & Heme metabolism	OIN93610	OIN93597.1		PF01977.14	3-octaprenyl-4-hydroxybenzoate carboxy-lyase	3-octaprenyl-4-hydroxybenzoate decarboxylase [Comamonadaceae bacterium CG1_02_60_18]
13	Cytochrome c & Heme metabolism	OIN93610	OIN93598.1		PF07786.10	Protein of unknown function (DUF1624)	hypothetical protein AUJ20_03485 [Comamonadaceae bacterium CG1_02_60_18]
12	Cytochrome c & Heme metabolism	OIN93610	OIN93599.1		PF03776.12	Septum formation topological specificity factor MinE	cell division topological specificity factor MinE [Comamonadaceae bacterium CG1_02_60_18]
11	Cytochrome c & Heme metabolism	OIN93610	OIN93600.1		PF01656.21	CobQ/CobB/MinD/ParA nucleotide binding domain	septum site-determining protein MinD [Comamonadaceae bacterium CG1_02_60_18]
10	Cytochrome c & Heme metabolism	OIN93610	OIN93601.1		PF03775.14	Septum formation inhibitor MinC, C-terminal domain	septum site-determining protein MinC [Comamonadaceae bacterium CG1_02_60_18]
9	Cytochrome c & Heme metabolism	OIN93610	OIN93602.1		PF07719.15	Tetratricopeptide repeat	c-type cytochrome biogenesis protein CcmI [Comamonadaceae bacterium CG1_02_60_18]
8	Cytochrome c & Heme metabolism	OIN93610	OIN93603.1	Cytochrome c	PF03918.12	Cytochrome C biogenesis protein	cytochrome C biogenesis protein CcmH [Comamonadaceae bacterium CG1_02_60_18]
7	Cytochrome c & Heme metabolism	OIN93610	OIN93604.1		PF08534.8	Redoxin	thiol:disulfide interchange protein [Comamonadaceae bacterium CG1_02_60_18]
6	Cytochrome c & Heme metabolism	OIN93610	OIN93605.1	Cytochrome c	PF16327.3	Cytochrome c-type biogenesis protein CcmF C-terminal	c-type cytochrome biogenesis protein CcmF [Comamonadaceae bacterium CG1_02_60_18]
5	Cytochrome c & Heme metabolism	OIN93610	OIN93606.1		PF03100.13	CcmE	cytochrome c biogenesis protein CcmE [Comamonadaceae bacterium CG1_02_60_18]
4	Cytochrome c & Heme metabolism	OIN93610	OIN93607.1	Heme	PF04995.12	Heme exporter protein D (CcmD)	heme exporter protein CcmD [Comamonadaceae bacterium CG1_02_60_18]
3	Cytochrome c & Heme metabolism	OIN93610	OIN93608.1	Cytochrome c	PF01578.18	Cytochrome C assembly protein	heme ABC transporter permease [Comamonadaceae bacterium CG1_02_60_18]
2	Cytochrome c & Heme metabolism	OIN93610	OIN93609.1		PF03379.11	CcmB protein	heme exporter protein CcmB [Comamonadaceae bacterium CG1_02_60_18]
1	Cytochrome c & Heme metabolism	OIN93610	OIN93648.1		PF00005.25	ABC transporter	heme ABC exporter, ATP-binding protein CcmA [Comamonadaceae bacterium CG1_02_60_18]
0	Cytochrome c & Heme metabolism	OIN93610	OIN93610.1	RQUA	PF13649.4	Methyltransferase domain	methyltransferase [Comamonadaceae bacterium CG1_02_60_18]
-1	Cytochrome c & Heme metabolism	OIN93610	OIN93611.1		PF00043.23	Glutathione S-transferase, C-terminal domain	glutathione transferase GstA [Comamonadaceae bacterium CG1_02_60_18]
-2	Cytochrome c & Heme metabolism	OIN93610	OIN93612.1		PF00365.18	Phosphofructokinase	6-phosphofructokinase [Comamonadaceae bacterium CG1_02_60_18]
-3	Cytochrome c & Heme metabolism	OIN93610	OIN93613.1		PF01134.20	Glucose inhibited division protein A	tRNA uridine-5-carboxymethylaminomethyl(34) synthesis enzyme MnmG [Comamonadaceae bacterium CG1_02_60_18]
-4	Cytochrome c & Heme metabolism	OIN93610	OIN93614.1		PF02527.13	rRNA small subunit methyltransferase G	16S rRNA (guanine(527)-N(7))-methyltransferase RsmG [Comamonadaceae bacterium CG1_02_60_18]
-5	Cytochrome c & Heme metabolism	OIN93610	OIN93615.1		PF01810.16	LysE type translocator	lysine transporter LysE [Comamonadaceae bacterium CG1_02_60_18]
-6	Cytochrome c & Heme metabolism	OIN93610	OIN93616.1		PF13614.4	AAA domain	chromosome partitioning protein [Comamonadaceae bacterium CG1_02_60_18]
-7	Cytochrome c & Heme metabolism	OIN93610	OIN93617.1		PF06821.11	Serine hydrolase	alpha/beta hydrolase [Comamonadaceae bacterium CG1_02_60_18]
-8	Cytochrome c & Heme metabolism	OIN93610	OIN93618.1		PF02195.16	ParB-like nuclease domain	chromosome partitioning protein ParB [Comamonadaceae bacterium CG1_02_60_18]
-9	Cytochrome c & Heme metabolism	OIN93610	OIN93619.1		PF13649.4	Methyltransferase domain	methyltransferase type 12 [Comamonadaceae bacterium CG1_02_60_18]
-10	Cytochrome c & Heme metabolism	OIN93610	OIN93649.1		PF02225.20	PA domain	hypothetical protein AUJ20_03600 [Comamonadaceae bacterium CG1_02_60_18]
-11	Cytochrome c & Heme metabolism	OIN93610	OIN93650.1		PF12146.6	Serine aminopeptidase, S33	hypothetical protein AUJ20_03610 [Comamonadaceae bacterium CG1_02_60_18]
-12	Cytochrome c & Heme metabolism	OIN93610	OIN93620.1		PF00246.22	Zinc carboxypeptidase	zinc carboxypeptidase [Comamonadaceae bacterium CG1_02_60_18]
-13	Cytochrome c & Heme metabolism	OIN93610	OIN93621.1	PFO	PF12367.6	Pyruvate ferredoxin oxidoreductase beta subunit C terminal	hypothetical protein AUJ20_03625 [Comamonadaceae bacterium CG1_02_60_18]
-15	Cytochrome c & Heme & Hydrogenase maturation	OIP20041	OIP24802.1		PF00696.26@AA_kinase@Amino acid kinase family;		acetylglutamate kinase, partial [Comamonadaceae bacterium CG2_30_60_41]
-14	Cytochrome c & Heme & Hydrogenase maturation	OIP20041	OIP24803.1		PF00440.21@TetR_N@Bacterial regulatory proteins, tetR family;		TetR family transcriptional regulator [Comamonadaceae bacterium CG2_30_60_41]
-13	Cytochrome c & Heme & Hydrogenase maturation	OIP20041	OIP24804.1		PF00441.22@Acyl-CoA_dh_1@Acyl-CoA dehydrogenase, C-terminal domain;PF12806.5@Acyl-CoA_dh_C@Acetyl-CoA dehydrogenase C-terminal like;PF02770.17@Acyl-CoA_dh_M@Acyl-CoA dehydrogenase, middle domain;PF12418.6@AcylCoA_DH_N@Acyl-CoA dehydrogenase N terminal;PF02771.14@Acyl-CoA_dh_N@Acyl-CoA dehydrogenase, N-terminal domain;PF08028.9@Acyl-CoA_dh_2@Acyl-CoA dehydrogenase, C-terminal domain;		acyl-CoA dehydrogenase, partial [Comamonadaceae bacterium CG2_30_60_41]
-12	Cytochrome c & Heme & Hydrogenase maturation	OIP20041	OIP22378.1		PF01300.16@Sua5_yciO_yrdC@Telomere recombination;PF00814.23@Peptidase_M22@Glycoprotease family;		carbamoyltransferase HypF, partial [Comamonadaceae bacterium CG2_30_60_41]
-11	Cytochrome c & Heme & Hydrogenase maturation	OIP20041	OIP22379.1	Hydrogenase maturation protein	PF01455.16@HupF_HypC@HupF/HypC family;		hydrogenase assembly protein HupF [Comamonadaceae bacterium CG2_30_60_41]
-10	Cytochrome c & Heme & Hydrogenase maturation	OIP20041	OIP22380.1	Hydrogenase maturation protein	PF01924.14@HypD@Hydrogenase formation hypA family;		hydrogenase formation protein HypD [Comamonadaceae bacterium CG2_30_60_41]
-9	Cytochrome c & Heme & Hydrogenase maturation	OIP20041	OIP22381.1	Hydrogenase maturation protein	PF02769.20@AIRS_C@AIR synthase related protein, C-terminal domain;PF00586.22@AIRS@AIR synthase related protein, N-terminal domain;		hydrogenase expression/formation protein HypE [Comamonadaceae bacterium CG2_30_60_41]
-8	Cytochrome c & Heme & Hydrogenase maturation	OIP20041	OIP22382.1		PF09899.7@DUF2126@Putative amidoligase enzyme (DUF2126);		hypothetical protein AUK52_06210 [Comamonadaceae bacterium CG2_30_60_41]
-7	Cytochrome c & Heme & Hydrogenase maturation	OIP20041	OIP22383.1		PF02492.17@cobW@CobW/HypB/UreG, nucleotide-binding domain;		urease accessory protein UreG [Comamonadaceae bacterium CG2_30_60_41]
-6	Cytochrome c & Heme & Hydrogenase maturation	OIP20041	OIP20039.1	Cytochrome c	PF01578.18@Cytochrom_C_asm@Cytochrome C assembly protein;PF16327.3@CcmF_C@Cytochrome c-type biogenesis protein CcmF C-terminal;		c-type cytochrome biogenesis protein CcmF, partial [Comamonadaceae bacterium CG2_30_60_41]
-5	Cytochrome c & Heme & Hydrogenase maturation	OIP20041	OIP20025.1	Cytochrome c	PF03100.13@CcmE@CcmE;		cytochrome c biogenesis protein CcmE [Comamonadaceae bacterium CG2_30_60_41]
-4	Cytochrome c & Heme & Hydrogenase maturation	OIP20041	OIP20026.1	heme metabolism	PF04995.12@CcmD@heme metabolism export protein D (CcmD);		heme metabolism export protein CcmD [Comamonadaceae bacterium CG2_30_60_41]
-3	Cytochrome c & Heme & Hydrogenase maturation	OIP20041	OIP20027.1	heme metabolism	PF01578.18@Cytochrom_C_asm@Cytochrome C assembly protein;		heme ABC transporter permease [Comamonadaceae bacterium CG2_30_60_41]
-2	Cytochrome c & Heme & Hydrogenase maturation	OIP20041	OIP20028.1	heme metabolism	PF03379.11@CcmB@CcmB protein;PF01061.22@ABC2_membrane@ABC-2 type transporter;		heme metabolism export protein CcmB [Comamonadaceae bacterium CG2_30_60_41]
-1	Cytochrome c & Heme & Hydrogenase maturation	OIP20041	OIP20040.1	heme metabolism	PF00005.25@ABC_tran@ABC transporter;		heme ABC exporter, ATP-binding protein CcmA [Comamonadaceae bacterium CG2_30_60_41]
0	Cytochrome c & Heme & Hydrogenase maturation	OIP20041	OIP20041.1	RQUA	PF13649.4@Methyltransf_25@Methyltransferase domain;PF08241.10@Methyltransf_11@Methyltransferase domain;PF01209.16@Ubie_methyltran@ubiE/COQ5 methyltransferase family;PF13847.4@Methyltransf_31@Methyltransferase domain;PF05401.9@NodS@Nodulation protein S (NodS);PF08242.10@Methyltransf_12@Methyltransferase domain;		methyltransferase [Comamonadaceae bacterium CG2_30_60_41]
1	Cytochrome c & Heme & Hydrogenase maturation	OIP20041	OIP20029.1		PF00043.23@GST_C@Glutathione S-transferase, C-terminal domain;PF13417.4@GST_N_3@Glutathione S-transferase, N-terminal domain;PF14497.4@GST_C_3@Glutathione S-transferase, C-terminal domain;PF02798.18@GST_N@Glutathione S-transferase, N-terminal domain;PF13410.4@GST_C_2@Glutathione S-transferase, C-terminal domain;PF13409.4@GST_N_2@Glutathione S-transferase, N-terminal domain;		glutathione transferase GstA [Comamonadaceae bacterium CG2_30_60_41]
2	Cytochrome c & Heme & Hydrogenase maturation	OIP20041	OIP20030.1		PF00365.18@PFK@Phosphofructokinase;		6-phosphofructokinase [Comamonadaceae bacterium CG2_30_60_41]
3	Cytochrome c & Heme & Hydrogenase maturation	OIP20041	OIP20031.1		PF02527.13@GidB@rRNA small subunit methyltransferase G;		16S rRNA (guanine(527)-N(7))-methyltransferase RsmG [Comamonadaceae bacterium CG2_30_60_41]
4	Cytochrome c & Heme & Hydrogenase maturation	OIP20041	OIP20032.1		PF01810.16@LysE@LysE type translocator;		lysine transporter LysE [Comamonadaceae bacterium CG2_30_60_41]
5	Cytochrome c & Heme & Hydrogenase maturation	OIP20041	OIP20033.1		PF13614.4@AAA_31@AAA domain;PF01656.21@CbiA@CobQ/CobB/MinD/ParA nucleotide binding domain;PF09140.9@MipZ@ATPase MipZ;PF10609.7@ParA@NUBPL iron-transfer P-loop NTPase;PF00142.16@Fer4_NifH@4Fe-4S iron sulfur cluster binding proteins, NifH/frxC family;PF06564.10@CBP_BcsQ@Cellulose biosynthesis protein BcsQ;PF02374.13@ArsA_ATPase@Anion-transporting ATPase;		chromosome partitioning protein [Comamonadaceae bacterium CG2_30_60_41]
6	Cytochrome c & Heme & Hydrogenase maturation	OIP20041	OIP20034.1		PF06821.11@Ser_hydrolase@Serine hydrolase;		alpha/beta hydrolase [Comamonadaceae bacterium CG2_30_60_41]
7	Cytochrome c & Heme & Hydrogenase maturation	OIP20041	OIP20035.1		PF02195.16@ParBc@ParB-like nuclease domain;		chromosome partitioning protein ParB [Comamonadaceae bacterium CG2_30_60_41]
8	Cytochrome c & Heme & Hydrogenase maturation	OIP20041	OIP20036.1		No Hit;		methyltransferase type 12 [Comamonadaceae bacterium CG2_30_60_41]
9	Cytochrome c & Heme & Hydrogenase maturation	OIP20041	OIP20037.1		PF13660.4@DUF4147@Domain of unknown function (DUF4147);PF05161.11@MOFRL@MOFRL family;		glycerate kinase [Comamonadaceae bacterium CG2_30_60_41]
10	Cytochrome c & Heme & Hydrogenase maturation	OIP20041	OIP20038.1		PF07690.14@MFS_1@Major Facilitator Superfamily;		hypothetical protein AUK52_11360 [Comamonadaceae bacterium CG2_30_60_41]
11	Cytochrome c & Heme & Hydrogenase maturation	OIP20041	OIP22850.1		PF01053.18@Cys_Met_Meta_PP@Cys/Met metabolism PLP-dependent enzyme;PF00155.19@Aminotran_1_2@Aminotransferase class I and II;PF01041.15@DegT_DnrJ_EryC1@DegT/DnrJ/EryC1/StrS aminotransferase family;PF00266.17@Aminotran_5@Aminotransferase class-V;		O-succinylhomoserine sulfhydrylase, partial [Comamonadaceae bacterium CG2_30_60_41]
12	Cytochrome c & Heme & Hydrogenase maturation	OIP20041	OIP22851.1		PF13537.4@GATase_7@Glutamine amidotransferase domain;PF13522.4@GATase_6@Glutamine amidotransferase domain;PF00156.25@Pribosyltran@Phosphoribosyl transferase domain;		amidophosphoribosyltransferase [Comamonadaceae bacterium CG2_30_60_41]
13	Cytochrome c & Heme & Hydrogenase maturation	OIP20041	OIP22852.1		PF02674.14@Colicin_V@Colicin V production protein;		colicin V synthesis protein [Comamonadaceae bacterium CG2_30_60_41]
14	Cytochrome c & Heme & Hydrogenase maturation	OIP20041	OIP22853.1		PF05036.11@SPOR@Sporulation related domain;		hypothetical protein AUK52_05435 [Comamonadaceae bacterium CG2_30_60_41]
-15	Cytochrome c & Heme & Hydrogenase maturation	WP_078364963	WP_078364948.1		PF00122.18@E1-E2_ATPase@E1-E2 ATPase;PF00702.24@Hydrolase@haloacid dehalogenase-like hydrolase;PF00403.24@HMA@Heavy-metal-associated domain;		copper-translocating P-type ATPase [Rhodoferax fermentans]
-14	Cytochrome c & Heme & Hydrogenase maturation	WP_078364963	WP_078364949.1		No Hit;		hypothetical protein [Rhodoferax fermentans]
-13	Cytochrome c & Heme & Hydrogenase maturation	WP_078364963	WP_078364950.1		PF03646.13@FlaG@FlaG protein;		hypothetical protein [Rhodoferax fermentans]
-12	Cytochrome c & Heme & Hydrogenase maturation	WP_078364963	WP_078364951.1		PF03776.12@MinE@Septum formation topological specificity factor MinE;		cell division topological specificity factor MinE [Rhodoferax fermentans]
-11	Cytochrome c & Heme & Hydrogenase maturation	WP_078364963	WP_078364952.1		PF01656.21@CbiA@CobQ/CobB/MinD/ParA nucleotide binding domain;PF10609.7@ParA@NUBPL iron-transfer P-loop NTPase;PF13614.4@AAA_31@AAA domain;PF09140.9@MipZ@ATPase MipZ;PF02374.13@ArsA_ATPase@Anion-transporting ATPase;PF00142.16@Fer4_NifH@4Fe-4S iron sulfur cluster binding proteins, NifH/frxC family;		septum site-determining protein MinD [Rhodoferax fermentans]
-10	Cytochrome c & Heme & Hydrogenase maturation	WP_078364963	WP_078364953.1		PF03775.14@MinC_C@Septum formation inhibitor MinC, C-terminal domain;		septum site-determining protein MinC [Rhodoferax fermentans]
-9	Cytochrome c & Heme & Hydrogenase maturation	WP_078364963	WP_078364954.1		PF07719.15@TPR_2@Tetratricopeptide repeat;PF14559.4@TPR_19@Tetratricopeptide repeat;PF13431.4@TPR_17@Tetratricopeptide repeat;PF13432.4@TPR_16@Tetratricopeptide repeat;PF00515.26@TPR_1@Tetratricopeptide repeat;PF13181.4@TPR_8@Tetratricopeptide repeat;PF13174.4@TPR_6@Tetratricopeptide repeat;PF12895.5@ANAPC3@Anaphase-promoting complex, cyclosome, subunit 3;PF13428.4@TPR_14@Tetratricopeptide repeat;		c-type cytochrome biogenesis protein CcmI [Rhodoferax fermentans]
-8	Cytochrome c & Heme & Hydrogenase maturation	WP_078364963	WP_078364955.1	Cytochrome c	PF03918.12@CcmH@Cytochrome C biogenesis protein;		cytochrome c-type biogenesis protein CcmH [Rhodoferax fermentans]
-7	Cytochrome c & Heme & Hydrogenase maturation	WP_078364963	WP_078364956.1		PF00578.19@AhpC-TSA@AhpC/TSA family;PF08534.8@Redoxin@Redoxin;PF13905.4@Thioredoxin_8@Thioredoxin-like;		DsbE family thiol:disulfide interchange protein [Rhodoferax fermentans]
-6	Cytochrome c & Heme & Hydrogenase maturation	WP_078364963	WP_078364957.1	heme metabolism	PF16327.3@CcmF_C@Cytochrome c-type biogenesis protein CcmF C-terminal;PF01578.18@Cytochrom_C_asm@Cytochrome C assembly protein;		heme lyase CcmF/NrfE family subunit [Rhodoferax fermentans]
-5	Cytochrome c & Heme & Hydrogenase maturation	WP_078364963	WP_078364958.1	heme metabolism	PF03100.13@CcmE@CcmE;		cytochrome c maturation protein CcmE [Rhodoferax fermentans]
-4	Cytochrome c & Heme & Hydrogenase maturation	WP_078364963	WP_078364959.1	heme metabolism	PF04995.12@CcmD@heme metabolism export protein D (CcmD);		heme metabolism export protein CcmD [Rhodoferax fermentans]
-3	Cytochrome c & Heme & Hydrogenase maturation	WP_078364963	WP_078364960.1	heme metabolism	PF01578.18@Cytochrom_C_asm@Cytochrome C assembly protein;		heme ABC transporter permease [Rhodoferax fermentans]
-2	Cytochrome c & Heme & Hydrogenase maturation	WP_078364963	WP_078364961.1	heme metabolism	PF03379.11@CcmB@CcmB protein;PF01061.22@ABC2_membrane@ABC-2 type transporter;		heme metabolism export protein CcmB [Rhodoferax fermentans]
-1	Cytochrome c & Heme & Hydrogenase maturation	WP_078364963	WP_078364962.1	heme metabolism	PF00005.25@ABC_tran@ABC transporter;		cytochrome c biogenesis heme-transporting ATPase CcmA [Rhodoferax fermentans]
0	Cytochrome c & Heme & Hydrogenase maturation	WP_078364963	WP_078364963.1	RQUA	PF13649.4@Methyltransf_25@Methyltransferase domain;PF08241.10@Methyltransf_11@Methyltransferase domain;PF01209.16@Ubie_methyltran@ubiE/COQ5 methyltransferase family;PF08242.10@Methyltransf_12@Methyltransferase domain;PF13847.4@Methyltransf_31@Methyltransferase domain;		class I SAM-dependent methyltransferase [Rhodoferax fermentans]
1	Cytochrome c & Heme & Hydrogenase maturation	WP_078364963	WP_078366893.1		PF00043.23@GST_C@Glutathione S-transferase, C-terminal domain;PF13417.4@GST_N_3@Glutathione S-transferase, N-terminal domain;PF02798.18@GST_N@Glutathione S-transferase, N-terminal domain;PF13409.4@GST_N_2@Glutathione S-transferase, N-terminal domain;PF14497.4@GST_C_3@Glutathione S-transferase, C-terminal domain;		glutathione transferase GstA [Rhodoferax fermentans]
2	Cytochrome c & Heme & Hydrogenase maturation	WP_078364963	WP_078364964.1		PF00365.18@PFK@Phosphofructokinase;		6-phosphofructokinase [Rhodoferax fermentans]
3	Cytochrome c & Heme & Hydrogenase maturation	WP_078364963	WP_078364965.1		PF01134.20@GIDA@Glucose inhibited division protein A;PF13932.4@GIDA_assoc@GidA associated domain;PF12831.5@FAD_oxidored@FAD dependent oxidoreductase;PF00890.22@FAD_binding_2@FAD binding domain;PF07992.12@Pyr_redox_2@Pyridine nucleotide-disulphide oxidoreductase;		tRNA uridine-5-carboxymethylaminomethyl(34) synthesis enzyme MnmG [Rhodoferax fermentans]
4	Cytochrome c & Heme & Hydrogenase maturation	WP_078364963	WP_078364966.1		PF02527.13@GidB@rRNA small subunit methyltransferase G;		16S rRNA (guanine(527)-N(7))-methyltransferase RsmG [Rhodoferax fermentans]
5	Cytochrome c & Heme & Hydrogenase maturation	WP_078364963	WP_078364967.1		PF01810.16@LysE@LysE type translocator;		lysine transporter LysE [Rhodoferax fermentans]
6	Cytochrome c & Heme & Hydrogenase maturation	WP_078364963	WP_078364968.1		PF13614.4@AAA_31@AAA domain;PF01656.21@CbiA@CobQ/CobB/MinD/ParA nucleotide binding domain;PF09140.9@MipZ@ATPase MipZ;PF10609.7@ParA@NUBPL iron-transfer P-loop NTPase;PF06564.10@CBP_BcsQ@Cellulose biosynthesis protein BcsQ;PF00142.16@Fer4_NifH@4Fe-4S iron sulfur cluster binding proteins, NifH/frxC family;PF02374.13@ArsA_ATPase@Anion-transporting ATPase;		ParA family protein [Rhodoferax fermentans]
7	Cytochrome c & Heme & Hydrogenase maturation	WP_078364963	WP_078366894.1		PF06821.11@Ser_hydrolase@Serine hydrolase;PF12697.5@Abhydrolase_6@Alpha/beta hydrolase family;		alpha/beta hydrolase [Rhodoferax fermentans]
8	Cytochrome c & Heme & Hydrogenase maturation	WP_078364963	WP_078364969.1		PF02195.16@ParBc@ParB-like nuclease domain;		chromosome partitioning protein ParB [Rhodoferax fermentans]
9	Cytochrome c & Heme & Hydrogenase maturation	WP_078364963	WP_078364970.1		No Hit;		methyltransferase type 12 [Rhodoferax fermentans]
10	Cytochrome c & Heme & Hydrogenase maturation	WP_078364963	WP_078364971.1		PF00582.24@Usp@Universal stress protein family;		universal stress protein [Rhodoferax fermentans]
11	Cytochrome c & Heme & Hydrogenase maturation	WP_078364963	WP_078364972.1		PF03741.14@TerC@Integral membrane protein TerC family;		hypothetical protein [Rhodoferax fermentans]
12	Cytochrome c & Heme & Hydrogenase maturation	WP_078364963	WP_078364973.1		PF03741.14@TerC@Integral membrane protein TerC family;PF00582.24@Usp@Universal stress protein family;		hypothetical protein [Rhodoferax fermentans]
13	Cytochrome c & Heme & Hydrogenase maturation	WP_078364963	WP_078364974.1		PF00126.25@HTH_1@Bacterial regulatory helix-turn-helix protein, lysR family;PF03466.18@LysR_substrate@LysR substrate binding domain;		transcriptional activator NhaR [Rhodoferax fermentans]
14	Cytochrome c & Heme & Hydrogenase maturation	WP_078364963	WP_078364975.1		PF04198.11@Sugar-bind@Putative sugar-binding domain;PF08281.10@Sigma70_r4_2@Sigma-70, region 4;		DNA-binding transcriptional regulator [Rhodoferax fermentans]
15	Cytochrome c & Heme & Hydrogenase maturation	WP_078364963	WP_078364976.1		PF13561.4@adh_short_C2@Enoyl-(Acyl carrier protein) reductase;PF00106.23@adh_short@short chain dehydrogenase;PF00596.19@Aldolase_II@Class II Aldolase and Adducin N-terminal domain;		bifunctional aldolase/short-chain dehydrogenase [Rhodoferax fermentans]
-15	Cytochrome c & Heme & Hydrogenase maturation	WP_079437395	WP_079437370.1		PF00860.18@Xan_ur_permease@Permease family;		purine permease [Zoogloea sp. LCSB751]
-14	Cytochrome c & Heme & Hydrogenase maturation	WP_083633809	WP_075585763.1		PF03741.14@TerC@Integral membrane protein TerC family;		hypothetical protein [Rhodoferax antarcticus]
-13	Cytochrome c & Heme & Hydrogenase maturation	WP_083633809	WP_075585764.1		PF00582.24@Usp@Universal stress protein family;		universal stress protein [Rhodoferax antarcticus]
-12	Cytochrome c & Heme & Hydrogenase maturation	WP_083633809	WP_075585765.1		No Hit;		class I SAM-dependent methyltransferase [Rhodoferax antarcticus]
-11	Cytochrome c & Heme & Hydrogenase maturation	WP_083633809	WP_075585766.1		PF02195.16@ParBc@ParB-like nuclease domain;		chromosome partitioning protein ParB [Rhodoferax antarcticus]
-10	Cytochrome c & Heme & Hydrogenase maturation	WP_083633809	WP_075585767.1		PF06821.11@Ser_hydrolase@Serine hydrolase;PF00561.18@Abhydrolase_1@alpha/beta hydrolase fold;PF12697.5@Abhydrolase_6@Alpha/beta hydrolase family;		serine hydrolase family protein [Rhodoferax antarcticus]
-9	Cytochrome c & Heme & Hydrogenase maturation	WP_083633809	WP_075585768.1		PF13614.4@AAA_31@AAA domain;PF01656.21@CbiA@CobQ/CobB/MinD/ParA nucleotide binding domain;PF09140.9@MipZ@ATPase MipZ;PF10609.7@ParA@NUBPL iron-transfer P-loop NTPase;PF06564.10@CBP_BcsQ@Cellulose biosynthesis protein BcsQ;PF00142.16@Fer4_NifH@4Fe-4S iron sulfur cluster binding proteins, NifH/frxC family;PF02374.13@ArsA_ATPase@Anion-transporting ATPase;		ParA family protein [Rhodoferax antarcticus]
-8	Cytochrome c & Heme & Hydrogenase maturation	WP_083633809	WP_075585769.1		PF01810.16@LysE@LysE type translocator;		lysine transporter LysE [Rhodoferax antarcticus]
-7	Cytochrome c & Heme & Hydrogenase maturation	WP_083633809	WP_075585770.1		PF02527.13@GidB@rRNA small subunit methyltransferase G;		16S rRNA (guanine(527)-N(7))-methyltransferase RsmG [Rhodoferax antarcticus]
-6	Cytochrome c & Heme & Hydrogenase maturation	WP_083633809	WP_075585771.1		PF13511.4@DUF4124@Domain of unknown function (DUF4124);		DUF4124 domain-containing protein [Rhodoferax antarcticus]
-5	Cytochrome c & Heme & Hydrogenase maturation	WP_083633809	WP_075585772.1		No Hit;		hypothetical protein [Rhodoferax antarcticus]
-4	Cytochrome c & Heme & Hydrogenase maturation	WP_083633809	WP_083633808.1		PF13565.4@HTH_32@Homeodomain-like domain;		helix-turn-helix domain-containing protein [Rhodoferax antarcticus]
-3	Cytochrome c & Heme & Hydrogenase maturation	WP_083633809	WP_075585774.1		PF01134.20@GIDA@Glucose inhibited division protein A;PF13932.4@GIDA_assoc@GidA associated domain;PF12831.5@FAD_oxidored@FAD dependent oxidoreductase;PF00890.22@FAD_binding_2@FAD binding domain;		tRNA uridine-5-carboxymethylaminomethyl(34) synthesis enzyme MnmG [Rhodoferax antarcticus]
-2	Cytochrome c & Heme & Hydrogenase maturation	WP_083633809	WP_075585896.1		PF00365.18@PFK@Phosphofructokinase;		6-phosphofructokinase [Rhodoferax antarcticus]
-1	Cytochrome c & Heme & Hydrogenase maturation	WP_083633809	WP_075585775.1		PF00043.23@GST_C@Glutathione S-transferase, C-terminal domain;PF02798.18@GST_N@Glutathione S-transferase, N-terminal domain;PF14497.4@GST_C_3@Glutathione S-transferase, C-terminal domain;PF13409.4@GST_N_2@Glutathione S-transferase, N-terminal domain;PF13417.4@GST_N_3@Glutathione S-transferase, N-terminal domain;		glutathione transferase GstA [Rhodoferax antarcticus]
0	Cytochrome c & Heme & Hydrogenase maturation	WP_083633809	WP_083633809.1	RQUA	PF13649.4@Methyltransf_25@Methyltransferase domain;PF08241.10@Methyltransf_11@Methyltransferase domain;PF01209.16@Ubie_methyltran@ubiE/COQ5 methyltransferase family;PF05401.9@NodS@Nodulation protein S (NodS);PF08242.10@Methyltransf_12@Methyltransferase domain;		class I SAM-dependent methyltransferase [Rhodoferax antarcticus]
1	Cytochrome c & Heme & Hydrogenase maturation	WP_083633809	WP_075585898.1	Cytochrome c biosynthesis	PF00005.25@ABC_tran@ABC transporter;		cytochrome c biogenesis heme-transporting ATPase CcmA [Rhodoferax antarcticus]
2	Cytochrome c & Heme & Hydrogenase maturation	WP_083633809	WP_075585776.1	heme metabolism	PF03379.11@CcmB@CcmB protein;PF01061.22@ABC2_membrane@ABC-2 type transporter;		heme metabolism export protein CcmB [Rhodoferax antarcticus]
3	Cytochrome c & Heme & Hydrogenase maturation	WP_083633809	WP_075585777.1	heme metabolism	PF01578.18@Cytochrom_C_asm@Cytochrome C assembly protein;		heme ABC transporter permease [Rhodoferax antarcticus]
4	Cytochrome c & Heme & Hydrogenase maturation	WP_083633809	WP_075585778.1	heme metabolism	PF04995.12@CcmD@heme metabolism export protein D (CcmD);		heme metabolism export protein CcmD [Rhodoferax antarcticus]
5	Cytochrome c & Heme & Hydrogenase maturation	WP_083633809	WP_075585779.1	Cytochrome c biosynthesis	PF03100.13@CcmE@CcmE;		cytochrome c maturation protein CcmE [Rhodoferax antarcticus]
6	Cytochrome c & Heme & Hydrogenase maturation	WP_083633809	WP_075585780.1	heme metabolism	PF16327.3@CcmF_C@Cytochrome c-type biogenesis protein CcmF C-terminal;PF01578.18@Cytochrom_C_asm@Cytochrome C assembly protein;		heme lyase CcmF/NrfE family subunit [Rhodoferax antarcticus]
7	Cytochrome c & Heme & Hydrogenase maturation	WP_083633809	WP_075585781.1		PF08534.8@Redoxin@Redoxin;PF00578.19@AhpC-TSA@AhpC/TSA family;		DsbE family thiol:disulfide interchange protein [Rhodoferax antarcticus]
8	Cytochrome c & Heme & Hydrogenase maturation	WP_083633809	WP_075585782.1	Cytochrome c biosynthesis	PF03918.12@CcmH@Cytochrome C biogenesis protein;		cytochrome c-type biogenesis protein CcmH [Rhodoferax antarcticus]
9	Cytochrome c & Heme & Hydrogenase maturation	WP_083633809	WP_075585783.1	Cytochrome c biosynthesis	PF07719.15@TPR_2@Tetratricopeptide repeat;PF00515.26@TPR_1@Tetratricopeptide repeat;PF14559.4@TPR_19@Tetratricopeptide repeat;PF13432.4@TPR_16@Tetratricopeptide repeat;PF13431.4@TPR_17@Tetratricopeptide repeat;PF13181.4@TPR_8@Tetratricopeptide repeat;PF13174.4@TPR_6@Tetratricopeptide repeat;PF13428.4@TPR_14@Tetratricopeptide repeat;PF12895.5@ANAPC3@Anaphase-promoting complex, cyclosome, subunit 3;		c-type cytochrome biogenesis protein CcmI [Rhodoferax antarcticus]
10	Cytochrome c & Heme & Hydrogenase maturation	WP_083633809	WP_075585784.1		PF03775.14@MinC_C@Septum formation inhibitor MinC, C-terminal domain;		septum site-determining protein MinC [Rhodoferax antarcticus]
11	Cytochrome c & Heme & Hydrogenase maturation	WP_083633809	WP_075585785.1		PF01656.21@CbiA@CobQ/CobB/MinD/ParA nucleotide binding domain;PF10609.7@ParA@NUBPL iron-transfer P-loop NTPase;PF13614.4@AAA_31@AAA domain;PF09140.9@MipZ@ATPase MipZ;PF02374.13@ArsA_ATPase@Anion-transporting ATPase;		septum site-determining protein MinD [Rhodoferax antarcticus]
12	Cytochrome c & Heme & Hydrogenase maturation	WP_083633809	WP_075585786.1		PF03776.12@MinE@Septum formation topological specificity factor MinE;		cell division topological specificity factor MinE [Rhodoferax antarcticus]
13	Cytochrome c & Heme & Hydrogenase maturation	WP_083633809	WP_075585787.1		PF00122.18@E1-E2_ATPase@E1-E2 ATPase;PF00702.24@Hydrolase@haloacid dehalogenase-like hydrolase;PF00403.24@HMA@Heavy-metal-associated domain;		copper-translocating P-type ATPase [Rhodoferax antarcticus]
14	Cytochrome c & Heme & Hydrogenase maturation	WP_083633809	WP_075585788.1		PF00403.24@HMA@Heavy-metal-associated domain;		copper chaperone [Rhodoferax antarcticus]
15	Cytochrome c & Heme & Hydrogenase maturation	WP_083633809	WP_083633810.1		PF13545.4@HTH_Crp_2@Crp-like helix-turn-helix domain;PF00027.27@cNMP_binding@Cyclic nucleotide-binding domain;PF00325.18@Crp@Bacterial regulatory proteins, crp family;		Crp/Fnr family transcriptional regulator [Rhodoferax antarcticus]
-15	Cytochrome c & Heme & Hydrogenase maturation	WP_088709583	WP_088709582.1		PF14522.4@Cytochrome_C7@Cytochrome c7 and related cytochrome c;		hypothetical protein [Noviherbaspirillum denitrificans]
-14	Cytochrome c & Heme & Hydrogenase maturation	WP_088709583	WP_088706411.1		PF13545.4@HTH_Crp_2@Crp-like helix-turn-helix domain;PF00027.27@cNMP_binding@Cyclic nucleotide-binding domain;		Crp/Fnr family transcriptional regulator [Noviherbaspirillum denitrificans]
-13	Cytochrome c & Heme & Hydrogenase maturation	WP_088709583	WP_088706412.1		PF00005.25@ABC_tran@ABC transporter;PF02463.17@SMC_N@RecF/RecN/SMC N terminal domain;PF13304.4@AAA_21@AAA domain, putative AbiEii toxin, Type IV TA system;		cytochrome c biogenesis heme-transporting ATPase CcmA [Noviherbaspirillum denitrificans]
-12	Cytochrome c & Heme & Hydrogenase maturation	WP_088709583	WP_088706413.1	heme metabolism	PF03379.11@CcmB@CcmB protein;		heme exporter protein CcmB [Noviherbaspirillum denitrificans]
-11	Cytochrome c & Heme & Hydrogenase maturation	WP_088709583	WP_088706414.1		PF01578.18@Cytochrom_C_asm@Cytochrome C assembly protein;		heme ABC transporter permease [Noviherbaspirillum denitrificans]
-10	Cytochrome c & Heme & Hydrogenase maturation	WP_088709583	WP_088706415.1		PF04995.12@CcmD@heme metabolism export protein D (CcmD);		heme exporter protein CcmD [Noviherbaspirillum denitrificans]
-9	Cytochrome c & Heme & Hydrogenase maturation	WP_088709583	WP_088706416.1		PF03100.13@CcmE@CcmE;		cytochrome c maturation protein CcmE [Noviherbaspirillum denitrificans]
-8	Cytochrome c & Heme & Hydrogenase maturation	WP_088709583	WP_088706417.1		PF16327.3@CcmF_C@Cytochrome c-type biogenesis protein CcmF C-terminal;PF01578.18@Cytochrom_C_asm@Cytochrome C assembly protein;		heme lyase CcmF/NrfE family subunit [Noviherbaspirillum denitrificans]
-7	Cytochrome c & Heme & Hydrogenase maturation	WP_088709583	WP_088706418.1		PF08534.8@Redoxin@Redoxin;PF00578.19@AhpC-TSA@AhpC/TSA family;PF13905.4@Thioredoxin_8@Thioredoxin-like;		DsbE family thiol:disulfide interchange protein [Noviherbaspirillum denitrificans]
-6	Cytochrome c & Heme & Hydrogenase maturation	WP_088709583	WP_088706419.1	Cytochrome c biosynthesis	PF03918.12@CcmH@Cytochrome C biogenesis protein;		cytochrome c-type biogenesis protein CcmH [Noviherbaspirillum denitrificans]
-5	Cytochrome c & Heme & Hydrogenase maturation	WP_088709583	WP_088706420.1	Cytochrome c biosynthesis	PF07719.15@TPR_2@Tetratricopeptide repeat;PF13431.4@TPR_17@Tetratricopeptide repeat;		c-type cytochrome biogenesis protein CcmI [Noviherbaspirillum denitrificans]
-4	Cytochrome c & Heme & Hydrogenase maturation	WP_088709583	WP_088706421.1		No Hit;		hypothetical protein [Noviherbaspirillum denitrificans]
-3	Cytochrome c & Heme & Hydrogenase maturation	WP_088709583	WP_088706422.1	Cytochrome c biosynthesis	PF00034.19@Cytochrom_C@Cytochrome c;		class I cytochrome c [Noviherbaspirillum denitrificans]
-2	Cytochrome c & Heme & Hydrogenase maturation	WP_088709583	WP_088706423.1	Cytochrome c biosynthesis	PF09699.8@Paired_CXXCH_1@Doubled CXXCH motif (Paired_CXXCH_1);PF14522.4@Cytochrome_C7@Cytochrome c7 and related cytochrome c;PF14537.4@Cytochrom_c3_2@Cytochrome c3;		cytochrome C [Noviherbaspirillum denitrificans]
-1	Cytochrome c & Heme & Hydrogenase maturation	WP_088709583	WP_088706424.1		PF11854.6@MtrB_PioB@Putative outer membrane beta-barrel porin, MtrB/PioB;		hypothetical protein [Noviherbaspirillum denitrificans]
0	Cytochrome c & Heme & Hydrogenase maturation	WP_088709583	WP_088709583.1	RQUA	PF13649.4@Methyltransf_25@Methyltransferase domain;PF01209.16@Ubie_methyltran@ubiE/COQ5 methyltransferase family;PF08241.10@Methyltransf_11@Methyltransferase domain;PF13847.4@Methyltransf_31@Methyltransferase domain;		class I SAM-dependent methyltransferase [Noviherbaspirillum denitrificans]
1	Cytochrome c & Heme & Hydrogenase maturation	WP_088709583	WP_088706425.1	Cytochrome c biosynthesis	PF00034.19@Cytochrom_C@Cytochrome c;		cytochrome C [Noviherbaspirillum denitrificans]
2	Cytochrome c & Heme & Hydrogenase maturation	WP_088709583	WP_088706426.1		PF02245.14@Pur_DNA_glyco@Methylpurine-DNA glycosylase (MPG);		3-methyladenine DNA glycosylase [Noviherbaspirillum denitrificans]
3	Cytochrome c & Heme & Hydrogenase maturation	WP_088709583	WP_088706427.1		PF07690.14@MFS_1@Major Facilitator Superfamily;		MFS transporter [Noviherbaspirillum denitrificans]
4	Cytochrome c & Heme & Hydrogenase maturation	WP_088709583	WP_088706428.1		PF00005.25@ABC_tran@ABC transporter;PF13304.4@AAA_21@AAA domain, putative AbiEii toxin, Type IV TA system;		ABC transporter ATP-binding protein [Noviherbaspirillum denitrificans]
5	Cytochrome c & Heme & Hydrogenase maturation	WP_088709583	WP_088706429.1		PF00005.25@ABC_tran@ABC transporter;PF13304.4@AAA_21@AAA domain, putative AbiEii toxin, Type IV TA system;PF12399.6@BCA_ABC_TP_C@Branched-chain amino acid ATP-binding cassette transporter;PF13476.4@AAA_23@AAA domain;		ABC transporter ATP-binding protein [Noviherbaspirillum denitrificans]
6	Cytochrome c & Heme & Hydrogenase maturation	WP_088709583	WP_088706430.1		PF02653.14@BPD_transp_2@Branched-chain amino acid transport system / permease component;		branched-chain amino acid ABC transporter permease [Noviherbaspirillum denitrificans]
7	Cytochrome c & Heme & Hydrogenase maturation	WP_088709583	WP_088706431.1		PF02653.14@BPD_transp_2@Branched-chain amino acid transport system / permease component;		branched-chain amino acid ABC transporter permease [Noviherbaspirillum denitrificans]
8	Cytochrome c & Heme & Hydrogenase maturation	WP_088709583	WP_088706432.1		PF13458.4@Peripla_BP_6@Periplasmic binding protein;PF13433.4@Peripla_BP_5@Periplasmic binding protein domain;PF01094.26@ANF_receptor@Receptor family ligand binding region;		ABC transporter substrate-binding protein [Noviherbaspirillum denitrificans]
9	Cytochrome c & Heme & Hydrogenase maturation	WP_088709583	WP_088706433.1		PF00440.21@TetR_N@Bacterial regulatory proteins, tetR family;		TetR/AcrR family transcriptional regulator [Noviherbaspirillum denitrificans]
10	Cytochrome c & Heme & Hydrogenase maturation	WP_088709583	WP_088706434.1		PF00903.23@Glyoxalase@Glyoxalase/Bleomycin resistance protein/Dioxygenase superfamily;		glyoxalase [Noviherbaspirillum denitrificans]
11	Cytochrome c & Heme & Hydrogenase maturation	WP_088709583	WP_088706435.1		PF01494.17@FAD_binding_3@FAD binding domain;		FAD-dependent oxidoreductase [Noviherbaspirillum denitrificans]
12	Cytochrome c & Heme & Hydrogenase maturation	WP_088709583	WP_088706436.1		PF01814.21@Hemerythrin@Hemerythrin HHE cation binding domain;		hemerythrin [Noviherbaspirillum denitrificans]
13	Cytochrome c & Heme & Hydrogenase maturation	WP_088709583	WP_088706437.1		PF00083.22@Sugar_tr@Sugar (and other) transporter;PF07690.14@MFS_1@Major Facilitator Superfamily;		MFS transporter [Noviherbaspirillum denitrificans]
14	Cytochrome c & Heme & Hydrogenase maturation	WP_088709583	WP_088706438.1		PF06481.12@COX_ARM@COX Aromatic Rich Motif;PF00116.18@COX2@Cytochrome C oxidase subunit II, periplasmic domain;		ubiquinol oxidase subunit II [Noviherbaspirillum denitrificans]
LIGHT HARVESTING
-15	Light Harvesting Complex	WP_088521682	WP_088521668.1		PF01729.17@QRPTase_C@Quinolinate phosphoribosyl transferase, C-terminal domain;PF02749.14@QRPTase_N@Quinolinate phosphoribosyl transferase, N-terminal domain;		nicotinate-nucleotide diphosphorylase (carboxylating) [Rhodoblastus acidophilus]
-14	Light Harvesting Complex	WP_088521682	WP_088521669.1		PF00890.22@FAD_binding_2@FAD binding domain;PF02910.18@Succ_DH_flav_C@Fumarate reductase flavoprotein C-term;PF01266.22@DAO@FAD dependent oxidoreductase;		L-aspartate oxidase [Rhodoblastus acidophilus]
-13	Light Harvesting Complex	WP_088521682	WP_088521670.1		PF02445.14@NadA@Quinolinate synthetase A protein;		quinolinate synthase NadA [Rhodoblastus acidophilus]
-12	Light Harvesting Complex	WP_088521682	WP_088521671.1		PF07819.11@PGAP1@PGAP1-like protein;PF00561.18@Abhydrolase_1@alpha/beta hydrolase fold;PF12146.6@Hydrolase_4@Serine aminopeptidase, S33;PF12697.5@Abhydrolase_6@Alpha/beta hydrolase family;		lipase [Rhodoblastus acidophilus]
-11	Light Harvesting Complex	WP_088521682	WP_088521672.1		PF00501.26@AMP-binding@AMP-binding enzyme;PF13193.4@AMP-binding_C@AMP-binding enzyme C-terminal domain;		long-chain-fatty-acid--CoA ligase [Rhodoblastus acidophilus]
-10	Light Harvesting Complex	WP_088521682	WP_088521673.1		No Hit;		hypothetical protein [Rhodoblastus acidophilus]
-9	Light Harvesting Complex	WP_088521682	WP_088521674.1		PF08494.9@DEAD_assoc@DEAD/H associated;PF00270.27@DEAD@DEAD/DEAH box helicase;PF00271.29@Helicase_C@Helicase conserved C-terminal domain;		DNA ligase-associated DEXH box helicase [Rhodoblastus acidophilus]
-8	Light Harvesting Complex	WP_088521682	WP_088521675.1		PF12706.5@Lactamase_B_2@Beta-lactamase superfamily domain;		DNA ligase-associated DEXH box helicase [Rhodoblastus acidophilus]
-7	Light Harvesting Complex	WP_088521682	WP_088521676.1		PF01068.19@DNA_ligase_A_M@ATP dependent DNA ligase domain;PF04679.13@DNA_ligase_A_C@ATP dependent DNA ligase C terminal region;		ATP-dependent DNA ligase [Rhodoblastus acidophilus]
-6	Light Harvesting Complex	WP_088521682	WP_088521677.1		PF13566.4@DUF4130@Domain of unknown function (DUF4130;PF03167.17@UDG@Uracil DNA glycosylase superfamily;		uracil-DNA glycosylase [Rhodoblastus acidophilus]
-5	Light Harvesting Complex	WP_088521682	WP_088521678.1		No Hit;		putative DNA modification/repair radical SAM protein [Rhodoblastus acidophilus]
-4	Light Harvesting Complex	WP_088521682	WP_088521679.1		No Hit;		hypothetical protein [Rhodoblastus acidophilus]
-3	Light Harvesting Complex	WP_088521682	WP_088521680.1		PF01593.22@Amino_oxidase@Flavin containing amine oxidoreductase;PF13450.4@NAD_binding_8@NAD(P)-binding Rossmann-like domain;PF01266.22@DAO@FAD dependent oxidoreductase;PF00890.22@FAD_binding_2@FAD binding domain;PF12831.5@FAD_oxidored@FAD dependent oxidoreductase;PF01946.15@Thi4@Thi4 family;		amine oxidase [Rhodoblastus acidophilus]
-2	Light Harvesting Complex	WP_088521682	WP_088521763.1		PF03706.11@LPG_synthase_TM@Lysylphosphatidylglycerol synthase TM region;		lysylphosphatidylglycerol synthetase family protein [Rhodoblastus acidophilus]
-1	Light Harvesting Complex	WP_088521682	WP_088521681.1		PF00535.24@Glycos_transf_2@Glycosyl transferase family 2;PF13641.4@Glyco_tranf_2_3@Glycosyltransferase like family 2;		glycosyltransferase [Rhodoblastus acidophilus]
0	Light Harvesting Complex	WP_088521682	WP_088521682.1	RQUA	PF01209.16@Ubie_methyltran@ubiE/COQ5 methyltransferase family;PF13649.4@Methyltransf_25@Methyltransferase domain;PF08241.10@Methyltransf_11@Methyltransferase domain;PF13489.4@Methyltransf_23@Methyltransferase domain;		methyltransferase [Rhodoblastus acidophilus]
1	Light Harvesting Complex	WP_088521682	WP_088521683.1	Cytochrome c	PF02276.16@CytoC_RC@Photosynthetic reaction centre cytochrome C subunit;PF14522.4@Cytochrome_C7@Cytochrome c7 and related cytochrome c;		photosynthetic reaction center cytochrome c subunit [Rhodoblastus acidophilus]
2	Light Harvesting Complex	WP_088521682	WP_088521684.1	LHC	PF00124.17@Photo_RC@Photosynthetic reaction centre protein;		photosynthetic reaction center subunit M [Rhodoblastus acidophilus]
3	Light Harvesting Complex	WP_088521682	WP_088521685.1	LHC	PF00124.17@Photo_RC@Photosynthetic reaction centre protein;		photosynthetic reaction center subunit L [Rhodoblastus acidophilus]
4	Light Harvesting Complex	WP_088521682	WP_088521686.1	LHC	PF00556.18@LHC@Antenna complex alpha/beta subunit;		light-harvesting protein [Rhodoblastus acidophilus]
5	Light Harvesting Complex	WP_088521682	WP_088521687.1	LHC	PF00556.18@LHC@Antenna complex alpha/beta subunit;		light-harvesting protein [Rhodoblastus acidophilus]
6	Light Harvesting Complex	WP_088521682	WP_088521688.1		No Hit;		hypothetical protein [Rhodoblastus acidophilus]
7	Light Harvesting Complex	WP_088521682	WP_088521689.1		PF00148.17@Oxidored_nitro@Nitrogenase component 1 type Oxidoreductase;PF08369.8@PCP_red@Proto-chlorophyllide reductase 57 kD subunit;		chlorophyllide a reductase subunit Z [Rhodoblastus acidophilus]
8	Light Harvesting Complex	WP_088521682	WP_088521690.1		PF00148.17@Oxidored_nitro@Nitrogenase component 1 type Oxidoreductase;		chlorophyllide a reductase subunit Y [Rhodoblastus acidophilus]
9	Light Harvesting Complex	WP_088521682	WP_088521691.1		PF00142.16@Fer4_NifH@4Fe-4S iron sulfur cluster binding proteins, NifH/frxC family;PF01656.21@CbiA@CobQ/CobB/MinD/ParA nucleotide binding domain;PF13614.4@AAA_31@AAA domain;PF10609.7@ParA@NUBPL iron-transfer P-loop NTPase;PF13500.4@AAA_26@AAA domain;PF02374.13@ArsA_ATPase@Anion-transporting ATPase;		chlorophyllide a reductase iron protein subunit X [Rhodoblastus acidophilus]
10	Light Harvesting Complex	WP_088521682	WP_088521692.1		No Hit;		chlorophyll synthesis pathway protein BchC [Rhodoblastus acidophilus]
11	Light Harvesting Complex	WP_088521682	WP_088521764.1		PF00891.16@Methyltransf_2@O-methyltransferase;PF16864.3@Dimerisation2@Dimerisation domain;PF13489.4@Methyltransf_23@Methyltransferase domain;PF08242.10@Methyltransf_12@Methyltransferase domain;PF05175.12@MTS@Methyltransferase small domain;PF13649.4@Methyltransf_25@Methyltransferase domain;		methyltransferase [Rhodoblastus acidophilus]
12	Light Harvesting Complex	WP_088521682	WP_088521765.1		PF00348.15@polyprenyl_synt@Polyprenyl synthetase;		geranylgeranyl pyrophosphate synthase [Rhodoblastus acidophilus]
13	Light Harvesting Complex	WP_088521682	WP_088521693.1		PF01593.22@Amino_oxidase@Flavin containing amine oxidoreductase;PF13450.4@NAD_binding_8@NAD(P)-binding Rossmann-like domain;PF00890.22@FAD_binding_2@FAD binding domain;		phytoene desaturase [Rhodoblastus acidophilus]
14	Light Harvesting Complex	WP_088521682	WP_088521694.1		No Hit;		hypothetical protein [Rhodoblastus acidophilus]
15	Light Harvesting Complex	WP_088521682	WP_088521695.1		PF00494.17@SQS_PSY@Squalene/phytoene synthase;		phytoene/squalene synthase family protein [Rhodoblastus acidophilus]
NiFe HYDROGENASE
-13	NiFe Hydrogenase	WP_014413544	WP_041793688.1		PF13692.4@Glyco_trans_1_4@Glycosyl transferases group 1;PF13439.4@Glyco_transf_4@Glycosyltransferase Family 4;PF00534.18@Glycos_transf_1@Glycosyl transferases group 1;		hypothetical protein [Pararhodospirillum photometricum]
-12	NiFe Hydrogenase	WP_014413544	WP_014413528.1		PF08669.9@GCV_T_C@Glycine cleavage T-protein C-terminal barrel domain;PF01571.19@GCV_T@Aminomethyltransferase folate-binding domain;		folate-binding protein [Pararhodospirillum photometricum]
-11	NiFe Hydrogenase	WP_014413544	WP_081581835.1		PF00158.24@Sigma54_activat@Sigma-54 interaction domain;PF14532.4@Sigma54_activ_2@Sigma-54 interaction domain;PF02954.17@HTH_8@Bacterial regulatory protein, Fis family;PF07728.12@AAA_5@AAA domain (dynein-related subfamily);PF00004.27@AAA@ATPase family associated with various cellular activities (AAA);		sigma-54-dependent Fis family transcriptional regulator [Pararhodospirillum photometricum]
-10	NiFe Hydrogenase	WP_014413544	WP_041793693.1	Hydrogenase maturation protein	PF02769.20@AIRS_C@AIR synthase related protein, C-terminal domain;PF00586.22@AIRS@AIR synthase related protein, N-terminal domain;		hydrogenase expression/formation protein HypE [Pararhodospirillum photometricum]
-9	NiFe Hydrogenase	WP_014413544	WP_014413531.1	Hydrogenase maturation protein	PF01924.14@HypD@Hydrogenase formation hypA family;		hydrogenase formation protein HypD [Pararhodospirillum photometricum]
-8	NiFe Hydrogenase	WP_014413544	WP_014413534.1	Hydrogenase maturation protein	PF02492.17@cobW@CobW/HypB/UreG, nucleotide-binding domain;		hydrogenase accessory protein HypB [Pararhodospirillum photometricum]
-7	NiFe Hydrogenase	WP_014413544	WP_014413535.1	Hydrogenase maturation protein	PF01155.17@HypA@Hydrogenase/urease nickel incorporation, metallochaperone, hypA;		hydrogenase nickel incorporation protein HypA [Pararhodospirillum photometricum]
-6	NiFe Hydrogenase	WP_014413544	WP_014413536.1	NiFe Hydrogenase	No Hit;		Ni,Fe-hydrogenase I large subunit [Pararhodospirillum photometricum]
-5	NiFe Hydrogenase	WP_014413544	WP_041793699.1		No Hit;		hypothetical protein [Pararhodospirillum photometricum]
-4	NiFe Hydrogenase	WP_014413544	WP_014413538.1	Hydrogenase maturation protein	PF04809.11@HupH_C@HupH hydrogenase expression protein, C-terminal conserved region;PF01455.16@HupF_HypC@HupF/HypC family;		HypC/HybG/HupF family hydrogenase formation chaperone [Pararhodospirillum photometricum]
-3	NiFe Hydrogenase	WP_014413544	WP_014413539.1	Hydrogenase maturation protein	PF01750.16@HycI@Hydrogenase maturation protease;		HyaD/HybD family hydrogenase maturation endopeptidase [Pararhodospirillum photometricum]
-2	NiFe Hydrogenase	WP_014413544	WP_014413540.1	NiFe Hydrogenase	PF01292.18@Ni_hydr_CYTB@Prokaryotic cytochrome b561;PF14358.4@DUF4405@Domain of unknown function (DUF4405);		Ni/Fe-hydrogenase, b-type cytochrome subunit [Pararhodospirillum photometricum]
-1	NiFe Hydrogenase	WP_014413544	WP_014413543.1	NiFe Hydrogenase	PF14720.4@NiFe_hyd_SSU_C@NiFe/NiFeSe hydrogenase small subunit C-terminal;PF01058.20@Oxidored_q6@NADH ubiquinone oxidoreductase, 20 Kd subunit;		Ni-Fe hydrogenase small subunit [Pararhodospirillum photometricum]
0	NiFe Hydrogenase	WP_014413544	WP_014413544.1	RQUA	PF13649.4@Methyltransf_25@Methyltransferase domain;PF13489.4@Methyltransf_23@Methyltransferase domain;		class I SAM-dependent methyltransferase [Pararhodospirillum photometricum]
1	NiFe Hydrogenase	WP_014413544	WP_014413545.1	UBI binding protein	PF03364.18@Polyketide_cyc@Polyketide cyclase / dehydrase and lipid transport;PF10604.7@Polyketide_cyc2@Polyketide cyclase / dehydrase and lipid transport;		ubiquinone-binding protein [Pararhodospirillum photometricum]
2	NiFe Hydrogenase	WP_014413544	WP_041793702.1		PF00196.17@GerE@Bacterial regulatory proteins, luxR family;PF00072.22@Response_reg@Response regulator receiver domain;PF08281.10@Sigma70_r4_2@Sigma-70, region 4;PF04545.14@Sigma70_r4@Sigma-70, region 4;		DNA-binding response regulator [Pararhodospirillum photometricum]
3	NiFe Hydrogenase	WP_014413544	WP_014413547.1		PF00563.18@EAL@EAL domain;PF00990.19@GGDEF@Diguanylate cyclase, GGDEF domain;PF00571.26@CBS@CBS domain;		GGDEF domain-containing protein [Pararhodospirillum photometricum]
4	NiFe Hydrogenase	WP_014413544	WP_014413548.1		No Hit;		DNA polymerase III subunit delta [Pararhodospirillum photometricum]
5	NiFe Hydrogenase	WP_014413544	WP_014413549.1		PF04390.10@LptE@Lipopolysaccharide-assembly;		twin-arginine translocation pathway signal [Pararhodospirillum photometricum]
6	NiFe Hydrogenase	WP_014413544	WP_014413550.1		PF13603.4@tRNA-synt_1_2@Leucyl-tRNA synthetase, Domain 2;PF00133.20@tRNA-synt_1@tRNA synthetases class I (I, L, M and V);PF09334.9@tRNA-synt_1g@tRNA synthetases class I (M);PF08264.11@Anticodon_1@Anticodon-binding domain of tRNA;		leucine--tRNA ligase [Pararhodospirillum photometricum]
7	NiFe Hydrogenase	WP_014413544	WP_014413551.1		PF12100.6@DUF3576@Domain of unknown function (DUF3576);		DUF3576 domain-containing protein [Pararhodospirillum photometricum]
8	NiFe Hydrogenase	WP_014413544	WP_014413552.1		PF02581.15@TMP-TENI@Thiamine monophosphate synthase/TENI;		thiamine monophosphate synthase [Pararhodospirillum photometricum]
[truncated: 163 more rows]

## Sheet: Bacteria_genes_nolinkage
RQUA accession number	Protein accession of neighbouring genes	Gene linkage	PFAM domains	Genbank Annotation	Genome Assembly	Strand
[truncated: 1,992 more rows]
